# Supplementary material for: Comparison of Blood Bacterial Communities in Periodontal Health and Periodontal Disease
Source: Front Cell Infect Microbiol. 2021 Jan 5;10:577485. doi: 10.3389/fcimb.2020.577485 (PMC7813997; doi:10.3389/fcimb.2020.577485)
Supplement: Supplementary Table 1 — Sequence read statistics and alpha diversity indices. [file Table_1.xlsx]

## Sheet: QCstat
Sample Name	Raw PE(#)	Combined(#)	Qualified(#)	Nochime(#)	Base(nt)	AvgLen(nt)	Q20	Q30	GC%	Effective%		Sample name	observed_species(OTUs)	shannon	simpson	chao1	ACE	goods_coverage	PD_whole_tree
MolYsis Samples
WB.84.P	343770	308190	266805	223823	95344710	426	98.18	96.18	52.52	65.11		WB.84.P	112	3.792	0.85	128.235	136.179	1	10.943
WB.87.C	589146	525522	456159	394958	165137816	418	98.08	96.01	53.9	67.04		WB.87.C	102	3.831	0.853	144.167	127.774	1	10.068
WB.88.P	480789	439556	390744	351466	149244408	427	98.29	96.36	52.85	69.27		WB.88.P	189	3.985	0.842	203.615	201.025	1	16.546
WB.89.P	480093	438332	392059	320128	135586289	423	98.39	96.62	52.9	68.6		WB.89.P	190	4.42	0.894	214.167	215.999	1	16.247
WB.90.C	562733	515225	458285	406144	173074761	425	98.36	96.53	52.9	71.09		WB.90.C	172	3.542	0.787	175.667	177.76	1	15.395
WB.91.P	217374	198645	176798	151329	64174094	424	98.37	96.56	52.78	69.06		WB.91.P	171	4.304	0.908	205.5	186.576	1	15.88
WB.92.P	427906	387992	346338	302073	127951718	425	98.33	96.52	52.02	72.79		WB.92.P	206	3.918	0.847	220	224.345	1	17.512
WB.93.C	348817	314412	274441	237268	101036703	426	98.34	96.5	52.72	66.46		WB.93.C	250	3.265	0.705	298.75	273.723	1	19.376
WB.94.C	597706	542421	477361	400796	170954750	425	98.32	96.46	52.25	68.85		WB.94.C	220	3.632	0.859	247.188	234.779	1	19.015
WB.95.C	654571	588969	522148	434267	183655781	426	98.38	96.57	52.2	71.85		WB.95.C	221	4.916	0.93	245	242.44	1	19.207
WB.96.C	591810	532861	463382	412777	176387258	425	98.38	96.54	53.68	76.41		WB.96.C	256	2.68	0.57	263.435	264.806	1	20.858
WB.97.P	614680	555162	488128	415800	176278279	428	98.37	96.55	51.91	74.75		WB.97.P	258	4.374	0.897	287	276.117	1	21.133
WB.98.P	648243	589512	522016	366378	156340920	424	98.37	96.55	53.46	73.37		WB.98.P	256	4.1	0.844	308.5	277.502	1	20.686
WB.99.P	304873	276548	245086	202894	86242147	426	98.4	96.6	52.63	74.8		WB.99.P	239	4.568	0.905	256.647	251.76	1	20.188
WB.100.P	312693	282641	247140	216589	92475906	425	98.39	96.59	53.13	74.05		WB.100.P	177	3.721	0.816	186.5	186.269	1	16.011
WB.101.P	233264	212875	189386	160015	67665737	425	98.36	96.53	53.39	73.19		WB.101.P	212	4.182	0.872	239.556	233.304	1	18.109
WB.102.P	370459	338170	299662	263343	112035938	422	98.36	96.53	53.42	74.18		WB.102.P	195	3.776	0.801	204.731	207.443	1	16.259
WB.103.P	447058	406193	360256	308734	131042452	426	98.46	96.73	52.85	73.96		WB.103.P	205	3.968	0.867	213.636	214.455	1	18.075
WB.104.P	472417	430465	379621	343857	146084297	424	98.35	96.5	53.81	75.61		WB.104.P	239	4.109	0.878	245.12	247.379	1	19.647
WB.105.C	504905	457373	404750	335576	142923562	424	98.35	96.55	53.49	70.59		WB.105.C	236	3.996	0.842	258.556	255.623	1	18.633
WB.106.P	504518	459126	404590	347363	147618425	428	98.37	96.55	51.8	71.26		WB.106.P	227	3.893	0.822	241.773	241.68	1	18.856
WB.107.P	245843	223905	198112	176628	75270725	424	98.38	96.63	52.22	69.74		WB.107.P	206	3.674	0.816	213.158	213.237	1	17.601
WB.108.C	179575	163872	145298	137209	58336710	426	98.3	96.39	52.91	64.93		WB.108.C	192	4.248	0.906	200.5	201.709	1	16.181
WB.109.P	171427	155594	136074	128139	54835655	425	98.37	96.55	52.88	73.83		WB.109.P	211	2.4	0.53	212.895	214.198	1	16.965
WB.110.C	306891	281272	249567	225170	95501398	425	98.38	96.61	52.35	73.1		WB.110.C	188	3.466	0.817	189.333	191.257	1	15.805
WB.111.C	306540	279779	247588	229290	97678857	424	98.34	96.5	53.65	66.68		WB.111.C	212	4.003	0.86	230.75	227.269	1	17.762
WB.112.P	292750	266814	237184	216785	92134200	426	98.4	96.63	52.15	72.17		WB.112.P	239	4.643	0.885	268.545	255.074	1	19.191
WB.113.C	291401	265413	236051	213270	90652397	424	98.36	96.51	53.71	69.62		WB.113.C	235	4.642	0.917	244.562	245.737	1	19.379
WB.114.C	300213	275120	245493	222707	93976456	424	98.38	96.58	53.05	70.59		WB.114.C	219	4.601	0.916	227	226.976	1	17.843
WB.115.C	184838	169431	151340	136710	58229880	426	98.32	96.45	52.37	68.02		WB.115.C	204	3.745	0.827	210.176	211.192	1	17.153
WB.117.C	213898	195666	173676	161719	68516693	427	98.3	96.4	52.8	67.06		WB.117.C	193	4.761	0.928	210.105	209.494	1	16.976
WB.118.C	402325	362837	322197	283998	120445338	423	98.32	96.47	53.71	66.34		WB.118.C	175	2.68	0.667	183.571	183.274	1	15.597
WB.119.C	226071	206521	181433	161088	69000108	427	98.29	96.38	51.8	69.75		WB.119.C	189	1.989	0.482	218.526	214.558	1	17.297
WB.121.C	191219	174721	155903	133359	56603238	424	98.3	96.44	52.81	67.64		WB.121.C	183	4.126	0.857	188.077	188.693	1	40.627
WB.122.C	144511	131244	115256	93827	39925730	427	98.29	96.39	52.6	56.52		WB.122.C	177	4.004	0.858	178.895	181.094	1	31.32
WB.123.C	354754	324863	288763	261909	111301475	425	98.33	96.5	52.91	66.55		WB.123.C	160	4.404	0.902	176.154	171.762	1	14.385
Average	375558	341034	301364	260483	1.10657e+08	424.972	98.3406	96.4989	52.8481	70.1342			203.222	3.89883	0.826583	220.555	217.013	1	18.4091
StDev	152511	137470	120994	98541.7	4.17818e+07	1.82813	0.0649811	0.129035	0.598445	3.9436			35.6444	0.652765	0.10731	39.5772	35.9364	0	5.048
Total DNA Samples
WBP85C	205656	180165	175563	143668	59535558	414	96.55	90.55	54.12	69.86		WBP85C	177	5.728	0.965	184	180.492	1	17.196
WBP90C	208851	178278	173027	136547	56781100	416	96.17	89.62	54.16	65.38		WBP90C	210	5.446	0.951	212.333	212.601	1	18.213
WBP96C	216358	186646	181165	158366	65815439	416	96.35	90.14	54.15	73.2		WBP96C	176	5.371	0.96	177.5	178.955	1	16.064
WBP98P	202472	177187	172581	143190	59423034	415	96.48	90.43	54.2	70.72		WBP98P	197	5.442	0.946	197.667	199.08	1	17.628
Average	208334	180569	175584	145443	6.03888e+07	415.25	96.3875	90.185	54.1575	69.79			190	5.49675	0.9555	192.875	192.782	1	17.2752
StDev	5949.41	4233.98	3945.64	9208.14	3.83513e+06	0.957427	0.167008	0.414126	0.0330404	3.26323			16.4722	0.157969	0.00858293	15.4567	16.0695	0	0.908701
Notes: Raw PE means PE reads; Raw Tags means tags merged from PE reads; Clean Tags means reads after QC filtering; Effective Tags means tags after filtering chimera; Base means base number of Effective tags; AvgLen means average length of Effective Tags; Q20 and Q30 mean the precentage of base whose quality greater than 20 and 30; GC (%) means GC content in Effective Tags; Effective (%) means the…
