# Supplementary material for: Comparison of Blood Bacterial Communities in Periodontal Health and Periodontal Disease
Source: Front Cell Infect Microbiol. 2021 Jan 5;10:577485. doi: 10.3389/fcimb.2020.577485 (PMC7813997; doi:10.3389/fcimb.2020.577485)
Supplement: Supplementary Table 2 — Relative abundance (Phylum). [file Table_2.xlsx]

## Sheet: otu_table.p.relative
MolYsis (Phylum)																																										Total DNA
Taxonomy	WB.87.C	WB.90.C	WB.93.C	WB.94.C	WB.95.C	WB.96.C	WB.105.C	WB.108.C	WB.110.C	WB.111.C	WB.113.C	WB.114.C	WB.115.C	WB.117.C	WB.118.C	WB.119.C	WB.121.C	WB.122.C	WB.123.C	WB.84.P	WB.88.P	WB.89.P	WB.91.P	WB.92.P	WB.97.P	WB.98.P	WB.99.P	WB.100.P	WB.101.P	WB.102.P	WB.103.P	WB.104.P	WB.106.P	WB.107.P	WB.109.P	WB.112.P	Average	Tax_detail				Taxonomy	WBP85C	WBP90C	WBP96C	WBP98P	Average	Tax_detail
Firmicutes	0.441266	0.756952	0.711908	0.611438	0.512409	0.865254	0.690672	0.634643	0.577335	0.748077	0.609631	0.640829	0.799436	0.48063	0.228868	0.800684	0.700827	0.644605	0.614343	0.721354	0.680892	0.575043	0.688821	0.628565	0.552871	0.702818	0.503244	0.666175	0.583736	0.726292	0.73081	0.611772	0.75947	0.737921	0.81027	0.654686	0.650126	k__Bacteria;p__Firmicutes;				Proteobacteria	0.340915	0.467659	0.424608	0.495324	0.432126	k__Bacteria;p__Proteobacteria;
Proteobacteria	0.0835584	0.0812669	0.076103	0.273568	0.25273	0.0519187	0.161103	0.137812	0.351586	0.0498316	0.16063	0.0809011	0.0960055	0.133078	0.715329	0.144794	0.173475	0.132691	0.196465	0.149796	0.0884641	0.135789	0.105333	0.0624724	0.16858	0.179015	0.27941	0.201812	0.214603	0.0519725	0.0744462	0.112842	0.0766839	0.110228	0.133573	0.120868	0.156076	k__Bacteria;p__Proteobacteria;				Actinobacteria	0.252016	0.218732	0.218992	0.194508	0.221062	k__Bacteria;p__Actinobacteria;
Actinobacteria	0.442923	0.0713802	0.144062	0.0986305	0.20136	0.0368573	0.0949727	0.17838	0.0622358	0.12403	0.145514	0.189365	0.0741988	0.230697	0.0446355	0.0226996	0.0772326	0.160608	0.130969	0.10856	0.134638	0.248846	0.196347	0.226566	0.171248	0.0549848	0.154519	0.11055	0.159973	0.142889	0.155197	0.0630641	0.103181	0.0770282	0.031758	0.134896	0.133472	k__Bacteria;p__Actinobacteria;				Firmicutes	0.23381	0.199851	0.20764	0.174578	0.20397	k__Bacteria;p__Firmicutes;
Bacteroidetes	0.0321776	0.0890235	0.0553828	0.0043678	0.0326724	0.0299399	0.0521016	0.0479705	0.0084774	0.0664529	0.0650544	0.0246469	0.0296064	0.134477	0.010317	0.031091	0.0435704	0.0541349	0.0122643	0.0011296	0.0609448	0.0222801	0.00910137	0.0523598	0.104547	0.0404613	0.0509397	0.0114251	0.0212043	0.0774585	0.025486	0.195873	0.0492937	0.0407087	0.0223231	0.0876249	0.0471358	k__Bacteria;p__Bacteroidetes;				Bacteroidetes	0.152593	0.0963036	0.142995	0.12679	0.12967	k__Bacteria;p__Bacteroidetes;
Fusobacteria	7.53069e-05	0.00131249	0.0112422	0.00329199	0.000279711	0.0158682	0.000710036	0.000978989	0.000182888	0.000247437	0.000903683	0.0638172	0.000430325	0.00796101	0.000731553	0.000656246	0.00427098	0.00514238	0.0316827	0.0191602	0.0349962	0.0119523	0.000322744	0.0299183	0.00236679	0.00855271	0.000473358	0.000656246	0.0204404	0.00129098	0.0139533	0.0163416	0.0112745	0.0221725	0.00196874	0.00167827	0.00964735	k__Bacteria;p__Fusobacteria;				Fusobacteria	0.0156149	0.0142428	0.00488302	0.00874651	0.0108718	k__Bacteria;p__Fusobacteria;
Spirochaetes	0	1.07581e-05	0.000849892	0.00868181	8.6065e-05	0.000150614	0.000365776	0.000215163	0.000182888	0.0113498	0.0181705	0.000441083	0.000268953	0.0131572	7.53069e-05	5.37906e-05	0.000118339	0.000290469	0.0141039	0	2.15163e-05	9.68231e-05	1.07581e-05	0.000118339	0.000333502	0.0141577	0.0113713	0.00934881	2.15163e-05	9.68231e-05	6.45488e-05	6.45488e-05	6.45488e-05	5.37906e-05	0.000107581	0.000247437	0.00290977	k__Bacteria;p__Spirochaetes;				Spirochaetes	0.00503634	0.00321191	0.00088155	5.36596e-05	0.00229586	k__Bacteria;p__Spirochaetes;
SR1_(Absconditabacteria)	0	0	0	0	0	0	4.30325e-05	0	0	0	0	0	5.37906e-05	0	0	1.07581e-05	0	0	0	0	0	0	1.07581e-05	0	0	0	3.22744e-05	3.22744e-05	1.07581e-05	0	1.07581e-05	4.30325e-05	3.22744e-05	0.0118877	0	0	0.000337984	k__Bacteria;p__SR1_(Absconditabacteria);				Others	1.53313e-05	0	0	2.22045e-16	3.83283e-06	Others
Acidobacteria	0	5.37906e-05	0	0	0	0	3.22744e-05	0	0	0	8.6065e-05	0	0	0	4.30325e-05	0	0	9.68231e-05	0	0	4.30325e-05	0.00599228	5.37906e-05	0	5.37906e-05	0	0	0	0	0	0	0	0	0	0	0	0.000179302	k__Bacteria;p__Acidobacteria;
Others	0	0	0	0	1.11022e-16	0	3.33067e-16	0	0	0	5.55112e-16	0	1.11022e-16	1.11022e-16	2.22045e-16	0	0.000505632	0.00243134	0	0	4.44089e-16	1.11022e-16	0	0	0	0	3.33067e-16	0	0	0	0	2.22045e-16	0	0	0	3.33067e-16	8.15824e-05	Others
Gemmatimonadetes	0	0	0	2.15163e-05	0.000462599	0	0	0	0	1.07581e-05	0	0	0	0	0	0	0	0	0	0	0	0	0	0	0	0	1.07581e-05	0	0	0	3.22744e-05	0	0	0	0	0	1.49418e-05	k__Bacteria;p__Gemmatimonadetes;
Ignavibacteriae	0	0	0.000451841	0	0	1.07581e-05	0	0	0	0	0	0	0	0	0	0	0	0	0	0	0	0	0	0	0	1.07581e-05	0	0	1.07581e-05	0	0	0	0	0	0	0	1.34477e-05	k__Bacteria;p__Ignavibacteriae;
Saccharibacteria	0	0	0	0	0	0	0	0	0	0	0	0	0	0	0	0	0	0	0.00017213	0	0	0	0	0	0	0	0	0	0	0	0	0	0	0	0	0	4.78139e-06	k__Bacteria;p__Saccharibacteria;
Tenericutes	0	0	0	0	0	0	0	0	0	0	0	0	0	0	0	1.07581e-05	0	0	0	0	0	0	0	0	0	0	0	0	0	0	0	0	0	0	0	0	2.98837e-07	k__Bacteria;p__Tenericutes;
Deinococcus-Thermus	0	0	0	0	0	0	0	0	0	0	1.07581e-05	0	0	0	0	0	0	0	0	0	0	0	0	0	0	0	0	0	0	0	0	0	0	0	0	0	2.98837e-07	k__Bacteria;p__Deinococcus-Thermus;
Synergistetes	0	0	0	0	0	0	0	0	0	0	0	0	0	0	0	0	0	0	0	0	0	0	0	0	0	0	0	0	0	0	0	0	0	0	0	0	0	k__Bacteria;p__Synergistetes;
