# Supplementary material for: Comparison of Blood Bacterial Communities in Periodontal Health and Periodontal Disease
Source: Front Cell Infect Microbiol. 2021 Jan 5;10:577485. doi: 10.3389/fcimb.2020.577485 (PMC7813997; doi:10.3389/fcimb.2020.577485)
Supplement: Supplementary Table 3 — Relative Abundance (Class). [file Table_3.xlsx]

## Sheet: otu_table.c.relative
MolYsis (Class)																																													Total DNA (Class)
Taxonomy	WB.87.C	WB.90.C	WB.93.C	WB.94.C	WB.95.C	WB.96.C	WB.105.C	WB.108.C	WB.110.C	WB.111.C	WB.113.C	WB.114.C	WB.115.C	WB.117.C	WB.118.C	WB.119.C	WB.121.C	WB.122.C	WB.123.C	WB.84.P	WB.88.P	WB.89.P	WB.91.P	WB.92.P	WB.97.P	WB.98.P	WB.99.P	WB.100.P	WB.101.P	WB.102.P	WB.103.P	WB.104.P	WB.106.P	WB.107.P	WB.109.P	WB.112.P	Average	Tax_detail							Taxonomy	WBP85C	WBP90C	WBP96C	WBP98P
Bacilli	0.359483	0.732058	0.700978	0.596775	0.459533	0.85441	0.671113	0.61175	0.572289	0.730584	0.572483	0.571117	0.766258	0.469904	0.22066	0.798307	0.589158	0.636698	0.57131	0.697686	0.660818	0.562112	0.602745	0.620421	0.537368	0.678558	0.489699	0.65404	0.576539	0.704819	0.701505	0.568406	0.702818	0.717341	0.804923	0.609943	0.621517	k__Bacteria;p__Firmicutes;c__Bacilli;							unidentified_Actinobacteria	0.251341	0.211166	0.218402	0.180633
unidentified_Actinobacteria	0.442912	0.0700677	0.140092	0.0983938	0.201123	0.0359859	0.0888729	0.164675	0.0610954	0.122761	0.13523	0.17355	0.0721332	0.230278	0.0431186	0.0225813	0.0769851	0.159758	0.13055	0.108517	0.133616	0.223823	0.155154	0.220402	0.148796	0.0530698	0.153927	0.10969	0.15979	0.142728	0.155046	0.0553828	0.102234	0.0766732	0.0306176	0.122944	0.128405	k__Bacteria;p__Actinobacteria;c__unidentified_Actinobacteria;							Bacilli	0.217636	0.179522	0.180863	0.167456
Gammaproteobacteria	0.0664852	0.0596538	0.0453778	0.252192	0.074769	0.0388691	0.139027	0.127247	0.0272503	0.0195152	0.145837	0.0522522	0.0639355	0.0471206	0.0143621	0.139307	0.160328	0.116855	0.11891	0.121664	0.064538	0.109313	0.0877325	0.054576	0.124762	0.150097	0.21314	0.181683	0.093628	0.0237432	0.0171592	0.0738868	0.0475079	0.0970168	0.124966	0.0800512	0.0937433	k__Bacteria;p__Proteobacteria;c__Gammaproteobacteria;							Betaproteobacteria	0.113352	0.233082	0.12889	0.229556
Betaproteobacteria	0.00266802	0.00440007	0.0258195	0.0135552	0.136639	0.00750917	0.00580939	0.00829451	0.183114	0.0278743	0.00753069	0.00942412	0.00316289	0.0733704	0.553936	0.00337805	0.0125762	0.00770282	0.0770389	0.0243349	0.0095317	0.00738007	0.0161264	0.00684217	0.00401278	0.012275	0.0341678	0.00954246	0.0171269	0.00850968	0.0438501	0.028111	0.00627199	0.0106613	0.00275408	0.0316827	0.0399162	k__Bacteria;p__Proteobacteria;c__Betaproteobacteria;							Gammaproteobacteria	0.133896	0.153098	0.200871	0.12843
Bacteroidia	0.0321776	0.0623649	0.0551784	0.00421719	0.0161695	0.0292729	0.0240552	0.04768	0.00584166	0.0531774	0.0386755	0.023528	0.0288533	0.112336	0.00653018	0.0298646	0.0353297	0.0444741	0.00818693	0.000107581	0.0603638	0.021484	0.00134477	0.0522952	0.0999968	0.0399987	0.0196443	0.0112315	0.0104031	0.064538	0.0249804	0.177649	0.0327692	0.0403322	0.0198595	0.0663669	0.0389244	k__Bacteria;p__Bacteroidetes;c__Bacteroidia;							Bacteroidia	0.144743	0.0916429	0.130753	0.116648
Clostridia	0.0817618	0.0248513	0.0101987	0.0146203	0.0497563	0.0107151	0.0195045	0.0227642	0.00501329	0.0155455	0.0369434	0.0693684	0.033135	0.0106936	0.00820845	0.00237755	0.111669	0.00790722	0.0429464	0.0236679	0.0200531	0.0129313	0.0860758	0.00804708	0.015255	0.0179553	0.0134369	0.00937033	0.00715415	0.0214517	0.0286812	0.043323	0.0565555	0.020548	0.00519617	0.0446355	0.0281199	k__Bacteria;p__Firmicutes;c__Clostridia;							Alphaproteobacteria	0.08561	0.0752537	0.070846	0.121071
Alphaproteobacteria	0.0143836	0.0170731	0.00488419	0.00690672	0.0284122	0.00544361	0.0161587	0.00193646	0.141179	0.00234527	0.00707885	0.0191925	0.028864	0.0111669	0.146934	0.00155993	0.000570181	0.00803632	0.000505632	0.000161372	0.0142222	0.013566	0.00133401	0.000968231	0.0395576	0.0095317	0.0319301	0.0105537	0.103837	0.0196659	0.00137704	0.0107796	0.0228503	0.00245285	0.00585242	0.00907986	0.0211209	k__Bacteria;p__Proteobacteria;c__Alphaproteobacteria;							Clostridia	0.0160902	0.0181599	0.0267685	0.00706007
Fusobacteriia	7.53069e-05	0.00131249	0.0112422	0.00329199	0.000279711	0.0158682	0.000710036	0.000978989	0.000182888	0.000247437	0.000903683	0.0638172	0.000430325	0.00796101	0.000731553	0.000656246	0.00427098	0.00514238	0.0316827	0.0191602	0.0349962	0.0119523	0.000322744	0.0299183	0.00236679	0.00855271	0.000473358	0.000656246	0.0204404	0.00129098	0.0139533	0.0163416	0.0112745	0.0221725	0.00196874	0.00167827	0.00964735	k__Bacteria;p__Fusobacteria;c__Fusobacteriia;							Fusobacteriia	0.0156149	0.0142428	0.00488302	0.00874651
Flavobacteriia	0	0.0199025	0.000139856	8.6065e-05	0.016503	0.000580939	0.00448614	0.000279711	0.00261422	0.0132433	0.0261853	0.00106505	0.000677762	0.0220542	0.00186116	0.000301228	0.00820845	0.00956397	0.00407733	1.07581e-05	0.000473358	0.00068852	0.0076813	6.45488e-05	0.00443235	0.000387293	0.0239261	6.45488e-05	0.0106505	0.000204404	0.000398051	0.000710036	0.0162663	0.000215163	0.000484116	0.0211612	0.00610135	k__Bacteria;p__Bacteroidetes;c__Flavobacteriia;							Epsilonproteobacteria	0.00797995	0.000789562	0.0238862	0.0104406
Rubrobacteria	0	0.0011296	0.00378686	6.45488e-05	6.45488e-05	0.000473358	0.00545437	0.0137059	0.00114036	0.00126946	0.00942412	0.0158144	0.00206556	0.000247437	0.000258195	0.000107581	0.000150614	0.000462599	0.000419567	0	0.000753069	0.0113175	0.0409669	0.00601379	0.00100051	0.00160296	0.000333502	0.000828376	0.000161372	0.000107581	9.68231e-05	0.000333502	0.00086065	0.000322744	0.00114036	0.0118447	0.00371454	k__Bacteria;p__Actinobacteria;c__Rubrobacteria;							Flavobacteriia	0.00782663	0.0030586	0.0120887	0.00551927
unidentified_Spirochaetes	0	1.07581e-05	0.000849892	0.00868181	8.6065e-05	0.000150614	0.000365776	0.000215163	0.000182888	0.0113498	0.0181705	0.000441083	0.000268953	0.0131572	7.53069e-05	5.37906e-05	0.000118339	0.000290469	0.0141039	0	2.15163e-05	9.68231e-05	1.07581e-05	0.000118339	0.000333502	0.0141577	0.0113713	0.00934881	2.15163e-05	9.68231e-05	6.45488e-05	6.45488e-05	6.45488e-05	5.37906e-05	0.000107581	0.000247437	0.00290977	k__Bacteria;p__Spirochaetes;c__unidentified_Spirochaetes;							Acidimicrobiia	3.06626e-05	0.000199307	0.000513599	0.0136909
Coriobacteriia	1.07581e-05	0.000182888	0.000182888	0.00017213	0.00017213	0.000398051	0.000645488	0	0	0	0.00086065	0	0	0.00017213	0.0012587	1.07581e-05	9.68231e-05	0.000387293	0	3.22744e-05	0.000268953	0.0137059	0.000225921	0.000150614	0.0214517	0.000311986	0.000258195	3.22744e-05	2.15163e-05	5.37906e-05	5.37906e-05	0.0073478	8.6065e-05	3.22744e-05	0	0.000107581	0.00135254	k__Bacteria;p__Actinobacteria;c__Coriobacteriia;							Deltaproteobacteria	7.66565e-05	0.00543495	0.000114985	0.0058259
Sphingobacteriia	0	0	5.37906e-05	5.37906e-05	0	2.15163e-05	0.0234312	1.07581e-05	2.15163e-05	3.22744e-05	0.000161372	2.15163e-05	7.53069e-05	1.07581e-05	3.22744e-05	0.000892924	0	9.68231e-05	0	0.00101126	0	3.22744e-05	1.07581e-05	0	8.6065e-05	2.15163e-05	0.00534679	7.53069e-05	0.000118339	0.0126731	5.37906e-05	0.000182888	0.000129098	0.000107581	0.0019795	4.30325e-05	0.00129964	k__Bacteria;p__Bacteroidetes;c__Sphingobacteriia;							unidentified_Spirochaetes	0.00503634	0.00321191	0.00088155	5.36596e-05
Cytophagia	0	0.0067561	1.07581e-05	1.07581e-05	0	6.45488e-05	0.000129098	0	0	0	3.22744e-05	3.22744e-05	0	7.53069e-05	0.00189343	3.22744e-05	3.22744e-05	0	0	0	0.000107581	7.53069e-05	6.45488e-05	0	3.22744e-05	5.37906e-05	0.00202253	5.37906e-05	3.22744e-05	4.30325e-05	5.37906e-05	0.0173313	0.000129098	5.37906e-05	0	5.37906e-05	0.000810445	k__Bacteria;p__Bacteroidetes;c__Cytophagia;							Sphingobacteriia	2.2997e-05	0.00159446	9.19879e-05	0.00295894
Epsilonproteobacteria	0	0	2.15163e-05	3.22744e-05	0.012856	2.15163e-05	5.37906e-05	0	0	8.6065e-05	0	0	0	3.22744e-05	0	0.000419567	0	0	0	0	0	0	1.07581e-05	4.30325e-05	8.6065e-05	3.22744e-05	6.45488e-05	2.15163e-05	1.07581e-05	3.22744e-05	0.0120599	2.15163e-05	4.30325e-05	9.68231e-05	0	0	0.000723484	k__Bacteria;p__Proteobacteria;c__Epsilonproteobacteria;							Coriobacteriia	0.000597921	0.00370251	7.66565e-05	0.000168644
Deltaproteobacteria	2.15163e-05	0.000139856	0	0.000882166	5.37906e-05	7.53069e-05	5.37906e-05	0.000333502	4.30325e-05	1.07581e-05	0.000182888	3.22744e-05	4.30325e-05	0.0013878	9.68231e-05	0.000129098	0	9.68231e-05	1.07581e-05	0.00363625	0.00017213	0.00552968	0.000129098	4.30325e-05	0.000161372	0.00707885	0.000107581	1.07581e-05	0	2.15163e-05	0	4.30325e-05	1.07581e-05	0	0	5.37906e-05	0.000571974	k__Bacteria;p__Proteobacteria;c__Deltaproteobacteria;							Thermoleophilia	4.59939e-05	0.00364885	0	1.53313e-05
Negativicutes	2.15163e-05	4.30325e-05	0.000731553	4.30325e-05	0.00311986	0.000129098	5.37906e-05	0.000129098	3.22744e-05	0.00194722	0.000204404	0.00034426	4.30325e-05	3.22744e-05	0	0	0	0	8.6065e-05	0	2.15163e-05	0	0	9.68231e-05	0.000247437	0.00630426	0.000107581	0.00276484	4.30325e-05	2.15163e-05	0.000623971	4.30325e-05	9.68231e-05	3.22744e-05	0.000150614	0.000107581	0.000489495	k__Bacteria;p__Firmicutes;c__Negativicutes;							Negativicutes	8.43222e-05	0.00216938	7.66565e-06	6.13252e-05
unidentified_SR1_(Absconditabacteria)	0	0	0	0	0	0	4.30325e-05	0	0	0	0	0	5.37906e-05	0	0	1.07581e-05	0	0	0	0	0	0	1.07581e-05	0	0	0	3.22744e-05	3.22744e-05	1.07581e-05	0	1.07581e-05	4.30325e-05	3.22744e-05	0.0118877	0	0	0.000337984	k__Bacteria;p__SR1_(Absconditabacteria);c__unidentified_SR1_(Absconditabacteria);							WCHB1-32	0	7.66565e-06	6.13252e-05	0.00166345
Blastocatellia	0	5.37906e-05	0	0	0	0	3.22744e-05	0	0	0	8.6065e-05	0	0	0	4.30325e-05	0	0	9.68231e-05	0	0	4.30325e-05	0.00599228	5.37906e-05	0	5.37906e-05	0	0	0	0	0	0	0	0	0	0	0	0.000179302	k__Bacteria;p__Acidobacteria;c__Blastocatellia;							Others	1.53313e-05	1.53313e-05	0	0
Others	0	2.22045e-16	0	0	0	0	2.22045e-16	0	0	0	3.33067e-16	0	3.33067e-16	0	4.44089e-16	0	0.000505632	0.00243134	0.00017213	0	4.44089e-16	3.33067e-16	0	2.22045e-16	1.11022e-16	0	1.11022e-16	0	1.11022e-16	1.11022e-16	0	1.11022e-16	2.22045e-16	0	0	1.11022e-16	8.63638e-05	Others
unidentified_Gemmatimonadetes	0	0	0	2.15163e-05	0.000462599	0	0	0	0	1.07581e-05	0	0	0	0	0	0	0	0	0	0	0	0	0	0	0	0	1.07581e-05	0	0	0	3.22744e-05	0	0	0	0	0	1.49418e-05	k__Bacteria;p__Gemmatimonadetes;c__unidentified_Gemmatimonadetes;
Ignavibacteria	0	0	0.000451841	0	0	1.07581e-05	0	0	0	0	0	0	0	0	0	0	0	0	0	0	0	0	0	0	0	1.07581e-05	0	0	1.07581e-05	0	0	0	0	0	0	0	1.34477e-05	k__Bacteria;p__Ignavibacteriae;c__Ignavibacteria;
Mollicutes	0	0	0	0	0	0	0	0	0	0	0	0	0	0	0	1.07581e-05	0	0	0	0	0	0	0	0	0	0	0	0	0	0	0	0	0	0	0	0	2.98837e-07	k__Bacteria;p__Tenericutes;c__Mollicutes;
Thermoleophilia	0	0	0	0	0	0	0	0	0	0	0	0	0	0	0	0	0	0	0	1.07581e-05	0	0	0	0	0	0	0	0	0	0	0	0	0	0	0	0	2.98837e-07	k__Bacteria;p__Actinobacteria;c__Thermoleophilia;
Deinococci	0	0	0	0	0	0	0	0	0	0	1.07581e-05	0	0	0	0	0	0	0	0	0	0	0	0	0	0	0	0	0	0	0	0	0	0	0	0	0	2.98837e-07	k__Bacteria;p__Deinococcus-Thermus;c__Deinococci;
Acidimicrobiia	0	0	0	0	0	0	0	0	0	0	0	0	0	0	0	0	0	0	0	0	0	0	0	0	0	0	0	0	0	0	0	0	0	0	0	0	0	k__Bacteria;p__Actinobacteria;c__Acidimicrobiia;
unidentified_Saccharibacteria	0	0	0	0	0	0	0	0	0	0	0	0	0	0	0	0	0	0	0	0	0	0	0	0	0	0	0	0	0	0	0	0	0	0	0	0	0	k__Bacteria;p__Saccharibacteria;c__unidentified_Saccharibacteria;
Synergistia	0	0	0	0	0	0	0	0	0	0	0	0	0	0	0	0	0	0	0	0	0	0	0	0	0	0	0	0	0	0	0	0	0	0	0	0	0	k__Bacteria;p__Synergistetes;c__Synergistia;
Subgroup_6	0	0	0	0	0	0	0	0	0	0	0	0	0	0	0	0	0	0	0	0	0	0	0	0	0	0	0	0	0	0	0	0	0	0	0	0	0	k__Bacteria;p__Acidobacteria;c__Subgroup_6;
[truncated: 2 more columns]
