# Supplementary material for: Comparison of Blood Bacterial Communities in Periodontal Health and Periodontal Disease
Source: Front Cell Infect Microbiol. 2021 Jan 5;10:577485. doi: 10.3389/fcimb.2020.577485 (PMC7813997; doi:10.3389/fcimb.2020.577485)
Supplement: Supplementary Table 4 — Relative Abundance (Order). [file Table_4.xlsx]

## Sheet: otu_table.o.relative
MolYsis (Order)																																																Total DNA (Order)
Taxonomy	WB.87.C	WB.90.C	WB.93.C	WB.94.C	WB.95.C	WB.96.C	WB.105.C	WB.110.C	WB.111.C	WB.113.C	WB.114.C	WB.115.C	WB.117.C	WB.118.C	WB.119.C	WB.121.C	WB.122.C	WB.123.C	WB.84.P	WB.88.P	WB.89.P	WB.91.P	WB.92.P	WB.97.P	WB.98.P	WB.99.P	WB.100.P	WB.101.P	WB.102.P	WB.103.P	WB.104.P	WB.106.P	WB.107.P	WB.108.C	WB.109.P	WB.112.P	Average	Tax_detail										Taxonomy	WBP85C
Lactobacillales	0.20874	0.250557	0.581305	0.437748	0.178574	0.736609	0.291287	0.434349	0.41776	0.215238	0.252515	0.297172	0.150259	0.166643	0.765602	0.234732	0.458102	0.273041	0.301238	0.247028	0.19015	0.348477	0.234775	0.31928	0.492927	0.242036	0.526868	0.248104	0.161426	0.37576	0.266543	0.447344	0.354512	0.299022	0.74017	0.230461	0.343788	k__Bacteria;p__Firmicutes;c__Bacilli;o__Lactobacillales;										Micrococcales	0.171833
Bacillales	0.150743	0.481501	0.119673	0.159027	0.280959	0.117801	0.379826	0.137941	0.312825	0.357245	0.318602	0.469087	0.319645	0.0540165	0.0327047	0.354426	0.178596	0.298269	0.396448	0.41379	0.371962	0.254268	0.385647	0.218089	0.185631	0.247663	0.127172	0.328435	0.543393	0.325745	0.301862	0.255473	0.362829	0.312728	0.0647532	0.379482	0.277729	k__Bacteria;p__Firmicutes;c__Bacilli;o__Bacillales;										Burkholderiales	0.0742879
Corynebacteriales	0.388809	0.0501329	0.0301658	0.0684324	0.113929	0.0140394	0.0212581	0.0318871	0.0589868	0.0423225	0.0483255	0.0487128	0.0577173	0.022463	0.00267877	0.0278528	0.0194399	0.0708207	0.0803202	0.0794488	0.0958657	0.125547	0.149936	0.0949082	0.0173636	0.0805353	0.0269168	0.104902	0.0475186	0.0867858	0.0132217	0.0686906	0.0347703	0.108603	0.00658397	0.0372339	0.0660313	k__Bacteria;p__Actinobacteria;c__unidentified_Actinobacteria;o__Corynebacteriales;										Lactobacillales	0.14669
Pasteurellales	0.00034426	0.00180737	0.0279604	0.219412	0.00145235	0.0138887	0.0779641	0.00601379	0.00274332	0.130657	0.021129	0.0196336	0.00892924	0.00488419	0.136908	0.0126838	0.0319731	0.0400202	0.0555334	0.00191495	0.0593956	0.0829774	0.00433552	0.0260885	0.0919605	0.00514238	0.108485	0.00683141	0.0105537	0.00108657	0.0558562	0.0152873	0.0452487	0.0703797	0.119802	0.0190419	0.0427313	k__Bacteria;p__Proteobacteria;c__Gammaproteobacteria;o__Pasteurellales;										Bacteroidales	0.144743
Bacteroidales	0.0321776	0.0623649	0.0551784	0.00421719	0.0161695	0.0292729	0.0240552	0.00584166	0.0531774	0.0386755	0.023528	0.0288533	0.112336	0.00653018	0.0298646	0.0353297	0.0444741	0.00818693	0.000107581	0.0603638	0.021484	0.00134477	0.0522952	0.0999968	0.0399987	0.0196443	0.0112315	0.0104031	0.064538	0.0249804	0.177649	0.0327692	0.0403322	0.04768	0.0198595	0.0663669	0.0389244	k__Bacteria;p__Bacteroidetes;c__Bacteroidia;o__Bacteroidales;										Pasteurellales	0.0988793
Burkholderiales	0.00258195	0.00388368	0.0019795	0.00676686	0.135359	0.00360397	0.00400202	0.178994	0.00974686	0.00602455	0.00270029	0.00222693	0.0501867	0.550762	0.00267877	0.00587394	0.00301228	6.45488e-05	0.0186653	0.00107581	0.00702506	0.000279711	0.00612137	0.00302303	0.00133401	0.0179015	0.00901531	0.0160081	0.0025174	0.0251633	0.015922	0.00523921	0.010231	0.00517466	0.00173206	0.0296709	0.0318485	k__Bacteria;p__Proteobacteria;c__Betaproteobacteria;o__Burkholderiales;										Bacillales	0.0709456
Micrococcales	0.0174066	0.00838058	0.0629135	0.0164814	0.0660441	0.011877	0.0545437	0.0161802	0.0369649	0.0223877	0.00464751	0.00509935	0.121438	0.0146741	0.00329199	0.0143621	0.0647209	0.0341678	0.000182888	0.0144589	0.0800512	0.00173206	0.0630319	0.0342754	0.0186438	0.0360397	0.0138887	0.0183641	0.0404075	0.0491001	0.0188913	0.0072187	0.015922	0.013964	0.00804708	0.0493475	0.0294208	k__Bacteria;p__Actinobacteria;c__unidentified_Actinobacteria;o__Micrococcales;										Rhizobiales	0.0268145
Pseudomonadales	0.0243349	0.0307575	0.0135768	0.0189128	0.0222048	0.0138242	0.0187084	0.00812238	0.000742311	0.0031091	0.0105537	0.00154917	0.0165245	0.00764903	0.00106505	0.100825	0.0723914	0.048971	0.0512409	0.0413757	0.0285521	0.00299076	0.00215163	0.078459	0.0358891	0.204404	0.0353835	0.0738438	0.00288318	0.00142007	0.0134261	0.0236356	0.0292621	0.000925199	0.00168903	0.0153626	0.0293532	k__Bacteria;p__Proteobacteria;c__Gammaproteobacteria;o__Pseudomonadales;										Corynebacteriales	0.0549781
Clostridiales	0.0817618	0.0222908	0.0101879	0.0144912	0.0497563	0.0105752	0.0185578	0.00382989	0.0140178	0.0218498	0.0579433	0.0279604	0.0105322	0.00798253	0.00233451	0.111605	0.00731553	0.0427635	0.0236679	0.019881	0.0122643	0.0859467	0.00774585	0.0144912	0.0172991	0.0133508	0.00901531	0.00705733	0.0183641	0.0286059	0.0430648	0.0559853	0.018902	0.014545	0.00387293	0.0375351	0.0263153	k__Bacteria;p__Firmicutes;c__Clostridia;o__Clostridiales;										Neisseriales	0.03297
Propionibacteriales	0.00570181	0.00889697	0.00301228	0.00762751	0.00491646	0.0054974	0.00916592	0.00892924	0.0102848	0.0524243	0.109776	0.0161802	0.0316719	0.00359321	0.00086065	0.0273902	0.0296709	0.0140824	0.0131787	0.0372661	0.0287887	0.0106828	0.0062935	0.0147064	0.00885394	0.0173959	0.0140178	0.0195905	0.00474433	0.0101126	0.0208062	0.0247975	0.00481964	0.0303594	0.00615365	0.0340279	0.0182299	k__Bacteria;p__Actinobacteria;c__unidentified_Actinobacteria;o__Propionibacteriales;										Enterobacteriales	0.00626284
Actinomycetales	0.0309942	0.00265726	0.042656	0.0057556	0.00763827	0.00263574	0.00351791	0.00405581	0.016234	0.0159328	0.0106183	0.00203329	0.0194399	0.00234527	0.0156638	0.00738007	0.0457973	0.0114789	0.0148355	0.00240982	0.0190096	0.0171915	0.00102202	0.0044969	0.00804708	0.019838	0.0546728	0.00934881	0.04995	0.000892924	0.00222693	0.00136628	0.0209568	0.0116403	0.00944563	0.00217314	0.0137877	k__Bacteria;p__Actinobacteria;c__unidentified_Actinobacteria;o__Actinomycetales;										Pseudomonadales	0.0193941
Rhizobiales	0	0.0123288	0.00387293	0.00258195	0.0136843	0.00155993	0.000957473	0.131862	0.00133401	0.00325971	0.0132863	0.00187191	0.00914441	0.000634729	0.000408809	0.000311986	0.000387293	0.000247437	3.22744e-05	0.00901531	0.000645488	0.000462599	0.000290469	0.0253784	0.00244209	0.0263251	0.000258195	0.0663669	0.00358246	0.000484116	0.00941336	0.00150614	0.00068852	0.000957473	0.00435704	0.00299076	0.00980364	k__Bacteria;p__Proteobacteria;c__Alphaproteobacteria;o__Rhizobiales;										Clostridiales	0.0160825
Fusobacteriales	7.53069e-05	0.00131249	0.0112422	0.00329199	0.000279711	0.0158682	0.000710036	0.000182888	0.000247437	0.000903683	0.0638172	0.000430325	0.00796101	0.000731553	0.000656246	0.00427098	0.00514238	0.0316827	0.0191602	0.0349962	0.0119523	0.000322744	0.0299183	0.00236679	0.00855271	0.000473358	0.000656246	0.0204404	0.00129098	0.0139533	0.0163416	0.0112745	0.0221725	0.000978989	0.00196874	0.00167827	0.00964735	k__Bacteria;p__Fusobacteria;c__Fusobacteriia;o__Fusobacteriales;										Rhodobacterales	0.0496274
Oceanospirillales	0.0203221	0.000441083	0.000591697	0.000613213	0.0209568	0.00245285	0.0300905	0.00488419	0.00418491	0.00627199	0.0161479	0.0316396	0.0110378	0.00100051	0.00068852	0.00797177	0.00903683	0.00504556	0.00164599	0.000796101	0.00899379	0.000527148	0.0281002	0.0129851	0.00221617	0.0018504	0.0228933	0.00034426	0.000548664	0.000753069	0.00182888	0.00145235	0.00109733	0.0271427	0.00147386	0.0267124	0.00874277	k__Bacteria;p__Proteobacteria;c__Gammaproteobacteria;o__Oceanospirillales;										Sphingomonadales	0.00325024
Enterobacteriales	0.0044969	0.00494874	0.00291545	0.0128344	0.00620744	0.00215163	0.0117586	0.00770282	0.0108765	0.00471206	0.00314137	0.00132325	0.00518542	0.000623971	0.000398051	0.0258518	0.00287242	0.0170516	0.0130281	0.0197304	0.0120061	0.00068852	0.00749841	0.00654094	0.018859	0.000892924	0.00622895	0.00963928	0.00178585	0.00111885	0.00160296	0.00577711	0.0208923	0.0210321	0.00149538	0.00753069	0.00781667	k__Bacteria;p__Proteobacteria;c__Gammaproteobacteria;o__Enterobacteriales;										Actinomycetales	0.00414712
Flavobacteriales	0	0.0199025	0.000139856	8.6065e-05	0.016503	0.000580939	0.00448614	0.00261422	0.0132433	0.0261853	0.00106505	0.000677762	0.0220542	0.00186116	0.000301228	0.00820845	0.00956397	0.00407733	1.07581e-05	0.000473358	0.00068852	0.0076813	6.45488e-05	0.00443235	0.000387293	0.0239261	6.45488e-05	0.0106505	0.000204404	0.000398051	0.000710036	0.0162663	0.000215163	0.000279711	0.000484116	0.0211612	0.00610135	k__Bacteria;p__Bacteroidetes;c__Flavobacteriia;o__Flavobacteriales;										Fusobacteriales	0.0156149
Neisseriales	1.07581e-05	0.000355018	0.0236679	0.00512087	0.00106505	0.00333502	0.000204404	0.0037008	0.0178155	0.000742311	0.00122643	0.000580939	0.0171592	0.00108657	0.000462599	0.00631502	0.00169978	0.0719719	0	0.00830527	0.000301228	0.0157714	0.000301228	0.000494874	0.00107581	0.00685293	0.000107581	0.000301228	0.000215163	0.0185255	0.000494874	0.000484116	0.000161372	0.000365776	0.000742311	0.00119415	0.00589485	k__Bacteria;p__Proteobacteria;c__Betaproteobacteria;o__Neisseriales;										Campylobacterales	0.00797995
Rhodobacterales	2.15163e-05	0.00034426	0.000398051	0.00356094	7.53069e-05	0.000398051	0.00322744	0.00034426	0.000247437	0.00186116	0.00465827	0.000268953	0.00169978	0.136876	0.000602455	0.000107581	0.000570181	0.000139856	0	0.000322744	0.0122965	0.00017213	8.6065e-05	0.000892924	0.0062182	8.6065e-05	0.000236679	0.0242918	0.000301228	0.000204404	0.000527148	0.000677762	0.000215163	0.000258195	0.000796101	0.005293	0.00578548	k__Bacteria;p__Proteobacteria;c__Alphaproteobacteria;o__Rhodobacterales;										Propionibacteriales	0.0143578
Sphingomonadales	0	0.00440007	0.000376534	0.000408809	0.00856347	0.000279711	0.00690672	0.00281863	0.000505632	0.00136628	0.00110809	0.0265941	0.000290469	0.00930578	0.000527148	0	0.000290469	7.53069e-05	2.15163e-05	0.00486267	0.000419567	0.000699278	0.000247437	0.00882166	0.000623971	0.00305531	0.00998354	0.00843437	0.0154487	0.00051639	0.00068852	0.0205265	0.00145235	0.000602455	0.00051639	0.000602455	0.00392612	k__Bacteria;p__Proteobacteria;c__Alphaproteobacteria;o__Sphingomonadales;										Flavobacteriales	0.00782663
Rubrobacterales	0	0.0011296	0.00378686	6.45488e-05	6.45488e-05	0.000473358	0.00545437	0.00114036	0.00126946	0.00942412	0.0158144	0.00206556	0.000247437	0.000258195	0.000107581	0.000150614	0.000462599	0.000419567	0	0.000753069	0.0113175	0.0409669	0.00601379	0.00100051	0.00160296	0.000333502	0.000828376	0.000161372	0.000107581	9.68231e-05	0.000333502	0.00086065	0.000322744	0.0137059	0.00114036	0.0118447	0.00371454	k__Bacteria;p__Actinobacteria;c__Rubrobacteria;o__Rubrobacterales;										Acidimicrobiales	3.06626e-05
Xanthomonadales	0.00137704	0.0123073	0.000279711	0.000279711	0.017923	0.0037761	0.000182888	0.000215163	0.000494874	0.000430325	0.000763827	0.00948867	0.00532527	0.000204404	0.000247437	0.012899	0.000559423	0.00778888	1.07581e-05	0.000462599	0.000215163	0.000408809	0.0121136	0.00051639	0.000882166	0.000720794	0.00819769	0.00275408	0.000129098	0.000376534	0.000774585	0.00103278	0.000365776	0.000548664	0.000258195	0.00572332	0.0030565	k__Bacteria;p__Proteobacteria;c__Gammaproteobacteria;o__Xanthomonadales;										Rhodospirillales	9.19879e-05
Spirochaetales	0	1.07581e-05	0.000849892	0.00868181	8.6065e-05	0.000150614	0.000365776	0.000182888	0.0113498	0.0181705	0.000441083	0.000268953	0.0131572	7.53069e-05	5.37906e-05	0.000118339	0.000290469	0.0141039	0	2.15163e-05	9.68231e-05	1.07581e-05	0.000118339	0.000333502	0.0141577	0.0113713	0.00934881	2.15163e-05	9.68231e-05	6.45488e-05	6.45488e-05	6.45488e-05	5.37906e-05	0.000215163	0.000107581	0.000247437	0.00290977	k__Bacteria;p__Spirochaetes;c__unidentified_Spirochaetes;o__Spirochaetales;										Myxococcales	7.66565e-05
Thermoanaerobacterales	0	0.00256043	1.07581e-05	0.000129098	0	0.000139856	0.000946715	0.00118339	0.00152765	0.0150936	0.0114251	0.00517466	0.000161372	0.000225921	4.30325e-05	6.45488e-05	0.000591697	0.000182888	0	0.00017213	0.000667004	0.000129098	0.000301228	0.000763827	0.000656246	8.6065e-05	0.000355018	9.68231e-05	0.00308758	7.53069e-05	0.000258195	0.000570181	0.00164599	0.00821921	0.00132325	0.00710036	0.00180468	k__Bacteria;p__Firmicutes;c__Clostridia;o__Thermoanaerobacterales;										Frankiales	0.0060252
Coriobacteriales	1.07581e-05	0.000182888	0.000182888	0.00017213	0.00017213	0.000398051	0.000645488	0	0	0.00086065	0	0	0.00017213	0.0012587	1.07581e-05	9.68231e-05	0.000387293	0	3.22744e-05	0.000268953	0.0137059	0.000225921	0.000150614	0.0214517	0.000311986	0.000258195	3.22744e-05	2.15163e-05	5.37906e-05	5.37906e-05	0.0073478	8.6065e-05	3.22744e-05	0	0	0.000107581	0.00135254	k__Bacteria;p__Actinobacteria;c__Coriobacteriia;o__Coriobacteriales;										Xanthomonadales	0.00935976
Sphingobacteriales	0	0	5.37906e-05	5.37906e-05	0	2.15163e-05	0.0234312	2.15163e-05	3.22744e-05	0.000161372	2.15163e-05	7.53069e-05	1.07581e-05	3.22744e-05	0.000892924	0	9.68231e-05	0	0.00101126	0	3.22744e-05	1.07581e-05	0	8.6065e-05	2.15163e-05	0.00534679	7.53069e-05	0.000118339	0.0126731	5.37906e-05	0.000182888	0.000129098	0.000107581	1.07581e-05	0.0019795	4.30325e-05	0.00129964	k__Bacteria;p__Bacteroidetes;c__Sphingobacteriia;o__Sphingobacteriales;										Spirochaetales	0.00503634
Hydrogenophilales	7.53069e-05	0.000107581	5.37906e-05	0.00149538	8.6065e-05	0.00017213	0.00147386	0.000204404	0.000161372	0.000430325	0.00507784	0.000150614	0.000139856	0.00146311	2.15163e-05	9.68231e-05	1.07581e-05	7.53069e-05	0.0056265	4.30325e-05	3.22744e-05	5.37906e-05	4.30325e-05	0.000182888	0.000462599	0.00407733	0.00017213	0.000742311	0.000182888	8.6065e-05	0.0114789	0.000387293	0.000150614	8.6065e-05	0.000129098	0.00034426	0.000988253	k__Bacteria;p__Proteobacteria;c__Betaproteobacteria;o__Hydrogenophilales;										Others	0.00610953
Rhodocyclales	0	5.37906e-05	0.000118339	0.00017213	0.000129098	0.000225921	0.000107581	0.000215163	0.000150614	0.000236679	0.000419567	0.000204404	1.07581e-05	0	6.45488e-05	0.000161372	0.000225921	0.00491646	1.07581e-05	1.07581e-05	0	2.15163e-05	0.000376534	0.000268953	0.0094026	0.00533603	0.000247437	7.53069e-05	0.00559423	7.53069e-05	9.68231e-05	0.000161372	0.000107581	0.00266802	0.000150614	0.000204404	0.000895016	k__Bacteria;p__Proteobacteria;c__Betaproteobacteria;o__Rhodocyclales;										Caulobacterales	0.0058259
Rhodospirillales	0	0	9.68231e-05	0.000182888	0.00605682	0.00320592	0.00500253	0.00110809	0.000193646	0.000419567	4.30325e-05	2.15163e-05	3.22744e-05	0.000118339	0	0.000150614	0.00678838	4.30325e-05	0	1.07581e-05	0.000204404	0	0.000118339	0.00444311	0.000215163	0.000236679	5.37906e-05	6.45488e-05	0.000107581	0.000150614	0.000118339	8.6065e-05	4.30325e-05	1.07581e-05	4.30325e-05	8.6065e-05	0.000818215	k__Bacteria;p__Proteobacteria;c__Alphaproteobacteria;o__Rhodospirillales;										Chromatiales	0
Cytophagales	0	0.0067561	1.07581e-05	1.07581e-05	0	6.45488e-05	0.000129098	0	0	3.22744e-05	3.22744e-05	0	7.53069e-05	0.00189343	3.22744e-05	3.22744e-05	0	0	0	0.000107581	7.53069e-05	6.45488e-05	0	3.22744e-05	5.37906e-05	0.00202253	5.37906e-05	3.22744e-05	4.30325e-05	5.37906e-05	0.0173313	0.000129098	5.37906e-05	0	0	5.37906e-05	0.000810445	k__Bacteria;p__Bacteroidetes;c__Cytophagia;o__Cytophagales;										Sphingobacteriales	2.2997e-05
Caulobacterales	0.0143621	0	0.000139856	0.000139856	2.15163e-05	0	6.45488e-05	0.00504556	6.45488e-05	0.000150614	9.68231e-05	0.000107581	0	0	2.15163e-05	0	0	0	0.000107581	1.07581e-05	0	0	0	2.15163e-05	3.22744e-05	0.00222693	2.15163e-05	0.00467978	0.000225921	2.15163e-05	3.22744e-05	5.37906e-05	5.37906e-05	3.22744e-05	0.000139856	0.000107581	0.000777275	k__Bacteria;p__Proteobacteria;c__Alphaproteobacteria;o__Caulobacterales;										Coriobacteriales	0.000597921
Campylobacterales	0	0	2.15163e-05	3.22744e-05	0.012856	2.15163e-05	5.37906e-05	0	8.6065e-05	0	0	0	3.22744e-05	0	0.000419567	0	0	0	0	0	0	1.07581e-05	4.30325e-05	8.6065e-05	3.22744e-05	6.45488e-05	2.15163e-05	1.07581e-05	3.22744e-05	0.0120599	2.15163e-05	4.30325e-05	9.68231e-05	0	0	0	0.000723484	k__Bacteria;p__Proteobacteria;c__Epsilonproteobacteria;o__Campylobacterales;										Solirubrobacterales	4.59939e-05
Cardiobacteriales	0.0155778	0	0	0	0	1.07581e-05	0	0.00017213	0.000182888	0.000484116	0.000301228	0.00017213	0	0	0	0	2.15163e-05	0	0.000161372	0	0	0	0.000311986	0	0	0	0.000301228	0	0	0	0	0	0	0.0070896	0.000193646	0.000333502	0.000703163	k__Bacteria;p__Proteobacteria;c__Gammaproteobacteria;o__Cardiobacteriales;										Aeromonadales	0
Aeromonadales	0	0.00939184	0	0	7.53069e-05	0	0.000204404	0	0.000161372	0	0.000118339	0	0	0	0	0	0	3.22744e-05	0	0.000129098	0.000150614	0.000139856	0	0	0.000107581	0	0.000118339	0.000129098	8.6065e-05	0.0123073	0.000161372	0.000247437	8.6065e-05	0	0	0	0.000656843	k__Bacteria;p__Proteobacteria;c__Gammaproteobacteria;o__Aeromonadales;										Thermoanaerobacterales	7.66565e-06
Frankiales	0	0	0.000215163	6.45488e-05	0.00854195	0.000161372	0.000258195	4.30325e-05	0.000204404	0.00216238	0.000182888	0.000107581	0	4.30325e-05	0	0	0.000129098	0	0	0	9.68231e-05	0	0.000118339	0.000387293	0.000139856	9.68231e-05	0.000139856	0.00751993	8.6065e-05	0.000150614	0.000150614	0.000129098	0.000139856	0.000107581	0.000355018	0.000118339	0.000606938	k__Bacteria;p__Actinobacteria;c__unidentified_Actinobacteria;o__Frankiales;										Selenomonadales	8.43222e-05
Others	2.22045e-16	0	0.00111885	2.15163e-05	4.30325e-05	0.00268953	3.22744e-05	3.33067e-16	0	9.68231e-05	1.11022e-16	2.22045e-16	0.00590621	0.000623971	0.000236679	0.000656246	0.00518542	0.000182888	0	0.000107581	3.22744e-05	0	2.22045e-16	9.68231e-05	6.45488e-05	3.22744e-05	0	2.15163e-05	1.11022e-16	2.22045e-16	0.000139856	3.33067e-16	1.07581e-05	0	3.22744e-05	0.000290469	0.000489495	Others										Oceanospirillales	0
Selenomonadales	2.15163e-05	4.30325e-05	0.000731553	4.30325e-05	0.00311986	0.000129098	5.37906e-05	3.22744e-05	0.00194722	0.000204404	0.00034426	4.30325e-05	3.22744e-05	0	0	0	0	8.6065e-05	0	2.15163e-05	0	0	9.68231e-05	0.000247437	0.00630426	0.000107581	0.00276484	4.30325e-05	2.15163e-05	0.000623971	4.30325e-05	9.68231e-05	3.22744e-05	0.000129098	0.000150614	0.000107581	0.000489495	k__Bacteria;p__Firmicutes;c__Negativicutes;o__Selenomonadales;										Pseudonocardiales	0
unidentified_SR1_(Absconditabacteria)	0	0	0	0	0	0	4.30325e-05	0	0	0	0	5.37906e-05	0	0	1.07581e-05	0	0	0	0	0	0	1.07581e-05	0	0	0	3.22744e-05	3.22744e-05	1.07581e-05	0	1.07581e-05	4.30325e-05	3.22744e-05	0.0118877	0	0	0	0.000337984	k__Bacteria;p__SR1_(Absconditabacteria);c__unidentified_SR1_(Absconditabacteria);o__unidentified_SR1_(Absconditabacteria);										Hydrogenophilales	0
Desulfuromonadales	2.15163e-05	0.000118339	0	0.000839134	3.22744e-05	2.15163e-05	5.37906e-05	4.30325e-05	0	0.000161372	0	0	0	4.30325e-05	0	0	9.68231e-05	0	0.00363625	0.000161372	0.00552968	0.000129098	1.07581e-05	0.000129098	2.15163e-05	5.37906e-05	0	0	2.15163e-05	0	0	0	0	0	0	0	0.000308997	k__Bacteria;p__Proteobacteria;c__Deltaproteobacteria;o__Desulfuromonadales;
Bifidobacteriales	0	0	1.07581e-05	2.15163e-05	4.30325e-05	0.00174282	0.000118339	0	8.6065e-05	0	0	0	1.07581e-05	0	0	0	0	0	0	3.22744e-05	0	0	0	1.07581e-05	1.07581e-05	1.07581e-05	5.37906e-05	4.30325e-05	2.15163e-05	0.00800405	8.6065e-05	3.22744e-05	6.45488e-05	0	0	4.30325e-05	0.000290171	k__Bacteria;p__Actinobacteria;c__unidentified_Actinobacteria;o__Bifidobacteriales;
Methylococcales	0	0	0	7.53069e-05	0	0	0.000118339	7.53069e-05	0	0	0	0	0	0	0	0	0	0	0	0	0	0	0	0	0	0	7.53069e-05	8.6065e-05	0.00775661	7.53069e-05	9.68231e-05	7.53069e-05	6.45488e-05	0	0	0	0.000236081	k__Bacteria;p__Proteobacteria;c__Gammaproteobacteria;o__Methylococcales;
Bdellovibrionales	0	2.15163e-05	0	4.30325e-05	2.15163e-05	2.15163e-05	0	0	0	0	3.22744e-05	0	0	0	0	0	0	1.07581e-05	0	0	0	0	2.15163e-05	3.22744e-05	0.00705733	5.37906e-05	0	0	0	0	0	1.07581e-05	0	0	0	0	0.000203508	k__Bacteria;p__Proteobacteria;c__Deltaproteobacteria;o__Bdellovibrionales;
Alteromonadales	1.07581e-05	0	5.37906e-05	5.37906e-05	0.00591697	9.68231e-05	0	0	6.45488e-05	0	0	0	0	0	0	0	0	0	4.30325e-05	0	0	0	6.45488e-05	0.000129098	0.000129098	0.000107581	0	0	0	2.15163e-05	0	0	0	0	0	0	0.000185876	k__Bacteria;p__Proteobacteria;c__Gammaproteobacteria;o__Alteromonadales;
Chromatiales	0	0	0	0	0	0.000182888	0	6.45488e-05	6.45488e-05	0.00017213	9.68231e-05	0.000129098	8.6065e-05	0	0	7.53069e-05	0	0	0	0.000118339	0	0	0	0	0	0	0	0	0	0	0.000118339	0	0	0.000129098	5.37906e-05	0.00532527	0.000183785	k__Bacteria;p__Proteobacteria;c__Gammaproteobacteria;o__Chromatiales;
unidentified_Blastocatellia	0	5.37906e-05	0	0	0	0	3.22744e-05	0	0	8.6065e-05	0	0	0	4.30325e-05	0	0	9.68231e-05	0	0	4.30325e-05	0.00599228	5.37906e-05	0	5.37906e-05	0	0	0	0	0	0	0	0	0	0	0	0	0.000179302	k__Bacteria;p__Acidobacteria;c__Blastocatellia;o__unidentified_Blastocatellia;
Oligoflexales	0	0	0	0	0	3.22744e-05	0	0	1.07581e-05	2.15163e-05	0	2.15163e-05	0.0013878	5.37906e-05	1.07581e-05	0	0	0	0	1.07581e-05	0	0	1.07581e-05	0	0	0	1.07581e-05	0	0	0	4.30325e-05	0	0	0.000333502	0	5.37906e-05	5.55836e-05	k__Bacteria;p__Proteobacteria;c__Deltaproteobacteria;o__Oligoflexales;
Gemmatimonadales	0	0	0	2.15163e-05	0.000462599	0	0	0	1.07581e-05	0	0	0	0	0	0	0	0	0	0	0	0	0	0	0	0	1.07581e-05	0	0	0	3.22744e-05	0	0	0	0	0	0	1.49418e-05	k__Bacteria;p__Gemmatimonadetes;c__unidentified_Gemmatimonadetes;o__Gemmatimonadales;
Ignavibacteriales	0	0	0.000451841	0	0	1.07581e-05	0	0	0	0	0	0	0	0	0	0	0	0	0	0	0	0	0	0	1.07581e-05	0	0	1.07581e-05	0	0	0	0	0	0	0	0	1.34477e-05	k__Bacteria;p__Ignavibacteriae;c__Ignavibacteria;o__Ignavibacteriales;
Rickettsiales	0	0	0	3.22744e-05	1.07581e-05	0	0	0	0	2.15163e-05	0	0	0	0	0	0	0	0	0	0	0	0	0.000225921	0	0	0	0	0	0	0	0	0	0	7.53069e-05	0	0	1.01605e-05	k__Bacteria;p__Proteobacteria;c__Alphaproteobacteria;o__Rickettsiales;
Myxococcales	0	0	0	0	0	0	0	0	0	0	0	2.15163e-05	0	0	0.000118339	0	0	0	0	0	0	0	0	0	0	0	0	0	0	0	0	0	0	0	0	0	3.88488e-06	k__Bacteria;p__Proteobacteria;c__Deltaproteobacteria;o__Myxococcales;
Methylophilales	0	0	0	0	0	0	0	0	0	0	0	0	0	0	0	0	0	0	3.22744e-05	0	0	0	0	0	0	0	0	0	0	0	0	0	0	0	0	0	8.9651e-07	k__Bacteria;p__Proteobacteria;c__Betaproteobacteria;o__Methylophilales;
Vibrionales	2.15163e-05	0	0	0	0	0	0	0	0	0	0	0	0	0	0	0	0	0	0	0	0	0	0	0	0	0	0	0	0	0	0	0	0	0	0	0	5.97674e-07	k__Bacteria;p__Proteobacteria;c__Gammaproteobacteria;o__Vibrionales;
Acholeplasmatales	0	0	0	0	0	0	0	0	0	0	0	0	0	0	1.07581e-05	0	0	0	0	0	0	0	0	0	0	0	0	0	0	0	0	0	0	0	0	0	2.98837e-07	k__Bacteria;p__Tenericutes;c__Mollicutes;o__Acholeplasmatales;
Solirubrobacterales	0	0	0	0	0	0	0	0	0	0	0	0	0	0	0	0	0	0	1.07581e-05	0	0	0	0	0	0	0	0	0	0	0	0	0	0	0	0	0	2.98837e-07	k__Bacteria;p__Actinobacteria;c__Thermoleophilia;o__Solirubrobacterales;
Thermales	0	0	0	0	0	0	0	0	0	1.07581e-05	0	0	0	0	0	0	0	0	0	0	0	0	0	0	0	0	0	0	0	0	0	0	0	0	0	0	2.98837e-07	k__Bacteria;p__Deinococcus-Thermus;c__Deinococci;o__Thermales;
Mycoplasmatales	0	0	0	0	0	0	0	0	0	0	0	0	0	0	0	0	0	0	0	0	0	0	0	0	0	0	0	0	0	0	0	0	0	0	0	0	0	k__Bacteria;p__Tenericutes;c__Mollicutes;o__Mycoplasmatales;
Desulfovibrionales	0	0	0	0	0	0	0	0	0	0	0	0	0	0	0	0	0	0	0	0	0	0	0	0	0	0	0	0	0	0	0	0	0	0	0	0	0	k__Bacteria;p__Proteobacteria;c__Deltaproteobacteria;o__Desulfovibrionales;
34P16	0	0	0	0	0	0	0	0	0	0	0	0	0	0	0	0	0	0	0	0	0	0	0	0	0	0	0	0	0	0	0	0	0	0	0	0	0	k__Bacteria;p__Proteobacteria;c__Gammaproteobacteria;o__34P16;
Cellvibrionales	0	0	0	0	0	0	0	0	0	0	0	0	0	0	0	0	0	0	0	0	0	0	0	0	0	0	0	0	0	0	0	0	0	0	0	0	0	k__Bacteria;p__Proteobacteria;c__Gammaproteobacteria;o__Cellvibrionales;
Pseudonocardiales	0	0	0	0	0	0	0	0	0	0	0	0	0	0	0	0	0	0	0	0	0	0	0	0	0	0	0	0	0	0	0	0	0	0	0	0	0	k__Bacteria;p__Actinobacteria;c__unidentified_Actinobacteria;o__Pseudonocardiales;
Acidimicrobiales	0	0	0	0	0	0	0	0	0	0	0	0	0	0	0	0	0	0	0	0	0	0	0	0	0	0	0	0	0	0	0	0	0	0	0	0	0	k__Bacteria;p__Actinobacteria;c__Acidimicrobiia;o__Acidimicrobiales;
Thiotrichales	0	0	0	0	0	0	0	0	0	0	0	0	0	0	0	0	0	0	0	0	0	0	0	0	0	0	0	0	0	0	0	0	0	0	0	0	0	k__Bacteria;p__Proteobacteria;c__Gammaproteobacteria;o__Thiotrichales;
unidentified_Alphaproteobacteria	0	0	0	0	0	0	0	0	0	0	0	0	0	0	0	0	0	0	0	0	0	0	0	0	0	0	0	0	0	0	0	0	0	0	0	0	0	k__Bacteria;p__Proteobacteria;c__Alphaproteobacteria;o__unidentified_Alphaproteobacteria;
Legionellales	0	0	0	0	0	0	0	0	0	0	0	0	0	0	0	0	0	0	0	0	0	0	0	0	0	0	0	0	0	0	0	0	0	0	0	0	0	k__Bacteria;p__Proteobacteria;c__Gammaproteobacteria;o__Legionellales;
SC-I-84	0	0	0	0	0	0	0	0	0	0	0	0	0	0	0	0	0	0	0	0	0	0	0	0	0	0	0	0	0	0	0	0	0	0	0	0	0	k__Bacteria;p__Proteobacteria;c__Betaproteobacteria;o__SC-I-84;
unidentified_Saccharibacteria	0	0	0	0	0	0	0	0	0	0	0	0	0	0	0	0	0	0	0	0	0	0	0	0	0	0	0	0	0	0	0	0	0	0	0	0	0	k__Bacteria;p__Saccharibacteria;c__unidentified_Saccharibacteria;o__unidentified_Saccharibacteria;
Acidithiobacillales	0	0	0	0	0	0	0	0	0	0	0	0	0	0	0	0	0	0	0	0	0	0	0	0	0	0	0	0	0	0	0	0	0	0	0	0	0	k__Bacteria;p__Proteobacteria;c__Gammaproteobacteria;o__Acidithiobacillales;
Gaiellales	0	0	0	0	0	0	0	0	0	0	0	0	0	0	0	0	0	0	0	0	0	0	0	0	0	0	0	0	0	0	0	0	0	0	0	0	0	k__Bacteria;p__Actinobacteria;c__Thermoleophilia;o__Gaiellales;
Synergistales	0	0	0	0	0	0	0	0	0	0	0	0	0	0	0	0	0	0	0	0	0	0	0	0	0	0	0	0	0	0	0	0	0	0	0	0	0	k__Bacteria;p__Synergistetes;c__Synergistia;o__Synergistales;
Streptosporangiales	0	0	0	0	0	0	0	0	0	0	0	0	0	0	0	0	0	0	0	0	0	0	0	0	0	0	0	0	0	0	0	0	0	0	0	0	0	k__Bacteria;p__Actinobacteria;c__unidentified_Actinobacteria;o__Streptosporangiales;
NB1-n	0	0	0	0	0	0	0	0	0	0	0	0	0	0	0	0	0	0	0	0	0	0	0	0	0	0	0	0	0	0	0	0	0	0	0	0	0	k__Bacteria;p__Tenericutes;c__Mollicutes;o__NB1-n;
Desulfobacterales	0	0	0	0	0	0	0	0	0	0	0	0	0	0	0	0	0	0	0	0	0	0	0	0	0	0	0	0	0	0	0	0	0	0	0	0	0	k__Bacteria;p__Proteobacteria;c__Deltaproteobacteria;o__Desulfobacterales;
Bradymonadales	0	0	0	0	0	0	0	0	0	0	0	0	0	0	0	0	0	0	0	0	0	0	0	0	0	0	0	0	0	0	0	0	0	0	0	0	0	k__Bacteria;p__Proteobacteria;c__Deltaproteobacteria;o__Bradymonadales;
Parvularculales	0	0	0	0	0	0	0	0	0	0	0	0	0	0	0	0	0	0	0	0	0	0	0	0	0	0	0	0	0	0	0	0	0	0	0	0	0	k__Bacteria;p__Proteobacteria;c__Alphaproteobacteria;o__Parvularculales;
[truncated: 5 more columns]
