# Supplementary material for: Comparison of Blood Bacterial Communities in Periodontal Health and Periodontal Disease
Source: Front Cell Infect Microbiol. 2021 Jan 5;10:577485. doi: 10.3389/fcimb.2020.577485 (PMC7813997; doi:10.3389/fcimb.2020.577485)
Supplement: Supplementary Table 5 — Relative Abundance (Family). [file Table_5.xlsx]

## Sheet: otu_table.f.relative
MolYsis (Family)																																															Total DNA (Family)
Taxonomy	WB.87.C	WB.90.C	WB.93.C	WB.94.C	WB.95.C	WB.96.C	WB.105.C	WB.108.C	WB.109.P	WB.110.C	WB.111.C	WB.113.C	WB.114.C	WB.115.C	WB.117.C	WB.118.C	WB.119.C	WB.121.C	WB.122.C	WB.123.C	WB.84.P	WB.88.P	WB.89.P	WB.91.P	WB.92.P	WB.97.P	WB.98.P	WB.99.P	WB.100.P	WB.101.P	WB.102.P	WB.103.P	WB.104.P	WB.106.P	WB.107.P	WB.112.P	Average	Tax_detail									Taxonomy	WBP85C	WBP90C
Streptococcaceae	0.195163	0.23655	0.551763	0.201747	0.117608	0.653459	0.26877	0.281626	0.696933	0.394479	0.333254	0.175422	0.208675	0.277022	0.146902	0.158241	0.725302	0.222134	0.446451	0.253763	0.26238	0.206169	0.163061	0.278334	0.195766	0.305563	0.36285	0.203544	0.441912	0.203286	0.146579	0.302088	0.246103	0.407496	0.335664	0.211311	0.300483	k__Bacteria;p__Firmicutes;c__Bacilli;o__Lactobacillales;f__Streptococcaceae;									Comamonadaceae	0.073092	0.156349
Staphylococcaceae	0.11353	0.407453	0.103041	0.124321	0.199714	0.0579648	0.317935	0.165331	0.0332426	0.114413	0.250503	0.203479	0.17213	0.344421	0.201016	0.0360828	0.0106183	0.304896	0.135337	0.214915	0.307844	0.352748	0.269986	0.135768	0.33716	0.132013	0.109561	0.17142	0.0971351	0.295203	0.434262	0.264575	0.234656	0.201521	0.290846	0.27785	0.206191	k__Bacteria;p__Firmicutes;c__Bacilli;o__Bacillales;f__Staphylococcaceae;									Micrococcaceae	0.15641	0.111834
Corynebacteriaceae	0.38187	0.049993	0.0298215	0.0680129	0.113746	0.0135983	0.021129	0.108399	0.00594924	0.0261315	0.0589007	0.0419782	0.0480996	0.0482502	0.0575667	0.0213118	0.00246361	0.0277667	0.0193969	0.0708207	0.0802341	0.0606758	0.0955644	0.12516	0.149785	0.0917991	0.0171269	0.053597	0.026863	0.0984691	0.0472067	0.0867428	0.0130388	0.0686261	0.0345443	0.0368143	0.0639293	k__Bacteria;p__Actinobacteria;c__unidentified_Actinobacteria;o__Corynebacteriales;f__Corynebacteriaceae;									Streptococcaceae	0.132056	0.10193
Bacillaceae	0.0370295	0.0577604	0.00832679	0.0284768	0.0750702	0.0217207	0.0518004	0.106699	0.0137059	0.0212043	0.0593956	0.133777	0.124665	0.118027	0.0896475	0.0162986	0.00551892	0.0437103	0.0412897	0.0639033	0.0674642	0.0566953	0.100599	0.117274	0.0420428	0.0761783	0.0611599	0.0664422	0.025529	0.0261853	0.0918636	0.0600734	0.0425807	0.0392349	0.0647316	0.0858498	0.0594981	k__Bacteria;p__Firmicutes;c__Bacilli;o__Bacillales;f__Bacillaceae;									Pasteurellaceae	0.0988793	0.107013
Pasteurellaceae	0.00034426	0.00180737	0.0279604	0.219412	0.00145235	0.0138887	0.0779641	0.0703797	0.119802	0.00601379	0.00274332	0.130657	0.021129	0.0196336	0.00892924	0.00488419	0.136908	0.0126838	0.0319731	0.0400202	0.0555334	0.00191495	0.0593956	0.0829774	0.00433552	0.0260885	0.0919605	0.00514238	0.108485	0.00683141	0.0105537	0.00108657	0.0558562	0.0152873	0.0452487	0.0190419	0.0427313	k__Bacteria;p__Proteobacteria;c__Gammaproteobacteria;o__Pasteurellales;f__Pasteurellaceae;									Prevotellaceae	0.11707	0.0625057
Others	0.000107581	0.00210859	0.0293266	0.22988	0.0349854	0.0811378	0.0130388	0.00974686	0.0402246	0.0348994	0.0645272	0.0302626	0.0117801	0.0116403	0.00883242	0.0072187	0.0398911	0.0126193	0.0117909	0.0108227	0.0174712	0.0197842	0.010629	0.0372124	0.0344583	0.0140824	0.120566	0.0162878	0.0791153	0.0497025	0.0135552	0.0570396	0.0113498	0.0216131	0.00526072	0.0112853	0.0334515	Others									Methylobacteriaceae	0.022675	0.0347561
Prevotellaceae	0.0321776	0.0489602	0.0527901	0.000903683	0.015524	0.0148677	0.0204835	0.0475832	0.0143513	0.00458296	0.0222693	0.0375136	0.0223124	0.0280895	0.0899272	0.0034426	0.0228395	0.0252493	0.0418168	0.00800405	0.000107581	0.0249481	0.0186976	0.000903683	0.0522199	0.0941444	0.0165568	0.0191817	0.0110809	0.00984368	0.0443988	0.0169225	0.175799	0.0124902	0.02313	0.0414295	0.0309873	k__Bacteria;p__Bacteroidetes;c__Bacteroidia;o__Bacteroidales;f__Prevotellaceae;									Corynebacteriaceae	0.048102	0.0667985
Moraxellaceae	0.00887545	0.0237755	0.011253	0.00419567	0.0219788	0.0131249	0.0174497	0.000796101	0.00135552	0.00786419	0.000656246	0.00240982	0.0075522	0.00130173	0.0163524	0.00748766	0.00086065	0.097318	0.0590298	0.0376857	0.0406442	0.0198272	0.0015922	0.00219466	0.00193646	0.077437	0.0348025	0.19029	0.0352651	0.0606866	0.00257119	0.00130173	0.0130926	0.0230869	0.0289609	0.0142545	0.0247019	k__Bacteria;p__Proteobacteria;c__Gammaproteobacteria;o__Pseudomonadales;f__Moraxellaceae;									Neisseriaceae	0.03297	0.0500491
Micrococcaceae	0.00661625	0.00785343	0.06031	0.00548664	0.0650759	0.00863877	0.0486482	0.0135014	0.00712188	0.00775661	0.036384	0.0206126	0.00415264	0.00451841	0.0447538	0.0104677	0.00202253	0.00417415	0.0606973	0.0268092	9.68231e-05	0.0114574	0.0308328	0.000828376	0.050972	0.0270567	0.0175573	0.00234527	0.0137489	0.0180737	0.0399449	0.0370725	0.0168903	0.00704657	0.0155455	0.043054	0.0216146	k__Bacteria;p__Actinobacteria;c__unidentified_Actinobacteria;o__Micrococcales;f__Micrococcaceae;									Staphylococcaceae	0.0368795	0.0365805
Oxalobacteraceae	0.0025174	0	0.00135552	0.00420643	0.000473358	0.00140931	0.0013878	0.00376534	0.000441083	0.000968231	0.00691747	0.00307682	0.000548664	0.000387293	0.0364808	0.547083	0.00239906	0.00538982	0.0019257	3.22744e-05	0.00935957	0.000537906	0.000903683	6.45488e-05	0.00547589	0.00160296	0.00017213	0.000258195	0.000441083	0.0084774	0.000387293	0.000419567	0.00769206	0.000236679	0.00965004	0.0110378	0.0188189	k__Bacteria;p__Proteobacteria;c__Betaproteobacteria;o__Burkholderiales;f__Oxalobacteraceae;									Enterobacteriaceae	0.00626284	0.0180603
Family_XI	0.0768453	0.0149215	0.0056265	0.00124794	0.0246899	0.00649791	0.017568	0.00193646	0.00219466	0.00193646	0.0044969	0.0101987	0.0520693	0.0256151	0.000925199	0.00514238	0.000968231	0.0915732	0.00527148	0.0330382	0.0236356	0.0015922	0.00137704	0.0465612	0.00427098	0.0119738	0.00533603	0.0111454	0.00812238	0.00676686	0.0110486	0.0278635	0.0419029	0.043409	0.0184287	0.0255505	0.0186597	k__Bacteria;p__Firmicutes;c__Clostridia;o__Clostridiales;f__Family_XI;									Porphyromonadaceae	0.0273971	0.0257873
Propionibacteriaceae	0.00570181	0.00889697	0.00286166	0.0075522	0.00484116	0.00537906	0.00909062	0.0303594	0.00604607	0.00892924	0.0102848	0.0524136	0.109776	0.0159973	0.0316719	0.00359321	0.000731553	0.0273902	0.0296709	0.0140824	0.0131787	0.0372661	0.0287887	0.010543	0.00620744	0.0145235	0.00876787	0.00813314	0.0139533	0.0156853	0.00471206	0.0100588	0.0207309	0.0247544	0.00465827	0.0340279	0.0178128	k__Bacteria;p__Actinobacteria;c__unidentified_Actinobacteria;o__Propionibacteriales;f__Propionibacteriaceae;									Bacillaceae	0.0327707	0.0252507
Actinomycetaceae	0.0309942	0.00265726	0.042656	0.0057556	0.00763827	0.00263574	0.00351791	0.0116403	0.00944563	0.00405581	0.016234	0.0159328	0.0106183	0.00203329	0.0194399	0.00234527	0.0156638	0.00738007	0.0457973	0.0114789	0.0148355	0.00240982	0.0190096	0.0171915	0.00102202	0.0044969	0.00804708	0.019838	0.0546728	0.00934881	0.04995	0.000892924	0.00222693	0.00136628	0.0209568	0.00217314	0.0137877	k__Bacteria;p__Actinobacteria;c__unidentified_Actinobacteria;o__Actinomycetales;f__Actinomycetaceae;									Moraxellaceae	0.0110232	0.0238249
Comamonadaceae	6.45488e-05	0.00382989	0.000570181	0.00256043	0.134885	0.00216238	0.000710036	0.00140931	0.0012587	0.178025	0.00282939	0.00275408	0.00215163	0.00183964	0.0123396	0.00242058	0.000258195	0.000462599	0.000968231	3.22744e-05	0.00930578	0.000387293	9.68231e-05	0.000150614	0.000645488	0.00132325	0.00116188	0.0176433	0.00854195	0.00386217	0.00207632	0.0247007	0.00810087	0.00494874	0.00051639	0.0185685	0.012599	k__Bacteria;p__Proteobacteria;c__Betaproteobacteria;o__Burkholderiales;f__Comamonadaceae;									Others	0.0130393	0.0104636
Lactobacillaceae	0.0130819	0.0113283	0.00163524	0.0062182	0.0375459	0.00476585	0.0109625	0.0078104	0.00342108	0.00248513	0.0201607	0.017213	0.0323282	0.00841285	0.00034426	0.00195798	0.00034426	0.000484116	0.0017213	0.00861726	0.0102848	0.00783192	0.0131679	0.0155455	0.00462599	0.00349639	0.00983293	0.0222263	0.00590621	0.00358246	0.00115112	0.00711112	0.00913365	0.018192	0.0134477	0.00807935	0.00956816	k__Bacteria;p__Firmicutes;c__Bacilli;o__Lactobacillales;f__Lactobacillaceae;									Rhodobacteraceae	0.0496274	0.00261399
Halomonadaceae	0.0203113	0.000441083	0.000591697	0.000613213	0.0209568	0.00245285	0.0300905	0.0271427	0.00147386	0.00488419	0.00418491	0.00627199	0.0161479	0.0316396	0.0110378	0.00100051	0.00068852	0.00797177	0.00903683	0.00504556	0.00160296	0.000796101	0.00899379	0.000527148	0.0281002	0.0129851	0.00221617	0.0018504	0.0228933	0.00034426	0.000548664	0.000753069	0.00182888	0.00145235	0.00109733	0.0267124	0.00874128	k__Bacteria;p__Proteobacteria;c__Gammaproteobacteria;o__Oceanospirillales;f__Halomonadaceae;									Actinomycetaceae	0.00414712	0.00650814
Methylobacteriaceae	0	0.0117694	0.00353942	0.00228072	0.000139856	0.000978989	0.000634729	0.00068852	0.00391596	0.131249	0.000753069	0.00201177	0.00181812	0.00149538	0.00901531	0.000494874	0.000408809	0.000247437	0.000150614	2.15163e-05	1.07581e-05	0.000473358	0.000322744	0.00034426	0.000129098	0.00996202	0.000774585	0.0258948	0.000161372	0.0642906	0.00348563	0.000215163	0.000763827	0.000634729	0.000602455	0.00200101	0.00782444	k__Bacteria;p__Proteobacteria;c__Alphaproteobacteria;o__Rhizobiales;f__Methylobacteriaceae;									Sphingomonadaceae	0.00314292	0.025059
Enterobacteriaceae	0.0044969	0.00494874	0.00291545	0.0128344	0.00620744	0.00215163	0.0117586	0.0210321	0.00149538	0.00770282	0.0108765	0.00471206	0.00314137	0.00132325	0.00518542	0.000623971	0.000398051	0.0258518	0.00287242	0.0170516	0.0130281	0.0197304	0.0120061	0.00068852	0.00749841	0.00654094	0.018859	0.000892924	0.00622895	0.00963928	0.00178585	0.00111885	0.00160296	0.00577711	0.0208923	0.00753069	0.00781667	k__Bacteria;p__Proteobacteria;c__Gammaproteobacteria;o__Enterobacteriales;f__Enterobacteriaceae;									Campylobacteraceae	0.00797995	0.000789562
Porphyromonadaceae	0	0.0134046	0.0023883	0.0033135	0.000645488	0.0144051	0.00355018	9.68231e-05	0.00550816	0.0012587	0.0309081	0.00116188	0.00121567	0.000763827	0.0224092	0.00308758	0.00700354	0.0100804	0.00265726	0.000182888	0	0.0354157	0.00278635	0.000441083	7.53069e-05	0.00585242	0.023442	0.000430325	0.000129098	0.00051639	0.0201392	0.00803632	0.00182888	0.0202683	0.0111669	0.0249373	0.00776408	k__Bacteria;p__Bacteroidetes;c__Bacteroidia;o__Bacteroidales;f__Porphyromonadaceae;									Fusobacteriaceae	0.0134992	0.0110692
Fusobacteriaceae	7.53069e-05	0.0012587	0.00874636	0.00327047	0.000150614	0.0158037	0.000430325	0.000935957	0.00120491	0.000182888	0.000182888	0.00086065	0.0636989	0.00034426	0.00796101	0.000731553	0.00051639	0.00415264	0.000258195	0.012942	0.0191495	0.0349962	0.0115865	0.000268953	0.0188052	0.00225921	0.00828376	0.000301228	0.000430325	0.0201285	0.00117264	9.68231e-05	0.0161157	0.00129098	0.000150614	0.00166751	0.00723364	k__Bacteria;p__Fusobacteria;c__Fusobacteriia;o__Fusobacteriales;f__Fusobacteriaceae;									Pseudomonadaceae	0.0083709	0.00325024
Family_XI	8.6065e-05	0.00352867	0.00798253	0.00604607	0.000731553	0.0352974	0.000978989	0.0393855	0.0167289	0.0015169	0.00154917	0.00349639	0.00279711	0.002313	0.0170839	0.000710036	0.0158252	0.000591697	0.000129098	3.22744e-05	0.0118555	0.00350715	0.000268953	0.00051639	0.00209783	0.00834831	0.00518542	0.00522845	0.00405581	0.002313	0.016944	0.00051639	0.0232268	0.000882166	0.00648715	0.00486267	0.00703073	k__Bacteria;p__Firmicutes;c__Bacilli;o__Bacillales;f__Family_XI;									Propionibacteriaceae	0.0140358	0.00725171
Flavobacteriaceae	0	0.0199025	0.000139856	8.6065e-05	0.016503	0.000580939	0.00448614	0.000279711	0.000484116	0.00261422	0.0132433	0.0261853	0.00106505	0.000677762	0.0220542	0.00186116	0.000301228	0.00820845	0.00956397	0.00407733	1.07581e-05	0.000473358	0.00068852	0.0076813	6.45488e-05	0.00443235	0.000387293	0.0239261	6.45488e-05	0.0106505	0.000204404	0.000398051	0.000710036	0.0162663	0.000215163	0.0211612	0.00610135	k__Bacteria;p__Bacteroidetes;c__Flavobacteriia;o__Flavobacteriales;f__Flavobacteriaceae;									Flavobacteriaceae	0.00782663	0.0030586
Neisseriaceae	1.07581e-05	0.000355018	0.0236679	0.00512087	0.00106505	0.00333502	0.000204404	0.000365776	0.000742311	0.0037008	0.0178155	0.000742311	0.00122643	0.000580939	0.0171592	0.00108657	0.000462599	0.00631502	0.00169978	0.0719719	0	0.00830527	0.000301228	0.0157714	0.000301228	0.000494874	0.00107581	0.00685293	0.000107581	0.000301228	0.000215163	0.0185255	0.000494874	0.000484116	0.000161372	0.00119415	0.00589485	k__Bacteria;p__Proteobacteria;c__Betaproteobacteria;o__Neisseriales;f__Neisseriaceae;									Oxalobacteraceae	0.00114218	0.0259482
Rhodobacteraceae	2.15163e-05	0.00034426	0.000398051	0.00356094	7.53069e-05	0.000398051	0.00322744	0.000258195	0.000796101	0.00034426	0.000247437	0.00186116	0.00465827	0.000268953	0.00169978	0.136876	0.000602455	0.000107581	0.000570181	0.000139856	0	0.000322744	0.0122965	0.00017213	8.6065e-05	0.000892924	0.0062182	8.6065e-05	0.000236679	0.0242918	0.000301228	0.000204404	0.000527148	0.000677762	0.000215163	0.005293	0.00578548	k__Bacteria;p__Proteobacteria;c__Alphaproteobacteria;o__Rhodobacterales;f__Rhodobacteraceae;									Lactobacillaceae	0.00695275	0.000659246
Pseudomonadaceae	0.0154594	0.00698202	0.00232376	0.0147171	0.000225921	0.000699278	0.0012587	0.000129098	0.000333502	0.000258195	8.6065e-05	0.000699278	0.00300152	0.000247437	0.00017213	0.000161372	0.000204404	0.00350715	0.0133616	0.0112853	0.0105968	0.0215485	0.0269599	0.000796101	0.000215163	0.00102202	0.00108657	0.0141147	0.000118339	0.0131572	0.000311986	0.000118339	0.000333502	0.000548664	0.000301228	0.00110809	0.00465139	k__Bacteria;p__Proteobacteria;c__Gammaproteobacteria;o__Pseudomonadales;f__Pseudomonadaceae;									Dermabacteraceae	4.59939e-05	0.00121117
Rubrobacteriaceae	0	0.0011296	0.00378686	6.45488e-05	6.45488e-05	0.000473358	0.00545437	0.0137059	0.00114036	0.00114036	0.00126946	0.00942412	0.0158144	0.00206556	0.000247437	0.000258195	0.000107581	0.000150614	0.000462599	0.000419567	0	0.000753069	0.0113175	0.0409669	0.00601379	0.00100051	0.00160296	0.000333502	0.000828376	0.000161372	0.000107581	9.68231e-05	0.000333502	0.00086065	0.000322744	0.0118447	0.00371454	k__Bacteria;p__Actinobacteria;c__Rubrobacteria;o__Rubrobacterales;f__Rubrobacteriaceae;									Brevibacteriaceae	0.00264465	0.00259866
Sphingomonadaceae	0	0.00440007	0.000236679	0.000311986	8.6065e-05	0.000139856	0.00565877	0.000602455	0.000505632	0.00281863	0.000355018	0.00124794	0.00110809	0.0265941	0.000290469	0.0092735	0.000527148	0	0.000247437	7.53069e-05	2.15163e-05	0.00486267	0.000355018	0.000699278	0.000150614	0.00541134	0.000441083	0.00291545	0.00996202	0.00770282	0.0154272	0.000365776	0.000667004	0.020505	0.00142007	0.000602455	0.00349968	k__Bacteria;p__Proteobacteria;c__Alphaproteobacteria;o__Sphingomonadales;f__Sphingomonadaceae;									Family_XVI	0	0
Paenibacillaceae	3.22744e-05	0.0126193	0.000161372	8.6065e-05	0.000139856	0.00103278	0.00842361	0.000570181	0.000484116	0.000398051	0.000656246	0.0042387	0.0146311	0.000946715	0.0118124	0.000742311	0.000527148	0.00117264	0.00142007	0.0193001	0.00341033	0.000763827	0.000613213	0.000301228	0.000118339	0.000720794	0.0091982	0.00427098	0.000311986	0.000193646	0.000279711	0.000430325	0.00123718	0.0135337	0.000527148	0.00990823	0.00347816	k__Bacteria;p__Firmicutes;c__Bacilli;o__Bacillales;f__Paenibacillaceae;									Phyllobacteriaceae	0	0.000398614
Lachnospiraceae	1.07581e-05	0.00490571	0.0019257	0.0131034	0.0192893	0.000914441	2.15163e-05	0.000225921	0.000580939	0.000731553	0.0045722	0.000419567	0.000753069	0.000462599	0.000322744	0.00188267	0.00086065	0.00971459	0.000613213	0.00786419	0	0.0171915	0.000634729	0.0173206	0.00273256	0.000667004	0.0111454	0.000742311	5.37906e-05	8.6065e-05	7.53069e-05	0.000279711	0.000150614	0.000161372	8.6065e-05	0.00068852	0.0033664	k__Bacteria;p__Firmicutes;c__Clostridia;o__Clostridiales;f__Lachnospiraceae;									Lachnospiraceae	0.0017631	0.0119738
Xanthomonadaceae	0.00137704	0.0123073	0.000268953	0.000236679	0.0133401	0.0037008	0.000182888	0.000548664	0.000258195	0.000215163	0.000430325	0.000430325	0.000763827	0.00948867	0.00532527	0.000204404	0.000247437	0.012899	0.000559423	0.00778888	1.07581e-05	0.000462599	0.000215163	0.000408809	0.0120706	0.000462599	0.000796101	0.00068852	0.00819769	0.00275408	0.000129098	0.000333502	0.000774585	0.00103278	0.000365776	0.00572332	0.00291665	k__Bacteria;p__Proteobacteria;c__Gammaproteobacteria;o__Xanthomonadales;f__Xanthomonadaceae;									Acidimicrobiaceae	3.06626e-05	0.000199307
Spirochaetaceae	0	1.07581e-05	0.000839134	0.00533603	8.6065e-05	0.000139856	0.000365776	0.000215163	0.000107581	0.000161372	0.0113498	0.0181705	0.000441083	0.000268953	0.0131572	7.53069e-05	5.37906e-05	0.000118339	0.000290469	0.0141039	0	2.15163e-05	9.68231e-05	1.07581e-05	0.000118339	0.000290469	0.0141254	0.0113283	0.00934881	2.15163e-05	5.37906e-05	6.45488e-05	6.45488e-05	6.45488e-05	5.37906e-05	0.000247437	0.00281116	k__Bacteria;p__Spirochaetes;c__unidentified_Spirochaetes;o__Spirochaetales;f__Spirochaetaceae;									Family_XI	0.00123417	0.00197007
Microbacteriaceae	0.0106398	0.000225921	0.00130173	0.000107581	0.000580939	0.00148462	0.00034426	8.6065e-05	0.000215163	0.000989748	0.000333502	0.000559423	0.000118339	0.000129098	0.0237109	0.000796101	0.000548664	0.00623971	0.000484116	7.53069e-05	7.53069e-05	0.0010543	0.0208385	0.000398051	9.68231e-05	0.000355018	0.000129098	0.00849892	6.45488e-05	0.00017213	0.000129098	0.0119953	0.000914441	9.68231e-05	0.000193646	0.00443235	0.00273376	k__Bacteria;p__Actinobacteria;c__unidentified_Actinobacteria;o__Micrococcales;f__Microbacteriaceae;									Nocardioidaceae	0.000321958	0.00779597
Leptotrichiaceae	0	5.37906e-05	0.00249589	2.15163e-05	0.000129098	6.45488e-05	0.000279711	4.30325e-05	0.000763827	0	6.45488e-05	4.30325e-05	0.000118339	8.6065e-05	0	0	0.000139856	0.000118339	0.00488419	0.0187407	1.07581e-05	0	0.000365776	5.37906e-05	0.0111131	0.000107581	0.000268953	0.00017213	0.000225921	0.000311986	0.000118339	0.0138565	0.000225921	0.00998354	0.0220219	1.07581e-05	0.0024137	k__Bacteria;p__Fusobacteria;c__Fusobacteriia;o__Fusobacteriales;f__Leptotrichiaceae;									Bradyrhizobiaceae	0.00413945	0.00387882
Clostridiaceae_1	0.00489495	0.00201177	5.37906e-05	3.22744e-05	0.000225921	0.000473358	0.000634729	0.0121674	0.000946715	0.000946715	0.00372231	0.0104354	0.00300152	0.00150614	0.00444311	0.000656246	0.00017213	0.00633654	0.00124794	0.00167827	2.15163e-05	0.000333502	0.000677762	3.22744e-05	0.000645488	0.00158144	0.000247437	0.00116188	0.000656246	1.07581e-05	0	0.00017213	0.000290469	0.000139856	3.22744e-05	0.0027756	0.00178794	k__Bacteria;p__Firmicutes;c__Clostridia;o__Clostridiales;f__Clostridiaceae_1;									Family_XI	0.00878484	0.000567258
Brevibacteriaceae	3.22744e-05	0.000236679	0.000139856	0.000118339	0.00017213	0.000322744	0.000182888	0.000129098	0	0	0	0.000537906	0.000139856	0	7.53069e-05	0.00017213	9.68231e-05	0.00347487	0.000892924	0.00728325	0	0.000258195	0.0193216	0.000247437	0.0117801	0.0060891	0.000623971	0.000182888	4.30325e-05	0	0	0	5.37906e-05	4.30325e-05	0	7.53069e-05	0.0014646	k__Bacteria;p__Actinobacteria;c__unidentified_Actinobacteria;o__Micrococcales;f__Brevibacteriaceae;									Dermacoccaceae	0.00814093	0.00040628
Nocardiaceae	0.00693899	0	0.000333502	0.000408809	0.000182888	0.000290469	0.000118339	0.000204404	0.000634729	0.0057556	8.6065e-05	0.000311986	0.000225921	0.000430325	0	4.30325e-05	9.68231e-05	0	2.15163e-05	0	6.45488e-05	0	6.45488e-05	0.000161372	0.000150614	0.00306607	0.000225921	0.0251525	5.37906e-05	0.00643336	0.000311986	4.30325e-05	0.000107581	6.45488e-05	0.000225921	0.000193646	0.00145563	k__Bacteria;p__Actinobacteria;c__unidentified_Actinobacteria;o__Corynebacteriales;f__Nocardiaceae;									Spirochaetaceae	0.00503634	0.00321191
Coriobacteriaceae	1.07581e-05	0.000182888	0.000182888	0.00017213	0.00017213	0.000398051	0.000645488	0	0	0	0	0.00086065	0	0	0.00017213	0.0012587	1.07581e-05	9.68231e-05	0.000387293	0	3.22744e-05	0.000268953	0.0137059	0.000225921	0.000150614	0.0214517	0.000311986	0.000258195	3.22744e-05	2.15163e-05	5.37906e-05	5.37906e-05	0.0073478	8.6065e-05	3.22744e-05	0.000107581	0.00135254	k__Bacteria;p__Actinobacteria;c__Coriobacteriia;o__Coriobacteriales;f__Coriobacteriaceae;									Leptotrichiaceae	0.00211572	0.00317358
Sphingobacteriaceae	0	0	5.37906e-05	5.37906e-05	0	2.15163e-05	0.0234312	1.07581e-05	0.00186116	2.15163e-05	3.22744e-05	0.000161372	2.15163e-05	7.53069e-05	1.07581e-05	3.22744e-05	0.000892924	0	9.68231e-05	0	0.00101126	0	3.22744e-05	1.07581e-05	0	8.6065e-05	2.15163e-05	0.00534679	7.53069e-05	0.000107581	0.0126731	5.37906e-05	0.000182888	0.000129098	0.000107581	3.22744e-05	0.00129576	k__Bacteria;p__Bacteroidetes;c__Sphingobacteriia;o__Sphingobacteriales;f__Sphingobacteriaceae;									Ruminococcaceae	0.00481403	0.000398614
Family_III	0	0.0021839	1.07581e-05	7.53069e-05	0	0.000139856	0.000817618	0.00770282	0.00107581	0.000753069	0.00107581	0.0140178	0.00219466	0.00461524	0.000161372	0.000225921	4.30325e-05	6.45488e-05	0.000591697	1.07581e-05	0	0.00017213	0.000667004	0.000129098	0.000301228	0.000763827	4.30325e-05	8.6065e-05	0.000311986	2.15163e-05	0	1.07581e-05	0.000161372	2.15163e-05	0.00157069	0.00640108	0.00128948	k__Bacteria;p__Firmicutes;c__Clostridia;o__Thermoanaerobacterales;f__Family_III;									Clostridiaceae_1	0.000329623	0.0047757
Family_XIII	0	0.000290469	0.000935957	3.22744e-05	7.53069e-05	1.07581e-05	0.000150614	3.22744e-05	2.15163e-05	8.6065e-05	0.000946715	0.000419567	9.68231e-05	0.000193646	0.000161372	4.30325e-05	6.45488e-05	0	8.6065e-05	0	0	0.00034426	0.00956397	0.0220326	0	6.45488e-05	1.07581e-05	0.000161372	4.30325e-05	5.37906e-05	0.00713264	0.000129098	6.45488e-05	3.22744e-05	0.000150614	7.53069e-05	0.0012085	k__Bacteria;p__Firmicutes;c__Clostridia;o__Clostridiales;f__Family_XIII;									Acetobacteraceae	0	0.000168644
Dermabacteraceae	0	6.45488e-05	0.00104354	0.0104784	0.000150614	0.000247437	8.6065e-05	0	0.000150614	9.68231e-05	1.07581e-05	0.000150614	0	8.6065e-05	3.22744e-05	0.000903683	6.45488e-05	1.07581e-05	0.00260347	0	0	9.68231e-05	0.00899379	0.000182888	0.000129098	0.000505632	0.000204404	0.0130496	0	0	8.6065e-05	0	0	0	8.6065e-05	1.07581e-05	0.00109793	k__Bacteria;p__Actinobacteria;c__unidentified_Actinobacteria;o__Micrococcales;f__Dermabacteraceae;									Burkholderiaceae	5.36596e-05	0.000214638
Intrasporangiaceae	0	0	3.22744e-05	0.000225921	1.07581e-05	0.000699278	4.30325e-05	0.000236679	0.000527148	0.00502404	0.000161372	0.000322744	0.000182888	0.000161372	0.0242811	0.000871408	0.000279711	0.000301228	0	0	1.07581e-05	0.000441083	0	0	0	1.07581e-05	0	2.15163e-05	0	4.30325e-05	0.000204404	0	0.000634729	0	0	0.00110809	0.000995425	k__Bacteria;p__Actinobacteria;c__unidentified_Actinobacteria;o__Micrococcales;f__Intrasporangiaceae;									Intrasporangiaceae	0.00449207	0.000283629
Hydrogenophilaceae	7.53069e-05	0.000107581	5.37906e-05	0.00149538	8.6065e-05	0.00017213	0.00147386	8.6065e-05	0.000129098	0.000204404	0.000161372	0.000430325	0.00507784	0.000150614	0.000139856	0.00146311	2.15163e-05	9.68231e-05	1.07581e-05	7.53069e-05	0.0056265	4.30325e-05	3.22744e-05	5.37906e-05	4.30325e-05	0.000182888	0.000462599	0.00407733	0.00017213	0.000742311	0.000182888	8.6065e-05	0.0114789	0.000387293	0.000150614	0.00034426	0.000988253	k__Bacteria;p__Proteobacteria;c__Betaproteobacteria;o__Hydrogenophilales;f__Hydrogenophilaceae;									Nocardiaceae	0.00321958	0.00242235
Bogoriellaceae	0	0	0	3.22744e-05	0	0.00034426	0	1.07581e-05	3.22744e-05	0.00225921	7.53069e-05	9.68231e-05	5.37906e-05	6.45488e-05	0.0282724	0.000451841	0.000236679	0.000161372	0	0	0	0.0011296	1.07581e-05	1.07581e-05	0	0	0	0	0	0	2.15163e-05	0	0.000322744	0	0	0.000613213	0.000950002	k__Bacteria;p__Actinobacteria;c__unidentified_Actinobacteria;o__Micrococcales;f__Bogoriellaceae;									Geodermatophilaceae	0.0060252	0.000689909
Rhodocyclaceae	0	5.37906e-05	0.000118339	0.00017213	0.000129098	0.000225921	0.000107581	0.00266802	0.000150614	0.000215163	0.000150614	0.000236679	0.000419567	0.000204404	1.07581e-05	0	6.45488e-05	0.000161372	0.000225921	0.00491646	1.07581e-05	1.07581e-05	0	2.15163e-05	0.000376534	0.000268953	0.0094026	0.00533603	0.000247437	7.53069e-05	0.00559423	7.53069e-05	9.68231e-05	0.000161372	0.000107581	0.000204404	0.000895016	k__Bacteria;p__Proteobacteria;c__Betaproteobacteria;o__Rhodocyclales;f__Rhodocyclaceae;									Xanthomonadaceae	0.00554227	0.000613252
Alicyclobacillaceae	6.45488e-05	0.000139856	9.68231e-05	5.37906e-05	0.000118339	0.00163524	0.000290469	0.000494874	0.00034426	0.000279711	0.000333502	0.00443235	0.00402354	0.00300152	5.37906e-05	5.37906e-05	0.000215163	0.000419567	0.000118339	4.30325e-05	0.00587394	2.15163e-05	0.000193646	0.000107581	0.00417415	0.000333502	0.000408809	0.000204404	9.68231e-05	0.00258195	1.07581e-05	2.15163e-05	6.45488e-05	0.000279711	0.000182888	0.000591697	0.000871109	k__Bacteria;p__Firmicutes;c__Bacilli;o__Bacillales;f__Alicyclobacillaceae;									Caulobacteraceae	0.0058259	0.000283629
Cytophagaceae	0	0.0067561	1.07581e-05	1.07581e-05	0	6.45488e-05	0.000129098	0	0	0	0	3.22744e-05	3.22744e-05	0	7.53069e-05	0.00189343	3.22744e-05	3.22744e-05	0	0	0	0.000107581	7.53069e-05	6.45488e-05	0	3.22744e-05	5.37906e-05	0.00202253	5.37906e-05	3.22744e-05	4.30325e-05	5.37906e-05	0.0173313	0.000129098	5.37906e-05	5.37906e-05	0.000810445	k__Bacteria;p__Bacteroidetes;c__Cytophagia;o__Cytophagales;f__Cytophagaceae;									Chromatiaceae	0	0
Aerococcaceae	0.000268953	0.000225921	0	0	0.000150614	0	0.000225921	0	0	0	0.000215163	0.000139856	0	0.00034426	0	5.37906e-05	0.000204404	7.53069e-05	0.00356094	3.22744e-05	1.07581e-05	0.000193646	0.000333502	0.011608	0	7.53069e-05	0	0.000204404	0.000129098	0.000118339	0.000129098	0.00980065	0.000161372	0.000182888	0.000301228	0	0.000798492	k__Bacteria;p__Firmicutes;c__Bacilli;o__Lactobacillales;f__Aerococcaceae;									Haliangiaceae	7.66565e-05	0.00535063
Caulobacteraceae	0.0143621	0	0.000139856	0.000139856	2.15163e-05	0	6.45488e-05	3.22744e-05	0.000139856	0.00504556	6.45488e-05	0.000150614	9.68231e-05	0.000107581	0	0	2.15163e-05	0	0	0	0.000107581	1.07581e-05	0	0	0	2.15163e-05	3.22744e-05	0.00222693	2.15163e-05	0.00467978	0.000225921	2.15163e-05	3.22744e-05	5.37906e-05	5.37906e-05	0.000107581	0.000777275	k__Bacteria;p__Proteobacteria;c__Alphaproteobacteria;o__Caulobacterales;f__Caulobacteraceae;									DA111	9.19879e-05	0.00496734
Family_XVI	0	0.000118339	9.68231e-05	4.30325e-05	0.0054221	0.000268953	0.000139856	0.00017213	0.000107581	0.000129098	0.000279711	0.000355018	0.00178585	0.000161372	0.000161372	0	0	7.53069e-05	0	5.37906e-05	0	0.000193646	1.07581e-05	0	7.53069e-05	0.000118339	0.000398051	7.53069e-05	0.000118339	6.45488e-05	4.30325e-05	0.000129098	0.000290469	0.00803632	0.000139856	0.00797177	0.000750977	k__Bacteria;p__Firmicutes;c__Clostridia;o__Clostridiales;f__Family_XVI;									Carnobacteriaceae	5.36596e-05	0.00144881
Rhizobiaceae	0	9.68231e-05	0.000150614	0.000161372	0.000129098	0.000355018	0.000161372	0	0	0	0	0.00034426	0	0	7.53069e-05	0.000139856	0	2.15163e-05	0.000236679	0	2.15163e-05	0.00849892	0.000301228	0.000118339	9.68231e-05	0.0151582	0.000236679	0.000193646	0	0	0	0	8.6065e-05	0	0	0.000161372	0.000742908	k__Bacteria;p__Proteobacteria;c__Alphaproteobacteria;o__Rhizobiales;f__Rhizobiaceae;									Coriobacteriaceae	0.000597921	0.00370251
Enterococcaceae	0.000118339	0.000161372	2.15163e-05	3.22744e-05	0	2.15163e-05	0.000107581	2.15163e-05	0.000150614	0.00117264	1.07581e-05	0.000107581	4.30325e-05	8.6065e-05	2.15163e-05	4.30325e-05	9.68231e-05	3.22744e-05	2.15163e-05	0	0.0110701	0.00194722	0.00311986	0.00559423	0	4.30325e-05	0	4.30325e-05	1.07581e-05	0.00164599	6.45488e-05	3.22744e-05	4.30325e-05	3.22744e-05	7.53069e-05	7.53069e-05	0.000724082	k__Bacteria;p__Firmicutes;c__Bacilli;o__Lactobacillales;f__Enterococcaceae;									Nakamurellaceae	0	5.36596e-05
Campylobacteraceae	0	0	2.15163e-05	3.22744e-05	0.012856	2.15163e-05	5.37906e-05	0	0	0	8.6065e-05	0	0	0	3.22744e-05	0	0.000419567	0	0	0	0	0	0	1.07581e-05	4.30325e-05	8.6065e-05	3.22744e-05	6.45488e-05	2.15163e-05	1.07581e-05	3.22744e-05	0.0120599	2.15163e-05	4.30325e-05	9.68231e-05	0	0.000723484	k__Bacteria;p__Proteobacteria;c__Epsilonproteobacteria;o__Campylobacterales;f__Campylobacteraceae;									unidentified_Xanthomonadales	0.0038175	0.000191641
Cardiobacteriaceae	0.0155778	0	0	0	0	1.07581e-05	0	0.0070896	0.000193646	0.00017213	0.000182888	0.000484116	0.000301228	0.00017213	0	0	0	0	2.15163e-05	0	0.000161372	0	0	0	0.000311986	0	0	0	0.000301228	0	0	0	0	0	0	0.000333502	0.000703163	k__Bacteria;p__Proteobacteria;c__Gammaproteobacteria;o__Cardiobacteriales;f__Cardiobacteriaceae;									Dietziaceae	0.00365652	0.000206973
Aeromonadaceae	0	0.00939184	0	0	7.53069e-05	0	0.000204404	0	0	0	0.000161372	0	0.000118339	0	0	0	0	0	0	3.22744e-05	0	0.000129098	0.000150614	0.000139856	0	0	0.000107581	0	0.000118339	0.000129098	8.6065e-05	0.0123073	0.000161372	0.000247437	8.6065e-05	0	0.000656843	k__Bacteria;p__Proteobacteria;c__Gammaproteobacteria;o__Aeromonadales;f__Aeromonadaceae;									mle1-27	0	3.06626e-05
Mycobacteriaceae	0	0.000139856	1.07581e-05	1.07581e-05	0	0.000150614	1.07581e-05	0	0	0	0	3.22744e-05	0	2.15163e-05	0.000150614	0.00110809	1.07581e-05	8.6065e-05	2.15163e-05	0	2.15163e-05	0.0187729	0.000236679	0.000225921	0	4.30325e-05	1.07581e-05	0.00178585	0	0	0	0	7.53069e-05	0	0	0.000225921	0.000643097	k__Bacteria;p__Actinobacteria;c__unidentified_Actinobacteria;o__Corynebacteriales;f__Mycobacteriaceae;									Elev-16S-1332	4.59939e-05	0.00364885
Dermacoccaceae	0	0	8.6065e-05	3.22744e-05	5.37906e-05	0.000118339	0.00519617	0	0	0	0	8.6065e-05	0	0.000139856	0	4.30325e-05	3.22744e-05	0	1.07581e-05	0	0	0	4.30325e-05	6.45488e-05	5.37906e-05	0.000225921	0.000129098	0.0119415	3.22744e-05	7.53069e-05	2.15163e-05	3.22744e-05	7.53069e-05	3.22744e-05	8.6065e-05	0	0.000516988	k__Bacteria;p__Actinobacteria;c__unidentified_Actinobacteria;o__Micrococcales;f__Dermacoccaceae;									Bacteroidaceae	0.000268298	0.00332689
Thermoanaerobacteraceae	0	0.000376534	0	5.37906e-05	0	0	0.000129098	0.00051639	0.000247437	0.000430325	0.000451841	0.00107581	0.00923047	0.000559423	0	0	0	0	0	0.00017213	0	0	0	0	0	0	0.000613213	0	4.30325e-05	7.53069e-05	0.00308758	6.45488e-05	9.68231e-05	0.000548664	7.53069e-05	0.000699278	0.000515195	k__Bacteria;p__Firmicutes;c__Clostridia;o__Thermoanaerobacterales;f__Thermoanaerobacteraceae;									Bogoriellaceae	9.96535e-05	0.00305093
Aurantimonadaceae	0	0.000462599	1.07581e-05	0	0	0	1.07581e-05	0.000268953	0.000376534	0.000613213	0.000355018	0.000903683	0.0114466	0.000376534	0	0	0	0	0	0.000225921	0	0	0	0	0	0	0.00121567	0	0	0	0	0	0	0.000785343	0	0.00068852	0.000492782	k__Bacteria;p__Proteobacteria;c__Alphaproteobacteria;o__Rhizobiales;f__Aurantimonadaceae;									Aurantimonadaceae	0	8.43222e-05
Veillonellaceae	2.15163e-05	4.30325e-05	0.000731553	4.30325e-05	0.00311986	0.000129098	5.37906e-05	0.000129098	0.000150614	3.22744e-05	0.00194722	0.000204404	0.00034426	4.30325e-05	3.22744e-05	0	0	0	0	8.6065e-05	0	2.15163e-05	0	0	9.68231e-05	0.000247437	0.00630426	0.000107581	0.00276484	4.30325e-05	2.15163e-05	0.000623971	4.30325e-05	9.68231e-05	3.22744e-05	0.000107581	0.000489495	k__Bacteria;p__Firmicutes;c__Negativicutes;o__Selenomonadales;f__Veillonellaceae;									AKYG937	0.000107319	0.00304326
Acetobacteraceae	0	0	7.53069e-05	0.000150614	0.00602455	0.000139856	0.00488419	1.07581e-05	4.30325e-05	0.00110809	0.000193646	0.000247437	4.30325e-05	2.15163e-05	0	7.53069e-05	0	0	0.000129098	0	0	0	0.000150614	0	8.6065e-05	0.00320592	0.000161372	0.000161372	5.37906e-05	6.45488e-05	0.000107581	0.000150614	6.45488e-05	8.6065e-05	4.30325e-05	1.07581e-05	0.000485909	k__Bacteria;p__Proteobacteria;c__Alphaproteobacteria;o__Rhodospirillales;f__Acetobacteraceae;									Aeromonadaceae	0	7.66565e-05
Nocardioidaceae	0	0	0.000150614	7.53069e-05	7.53069e-05	0.000118339	7.53069e-05	0	0.000107581	0	0	1.07581e-05	0	0.000182888	0	0	0.000129098	0	0	0	0	0	0	0.000139856	8.6065e-05	0.000182888	8.6065e-05	0.00926275	6.45488e-05	0.0039052	3.22744e-05	5.37906e-05	7.53069e-05	4.30325e-05	0.000161372	0	0.000417176	k__Bacteria;p__Actinobacteria;c__unidentified_Actinobacteria;o__Propionibacteriales;f__Nocardioidaceae;									Cellulomonadaceae	0	3.83283e-05
Carnobacteriaceae	0	0.000182888	0	4.30325e-05	0	0.000129098	0	6.45488e-05	2.15163e-05	0.00144159	8.6065e-05	0.000129098	5.37906e-05	4.30325e-05	6.45488e-05	0	0	4.30325e-05	0	0	2.15163e-05	0.01121	0.000247437	0.000182888	0	0	0	0	0	0	8.6065e-05	0	0.000118339	0	0	0.000301228	0.000401936	k__Bacteria;p__Firmicutes;c__Bacilli;o__Lactobacillales;f__Carnobacteriaceae;									Chitinophagaceae	0	1.53313e-05
Burkholderiaceae	0	5.37906e-05	5.37906e-05	0	0	3.22744e-05	0.00190419	0	3.22744e-05	0	0	0.00017213	0	0	0.00135552	9.68231e-05	2.15163e-05	2.15163e-05	0.000118339	0	0	0.000150614	0.00600303	6.45488e-05	0	9.68231e-05	0	0	3.22744e-05	0.00366852	5.37906e-05	4.30325e-05	0.000129098	5.37906e-05	6.45488e-05	6.45488e-05	0.000396855	k__Bacteria;p__Proteobacteria;c__Betaproteobacteria;o__Burkholderiales;f__Burkholderiaceae;									Clostridiales_vadinBB60_group	0	0
Geodermatophilaceae	0	0	5.37906e-05	6.45488e-05	0.00854195	0.000161372	0.000118339	0.000107581	6.45488e-05	4.30325e-05	0.000204404	0.00216238	0.00017213	9.68231e-05	0	4.30325e-05	0	0	0.000129098	0	0	0	9.68231e-05	0	0.000118339	0.000387293	0.000139856	9.68231e-05	0	0	0	4.30325e-05	0	0	0	0.000118339	0.000360098	k__Bacteria;p__Actinobacteria;c__unidentified_Actinobacteria;o__Frankiales;f__Geodermatophilaceae;									Family_III	7.66565e-06	0.000337289
unidentified_SR1_(Absconditabacteria)	0	0	0	0	0	0	4.30325e-05	0	0	0	0	0	0	5.37906e-05	0	0	1.07581e-05	0	0	0	0	0	0	1.07581e-05	0	0	0	3.22744e-05	3.22744e-05	1.07581e-05	0	1.07581e-05	4.30325e-05	3.22744e-05	0.0118877	0	0.000337984	k__Bacteria;p__SR1_(Absconditabacteria);c__unidentified_SR1_(Absconditabacteria);o__unidentified_SR1_(Absconditabacteria);f__unidentified_SR1_(Absconditabacteria);									Veillonellaceae	8.43222e-05	0.00216938
Geobacteraceae	2.15163e-05	0.000118339	0	0.000839134	3.22744e-05	2.15163e-05	5.37906e-05	0	0	4.30325e-05	0	0.000161372	0	0	0	4.30325e-05	0	0	9.68231e-05	0	0.00363625	0.000161372	0.00552968	0.000129098	1.07581e-05	0.000129098	2.15163e-05	5.37906e-05	0	0	2.15163e-05	0	0	0	0	0	0.000308997	k__Bacteria;p__Proteobacteria;c__Deltaproteobacteria;o__Desulfuromonadales;f__Geobacteraceae;									Halomonadaceae	0	6.89909e-05
Peptostreptococcaceae	0	3.22744e-05	0.00153841	0	4.30325e-05	9.68231e-05	4.30325e-05	0	2.15163e-05	0	0	0	7.53069e-05	0	7.53069e-05	0	0	0.00378686	9.68231e-05	0.000129098	1.07581e-05	0.000107581	0	0	2.15163e-05	5.37906e-05	8.6065e-05	3.22744e-05	2.15163e-05	7.53069e-05	6.45488e-05	3.22744e-05	0.00017213	0.00418491	6.45488e-05	0.000139856	0.00030571	k__Bacteria;p__Firmicutes;c__Clostridia;o__Clostridiales;f__Peptostreptococcaceae;									Sandaracinaceae	0	5.36596e-05
Bifidobacteriaceae	0	0	1.07581e-05	2.15163e-05	4.30325e-05	0.00174282	0.000118339	0	0	0	8.6065e-05	0	0	0	1.07581e-05	0	0	0	0	0	0	3.22744e-05	0	0	0	1.07581e-05	1.07581e-05	1.07581e-05	5.37906e-05	4.30325e-05	2.15163e-05	0.00800405	8.6065e-05	3.22744e-05	6.45488e-05	4.30325e-05	0.000290171	k__Bacteria;p__Actinobacteria;c__unidentified_Actinobacteria;o__Bifidobacteriales;f__Bifidobacteriaceae;									Family_XIII	0.000130316	8.43222e-05
Erythrobacteraceae	0	0	9.68231e-05	6.45488e-05	0.00845589	9.68231e-05	0	0	0	0	0.000150614	0	0	0	0	0	0	0	0	0	0	0	0	0	7.53069e-05	0.000139856	0.000129098	9.68231e-05	0	0	0	0.000139856	0	0	0	0	0.000262379	k__Bacteria;p__Proteobacteria;c__Alphaproteobacteria;o__Sphingomonadales;f__Erythrobacteraceae;									Listeriaceae	6.13252e-05	0.00170178
Methylococcaceae	0	0	0	7.53069e-05	0	0	0.000118339	0	0	7.53069e-05	0	0	0	0	0	0	0	0	0	0	0	0	0	0	0	0	0	0	7.53069e-05	8.6065e-05	0.00775661	7.53069e-05	9.68231e-05	7.53069e-05	6.45488e-05	0	0.000236081	k__Bacteria;p__Proteobacteria;c__Gammaproteobacteria;o__Methylococcales;f__Methylococcaceae;									Lentimicrobiaceae	2.2997e-05	0.00157912
Hyphomicrobiaceae	0	0	7.53069e-05	6.45488e-05	0.00694975	6.45488e-05	0	0	0	0	0.000118339	0	0	0	0	0	0	0	0	0	0	0	0	0	6.45488e-05	0.000139856	0.000129098	0.000139856	0	0	0	0.000107581	0	0	0	0	0.000218151	k__Bacteria;p__Proteobacteria;c__Alphaproteobacteria;o__Rhizobiales;f__Hyphomicrobiaceae;									Pseudonocardiaceae	0	0
Bdellovibrionaceae	0	2.15163e-05	0	4.30325e-05	2.15163e-05	2.15163e-05	0	0	0	0	0	0	3.22744e-05	0	0	0	0	0	0	1.07581e-05	0	0	0	0	2.15163e-05	3.22744e-05	0.00705733	5.37906e-05	0	0	0	0	0	1.07581e-05	0	0	0.000203508	k__Bacteria;p__Proteobacteria;c__Deltaproteobacteria;o__Bdellovibrionales;f__Bdellovibrionaceae;									Eubacteriaceae	0	0
unidentified_Rhodospirillales	0	0	0	0	0	0	7.53069e-05	0	0	0	0	0.000129098	0	0	0	3.22744e-05	0	0.000118339	0.00663776	4.30325e-05	0	0	3.22744e-05	0	0	9.68231e-05	0	0	0	0	0	0	0	0	0	0	0.000199025	k__Bacteria;p__Proteobacteria;c__Alphaproteobacteria;o__Rhodospirillales;f__unidentified_Rhodospirillales;									Aerococcaceae	0.000697575	7.66565e-05
Bartonellaceae	0	0	0	0	0	3.22744e-05	9.68231e-05	0	0	0	0	0	2.15163e-05	0	2.15163e-05	0	0	1.07581e-05	0	0	0	3.22744e-05	0	0	0	0	0	0	5.37906e-05	6.45488e-05	6.45488e-05	3.22744e-05	0.00626123	4.30325e-05	4.30325e-05	9.68231e-05	0.000190957	k__Bacteria;p__Proteobacteria;c__Alphaproteobacteria;o__Rhizobiales;f__Bartonellaceae;									Peptostreptococcaceae	8.43222e-05	0
Shewanellaceae	0	0	5.37906e-05	5.37906e-05	0.00591697	9.68231e-05	0	0	0	0	6.45488e-05	0	0	0	0	0	0	0	0	0	0	0	0	0	6.45488e-05	0.000129098	0.000129098	0.000107581	0	0	0	2.15163e-05	0	0	0	0	0.000184382	k__Bacteria;p__Proteobacteria;c__Gammaproteobacteria;o__Alteromonadales;f__Shewanellaceae;									Peptococcaceae	0.000160979	2.2997e-05
Chromatiaceae	0	0	0	0	0	0.000182888	0	0.000129098	5.37906e-05	6.45488e-05	6.45488e-05	0.00017213	9.68231e-05	0.000129098	8.6065e-05	0	0	7.53069e-05	0	0	0	0.000118339	0	0	0	0	0	0	0	0	0	0	0.000118339	0	0	0.00532527	0.000183785	k__Bacteria;p__Proteobacteria;c__Gammaproteobacteria;o__Chromatiales;f__Chromatiaceae;									Hydrogenophilaceae	0	0
Blastocatellaceae_(Subgroup_4)	0	5.37906e-05	0	0	0	0	3.22744e-05	0	0	0	0	8.6065e-05	0	0	0	4.30325e-05	0	0	9.68231e-05	0	0	4.30325e-05	0.00599228	5.37906e-05	0	5.37906e-05	0	0	0	0	0	0	0	0	0	0	0.000179302	k__Bacteria;p__Acidobacteria;c__Blastocatellia;o__unidentified_Blastocatellia;f__Blastocatellaceae_(Subgroup_4);									Xanthobacteraceae	0	0
Bacteroidaceae	0	0	0	0	0	0	2.15163e-05	0	0	0	0	0	0	0	0	0	2.15163e-05	0	0	0	0	0	0	0	0	0	0	3.22744e-05	2.15163e-05	4.30325e-05	0	2.15163e-05	2.15163e-05	1.07581e-05	0.00603531	0	0.000173027	k__Bacteria;p__Bacteroidetes;c__Bacteroidia;o__Bacteroidales;f__Bacteroidaceae;									Rikenellaceae	0	2.2997e-05
Ruminococcaceae	0	0	0	0	0	0.000161372	0	0	0	0	0	0	0	0	0.00441083	0.000258195	0.000268953	9.68231e-05	0	0	0	8.6065e-05	0	0	0	0	0	0	0	0	0	0	0.000161372	0	0	0.000258195	0.000158384	k__Bacteria;p__Firmicutes;c__Clostridia;o__Clostridiales;f__Ruminococcaceae;									Defluviitaleaceae	1.53313e-05	0
Solimonadaceae	0	0	1.07581e-05	4.30325e-05	0.00458296	7.53069e-05	0	0	0	0	6.45488e-05	0	0	0	0	0	0	0	0	0	0	0	0	0	4.30325e-05	5.37906e-05	8.6065e-05	3.22744e-05	0	0	0	4.30325e-05	0	0	0	0	0.000139856	k__Bacteria;p__Proteobacteria;c__Gammaproteobacteria;o__Xanthomonadales;f__Solimonadaceae;									unidentified_Bacteroidales	7.66565e-06	0
Rhodospirillaceae	0	0	2.15163e-05	3.22744e-05	3.22744e-05	0.00306607	4.30325e-05	0	0	0	0	4.30325e-05	0	0	3.22744e-05	1.07581e-05	0	3.22744e-05	2.15163e-05	0	0	1.07581e-05	2.15163e-05	0	3.22744e-05	0.00114036	5.37906e-05	7.53069e-05	0	0	0	0	5.37906e-05	0	0	7.53069e-05	0.000133281	k__Bacteria;p__Proteobacteria;c__Alphaproteobacteria;o__Rhodospirillales;f__Rhodospirillaceae;
Listeriaceae	0	0	0	0	0	6.45488e-05	0	0	0	0	0	0	0	0	3.22744e-05	0	0	0.00363625	8.6065e-05	6.45488e-05	0	4.30325e-05	0	0	0	0	0	0	0	0	0	0	4.30325e-05	0	0	0.000118339	0.000113558	k__Bacteria;p__Firmicutes;c__Bacilli;o__Bacillales;f__Listeriaceae;
Leptospiraceae	0	0	1.07581e-05	0.00334578	0	1.07581e-05	0	0	0	2.15163e-05	0	0	0	0	0	0	0	0	0	0	0	0	0	0	0	4.30325e-05	3.22744e-05	4.30325e-05	0	0	4.30325e-05	0	0	0	0	0	9.86161e-05	k__Bacteria;p__Spirochaetes;c__unidentified_Spirochaetes;o__Spirochaetales;f__Leptospiraceae;
Peptococcaceae	0	1.07581e-05	1.07581e-05	3.22744e-05	1.07581e-05	0.00215163	0	1.07581e-05	0	0	0	2.15163e-05	0.000161372	2.15163e-05	3.22744e-05	0	0	2.15163e-05	0	0	0	3.22744e-05	0	0	0	3.22744e-05	7.53069e-05	3.22744e-05	0	0	0	0	3.22744e-05	2.15163e-05	0	7.53069e-05	7.73987e-05	k__Bacteria;p__Firmicutes;c__Clostridia;o__Clostridiales;f__Peptococcaceae;
Phyllobacteriaceae	0	0	0	0	0	4.30325e-05	3.22744e-05	0	0	0	0	0	0	0	3.22744e-05	0	0	3.22744e-05	0	0	0	1.07581e-05	0	0	0	0	0	0	2.15163e-05	1.07581e-05	2.15163e-05	3.22744e-05	0.00228072	1.07581e-05	2.15163e-05	4.30325e-05	7.20197e-05	k__Bacteria;p__Proteobacteria;c__Alphaproteobacteria;o__Rhizobiales;f__Phyllobacteriaceae;
Bradyrhizobiaceae	0	0	4.30325e-05	0	0	0	2.15163e-05	0	6.45488e-05	0	0	0	0	0	0	0	0	0	0	0	0	0	0	0	0	0	0	0	2.15163e-05	0.00200101	1.07581e-05	3.22744e-05	2.15163e-05	3.22744e-05	2.15163e-05	0	6.30546e-05	k__Bacteria;p__Proteobacteria;c__Alphaproteobacteria;o__Rhizobiales;f__Bradyrhizobiaceae;
0319-6G20	0	0	0	0	0	3.22744e-05	0	0	0	0	0	0	0	0	0.0013878	5.37906e-05	1.07581e-05	0	0	0	0	1.07581e-05	0	0	0	0	0	0	0	0	0	0	4.30325e-05	0	0	4.30325e-05	4.3929e-05	k__Bacteria;p__Proteobacteria;c__Deltaproteobacteria;o__Oligoflexales;f__0319-6G20;
Demequinaceae	0	0	0	0	0	0	4.30325e-05	0	0	0	0	2.15163e-05	0	0	6.45488e-05	0.000968231	1.07581e-05	0	3.22744e-05	0	0	0	1.07581e-05	0	0	3.22744e-05	0	0	0	0	0	0	0	0	1.07581e-05	0	3.31709e-05	k__Bacteria;p__Actinobacteria;c__unidentified_Actinobacteria;o__Micrococcales;f__Demequinaceae;
Alcaligenaceae	0	0	0	0	0	0	0	0	0	0	0	2.15163e-05	0	0	1.07581e-05	0.00107581	0	0	0	0	0	0	2.15163e-05	0	0	0	0	0	0	0	0	0	0	0	0	0	3.13779e-05	k__Bacteria;p__Proteobacteria;c__Betaproteobacteria;o__Burkholderiales;f__Alcaligenaceae;
Gemmatimonadaceae	0	0	0	2.15163e-05	0.000462599	0	0	0	0	0	1.07581e-05	0	0	0	0	0	0	0	0	0	0	0	0	0	0	0	0	1.07581e-05	0	0	0	3.22744e-05	0	0	0	0	1.49418e-05	k__Bacteria;p__Gemmatimonadetes;c__unidentified_Gemmatimonadetes;o__Gemmatimonadales;f__Gemmatimonadaceae;
Promicromonosporaceae	0.000118339	0	0	0	0	2.15163e-05	0	0	0	5.37906e-05	0	0	0	0	0.000247437	0	0	0	0	0	0	2.15163e-05	0	0	0	0	0	0	0	0	0	0	0	0	0	5.37906e-05	1.43442e-05	k__Bacteria;p__Actinobacteria;c__unidentified_Actinobacteria;o__Micrococcales;f__Promicromonosporaceae;
IheB3-7	0	0	0.000451841	0	0	1.07581e-05	0	0	0	0	0	0	0	0	0	0	0	0	0	0	0	0	0	0	0	0	1.07581e-05	0	0	1.07581e-05	0	0	0	0	0	0	1.34477e-05	k__Bacteria;p__Ignavibacteriae;c__Ignavibacteria;o__Ignavibacteriales;f__IheB3-7;
Oligoflexaceae	0	0	0	0	0	0	0	0.000333502	0	0	1.07581e-05	2.15163e-05	0	2.15163e-05	0	0	0	0	0	0	0	0	0	0	1.07581e-05	0	0	0	1.07581e-05	0	0	0	0	0	0	1.07581e-05	1.16546e-05	k__Bacteria;p__Proteobacteria;c__Deltaproteobacteria;o__Oligoflexales;f__Oligoflexaceae;
Mitochondria	0	0	0	3.22744e-05	1.07581e-05	0	0	7.53069e-05	0	0	0	2.15163e-05	0	0	0	0	0	0	0	0	0	0	0	0	0.000225921	0	0	0	0	0	0	0	0	0	0	0	1.01605e-05	k__Bacteria;p__Proteobacteria;c__Alphaproteobacteria;o__Rickettsiales;f__Mitochondria;
Sporolactobacillaceae	0	0	0	0	0	0	0	0	0	0	0	0	0	1.07581e-05	0	0	0	0	0	0	0	1.07581e-05	1.07581e-05	0.000301228	0	0	0	0	0	0	0	0	0	0	0	0	9.26394e-06	k__Bacteria;p__Firmicutes;c__Bacilli;o__Bacillales;f__Sporolactobacillaceae;
Myxococcaceae	0	0	0	0	0	0	0	0	0	0	0	0	0	2.15163e-05	0	0	0.000118339	0	0	0	0	0	0	0	0	0	0	0	0	0	0	0	0	0	0	0	3.88488e-06	k__Bacteria;p__Proteobacteria;c__Deltaproteobacteria;o__Myxococcales;f__Myxococcaceae;
Saprospiraceae	0	0	0	0	0	0	0	0	0.000118339	0	0	0	0	0	0	0	0	0	0	0	0	0	0	0	0	0	0	0	0	1.07581e-05	0	0	0	0	0	1.07581e-05	3.88488e-06	k__Bacteria;p__Bacteroidetes;c__Sphingobacteriia;o__Sphingobacteriales;f__Saprospiraceae;
Dietziaceae	0	0	0	0	0	0	0	0	0	0	0	0	0	1.07581e-05	0	0	0.000107581	0	0	0	0	0	0	0	0	0	0	0	0	0	0	0	0	0	0	0	3.2872e-06	k__Bacteria;p__Actinobacteria;c__unidentified_Actinobacteria;o__Corynebacteriales;f__Dietziaceae;
Idiomarinaceae	1.07581e-05	0	0	0	0	0	0	0	0	0	0	0	0	0	0	0	0	0	0	0	4.30325e-05	0	0	0	0	0	0	0	0	0	0	0	0	0	0	0	1.49418e-06	k__Bacteria;p__Proteobacteria;c__Gammaproteobacteria;o__Alteromonadales;f__Idiomarinaceae;
Alcanivoracaceae	1.07581e-05	0	0	0	0	0	0	0	0	0	0	0	0	0	0	0	0	0	0	0	4.30325e-05	0	0	0	0	0	0	0	0	0	0	0	0	0	0	0	1.49418e-06	k__Bacteria;p__Proteobacteria;c__Gammaproteobacteria;o__Oceanospirillales;f__Alcanivoracaceae;
Methylophilaceae	0	0	0	0	0	0	0	0	0	0	0	0	0	0	0	0	0	0	0	0	3.22744e-05	0	0	0	0	0	0	0	0	0	0	0	0	0	0	0	8.9651e-07	k__Bacteria;p__Proteobacteria;c__Betaproteobacteria;o__Methylophilales;f__Methylophilaceae;
Vibrionaceae	2.15163e-05	0	0	0	0	0	0	0	0	0	0	0	0	0	0	0	0	0	0	0	0	0	0	0	0	0	0	0	0	0	0	0	0	0	0	0	5.97674e-07	k__Bacteria;p__Proteobacteria;c__Gammaproteobacteria;o__Vibrionales;f__Vibrionaceae;
Acholeplasmataceae	0	0	0	0	0	0	0	0	0	0	0	0	0	0	0	0	1.07581e-05	0	0	0	0	0	0	0	0	0	0	0	0	0	0	0	0	0	0	0	2.98837e-07	k__Bacteria;p__Tenericutes;c__Mollicutes;o__Acholeplasmatales;f__Acholeplasmataceae;
Clostridiaceae_4	1.07581e-05	0	0	0	0	0	0	0	0	0	0	0	0	0	0	0	0	0	0	0	0	0	0	0	0	0	0	0	0	0	0	0	0	0	0	0	2.98837e-07	k__Bacteria;p__Firmicutes;c__Clostridia;o__Clostridiales;f__Clostridiaceae_4;
Solirubrobacteraceae	0	0	0	0	0	0	0	0	0	0	0	0	0	0	0	0	0	0	0	0	1.07581e-05	0	0	0	0	0	0	0	0	0	0	0	0	0	0	0	2.98837e-07	k__Bacteria;p__Actinobacteria;c__Thermoleophilia;o__Solirubrobacterales;f__Solirubrobacteraceae;
Thermaceae	0	0	0	0	0	0	0	0	0	0	0	1.07581e-05	0	0	0	0	0	0	0	0	0	0	0	0	0	0	0	0	0	0	0	0	0	0	0	0	2.98837e-07	k__Bacteria;p__Deinococcus-Thermus;c__Deinococci;o__Thermales;f__Thermaceae;
unidentified_Bacteroidales	0	0	0	0	0	0	0	0	0	0	0	0	0	0	0	0	0	0	0	0	0	0	0	0	0	0	0	0	0	0	0	0	0	0	0	0	0	k__Bacteria;p__Bacteroidetes;c__Bacteroidia;o__Bacteroidales;f__unidentified_Bacteroidales;
Mycoplasmataceae	0	0	0	0	0	0	0	0	0	0	0	0	0	0	0	0	0	0	0	0	0	0	0	0	0	0	0	0	0	0	0	0	0	0	0	0	0	k__Bacteria;p__Tenericutes;c__Mollicutes;o__Mycoplasmatales;f__Mycoplasmataceae;
Rikenellaceae	0	0	0	0	0	0	0	0	0	0	0	0	0	0	0	0	0	0	0	0	0	0	0	0	0	0	0	0	0	0	0	0	0	0	0	0	0	k__Bacteria;p__Bacteroidetes;c__Bacteroidia;o__Bacteroidales;f__Rikenellaceae;
Clostridiales_vadinBB60_group	0	0	0	0	0	0	0	0	0	0	0	0	0	0	0	0	0	0	0	0	0	0	0	0	0	0	0	0	0	0	0	0	0	0	0	0	0	k__Bacteria;p__Firmicutes;c__Clostridia;o__Clostridiales;f__Clostridiales_vadinBB60_group;
Lentimicrobiaceae	0	0	0	0	0	0	0	0	0	0	0	0	0	0	0	0	0	0	0	0	0	0	0	0	0	0	0	0	0	0	0	0	0	0	0	0	0	k__Bacteria;p__Bacteroidetes;c__Sphingobacteriia;o__Sphingobacteriales;f__Lentimicrobiaceae;
Alteromonadaceae	0	0	0	0	0	0	0	0	0	0	0	0	0	0	0	0	0	0	0	0	0	0	0	0	0	0	0	0	0	0	0	0	0	0	0	0	0	k__Bacteria;p__Proteobacteria;c__Gammaproteobacteria;o__Alteromonadales;f__Alteromonadaceae;
Cryomorphaceae	0	0	0	0	0	0	0	0	0	0	0	0	0	0	0	0	0	0	0	0	0	0	0	0	0	0	0	0	0	0	0	0	0	0	0	0	0	k__Bacteria;p__Bacteroidetes;c__Flavobacteriia;o__Flavobacteriales;f__Cryomorphaceae;
Gracilibacteraceae	0	0	0	0	0	0	0	0	0	0	0	0	0	0	0	0	0	0	0	0	0	0	0	0	0	0	0	0	0	0	0	0	0	0	0	0	0	k__Bacteria;p__Firmicutes;c__Clostridia;o__Clostridiales;f__Gracilibacteraceae;
Desulfovibrionaceae	0	0	0	0	0	0	0	0	0	0	0	0	0	0	0	0	0	0	0	0	0	0	0	0	0	0	0	0	0	0	0	0	0	0	0	0	0	k__Bacteria;p__Proteobacteria;c__Deltaproteobacteria;o__Desulfovibrionales;f__Desulfovibrionaceae;
Planococcaceae	0	0	0	0	0	0	0	0	0	0	0	0	0	0	0	0	0	0	0	0	0	0	0	0	0	0	0	0	0	0	0	0	0	0	0	0	0	k__Bacteria;p__Firmicutes;c__Bacilli;o__Bacillales;f__Planococcaceae;
Defluviitaleaceae	0	0	0	0	0	0	0	0	0	0	0	0	0	0	0	0	0	0	0	0	0	0	0	0	0	0	0	0	0	0	0	0	0	0	0	0	0	k__Bacteria;p__Firmicutes;c__Clostridia;o__Clostridiales;f__Defluviitaleaceae;
Cellvibrionaceae	0	0	0	0	0	0	0	0	0	0	0	0	0	0	0	0	0	0	0	0	0	0	0	0	0	0	0	0	0	0	0	0	0	0	0	0	0	k__Bacteria;p__Proteobacteria;c__Gammaproteobacteria;o__Cellvibrionales;f__Cellvibrionaceae;
Pseudonocardiaceae	0	0	0	0	0	0	0	0	0	0	0	0	0	0	0	0	0	0	0	0	0	0	0	0	0	0	0	0	0	0	0	0	0	0	0	0	0	k__Bacteria;p__Actinobacteria;c__unidentified_Actinobacteria;o__Pseudonocardiales;f__Pseudonocardiaceae;
Nakamurellaceae	0	0	0	0	0	0	0	0	0	0	0	0	0	0	0	0	0	0	0	0	0	0	0	0	0	0	0	0	0	0	0	0	0	0	0	0	0	k__Bacteria;p__Actinobacteria;c__unidentified_Actinobacteria;o__Frankiales;f__Nakamurellaceae;
Chitinophagaceae	0	0	0	0	0	0	0	0	0	0	0	0	0	0	0	0	0	0	0	0	0	0	0	0	0	0	0	0	0	0	0	0	0	0	0	0	0	k__Bacteria;p__Bacteroidetes;c__Sphingobacteriia;o__Sphingobacteriales;f__Chitinophagaceae;
BIrii41	0	0	0	0	0	0	0	0	0	0	0	0	0	0	0	0	0	0	0	0	0	0	0	0	0	0	0	0	0	0	0	0	0	0	0	0	0	k__Bacteria;p__Proteobacteria;c__Deltaproteobacteria;o__Myxococcales;f__BIrii41;
P3OB-42	0	0	0	0	0	0	0	0	0	0	0	0	0	0	0	0	0	0	0	0	0	0	0	0	0	0	0	0	0	0	0	0	0	0	0	0	0	k__Bacteria;p__Proteobacteria;c__Deltaproteobacteria;o__Myxococcales;f__P3OB-42;
SRB2	0	0	0	0	0	0	0	0	0	0	0	0	0	0	0	0	0	0	0	0	0	0	0	0	0	0	0	0	0	0	0	0	0	0	0	0	0	k__Bacteria;p__Firmicutes;c__Clostridia;o__Thermoanaerobacterales;f__SRB2;
Spongiibacteraceae	0	0	0	0	0	0	0	0	0	0	0	0	0	0	0	0	0	0	0	0	0	0	0	0	0	0	0	0	0	0	0	0	0	0	0	0	0	k__Bacteria;p__Proteobacteria;c__Gammaproteobacteria;o__Cellvibrionales;f__Spongiibacteraceae;
Beutenbergiaceae	0	0	0	0	0	0	0	0	0	0	0	0	0	0	0	0	0	0	0	0	0	0	0	0	0	0	0	0	0	0	0	0	0	0	0	0	0	k__Bacteria;p__Actinobacteria;c__unidentified_Actinobacteria;o__Micrococcales;f__Beutenbergiaceae;
Bacteroidales_RF16_group	0	0	0	0	0	0	0	0	0	0	0	0	0	0	0	0	0	0	0	0	0	0	0	0	0	0	0	0	0	0	0	0	0	0	0	0	0	k__Bacteria;p__Bacteroidetes;c__Bacteroidia;o__Bacteroidales;f__Bacteroidales_RF16_group;
Thiotrichaceae	0	0	0	0	0	0	0	0	0	0	0	0	0	0	0	0	0	0	0	0	0	0	0	0	0	0	0	0	0	0	0	0	0	0	0	0	0	k__Bacteria;p__Proteobacteria;c__Gammaproteobacteria;o__Thiotrichales;f__Thiotrichaceae;
Sporichthyaceae	0	0	0	0	0	0	0	0	0	0	0	0	0	0	0	0	0	0	0	0	0	0	0	0	0	0	0	0	0	0	0	0	0	0	0	0	0	k__Bacteria;p__Actinobacteria;c__unidentified_Actinobacteria;o__Frankiales;f__Sporichthyaceae;
Xanthobacteraceae	0	0	0	0	0	0	0	0	0	0	0	0	0	0	0	0	0	0	0	0	0	0	0	0	0	0	0	0	0	0	0	0	0	0	0	0	0	k__Bacteria;p__Proteobacteria;c__Alphaproteobacteria;o__Rhizobiales;f__Xanthobacteraceae;
unidentified_Alphaproteobacteria	0	0	0	0	0	0	0	0	0	0	0	0	0	0	0	0	0	0	0	0	0	0	0	0	0	0	0	0	0	0	0	0	0	0	0	0	0	k__Bacteria;p__Proteobacteria;c__Alphaproteobacteria;o__unidentified_Alphaproteobacteria;f__unidentified_Alphaproteobacteria;
unidentified_Xanthomonadales	0	0	0	0	0	0	0	0	0	0	0	0	0	0	0	0	0	0	0	0	0	0	0	0	0	0	0	0	0	0	0	0	0	0	0	0	0	k__Bacteria;p__Proteobacteria;c__Gammaproteobacteria;o__Xanthomonadales;f__unidentified_Xanthomonadales;
Coxiellaceae	0	0	0	0	0	0	0	0	0	0	0	0	0	0	0	0	0	0	0	0	0	0	0	0	0	0	0	0	0	0	0	0	0	0	0	0	0	k__Bacteria;p__Proteobacteria;c__Gammaproteobacteria;o__Legionellales;f__Coxiellaceae;
Rickettsiaceae	0	0	0	0	0	0	0	0	0	0	0	0	0	0	0	0	0	0	0	0	0	0	0	0	0	0	0	0	0	0	0	0	0	0	0	0	0	k__Bacteria;p__Proteobacteria;c__Alphaproteobacteria;o__Rickettsiales;f__Rickettsiaceae;
Cryptosporangiaceae	0	0	0	0	0	0	0	0	0	0	0	0	0	0	0	0	0	0	0	0	0	0	0	0	0	0	0	0	0	0	0	0	0	0	0	0	0	k__Bacteria;p__Actinobacteria;c__unidentified_Actinobacteria;o__Frankiales;f__Cryptosporangiaceae;
unidentified_Rhizobiales	0	0	0	0	0	0	0	0	0	0	0	0	0	0	0	0	0	0	0	0	0	0	0	0	0	0	0	0	0	0	0	0	0	0	0	0	0	k__Bacteria;p__Proteobacteria;c__Alphaproteobacteria;o__Rhizobiales;f__unidentified_Rhizobiales;
unidentified_Saccharibacteria	0	0	0	0	0	0	0	0	0	0	0	0	0	0	0	0	0	0	0	0	0	0	0	0	0	0	0	0	0	0	0	0	0	0	0	0	0	k__Bacteria;p__Saccharibacteria;c__unidentified_Saccharibacteria;o__unidentified_Saccharibacteria;f__unidentified_Saccharibacteria;
KCM-B-112	0	0	0	0	0	0	0	0	0	0	0	0	0	0	0	0	0	0	0	0	0	0	0	0	0	0	0	0	0	0	0	0	0	0	0	0	0	k__Bacteria;p__Proteobacteria;c__Gammaproteobacteria;o__Acidithiobacillales;f__KCM-B-112;
Acidimicrobiaceae	0	0	0	0	0	0	0	0	0	0	0	0	0	0	0	0	0	0	0	0	0	0	0	0	0	0	0	0	0	0	0	0	0	0	0	0	0	k__Bacteria;p__Actinobacteria;c__Acidimicrobiia;o__Acidimicrobiales;f__Acidimicrobiaceae;
Bacteriovoracaceae	0	0	0	0	0	0	0	0	0	0	0	0	0	0	0	0	0	0	0	0	0	0	0	0	0	0	0	0	0	0	0	0	0	0	0	0	0	k__Bacteria;p__Proteobacteria;c__Deltaproteobacteria;o__Bdellovibrionales;f__Bacteriovoracaceae;
KD1-131	0	0	0	0	0	0	0	0	0	0	0	0	0	0	0	0	0	0	0	0	0	0	0	0	0	0	0	0	0	0	0	0	0	0	0	0	0	k__Bacteria;p__Bacteroidetes;c__Sphingobacteriia;o__Sphingobacteriales;f__KD1-131;
Sanguibacteraceae	0	0	0	0	0	0	0	0	0	0	0	0	0	0	0	0	0	0	0	0	0	0	0	0	0	0	0	0	0	0	0	0	0	0	0	0	0	k__Bacteria;p__Actinobacteria;c__unidentified_Actinobacteria;o__Micrococcales;f__Sanguibacteraceae;
Eubacteriaceae	0	0	0	0	0	0	0	0	0	0	0	0	0	0	0	0	0	0	0	0	0	0	0	0	0	0	0	0	0	0	0	0	0	0	0	0	0	k__Bacteria;p__Firmicutes;c__Clostridia;o__Clostridiales;f__Eubacteriaceae;
Elev-16S-1332	0	0	0	0	0	0	0	0	0	0	0	0	0	0	0	0	0	0	0	0	0	0	0	0	0	0	0	0	0	0	0	0	0	0	0	0	0	k__Bacteria;p__Actinobacteria;c__Thermoleophilia;o__Solirubrobacterales;f__Elev-16S-1332;
288-2	0	0	0	0	0	0	0	0	0	0	0	0	0	0	0	0	0	0	0	0	0	0	0	0	0	0	0	0	0	0	0	0	0	0	0	0	0	k__Bacteria;p__Actinobacteria;c__Thermoleophilia;o__Solirubrobacterales;f__288-2;
Helicobacteraceae	0	0	0	0	0	0	0	0	0	0	0	0	0	0	0	0	0	0	0	0	0	0	0	0	0	0	0	0	0	0	0	0	0	0	0	0	0	k__Bacteria;p__Proteobacteria;c__Epsilonproteobacteria;o__Campylobacterales;f__Helicobacteraceae;
Hyphomonadaceae	0	0	0	0	0	0	0	0	0	0	0	0	0	0	0	0	0	0	0	0	0	0	0	0	0	0	0	0	0	0	0	0	0	0	0	0	0	k__Bacteria;p__Proteobacteria;c__Alphaproteobacteria;o__Caulobacterales;f__Hyphomonadaceae;
Gaiellaceae	0	0	0	0	0	0	0	0	0	0	0	0	0	0	0	0	0	0	0	0	0	0	0	0	0	0	0	0	0	0	0	0	0	0	0	0	0	k__Bacteria;p__Actinobacteria;c__Thermoleophilia;o__Gaiellales;f__Gaiellaceae;
Cyclobacteriaceae	0	0	0	0	0	0	0	0	0	0	0	0	0	0	0	0	0	0	0	0	0	0	0	0	0	0	0	0	0	0	0	0	0	0	0	0	0	k__Bacteria;p__Bacteroidetes;c__Cytophagia;o__Cytophagales;f__Cyclobacteriaceae;
Family_XVIII	0	0	0	0	0	0	0	0	0	0	0	0	0	0	0	0	0	0	0	0	0	0	0	0	0	0	0	0	0	0	0	0	0	0	0	0	0	k__Bacteria;p__Firmicutes;c__Clostridia;o__Clostridiales;f__Family_XVIII;
Family_XII	0	0	0	0	0	0	0	0	0	0	0	0	0	0	0	0	0	0	0	0	0	0	0	0	0	0	0	0	0	0	0	0	0	0	0	0	0	k__Bacteria;p__Firmicutes;c__Bacilli;o__Bacillales;f__Family_XII;
Iamiaceae	0	0	0	0	0	0	0	0	0	0	0	0	0	0	0	0	0	0	0	0	0	0	0	0	0	0	0	0	0	0	0	0	0	0	0	0	0	k__Bacteria;p__Actinobacteria;c__Acidimicrobiia;o__Acidimicrobiales;f__Iamiaceae;
Nevskiaceae	0	0	0	0	0	0	0	0	0	0	0	0	0	0	0	0	0	0	0	0	0	0	0	0	0	0	0	0	0	0	0	0	0	0	0	0	0	k__Bacteria;p__Proteobacteria;c__Gammaproteobacteria;o__Xanthomonadales;f__Nevskiaceae;
Nocardiopsaceae	0	0	0	0	0	0	0	0	0	0	0	0	0	0	0	0	0	0	0	0	0	0	0	0	0	0	0	0	0	0	0	0	0	0	0	0	0	k__Bacteria;p__Actinobacteria;c__unidentified_Actinobacteria;o__Streptosporangiales;f__Nocardiopsaceae;
Beijerinckiaceae	0	0	0	0	0	0	0	0	0	0	0	0	0	0	0	0	0	0	0	0	0	0	0	0	0	0	0	0	0	0	0	0	0	0	0	0	0	k__Bacteria;p__Proteobacteria;c__Alphaproteobacteria;o__Rhizobiales;f__Beijerinckiaceae;
Synergistaceae	0	0	0	0	0	0	0	0	0	0	0	0	0	0	0	0	0	0	0	0	0	0	0	0	0	0	0	0	0	0	0	0	0	0	0	0	0	k__Bacteria;p__Synergistetes;c__Synergistia;o__Synergistales;f__Synergistaceae;
Desulfobulbaceae	0	0	0	0	0	0	0	0	0	0	0	0	0	0	0	0	0	0	0	0	0	0	0	0	0	0	0	0	0	0	0	0	0	0	0	0	0	k__Bacteria;p__Proteobacteria;c__Deltaproteobacteria;o__Desulfobacterales;f__Desulfobulbaceae;
Parvularculaceae	0	0	0	0	0	0	0	0	0	0	0	0	0	0	0	0	0	0	0	0	0	0	0	0	0	0	0	0	0	0	0	0	0	0	0	0	0	k__Bacteria;p__Proteobacteria;c__Alphaproteobacteria;o__Parvularculales;f__Parvularculaceae;
Legionellaceae	0	0	0	0	0	0	0	0	0	0	0	0	0	0	0	0	0	0	0	0	0	0	0	0	0	0	0	0	0	0	0	0	0	0	0	0	0	k__Bacteria;p__Proteobacteria;c__Gammaproteobacteria;o__Legionellales;f__Legionellaceae;
[truncated: 4 more columns]
