# Supplementary material for: Comparison of Blood Bacterial Communities in Periodontal Health and Periodontal Disease
Source: Front Cell Infect Microbiol. 2021 Jan 5;10:577485. doi: 10.3389/fcimb.2020.577485 (PMC7813997; doi:10.3389/fcimb.2020.577485)
Supplement: Supplementary Table 6 — Relative Abundance (Genus). [file Table_6.xlsx]

## Sheet: otu_table.g.relative
MolYis (Genus)																																																	Total DNA (Genus)
Taxonomy	WB.87.C	WB.90.C	WB.93.C	WB.94.C	WB.95.C	WB.96.C	WB.105.C	WB.108.C	WB.110.C	WB.111.C	WB.113.C	WB.114.C	WB.115.C	WB.117.C	WB.118.C	WB.119.C	WB.121.C	WB.122.C	WB.123.C	WB.84.P	WB.88.P	WB.89.P	WB.91.P	WB.92.P	WB.97.P	WB.98.P	WB.99.P	WB.100.P	WB.101.P	WB.102.P	WB.103.P	WB.104.P	WB.106.P	WB.107.P	WB.109.P	WB.112.P	Average	Tax_detail											Taxonomy
Streptococcus	0.195131	0.235108	0.551763	0.201747	0.117371	0.652964	0.268297	0.281303	0.394393	0.332684	0.175164	0.208428	0.276796	0.146601	0.158241	0.725281	0.221854	0.446451	0.253763	0.262358	0.198229	0.162781	0.273665	0.19568	0.305563	0.362839	0.203468	0.435704	0.203049	0.146364	0.283154	0.245231	0.407174	0.335169	0.696825	0.198993	0.298877	k__Bacteria;p__Firmicutes;c__Bacilli;o__Lactobacillales;f__Streptococcaceae;g__Streptococcus;											Streptococcus
Staphylococcus	0.11353	0.399137	0.10302	0.123923	0.199714	0.0579648	0.317935	0.164965	0.102471	0.250062	0.202737	0.171323	0.344077	0.201016	0.0360828	0.0106183	0.304896	0.135337	0.214883	0.307844	0.352555	0.269728	0.135595	0.33716	0.132013	0.109464	0.17142	0.0971351	0.295128	0.433768	0.264575	0.234656	0.201467	0.290835	0.0328876	0.277248	0.205477	k__Bacteria;p__Firmicutes;c__Bacilli;o__Bacillales;f__Staphylococcaceae;g__Staphylococcus;											Acidovorax
Others	0.0108227	0.00486267	0.0315536	0.23215	0.0529622	0.0878939	0.0187514	0.0110701	0.0436565	0.0736394	0.036384	0.0189235	0.0140394	0.118307	0.556292	0.0435489	0.020903	0.0140071	0.0116941	0.017568	0.0301873	0.0123934	0.0679483	0.0352113	0.0164169	0.121782	0.040386	0.0879046	0.0561897	0.0272396	0.0699601	0.0523168	0.0274117	0.00641184	0.0415694	0.0321022	0.0595683	Others											Others
Corynebacterium_1	0.050305	0.0494766	0.0287565	0.0582445	0.0924768	0.0123396	0.0188375	0.107882	0.0223016	0.0584704	0.0410207	0.0461416	0.0424838	0.0513593	0.0211397	0.00230224	0.0218605	0.018816	0.0575345	0.0767485	0.045055	0.0907771	0.121567	0.147107	0.0860758	0.00760599	0.0522737	0.0163416	0.0818801	0.0463352	0.0862479	0.0120061	0.0382021	0.0340064	0.00528224	0.024464	0.0492701	k__Bacteria;p__Actinobacteria;c__unidentified_Actinobacteria;o__Corynebacteriales;f__Corynebacteriaceae;g__Corynebacterium_1;											Haemophilus
Haemophilus	4.30325e-05	0.00135552	0.0180737	0.219261	0.00139856	0.0133078	0.0649468	0.0134261	0.00441083	0.00183964	0.126053	0.00548664	0.00923047	0.00168903	0.00409885	0.108861	0.011877	0.0296279	0.00338881	0.00578787	0.00171054	0.0593526	0.0826439	0.00258195	0.0255936	0.0828591	0.00444311	0.0590621	0.00248513	0.00306607	0.000720794	0.0546835	0.00749841	0.018192	0.0977376	0.0150614	0.0322738	k__Bacteria;p__Proteobacteria;c__Gammaproteobacteria;o__Pasteurellales;f__Pasteurellaceae;g__Haemophilus;											Methylobacterium
Caldalkalibacillus	0.0137381	0.0196013	0.00324895	0.00632578	0.0109733	0.0102633	0.022861	0.0280357	0.00913365	0.027842	0.0626015	0.053683	0.0393209	0.0321883	0.00551892	0.00228072	0.0264435	0.015567	0.0202898	0.0311448	0.0177509	0.027756	0.0427851	0.0216669	0.0408163	0.0343937	0.023442	0.00799329	0.0102095	0.0341893	0.0279496	0.0113498	0.015836	0.0258303	0.0056265	0.0218175	0.0225132	k__Bacteria;p__Firmicutes;c__Bacilli;o__Bacillales;f__Bacillaceae;g__Caldalkalibacillus;											Kocuria
Acinetobacter	0.00875711	0.0237001	0.00850968	0.00389444	0.0218282	0.0120814	0.0174497	0.000591697	0.00225921	0.000484116	0.00201177	0.00696051	0.000978989	0.00110809	0.00712188	0.000580939	0.0967586	0.0586641	0.0276699	0.0130711	0.0195368	0.00157069	0.00108657	0.00181812	0.077168	0.0291115	0.178467	0.0352651	0.0606113	0.00245285	0.00130173	0.0126193	0.0230009	0.0288856	0.00101126	0.0066808	0.0220852	k__Bacteria;p__Proteobacteria;c__Gammaproteobacteria;o__Pseudomonadales;f__Moraxellaceae;g__Acinetobacter;											Prevotella_7
Propionibacterium	0.00570181	0.00889697	0.00286166	0.0075522	0.00484116	0.00537906	0.00904758	0.0303379	0.00890773	0.0102848	0.0523706	0.109722	0.0151905	0.0316612	0.00359321	0.000720794	0.0273687	0.0291653	0.0133939	0.0131787	0.0372016	0.0287887	0.0105322	0.00620744	0.014502	0.0087356	0.00810087	0.0139533	0.0156853	0.00471206	0.0100588	0.0199778	0.0247329	0.00462599	0.00594924	0.0339957	0.0177204	k__Bacteria;p__Actinobacteria;c__unidentified_Actinobacteria;o__Propionibacteriales;f__Propionibacteriaceae;g__Propionibacterium;											Corynebacterium_1
Bacillus	0.00191495	0.00199025	0.00206556	0.0135445	0.0463568	0.00514238	0.00716491	0.0345766	0.0081439	0.010586	0.0489925	0.0280787	0.0364055	0.0116726	0.00628275	0.000849892	0.00229148	0.00826224	0.013254	0.00600303	0.0157176	0.0508644	0.0164599	0.010941	0.0189128	0.0146741	0.0161479	0.00599228	0.000828376	0.0297785	0.00757372	0.0210859	0.00234527	0.00316289	0.00391596	0.0301873	0.0150602	k__Bacteria;p__Firmicutes;c__Bacilli;o__Bacillales;f__Bacillaceae;g__Bacillus;											Staphylococcus
Actinomyces	0.0309942	0.00265726	0.042656	0.0057556	0.00763827	0.00263574	0.00351791	0.0116403	0.00405581	0.016234	0.0159328	0.0106183	0.00203329	0.0194292	0.00234527	0.0154164	0.00738007	0.0457973	0.0114789	0.0148247	0.00240982	0.0190096	0.0171915	0.00102202	0.0044969	0.00804708	0.019838	0.0546728	0.00934881	0.04995	0.000892924	0.00222693	0.00136628	0.0209568	0.00944563	0.00217314	0.0137803	k__Bacteria;p__Actinobacteria;c__unidentified_Actinobacteria;o__Actinomycetales;f__Actinomycetaceae;g__Actinomyces;											Neisseria
Anoxybacillus	0.0163093	0.0118339	0.00139856	0.00809011	0.0170086	0.00398051	0.0151044	0.0211505	0.00208708	0.0123073	0.0173636	0.0263897	0.0268846	0.0314998	0.00210859	0.00117264	0.0028509	0.00829451	0.00909062	0.0257657	0.0147386	0.0062182	0.0166643	0.00137704	0.00599228	0.00857423	0.0193431	0.00844513	0.010898	0.0123611	0.0193108	0.00792874	0.0128667	0.00684217	0.00226996	0.015212	0.011937	k__Bacteria;p__Firmicutes;c__Bacilli;o__Bacillales;f__Bacillaceae;g__Anoxybacillus;											Escherichia-Shigella
Corynebacterium	0.331501	0.000150614	0.000129098	0.000161372	0.0210752	0.000161372	0.000333502	0.000322744	0.00226996	0.000311986	0.000355018	0.000451841	0.00474433	0	0	7.53069e-05	0.000107581	0.000215163	0.00763827	0.00104354	0	0	0.000161372	0.00017213	0.000225921	0.000473358	0.000268953	0.00977914	0.000193646	0.000193646	0.000355018	0.000215163	0.0172238	0.000301228	0.000311986	0.000129098	0.0111403	k__Bacteria;p__Actinobacteria;c__unidentified_Actinobacteria;o__Corynebacteriales;f__Corynebacteriaceae;g__Corynebacterium;											Porphyromonas
Prevotella	0.00672383	7.53069e-05	0.000268953	0.00051639	0.000419567	0.00136628	0.000925199	0.0155025	0.00107581	0.000290469	0.000817618	0.0087356	0.0271427	0.00034426	0.000215163	0.000451841	0.0092735	0.000656246	5.37906e-05	2.15163e-05	0.00327047	0.00871408	0.000225921	0.0263251	0.086689	0.000527148	0.0182458	0.00068852	0.000236679	0.0299076	0.0161695	0.058933	0.00777812	0.000677762	0.000473358	0.0218928	0.00987865	k__Bacteria;p__Bacteroidetes;c__Bacteroidia;o__Bacteroidales;f__Prevotellaceae;g__Prevotella;											Rothia
Lactobacillus	0.0130819	0.0113283	0.00163524	0.0062182	0.0375459	0.00476585	0.0109625	0.0078104	0.00248513	0.0201607	0.017213	0.0323282	0.00841285	0.00034426	0.00195798	0.00034426	0.000484116	0.0017213	0.00861726	0.0102848	0.00783192	0.0131679	0.0155455	0.00462599	0.00349639	0.00983293	0.0222263	0.00590621	0.00358246	0.00115112	0.00711112	0.00913365	0.018192	0.0134477	0.00342108	0.00807935	0.00956816	k__Bacteria;p__Firmicutes;c__Bacilli;o__Lactobacillales;f__Lactobacillaceae;g__Lactobacillus;											Alloprevotella
Halomonas	0.0203113	0.000441083	0.000591697	0.000613213	0.0209568	0.00245285	0.0300905	0.0271427	0.00488419	0.00418491	0.00627199	0.0161479	0.0316396	0.0110378	0.00100051	0.00068852	0.00797177	0.00903683	0.00504556	0.00160296	0.000796101	0.00899379	0.000527148	0.0281002	0.0129851	0.00221617	0.0018504	0.0228933	0.00034426	0.000548664	0.000753069	0.00182888	0.00145235	0.00109733	0.00147386	0.0267124	0.00874128	k__Bacteria;p__Proteobacteria;c__Gammaproteobacteria;o__Oceanospirillales;f__Halomonadaceae;g__Halomonas;											Prevotella
Methylobacterium	0	0.0117694	0.00353942	0.00228072	0.000139856	0.000978989	0.000634729	0.00068852	0.131249	0.000753069	0.00201177	0.00181812	0.00149538	0.00901531	0.000494874	0.000408809	0.000247437	0.000150614	2.15163e-05	1.07581e-05	0.000473358	0.000322744	0.00034426	0.000129098	0.00996202	0.000774585	0.0258948	0.000161372	0.0642906	0.00348563	0.000215163	0.000763827	0.000634729	0.000602455	0.00391596	0.00200101	0.00782444	k__Bacteria;p__Proteobacteria;c__Alphaproteobacteria;o__Rhizobiales;f__Methylobacteriaceae;g__Methylobacterium;											Acinetobacter
Fusobacterium	7.53069e-05	0.0012587	0.00874636	0.00327047	0.000150614	0.0158037	0.000430325	0.000935957	0.000182888	0.000182888	0.00086065	0.0636989	0.00034426	0.00796101	0.000731553	0.00051639	0.00415264	0.000258195	0.012942	0.0191495	0.0349962	0.0115865	0.000268953	0.0188052	0.00225921	0.00828376	0.000301228	0.000430325	0.0201285	0.00117264	9.68231e-05	0.0161157	0.00129098	0.000150614	0.00120491	0.00166751	0.00723364	k__Bacteria;p__Fusobacteria;c__Fusobacteriia;o__Fusobacteriales;f__Fusobacteriaceae;g__Fusobacterium;											Actinomyces
Finegoldia	0.0404183	0.00626123	0.00139856	0.00102202	0.000129098	0.000699278	0.00558347	0.00164599	0.00164599	0.00168903	0.00916592	0.0507246	0.00982217	0.000333502	0.0015922	0.000365776	0.0178692	0.0012587	0.00407733	0.000376534	0.000484116	0.000527148	0.000398051	0.000107581	0.000656246	0.00179661	0.00951018	0.0076813	0.00616441	0.0104569	0.00545437	0.00175357	0.0231192	0.00846664	0.00168903	0.0236679	0.007167	k__Bacteria;p__Firmicutes;c__Clostridia;o__Clostridiales;f__Family_XI;g__Finegoldia;											Tepidimonas
Gemella	8.6065e-05	0.00352867	0.00798253	0.00604607	0.000731553	0.0352974	0.000978989	0.0393855	0.0015169	0.00154917	0.00349639	0.00279711	0.002313	0.0170839	0.000710036	0.0158252	0.000591697	0.000129098	3.22744e-05	0.0118555	0.00350715	0.000268953	0.00051639	0.00209783	0.00834831	0.00518542	0.00522845	0.00405581	0.002313	0.016944	0.00051639	0.0232268	0.000882166	0.00648715	0.0167289	0.00486267	0.00703073	k__Bacteria;p__Firmicutes;c__Bacilli;o__Bacillales;f__Family_XI;g__Gemella;											Campylobacter
Porphyromonas	0	0.0134046	0.0023883	0.00325971	0.000645488	0.0143191	0.00338881	9.68231e-05	0.00120491	0.0309081	0.00116188	0.00121567	0.000763827	0.0162233	0.00301228	0.00696051	0.0100266	0.00176433	0.000182888	0	0.0353835	0.00278635	0.000441083	7.53069e-05	0.00584166	0.023442	0.000430325	8.6065e-05	0.000430325	0.000258195	0.00796101	0.00157069	0.02015	0.0110594	0.00550816	0.0248835	0.00697874	k__Bacteria;p__Bacteroidetes;c__Bacteroidia;o__Bacteroidales;f__Porphyromonadaceae;g__Porphyromonas;											Micrococcus
Micrococcus	1.07581e-05	0.00475509	0.000311986	0.00385141	0.0242811	0.000903683	0.0239261	0.00129098	0.00101126	0.0346519	0.0169118	0.00204404	0.000935957	0.00034426	0.00565877	0.000225921	0.00107581	0.0576743	0.000290469	2.15163e-05	0.000279711	0.00154917	8.6065e-05	0.00034426	0.0078104	0.0116188	0.00051639	0.000441083	0.000419567	0.00683141	0.0212473	0.000978989	0.000753069	0.00414188	0.00122643	0.0106183	0.00691777	k__Bacteria;p__Actinobacteria;c__unidentified_Actinobacteria;o__Micrococcales;f__Micrococcaceae;g__Micrococcus;											Sphingomonas
Geobacillus	0.00501329	0.0172668	0.000914441	0.000129098	0.000333502	0.00171054	0.000892924	0.0226996	0.00162448	0.00659473	0.00355018	0.015836	0.0146311	0.0141039	0.00115112	0.000806859	0.00356094	0.00140931	0.0151905	8.6065e-05	0.00786419	0.00933805	0.0274547	0.000817618	0.000268953	0.00249589	0.000925199	0.0026465	0.00395899	0.00813314	0.00472282	0.00157069	0.00478737	0.0134584	0.00155993	0.0182243	0.00654811	k__Bacteria;p__Firmicutes;c__Bacilli;o__Bacillales;f__Bacillaceae;g__Geobacillus;											Fusobacterium
Rothia	1.07581e-05	5.37906e-05	0.0593849	0.00117264	0.031715	0.00287242	0.00479812	0.000398051	0.00625047	0.000785343	0.000731553	0.000656246	0.000430325	0.000258195	4.30325e-05	0.000871408	0.000333502	0.000322744	0.00759524	1.07581e-05	0.00017213	7.53069e-05	4.30325e-05	0.0184825	0.00164599	0.00477661	0.0010543	0.000677762	0.012189	0.0326294	0.00686368	0.013211	0.000903683	0.0109195	0.0048304	0.00602455	0.00647759	k__Bacteria;p__Actinobacteria;c__unidentified_Actinobacteria;o__Micrococcales;f__Micrococcaceae;g__Rothia;											Pseudomonas
Prevotella_7	0	7.53069e-05	0.0455391	0.000182888	0.000161372	0.00413112	0.00796101	0.000236679	0.00292621	2.15163e-05	0.000311986	0.000107581	0.000118339	0.0246899	0.000494874	0.0180306	0.0101664	0.0283692	7.53069e-05	0	0.0205803	0.000225921	0.000236679	0.0253784	0.00214087	0.000322744	0.000591697	0.00419567	0.000473358	8.6065e-05	8.6065e-05	0.0159973	0.000150614	0.000225921	0.0099943	0.000580939	0.00624629	k__Bacteria;p__Bacteroidetes;c__Bacteroidia;o__Bacteroidales;f__Prevotellaceae;g__Prevotella_7;											Paracoccus
Actinobacillus	0.000301228	0.000107581	0.00455069	4.30325e-05	2.15163e-05	6.45488e-05	0.00163524	0.000667004	0.000236679	0.000139856	0.000548664	0.000753069	0.000505632	0.000150614	0.000215163	0.0276161	0.000580939	0.00229148	0.0364485	0.0497456	0	0	0.000118339	0.000225921	0.000150614	0.000430325	0.000258195	0.0476908	0.00395899	0.000548664	0.000247437	0.000494874	0.000946715	0.0203006	0.0207739	0.000225921	0.00619429	k__Bacteria;p__Proteobacteria;c__Gammaproteobacteria;o__Pasteurellales;f__Pasteurellaceae;g__Actinobacillus;											Caldalkalibacillus
Kocuria	0.00658397	0.000462599	0.000441083	0.000322744	0.00867105	0.00396975	0.00718643	0.0115327	0.000290469	0.000559423	0.00191495	0.000817618	0.000355018	0.0436134	0.00246361	0.000731553	0.000989748	0.00164599	0.00532527	6.45488e-05	0.0106828	0.0289286	0.000537906	0.0248728	0.0103386	0.000742311	0.000462599	0.0124579	0.00524997	0.000333502	0.00213011	0.00200101	0.00504556	0.000247437	0.000742311	0.014545	0.00603501	k__Bacteria;p__Actinobacteria;c__unidentified_Actinobacteria;o__Micrococcales;f__Micrococcaceae;g__Kocuria;											Propionibacterium
Aquabacterium	0	0.00379762	1.07581e-05	0.00164599	1.07581e-05	0.000150614	2.15163e-05	0.00116188	0.174077	0.00152765	0.00244209	0.00183964	0.00155993	0.000258195	0.00123718	0	7.53069e-05	2.15163e-05	0	0	9.68231e-05	9.68231e-05	4.30325e-05	0	1.07581e-05	6.45488e-05	0	0	0.000419567	0.0015169	0	0.000150614	4.30325e-05	0	0.0010543	0.00742311	0.00557659	k__Bacteria;p__Proteobacteria;c__Betaproteobacteria;o__Burkholderiales;f__Comamonadaceae;g__Aquabacterium;											Massilia
Alloprevotella	0.0158682	7.53069e-05	0.000107581	4.30325e-05	5.37906e-05	0.000279711	0.010898	0.000129098	0.000182888	0.0119308	0.00862802	0.000311986	0.000279711	0.000365776	0.00108657	0.00382989	0.000215163	0.000107581	1.07581e-05	5.37906e-05	0.000150614	0.00918744	6.45488e-05	2.15163e-05	0.000247437	0.0150614	0.000107581	0.000247437	0.00552968	0.000279711	0.000419567	0.0998139	0.00412036	0.00538982	0.0034426	0.000559423	0.00553057	k__Bacteria;p__Bacteroidetes;c__Bacteroidia;o__Bacteroidales;f__Prevotellaceae;g__Alloprevotella;											Aggregatibacter
Paracoccus	2.15163e-05	0.000118339	0.000301228	0.00353942	3.22744e-05	0.000311986	0.00103278	7.53069e-05	0.000193646	4.30325e-05	0.00129098	0.000129098	8.6065e-05	0.00169978	0.136822	0.000602455	0.000107581	0.000505632	0	0	0.000322744	0.0122643	0.00017213	3.22744e-05	0.000731553	8.6065e-05	3.22744e-05	0.000215163	0.0236571	0.000258195	0.000182888	0.000451841	0.000268953	0.000182888	0.000602455	0.00500253	0.00531601	k__Bacteria;p__Proteobacteria;c__Alphaproteobacteria;o__Rhodobacterales;f__Rhodobacteraceae;g__Paracoccus;											Geobacillus
Neisseria	1.07581e-05	0.000204404	0.0236033	0.00507784	0.000806859	0.000892924	0.000193646	0.000268953	0.00352867	0.0100051	0.000473358	0.00103278	0.000236679	0.0170301	0.000290469	0.00034426	0.00627199	0.00169978	0.0719719	0	0.000236679	1.07581e-05	1.07581e-05	0.000236679	0.000376534	0.000957473	0.000247437	0.000107581	0.000301228	0.000215163	0.0183856	0.000473358	0.000484116	0.000107581	0.000656246	0.000978989	0.00465916	k__Bacteria;p__Proteobacteria;c__Betaproteobacteria;o__Neisseriales;f__Neisseriaceae;g__Neisseria;											Prevotella_2
Pseudomonas	0.0154594	0.00698202	0.00232376	0.0147171	0.000225921	0.000699278	0.0012587	0.000129098	0.000258195	8.6065e-05	0.000699278	0.00300152	0.000247437	0.00017213	0.000161372	0.000204404	0.00350715	0.0133616	0.0112853	0.0105968	0.0215485	0.0269599	0.000796101	0.000215163	0.00102202	0.00108657	0.0141147	0.000118339	0.0131572	0.000311986	0.000118339	0.000333502	0.000548664	0.000301228	0.000333502	0.00110809	0.00465139	k__Bacteria;p__Proteobacteria;c__Gammaproteobacteria;o__Pseudomonadales;f__Pseudomonadaceae;g__Pseudomonas;											Amaricoccus
Anaerococcus	0.0266048	0.000193646	0.00114036	7.53069e-05	0.00579863	0.0049595	0.000505632	7.53069e-05	4.30325e-05	0.000139856	0.000150614	0.000150614	0.00414188	0.000150614	0.00350715	0.000311986	0.00473358	0.00128022	4.30325e-05	0.0128022	0.000236679	0.000301228	0.0254645	0.00405581	0.0109303	0.000236679	0.000914441	0.000129098	0.000161372	0.000204404	0.0217744	0.0116403	0.0116618	0.00404506	3.22744e-05	0.000215163	0.00441143	k__Bacteria;p__Firmicutes;c__Clostridia;o__Clostridiales;f__Family_XI;g__Anaerococcus;											Bacillus
Aggregatibacter	0	0.00034426	0.00533603	0.000107581	3.22744e-05	0.00051639	0.0113713	0.0562865	0.00136628	0.000763827	0.00405581	0.0148892	0.00989748	0.0070896	0.000570181	0.000408809	0.000225921	5.37906e-05	0.000182888	0	0.000204404	4.30325e-05	0.000215163	0.00152765	0.00034426	0.00867105	0.000441083	0.00173206	0.000387293	0.00693899	0.000118339	0.000677762	0.00684217	0.0067561	0.00129098	0.00375459	0.00426231	k__Bacteria;p__Proteobacteria;c__Gammaproteobacteria;o__Pasteurellales;f__Pasteurellaceae;g__Aggregatibacter;											Prevotella_1
Peptoniphilus	0.00982217	0.00816542	9.68231e-05	6.45488e-05	0.0186869	0.000387293	0.0109195	0.000215163	0.000247437	0.00266802	0.000882166	0.00107581	0.0114359	0.000204404	4.30325e-05	0.000215163	0.0336299	0.00179661	0.0285198	0.0104569	0.000225921	0.000204404	0.00256043	5.37906e-05	0.000258195	0.000505632	0.000430325	7.53069e-05	0.000118339	0.000107581	0.000301228	0.000398051	0.00477661	0.000548664	0.000419567	0.000882166	0.00420553	k__Bacteria;p__Firmicutes;c__Clostridia;o__Clostridiales;f__Family_XI;g__Peptoniphilus;											Lactobacillus
Prevotella_2	0.00958549	0.0169118	6.45488e-05	1.07581e-05	0.00660549	0.00263574	0.000139856	7.53069e-05	5.37906e-05	6.45488e-05	0.000193646	0.0125332	7.53069e-05	0.0642798	0.00155993	0.000279711	0.00540058	0.0122858	0.000107581	3.22744e-05	0.00051639	0.000236679	0.000118339	6.45488e-05	0.00452917	0.00034426	6.45488e-05	0.00555119	0.00343184	2.15163e-05	4.30325e-05	0.000580939	0.000204404	5.37906e-05	4.30325e-05	0.00068852	0.00414965	k__Bacteria;p__Bacteroidetes;c__Bacteroidia;o__Bacteroidales;f__Prevotellaceae;g__Prevotella_2;											Prevotella_6
Prevotella_6	0	0	0.00446462	0.000139856	0.00828376	0.00633654	0.000559423	0.0315859	0.00034426	0.00995127	0.027487	0.000451841	0.000451841	0.000139856	8.6065e-05	0.000247437	0.000107581	0.000398051	0.00770282	0	7.53069e-05	0.000161372	3.22744e-05	0.000311986	0.00051639	0.000150614	0.000129098	0.000398051	0.000161372	0.0141039	0.000204404	0.000365776	0.000129098	0.0167827	0.00034426	0.0100158	0.00396168	k__Bacteria;p__Bacteroidetes;c__Bacteroidia;o__Bacteroidales;f__Prevotellaceae;g__Prevotella_6;											Brachybacterium
Rubrobacter	0	0.0011296	0.00378686	6.45488e-05	6.45488e-05	0.000473358	0.00545437	0.0137059	0.00114036	0.00126946	0.00942412	0.0158144	0.00206556	0.000247437	0.000258195	0.000107581	0.000150614	0.000462599	0.000419567	0	0.000753069	0.0113175	0.0409669	0.00601379	0.00100051	0.00160296	0.000333502	0.000828376	0.000161372	0.000107581	9.68231e-05	0.000333502	0.00086065	0.000322744	0.00114036	0.0118447	0.00371454	k__Bacteria;p__Actinobacteria;c__Rubrobacteria;o__Rubrobacterales;f__Rubrobacteriaceae;g__Rubrobacter;											Brevibacterium
Cloacibacterium	0	7.53069e-05	1.07581e-05	3.22744e-05	0.000118339	0.00034426	0.000817618	0.000279711	0.00261422	0.0132002	0.0261315	0.000946715	0.000656246	0.0219896	0.00150614	0.000215163	0.000268953	0.00336729	3.22744e-05	0	0.000376534	0.000462599	0.00750917	0	0.000365776	6.45488e-05	2.15163e-05	4.30325e-05	0.00360397	0.000150614	0.000333502	0.000613213	0.0160942	0.000107581	0.000430325	0.0210967	0.00344111	k__Bacteria;p__Bacteroidetes;c__Flavobacteriia;o__Flavobacteriales;f__Flavobacteriaceae;g__Cloacibacterium;											Carboxydocella
Aeribacillus	4.30325e-05	0.00706809	0.000699278	0.000387293	0.000387293	0.000623971	0.00577711	0.000236679	0.000215163	0.00206556	0.00126946	0.000677762	0.000785343	0.000182888	0.00123718	0.000408809	0.00856347	0.00775661	0.00607834	0.00446462	0.000623971	0.0064226	0.0139103	0.00724022	0.0101879	0.00101126	0.00658397	0.000441083	0.000290469	0.00740159	0.00051639	0.000645488	0.00339957	0.0154379	0.000333502	0.000408809	0.00343842	k__Bacteria;p__Firmicutes;c__Bacilli;o__Bacillales;f__Bacillaceae;g__Aeribacillus;											Mesorhizobium
Hydrogenophaga	0	0	0.000279711	0.000505632	0.0939399	0.000710036	0	0	0	0.000602455	1.07581e-05	0	0	0	0	0	0	0	0	0	0	0	0	0.00034426	0.000667004	0.00051639	0.000699278	0	0	0	0.000333502	0	0	0	0	0	0.00273914	k__Bacteria;p__Proteobacteria;c__Betaproteobacteria;o__Burkholderiales;f__Comamonadaceae;g__Hydrogenophaga;											Gemella
Enterobacter	6.45488e-05	0.000193646	0.00118339	0.0028509	0.000441083	0.000882166	0.00132325	0.020462	0.00660549	0.00450765	0.00373307	0.00206556	0.000903683	0.00478737	0.000484116	0.000204404	0.00715415	0.000903683	0.00373307	0.00346412	0.000376534	0.00485191	8.6065e-05	0.0013878	0.00515314	0.00991899	0.000279711	0.000785343	0.00103278	0.00111885	0.000204404	0.000419567	0.000258195	4.30325e-05	0.00101126	0.00371155	0.00268296	k__Bacteria;p__Proteobacteria;c__Gammaproteobacteria;o__Enterobacteriales;f__Enterobacteriaceae;g__Enterobacter;											Cloacibacterium
Paenibacillus	0	0.012587	0.000161372	8.6065e-05	0.000139856	0.000419567	0.00034426	0.000451841	0.000333502	0.000548664	0.0010543	0.0143298	0.000839134	0.000215163	0	5.37906e-05	0.000828376	0.00119415	0.0193001	0	0.000376534	0.000376534	0.000301228	0.000118339	0.000279711	0.00916592	0.00427098	0.00017213	0.000118339	0.000150614	0.000236679	0.00051639	0.0132648	0.000355018	0.000398051	0.00842361	0.00253922	k__Bacteria;p__Firmicutes;c__Bacilli;o__Bacillales;f__Paenibacillaceae;g__Paenibacillus;											Nocardioides
Treponema_2	0	1.07581e-05	0.000839134	0.00452917	7.53069e-05	0.000129098	0.000301228	0.000150614	0.000161372	0.0113283	0.0181705	0.000311986	0.000268953	0.0131572	7.53069e-05	5.37906e-05	0.000118339	0.000290469	0.0141039	0	2.15163e-05	9.68231e-05	1.07581e-05	8.6065e-05	0.000268953	0.0141147	0.0113175	0	0	1.07581e-05	2.15163e-05	4.30325e-05	3.22744e-05	2.15163e-05	0.000107581	0.000247437	0.00251322	k__Bacteria;p__Spirochaetes;c__unidentified_Spirochaetes;o__Spirochaetales;f__Spirochaetaceae;g__Treponema_2;											Kytococcus
Escherichia-Shigella	0.00443235	0.00442159	0.00136628	8.6065e-05	0.000161372	0.00017213	0.00738007	6.45488e-05	3.22744e-05	0.00123718	0.000365776	0.000419567	0.000204404	2.15163e-05	0.000129098	0.000193646	1.07581e-05	0.000247437	0.000107581	0.00955322	0.000301228	0.00658397	0.000387293	0.000129098	0.000430325	0.00824072	0.000182888	0.000473358	0.00611062	0.000408809	0.000462599	0.000591697	0.00488419	0.0207309	0.000258195	0.000107581	0.00224695	k__Bacteria;p__Proteobacteria;c__Gammaproteobacteria;o__Enterobacteriales;f__Enterobacteriaceae;g__Escherichia-Shigella;											Diaphorobacter
Sphingomonas	0	0.00429249	0.000236679	0.000139856	8.6065e-05	0.000139856	0.000527148	0.000602455	0.00258195	0.000355018	0.0011296	0.000806859	0.0265941	0.000236679	0.00724022	0.000494874	0	0.000150614	1.07581e-05	1.07581e-05	0.00486267	0.000322744	0.000699278	0.000150614	0.00522845	0.000236679	0.00291545	0.00974686	0.0073478	0.000204404	0.000107581	0.000215163	0.000333502	0.00100051	0.000505632	0.000602455	0.00222544	k__Bacteria;p__Proteobacteria;c__Alphaproteobacteria;o__Sphingomonadales;f__Sphingomonadaceae;g__Sphingomonas;											Bradyrhizobium
Turicella	0	0.000161372	0.000236679	0.00928426	0.000107581	0.000613213	0.000225921	4.30325e-05	9.68231e-05	1.07581e-05	0.000204404	0.000236679	3.22744e-05	0.000215163	1.07581e-05	0	0.00481964	0.000193646	0.00555119	0	0.0153411	0.000204404	9.68231e-05	5.37906e-05	0.00513163	0.00034426	0.000118339	4.30325e-05	0.0139103	0.000139856	8.6065e-05	0.000462599	0.0121567	0.000139856	0.000225921	0.00904758	0.0022096	k__Bacteria;p__Actinobacteria;c__unidentified_Actinobacteria;o__Corynebacteriales;f__Corynebacteriaceae;g__Turicella;											Capnocytophaga
Nesterenkonia	1.07581e-05	0.000107581	0.000139856	0.000139856	0.000408809	0.000892924	0.0127376	0.000279711	0.000204404	0.000365776	0.00104354	0.000548664	0.00279711	0.000537906	0.00230224	0.000193646	0.00177509	0.0010543	0.0135875	0	0.000268953	0.000215163	0.000118339	0.00727249	0.00726173	0.000376534	0.000311986	0.00017213	0.000204404	0.000150614	0.00683141	0.000699278	0.000311986	0.000236679	0.000118339	0.0118555	0.00209813	k__Bacteria;p__Actinobacteria;c__unidentified_Actinobacteria;o__Micrococcales;f__Micrococcaceae;g__Nesterenkonia;											Anoxybacillus
Enhydrobacter	0.000118339	3.22744e-05	0.0026465	0.000247437	5.37906e-05	0.000634729	0	0.000107581	0.0054974	9.68231e-05	0.000215163	0.000322744	0.000215163	0.0151367	0.000365776	0.000268953	0.000473358	0.000365776	0.0099943	0.0275623	0.000182888	2.15163e-05	0.00108657	4.30325e-05	0.000118339	0.000225921	0.00584166	0	7.53069e-05	0.000118339	0	0.000322744	5.37906e-05	3.22744e-05	0.000290469	0.000720794	0.00204135	k__Bacteria;p__Proteobacteria;c__Gammaproteobacteria;o__Pseudomonadales;f__Moraxellaceae;g__Enhydrobacter;											Corynebacterium
Ezakiella	0	0.000301228	2.15163e-05	1.07581e-05	2.15163e-05	0.000247437	0.000182888	0	0	0	0	0.000118339	0.000215163	0.000139856	0	7.53069e-05	0.0351576	0.000935957	0.000398051	0	0.000537906	0.00034426	0.0181382	1.07581e-05	3.22744e-05	0.00273256	0.000204404	3.22744e-05	5.37906e-05	4.30325e-05	7.53069e-05	0.000398051	0.0034426	0.00508859	0	0.00051639	0.00192989	k__Bacteria;p__Firmicutes;c__Clostridia;o__Clostridiales;f__Family_XI;g__Ezakiella;											Treponema_2
Leptotrichia	0	5.37906e-05	0.00249589	2.15163e-05	0.000129098	6.45488e-05	0.000182888	4.30325e-05	0	6.45488e-05	4.30325e-05	0.000118339	0	0	0	0	0.000118339	0.00486267	0.0187407	1.07581e-05	0	0.000365776	0	0.0111131	0.000107581	0.000268953	0.000107581	0.00017213	0.000247437	7.53069e-05	0.0137919	0.000118339	0.0098652	0.000118339	0.000763827	1.07581e-05	0.00177987	k__Bacteria;p__Fusobacteria;c__Fusobacteriia;o__Fusobacteriales;f__Leptotrichiaceae;g__Leptotrichia;											Leptotrichia
Lactococcus	3.22744e-05	0.00144159	0	0	0.000236679	0.000494874	0.000473358	0.000322744	8.6065e-05	0.000570181	0.000258195	0.000247437	0.000225921	0.000301228	0	2.15163e-05	0.000279711	0	0	2.15163e-05	0.0079395	0.000279711	0.00466903	8.6065e-05	0	1.07581e-05	7.53069e-05	0.00620744	0.000236679	0.000215163	0.0189343	0.000871408	0.000322744	0.000494874	0.000107581	0.0123181	0.00160505	k__Bacteria;p__Firmicutes;c__Bacilli;o__Lactobacillales;f__Streptococcaceae;g__Lactococcus;											Pantoea
Serratia	0	0.000268953	0.000161372	0.00783192	0.00546513	0.000494874	0.000129098	0.000279711	0.000925199	0.0050348	0.000355018	0.000419567	0.00017213	0.000129098	0	0	0.000494874	0.000462599	0.00679914	0	0.0188375	0.000376534	0.000215163	0.000301228	0.000387293	0.000398051	0.000279711	0.00479812	5.37906e-05	0.000161372	0.000301228	0.00017213	0.000161372	6.45488e-05	0.000118339	0.000580939	0.00157308	k__Bacteria;p__Proteobacteria;c__Gammaproteobacteria;o__Enterobacteriales;f__Enterobacteriaceae;g__Serratia;											Variovorax
Brevibacterium	3.22744e-05	0.000236679	0.000139856	0.000118339	0.00017213	0.000322744	0.000182888	0.000129098	0	0	0.000537906	0.000139856	0	7.53069e-05	0.00017213	9.68231e-05	0.00347487	0.000892924	0.00728325	0	0.000258195	0.0193216	0.000247437	0.0117801	0.0060891	0.000623971	0.000182888	4.30325e-05	0	0	0	5.37906e-05	4.30325e-05	0	0	7.53069e-05	0.0014646	k__Bacteria;p__Actinobacteria;c__unidentified_Actinobacteria;o__Micrococcales;f__Brevibacteriaceae;g__Brevibacterium;											Pelomonas
Stenotrophomonas	0	6.45488e-05	6.45488e-05	0.000107581	0.000774585	0.000376534	0.000107581	0.000473358	0.000107581	0.000204404	0.000311986	0.000398051	0.00937033	9.68231e-05	0	0.00017213	0.00870332	0.000441083	0.00764903	0	6.45488e-05	0	0.000225921	0.011963	0.000193646	0.000333502	0.000473358	0.00817618	8.6065e-05	8.6065e-05	0.000129098	0.000215163	0.000150614	0.00034426	0.000139856	0.000430325	0.00145653	k__Bacteria;p__Proteobacteria;c__Gammaproteobacteria;o__Xanthomonadales;f__Xanthomonadaceae;g__Stenotrophomonas;											Sphingobium
Atopobium	0	0.000182888	0.000182888	0.00017213	0.00017213	0.000398051	0.000645488	0	0	0	0.00086065	0	0	0.00017213	0.0012587	1.07581e-05	9.68231e-05	0.000387293	0	2.15163e-05	0.000268953	0.0137059	0.000225921	0.000150614	0.0214517	0.000311986	0.000258195	3.22744e-05	2.15163e-05	5.37906e-05	5.37906e-05	0.0073478	8.6065e-05	3.22744e-05	0	0.000107581	0.00135194	k__Bacteria;p__Actinobacteria;c__Coriobacteriia;o__Coriobacteriales;f__Coriobacteriaceae;g__Atopobium;											Acidiphilium
Lachnoanaerobaculum	0	0.000355018	7.53069e-05	0.000139856	0.000129098	0.000398051	0	4.30325e-05	0.000451841	1.07581e-05	4.30325e-05	0.000322744	2.15163e-05	0.000182888	0	0.000129098	0.00379762	0.000473358	0.00777812	0	0.0168149	0.000279711	0.000322744	0.00252816	0.000182888	0.0105968	0.00017213	5.37906e-05	0	2.15163e-05	0	0.000107581	0.000129098	0	5.37906e-05	0.000268953	0.00127454	k__Bacteria;p__Firmicutes;c__Clostridia;o__Clostridiales;f__Lachnospiraceae;g__Lachnoanaerobaculum;											Burkholderia-Paraburkholderia
Capnocytophaga	0	0.0198272	5.37906e-05	0	0.0042387	4.30325e-05	0.00363625	0	0	1.07581e-05	2.15163e-05	0.000118339	0	0	2.15163e-05	0	6.45488e-05	0.000182888	0.0040343	0	7.53069e-05	0.000204404	0.000139856	2.15163e-05	0.00379762	0.000204404	1.07581e-05	2.15163e-05	0.00704657	5.37906e-05	4.30325e-05	8.6065e-05	0.00017213	6.45488e-05	3.22744e-05	0	0.00122852	k__Bacteria;p__Bacteroidetes;c__Flavobacteriia;o__Flavobacteriales;f__Flavobacteriaceae;g__Capnocytophaga;											Schlegelella
Prevotella_9	0	0.0316289	0.00228072	1.07581e-05	0	0.000118339	0	5.37906e-05	0	1.07581e-05	7.53069e-05	0.00017213	2.15163e-05	8.6065e-05	0	0	8.6065e-05	0	5.37906e-05	0	0.000355018	0.00017213	0.000225921	1.07581e-05	2.15163e-05	0.000150614	2.15163e-05	0	1.07581e-05	0	0	0.000107581	0.000107581	0	5.37906e-05	0.0076813	0.00120879	k__Bacteria;p__Bacteroidetes;c__Bacteroidia;o__Bacteroidales;f__Prevotellaceae;g__Prevotella_9;											Blastococcus
Massilia	0.0025174	0	0.00130173	6.45488e-05	0.000107581	7.53069e-05	0.000311986	9.68231e-05	0	0	1.07581e-05	0	4.30325e-05	5.37906e-05	0.0021839	7.53069e-05	0	2.15163e-05	0	0.00935957	0	0	6.45488e-05	0.00522845	0.00017213	0.000107581	0.000139856	0.000215163	0.00831603	0.000215163	0.000118339	0.00017213	0.000139856	0.00959625	0.000193646	0	0.00113618	k__Bacteria;p__Proteobacteria;c__Betaproteobacteria;o__Burkholderiales;f__Oxalobacteraceae;g__Massilia;											Brevundimonas
Pantoea	0	4.30325e-05	7.53069e-05	0.00199025	7.53069e-05	0.000451841	0.00291545	9.68231e-05	0.000118339	8.6065e-05	0.000247437	0.000225921	4.30325e-05	0.000247437	1.07581e-05	0	0.0181705	0.00123718	0.00628275	0	0.000193646	0.000193646	0	5.37906e-05	0.000107581	0.000150614	6.45488e-05	0.000118339	0.00244209	9.68231e-05	0.000107581	0.000419567	0.000473358	5.37906e-05	0.000107581	0.00308758	0.00111078	k__Bacteria;p__Proteobacteria;c__Gammaproteobacteria;o__Enterobacteriales;f__Enterobacteriaceae;g__Pantoea;											Rheinheimera
Thermoanaerobacterium	0	0.0021839	1.07581e-05	7.53069e-05	0	0.000139856	0.000817618	0.00758448	0.000677762	0.000935957	0.0138134	0.00200101	0.00107581	0.000161372	0.000225921	0	6.45488e-05	0.000591697	1.07581e-05	0	0.00017213	0.000667004	5.37906e-05	0.000301228	0.000742311	3.22744e-05	0	0.000311986	1.07581e-05	0	0	0.000139856	1.07581e-05	0	0.000935957	0.00617516	0.00110898	k__Bacteria;p__Firmicutes;c__Clostridia;o__Thermoanaerobacterales;f__Family_III;g__Thermoanaerobacterium;											Actinobacillus
Brachybacterium	0	6.45488e-05	0.00104354	0.0104784	0.000150614	0.000247437	8.6065e-05	0	9.68231e-05	1.07581e-05	0.000150614	0	8.6065e-05	3.22744e-05	0.000903683	6.45488e-05	1.07581e-05	0.00260347	0	0	9.68231e-05	0.00899379	0.000182888	0.000129098	0.000505632	0.000204404	0.0130496	0	0	8.6065e-05	0	0	0	8.6065e-05	0.000150614	1.07581e-05	0.00109793	k__Bacteria;p__Actinobacteria;c__unidentified_Actinobacteria;o__Micrococcales;f__Dermabacteraceae;g__Brachybacterium;											Haliangium
Oribacterium	0	0	0.00178585	0.0129528	0.0189451	0.000430325	0	0	0.00017213	0.000161372	0	0	0	0	0	1.07581e-05	0	0	0	0	0	0	0	0.000204404	0.000430325	0.000484116	0.000419567	0	1.07581e-05	5.37906e-05	8.6065e-05	0	0	0	2.15163e-05	0	0.00100469	k__Bacteria;p__Firmicutes;c__Clostridia;o__Clostridiales;f__Lachnospiraceae;g__Oribacterium;											Anaerococcus
Georgenia	0	0	0	3.22744e-05	0	0.00034426	0	1.07581e-05	0.00225921	7.53069e-05	9.68231e-05	5.37906e-05	6.45488e-05	0.0282724	0.000451841	0.000236679	0.000161372	0	0	0	0.0011296	1.07581e-05	1.07581e-05	0	0	0	0	0	0	2.15163e-05	0	0.000322744	0	0	3.22744e-05	0.000613213	0.000950002	k__Bacteria;p__Actinobacteria;c__unidentified_Actinobacteria;o__Micrococcales;f__Bogoriellaceae;g__Georgenia;											Butyricicoccus
Sphingobacterium	0	0	5.37906e-05	1.07581e-05	0	2.15163e-05	0.0233451	1.07581e-05	0	3.22744e-05	0.000161372	2.15163e-05	7.53069e-05	1.07581e-05	3.22744e-05	0.000892924	0	9.68231e-05	0	0.00101126	0	3.22744e-05	1.07581e-05	0	8.6065e-05	2.15163e-05	0.00534679	5.37906e-05	5.37906e-05	9.68231e-05	4.30325e-05	9.68231e-05	8.6065e-05	7.53069e-05	0.00186116	3.22744e-05	0.000935359	k__Bacteria;p__Bacteroidetes;c__Sphingobacteriia;o__Sphingobacteriales;f__Sphingobacteriaceae;g__Sphingobacterium;											Oribacterium
Pseudoxanthomonas	0	0.0122427	0.000161372	8.6065e-05	0.00663776	0.00296924	6.45488e-05	0	0	9.68231e-05	0	0.000225921	0	0.00501329	0.000204404	7.53069e-05	0.000204404	0	5.37906e-05	0	0.000290469	0.000215163	0.000182888	7.53069e-05	0.00017213	0.000311986	0.000161372	1.07581e-05	0.00265726	2.15163e-05	0.000129098	0.000376534	0.000161372	2.15163e-05	7.53069e-05	0.000387293	0.000924601	k__Bacteria;p__Proteobacteria;c__Gammaproteobacteria;o__Xanthomonadales;f__Xanthomonadaceae;g__Pseudoxanthomonas;											Clostridium_sensu_stricto_12
Rhodococcus	0.00693899	0	0.000204404	0.000322744	8.6065e-05	0.000118339	3.22744e-05	0.000204404	0.0057556	8.6065e-05	0.000268953	0.000225921	0.000311986	0	0	4.30325e-05	0	0	0	4.30325e-05	0	1.07581e-05	6.45488e-05	9.68231e-05	0.000182888	9.68231e-05	0.012275	2.15163e-05	0.00330274	0.000290469	1.07581e-05	4.30325e-05	3.22744e-05	0.000161372	0.000559423	0.000193646	0.000888442	k__Bacteria;p__Actinobacteria;c__unidentified_Actinobacteria;o__Corynebacteriales;f__Nocardiaceae;g__Rhodococcus;											Rudaea
Lawsonella	1.07581e-05	0.00017213	0.000408809	0.000290469	8.6065e-05	0.000225921	0.00171054	0.000118339	7.53069e-05	2.15163e-05	0.000258195	0.00116188	0.000882166	0.00051639	4.30325e-05	3.22744e-05	0.000914441	0.00017213	9.68231e-05	0.00244209	0.000107581	0.0044969	0.000118339	0.00239906	0.000322744	0.00869257	0.000925199	0.000699278	0.00130173	0.000473358	5.37906e-05	0.00017213	0.00103278	7.53069e-05	6.45488e-05	8.6065e-05	0.000851685	k__Bacteria;p__Actinobacteria;c__unidentified_Actinobacteria;o__Corynebacteriales;f__Corynebacteriaceae;g__Lawsonella;											Howardella
[Eubacterium]_nodatum_group	0	0.000150614	0	3.22744e-05	0	0	9.68231e-05	0	5.37906e-05	0	0	0	0.000161372	0	0	6.45488e-05	0	0	0	0	0.000182888	0.000279711	0.021882	0	0	0	0.000118339	3.22744e-05	3.22744e-05	0.00713264	6.45488e-05	5.37906e-05	3.22744e-05	0.000150614	0	0	0.0008478	k__Bacteria;p__Firmicutes;c__Clostridia;o__Clostridiales;f__Family_XIII;g__[Eubacterium]_nodatum_group;											Atopobium
Tepidimonas	0	0	0.000107581	0.000150614	0.0203866	0.000279711	0	0	0	0.000182888	1.07581e-05	0	5.37906e-05	0	0	5.37906e-05	0	0	0	0	0	0	5.37906e-05	0.000129098	0.000301228	0.000236679	0.00809011	0	0	0	0.000107581	0	0	7.53069e-05	0	0	0.000839433	k__Bacteria;p__Proteobacteria;c__Betaproteobacteria;o__Burkholderiales;f__Comamonadaceae;g__Tepidimonas;											Nakamurella
Leucobacter	0	0.000225921	0.0011296	1.07581e-05	1.07581e-05	8.6065e-05	0.000139856	0	0	0	0.000322744	0	0	5.37906e-05	0.000129098	0.00017213	0.00426022	0.000430325	5.37906e-05	0	0.000505632	0.0208277	0.000311986	2.15163e-05	0.000225921	1.07581e-05	9.68231e-05	0	1.07581e-05	0	0	5.37906e-05	0	0	9.68231e-05	0.000129098	0.00081433	k__Bacteria;p__Actinobacteria;c__unidentified_Actinobacteria;o__Micrococcales;f__Microbacteriaceae;g__Leucobacter;											Acidibacter
Diaphorobacter	0	0	5.37906e-05	7.53069e-05	0.013878	0.000376534	0	0.000129098	0.000193646	0.000225921	0.000258195	0.000204404	0.000107581	0.000322744	2.15163e-05	0	0.000150614	0.000935957	1.07581e-05	0	0.000129098	0	0	7.53069e-05	0.000107581	0.000129098	0.000129098	0	0	0	4.30325e-05	0.000182888	0	0	6.45488e-05	0.0103278	0.000781458	k__Bacteria;p__Proteobacteria;c__Betaproteobacteria;o__Burkholderiales;f__Comamonadaceae;g__Diaphorobacter;											Dietzia
Carboxydocella	0	0.000118339	9.68231e-05	4.30325e-05	0.0054221	0.000268953	0.000139856	0.00017213	0.000129098	0.000279711	0.000355018	0.00178585	0.000161372	0.000161372	0	0	7.53069e-05	0	5.37906e-05	0	0.000193646	1.07581e-05	0	7.53069e-05	0.000118339	0.000398051	7.53069e-05	0.000118339	6.45488e-05	4.30325e-05	0.000129098	0.000290469	0.00803632	0.000139856	0.000107581	0.00797177	0.000750977	k__Bacteria;p__Firmicutes;c__Clostridia;o__Clostridiales;f__Family_XVI;g__Carboxydocella;											Bacteroides
Hymenobacter	0	0.0067561	0	0	0	4.30325e-05	0.000129098	0	0	0	3.22744e-05	3.22744e-05	0	7.53069e-05	0.00189343	1.07581e-05	3.22744e-05	0	0	0	0.000107581	7.53069e-05	3.22744e-05	0	1.07581e-05	4.30325e-05	0	5.37906e-05	3.22744e-05	4.30325e-05	5.37906e-05	0.0173313	0.000129098	4.30325e-05	0	5.37906e-05	0.000750379	k__Bacteria;p__Bacteroidetes;c__Cytophagia;o__Cytophagales;f__Cytophagaceae;g__Hymenobacter;											Georgenia
Rhizobium	0	9.68231e-05	0.000150614	0.000161372	0.000129098	0.000355018	0.000161372	0	0	0	0.00034426	0	0	7.53069e-05	0.000139856	0	2.15163e-05	0.000236679	0	2.15163e-05	0.00849892	0.000301228	0.000118339	9.68231e-05	0.0151582	0.000236679	0.000193646	0	0	0	0	8.6065e-05	0	0	0	0.000161372	0.000742908	k__Bacteria;p__Proteobacteria;c__Alphaproteobacteria;o__Rhizobiales;f__Rhizobiaceae;g__Rhizobium;											Psychrobacter
Flavobacterium	0	0	3.22744e-05	1.07581e-05	6.45488e-05	6.45488e-05	1.07581e-05	0	0	0	0	0	2.15163e-05	0	0	2.15163e-05	1.07581e-05	0.00235603	0	0	0	1.07581e-05	3.22744e-05	2.15163e-05	0.000129098	6.45488e-05	0.0237862	0	0	0	0	0	0	4.30325e-05	0	0	0.000741115	k__Bacteria;p__Bacteroidetes;c__Flavobacteriia;o__Flavobacteriales;f__Flavobacteriaceae;g__Flavobacterium;											Jeotgalicoccus
Enterococcus	0.000118339	0.000161372	2.15163e-05	3.22744e-05	0	2.15163e-05	0.000107581	2.15163e-05	0.00117264	1.07581e-05	0.000107581	4.30325e-05	8.6065e-05	2.15163e-05	4.30325e-05	9.68231e-05	3.22744e-05	2.15163e-05	0	0.0110701	0.00194722	0.00311986	0.00559423	0	4.30325e-05	0	4.30325e-05	1.07581e-05	0.00164599	6.45488e-05	3.22744e-05	4.30325e-05	3.22744e-05	7.53069e-05	0.000150614	7.53069e-05	0.000724082	k__Bacteria;p__Firmicutes;c__Bacilli;o__Lactobacillales;f__Enterococcaceae;g__Enterococcus;											Aeromonas
Campylobacter	0	0	2.15163e-05	3.22744e-05	0.012856	2.15163e-05	5.37906e-05	0	0	8.6065e-05	0	0	0	3.22744e-05	0	0.000419567	0	0	0	0	0	0	1.07581e-05	4.30325e-05	8.6065e-05	3.22744e-05	6.45488e-05	2.15163e-05	1.07581e-05	3.22744e-05	0.0120599	2.15163e-05	4.30325e-05	9.68231e-05	0	0	0.000723484	k__Bacteria;p__Proteobacteria;c__Epsilonproteobacteria;o__Campylobacterales;f__Campylobacteraceae;g__Campylobacter;											Carnobacterium
Schlegelella	0	0	0	0	0.000193646	0	0.000290469	0	0	0.000204404	0	0	0	0	0	0	0	0	0	0	0	0	0	0	0	0	0	0.000129098	0.000161372	0.000204404	0.0238723	0.000225921	0.000129098	0.000129098	0	0	0.000709439	k__Bacteria;p__Proteobacteria;c__Betaproteobacteria;o__Burkholderiales;f__Comamonadaceae;g__Schlegelella;											Gordonia
Macrococcus	0	0.00831603	0	0.000398051	0	0	0	0.000365776	0.0119308	0.000419567	0.000720794	0.000796101	0.00034426	0	0	0	0	0	3.22744e-05	0	0.000193646	0.000258195	0.00017213	0	0	9.68231e-05	0	0	0	0.000494874	0	0	5.37906e-05	1.07581e-05	0.000182888	0.000591697	0.000704956	k__Bacteria;p__Firmicutes;c__Bacilli;o__Bacillales;f__Staphylococcaceae;g__Macrococcus;											Cellulomonas
Cardiobacterium	0.0155778	0	0	0	0	1.07581e-05	0	0.0070896	0.00017213	0.000182888	0.000484116	0.000301228	0.00017213	0	0	0	0	2.15163e-05	0	0.000161372	0	0	0	0.000311986	0	0	0	0.000301228	0	0	0	0	0	0	0.000193646	0.000333502	0.000703163	k__Bacteria;p__Proteobacteria;c__Gammaproteobacteria;o__Cardiobacteriales;f__Cardiobacteriaceae;g__Cardiobacterium;											Parafilimonas
Chryseobacterium	0	0	3.22744e-05	4.30325e-05	0.0120814	0.000129098	2.15163e-05	0	0	3.22744e-05	3.22744e-05	0	0	6.45488e-05	0.000333502	1.07581e-05	0.00786419	0.00365776	1.07581e-05	1.07581e-05	2.15163e-05	1.07581e-05	0	2.15163e-05	0.000139856	5.37906e-05	0.000107581	0	0	0	2.15163e-05	1.07581e-05	0	0	0	6.45488e-05	0.000688221	k__Bacteria;p__Bacteroidetes;c__Flavobacteriia;o__Flavobacteriales;f__Flavobacteriaceae;g__Chryseobacterium;											Lawsonella
Sphingobium	0	0.000107581	0	0	0	0	0.000247437	0	0	0	3.22744e-05	0.000301228	0	5.37906e-05	0.00196874	3.22744e-05	0	2.15163e-05	6.45488e-05	0	0	0	0	0	1.07581e-05	0.000204404	0	8.6065e-05	0.000182888	0.000150614	9.68231e-05	0.00017213	0.0200101	0.000215163	0	0	0.00066551	k__Bacteria;p__Proteobacteria;c__Alphaproteobacteria;o__Sphingomonadales;f__Sphingomonadaceae;g__Sphingobium;											Johnsonella
Aeromonas	0	0.00939184	0	0	7.53069e-05	0	0.000204404	0	0	0.000161372	0	0.000118339	0	0	0	0	0	0	3.22744e-05	0	0.000129098	0.000150614	0.000139856	0	0	0.000107581	0	0.000118339	0.000129098	8.6065e-05	0.0123073	0.000161372	0.000247437	8.6065e-05	0	0	0.000656843	k__Bacteria;p__Proteobacteria;c__Gammaproteobacteria;o__Aeromonadales;f__Aeromonadaceae;g__Aeromonas;											Enterobacter
Mycobacterium	0	0.000139856	1.07581e-05	1.07581e-05	0	0.000150614	1.07581e-05	0	0	0	3.22744e-05	0	2.15163e-05	0.000150614	0.00110809	1.07581e-05	8.6065e-05	2.15163e-05	0	2.15163e-05	0.0187729	0.000236679	0.000225921	0	4.30325e-05	1.07581e-05	0.00178585	0	0	0	0	7.53069e-05	0	0	0	0.000225921	0.000643097	k__Bacteria;p__Actinobacteria;c__unidentified_Actinobacteria;o__Corynebacteriales;f__Mycobacteriaceae;g__Mycobacterium;											Eikenella
Streptobacillus	0	0	0	0	0	0	9.68231e-05	0	0	0	0	0	8.6065e-05	0	0	0.000139856	0	2.15163e-05	0	0	0	0	5.37906e-05	0	0	0	6.45488e-05	5.37906e-05	6.45488e-05	4.30325e-05	6.45488e-05	0.000107581	0.000118339	0.0219035	0	0	0.000633833	k__Bacteria;p__Fusobacteria;c__Fusobacteriia;o__Fusobacteriales;f__Leptotrichiaceae;g__Streptobacillus;											Vogesella
Brevundimonas	0.0143621	0	3.22744e-05	0.000139856	2.15163e-05	0	0	3.22744e-05	0.00504556	6.45488e-05	0.000150614	9.68231e-05	0.000107581	0	0	2.15163e-05	0	0	0	0.000107581	0	0	0	0	2.15163e-05	3.22744e-05	0.00222693	0	0	0.000150614	0	0	0	1.07581e-05	4.30325e-05	0.000107581	0.000632638	k__Bacteria;p__Proteobacteria;c__Alphaproteobacteria;o__Caulobacterales;f__Caulobacteraceae;g__Brevundimonas;											unidentified_Clostridiales_vadinBB60_group
Fonticella	0	0	0	0	0	9.68231e-05	0.000623971	0.000699278	0.000398051	0.000505632	0.00861726	0.0010543	0.00068852	6.45488e-05	0.000290469	0	0.00374383	0.0010543	0.00158144	0	4.30325e-05	0.000613213	1.07581e-05	0	0.000731553	3.22744e-05	2.15163e-05	0	0	0	0	4.30325e-05	2.15163e-05	0	0.000258195	0.000946715	0.000615006	k__Bacteria;p__Firmicutes;c__Clostridia;o__Clostridiales;f__Clostridiaceae_1;g__Fonticella;											Peptoniphilus
Methyloversatilis	0	2.15163e-05	4.30325e-05	0.000107581	6.45488e-05	6.45488e-05	0.000107581	0.00266802	0.000215163	0.000150614	0.000236679	0.000279711	0.000204404	1.07581e-05	0	6.45488e-05	0.000161372	0.000225921	0.00487343	0	1.07581e-05	0	2.15163e-05	0.000290469	0.000118339	0.000139856	0.00523921	0.000247437	7.53069e-05	0.00559423	7.53069e-05	9.68231e-05	9.68231e-05	0.000107581	0.000150614	0.000204404	0.000610225	k__Bacteria;p__Proteobacteria;c__Betaproteobacteria;o__Rhodocyclales;f__Rhodocyclaceae;g__Methyloversatilis;											Fonticella
Tannerella	0	0	0	5.37906e-05	0	0	0.000150614	0	5.37906e-05	0	0	0	0	0	0	0	0	0	0	0	0	0	0	0	0	0	0	4.30325e-05	8.6065e-05	0.019881	7.53069e-05	0.000204404	0.000118339	0.000107581	0	0	0.000577054	k__Bacteria;p__Bacteroidetes;c__Bacteroidia;o__Bacteroidales;f__Porphyromonadaceae;g__Tannerella;											Williamsia
Tepidiphilus	7.53069e-05	0	1.07581e-05	0	0	7.53069e-05	0.000182888	0	0	0	2.15163e-05	0	0	0.000139856	0.00143083	0	9.68231e-05	0	0	0.0056265	4.30325e-05	1.07581e-05	0	0	0	0	0	0.000139856	0.000742311	0.000118339	7.53069e-05	0.0114682	0.000139856	9.68231e-05	4.30325e-05	0.00017213	0.000575261	k__Bacteria;p__Proteobacteria;c__Betaproteobacteria;o__Hydrogenophilales;f__Hydrogenophilaceae;g__Tepidiphilus;											Dialister
Gordonia	0	0	0.000129098	8.6065e-05	9.68231e-05	0.00017213	8.6065e-05	0	0	0	4.30325e-05	0	0.000118339	0	4.30325e-05	5.37906e-05	0	2.15163e-05	0	2.15163e-05	0	5.37906e-05	9.68231e-05	5.37906e-05	0.00288318	0.000129098	0.0128775	3.22744e-05	0.00313061	2.15163e-05	3.22744e-05	6.45488e-05	3.22744e-05	6.45488e-05	7.53069e-05	0	0.000567192	k__Bacteria;p__Actinobacteria;c__unidentified_Actinobacteria;o__Corynebacteriales;f__Nocardiaceae;g__Gordonia;											Faecalibacterium
Stomatobaculum	0	0.000139856	6.45488e-05	0	0	0	0	3.22744e-05	2.15163e-05	3.22744e-05	4.30325e-05	6.45488e-05	0.000258195	1.07581e-05	1.07581e-05	0.000699278	0	0	0	0	0.000215163	0.000225921	0.0169118	0	0	0	0.000150614	0	7.53069e-05	0	0	0	0	8.6065e-05	0.00034426	6.45488e-05	0.000540297	k__Bacteria;p__Firmicutes;c__Clostridia;o__Clostridiales;f__Lachnospiraceae;g__Stomatobaculum;											Halomonas
Thermobrachium	0	0	0	2.15163e-05	3.22744e-05	5.37906e-05	1.07581e-05	0.0111669	0.000365776	0.000484116	0.00134477	0.000796101	0.000580939	0.000258195	6.45488e-05	2.15163e-05	3.22744e-05	2.15163e-05	0	0	1.07581e-05	0	0	0.000634729	0.000806859	5.37906e-05	4.30325e-05	0.000656246	0	0	1.07581e-05	1.07581e-05	0	0	0.000398051	0.000914441	0.000522068	k__Bacteria;p__Firmicutes;c__Clostridia;o__Clostridiales;f__Clostridiaceae_1;g__Thermobrachium;											Finegoldia
Barrientosiimonas	0	0	8.6065e-05	3.22744e-05	5.37906e-05	0.000118339	0.00519617	0	0	0	8.6065e-05	0	0.000139856	0	4.30325e-05	3.22744e-05	0	1.07581e-05	0	0	0	4.30325e-05	6.45488e-05	5.37906e-05	0.000225921	0.000129098	0.0119415	3.22744e-05	7.53069e-05	2.15163e-05	3.22744e-05	7.53069e-05	3.22744e-05	8.6065e-05	0	0	0.000516988	k__Bacteria;p__Actinobacteria;c__unidentified_Actinobacteria;o__Micrococcales;f__Dermacoccaceae;g__Barrientosiimonas;											Thermoanaerobacterium
Alicyclobacillus	6.45488e-05	0.000139856	3.22744e-05	4.30325e-05	8.6065e-05	7.53069e-05	4.30325e-05	0.000290469	0.000129098	0.000139856	0.000398051	0.00371155	0.000150614	1.07581e-05	0	0.000193646	0.000387293	0	4.30325e-05	0.00587394	0	1.07581e-05	1.07581e-05	0.00416339	0.000107581	0.000387293	7.53069e-05	7.53069e-05	0.000914441	0	1.07581e-05	1.07581e-05	0.000236679	3.22744e-05	0.00017213	0.000290469	0.00050862	k__Bacteria;p__Firmicutes;c__Bacilli;o__Bacillales;f__Alicyclobacillaceae;g__Alicyclobacillus;											Turicella
Brevibacillus	3.22744e-05	3.22744e-05	0	0	0	0	0.00806859	0.000118339	6.45488e-05	0.000107581	0.00318441	0.000301228	0.000107581	0	0.000107581	0	0	0.000225921	0	0.00341033	0	0.000236679	0	0	0.000430325	2.15163e-05	0	0.000139856	7.53069e-05	0.000129098	0.000193646	0.000204404	0.000268953	0.00017213	8.6065e-05	0.000193646	0.000497563	k__Bacteria;p__Firmicutes;c__Bacilli;o__Bacillales;f__Paenibacillaceae;g__Brevibacillus;											Ezakiella
Noviherbaspirillum	0	0	5.37906e-05	0.0041096	6.45488e-05	0.000215163	0.00017213	0.00338881	0.00017213	0.000129098	0.000333502	0.000129098	9.68231e-05	0.000118339	0.000365776	0	2.15163e-05	1.07581e-05	0	0	2.15163e-05	1.07581e-05	0	0.000247437	0.00017213	6.45488e-05	0.000118339	0.000225921	0.000150614	0.000150614	5.37906e-05	0.0067561	9.68231e-05	5.37906e-05	8.6065e-05	0.000279711	0.000496368	k__Bacteria;p__Proteobacteria;c__Betaproteobacteria;o__Burkholderiales;f__Oxalobacteraceae;g__Noviherbaspirillum;											Sandaracinus
Aureimonas	0	0.000462599	1.07581e-05	0	0	0	1.07581e-05	0.000268953	0.000613213	0.000355018	0.000903683	0.0114466	0.000376534	0	0	0	0	0	0.000225921	0	0	0	0	0	0	0.00121567	0	0	0	0	0	0	0.000785343	0	0.000376534	0.00068852	0.000492782	k__Bacteria;p__Proteobacteria;c__Alphaproteobacteria;o__Rhizobiales;f__Aurantimonadaceae;g__Aureimonas;											[Eubacterium]_nodatum_group
Sphingopyxis	0	0	0	0.00017213	0	0	0.000225921	0	0.000236679	0	0	0	0	0	0	0	0	0	0	0	0	0	0	0	0	0	0	0.000107581	9.68231e-05	0.0150076	0.000118339	0.000204404	9.68231e-05	0.000129098	0	0	0.000455427	k__Bacteria;p__Proteobacteria;c__Alphaproteobacteria;o__Sphingomonadales;f__Sphingomonadaceae;g__Sphingopyxis;											Brochothrix
Cohnella	0	0	0	0	0	0.000613213	1.07581e-05	0	0	0	0	0	0	0.0115973	0.000634729	0.000473358	0.00034426	0	0	0	0.000387293	0	0	0	1.07581e-05	1.07581e-05	0	0	0	0	0	0.00051639	0	0	0	0.00129098	0.000441382	k__Bacteria;p__Firmicutes;c__Bacilli;o__Bacillales;f__Paenibacillaceae;g__Cohnella;											unidentified_Lentimicrobiaceae
Aeromicrobium	0	0	0.000150614	7.53069e-05	7.53069e-05	0.000118339	7.53069e-05	0	0	0	1.07581e-05	0	0.000182888	0	0	5.37906e-05	0	0	0	0	0	0	0.000139856	8.6065e-05	0.000182888	8.6065e-05	0.00926275	6.45488e-05	0.0039052	3.22744e-05	5.37906e-05	7.53069e-05	4.30325e-05	0.000150614	0.000107581	0	0.000414785	k__Bacteria;p__Actinobacteria;c__unidentified_Actinobacteria;o__Propionibacteriales;f__Nocardioidaceae;g__Aeromicrobium;											Dolosigranulum
Caldanaerobius	0	0.000376534	0	0	0	0	0	0.00051639	0.000333502	0.000451841	0.00107581	0.00923047	0.000559423	0	0	0	0	0	0.00017213	0	0	0	0	0	0	0.000613213	0	0	1.07581e-05	0	0	0	0.000451841	0	0.000247437	0.000699278	0.000409406	k__Bacteria;p__Firmicutes;c__Clostridia;o__Thermoanaerobacterales;f__Thermoanaerobacteraceae;g__Caldanaerobius;											Rhodococcus
Moraxella	0	4.30325e-05	1.07581e-05	2.15163e-05	3.22744e-05	0.000355018	0	9.68231e-05	0.000107581	7.53069e-05	0.000182888	0.000268953	9.68231e-05	0.000107581	0	0	8.6065e-05	0	2.15163e-05	0	0.000107581	0	0	4.30325e-05	8.6065e-05	0.00541134	5.37906e-05	0	0	0	0	0.000150614	3.22744e-05	0	5.37906e-05	0.00685293	0.000397154	k__Bacteria;p__Proteobacteria;c__Gammaproteobacteria;o__Pseudomonadales;f__Moraxellaceae;g__Moraxella;											Actinomycetospora
Dolosigranulum	0	0.000182888	0	0	0	0.000129098	0	0	0	0	0	0	0	6.45488e-05	0	0	4.30325e-05	0	0	0	0.01121	0.000247437	0.000182888	0	0	0	0	0	0	0	0	0.000118339	0	0	0	0.000236679	0.000344858	k__Bacteria;p__Firmicutes;c__Bacilli;o__Lactobacillales;f__Carnobacteriaceae;g__Dolosigranulum;											Chryseobacterium
unidentified_SR1_(Absconditabacteria)	0	0	0	0	0	0	4.30325e-05	0	0	0	0	0	5.37906e-05	0	0	1.07581e-05	0	0	0	0	0	0	1.07581e-05	0	0	0	3.22744e-05	3.22744e-05	1.07581e-05	0	1.07581e-05	4.30325e-05	3.22744e-05	0.0118877	0	0	0.000337984	k__Bacteria;p__SR1_(Absconditabacteria);c__unidentified_SR1_(Absconditabacteria);o__unidentified_SR1_(Absconditabacteria);f__unidentified_SR1_(Absconditabacteria);g__unidentified_SR1_(Absconditabacteria);											Pseudoxanthomonas
unidentified_Family_XIII	0	0.000139856	0	0	6.45488e-05	0	4.30325e-05	2.15163e-05	2.15163e-05	0.000946715	0.000215163	7.53069e-05	3.22744e-05	0	2.15163e-05	0	0	8.6065e-05	0	0	0.000150614	0.00926275	0.000150614	0	4.30325e-05	0	1.07581e-05	1.07581e-05	0	0	6.45488e-05	0	0	0	0	3.22744e-05	0.000316468	k__Bacteria;p__Firmicutes;c__Clostridia;o__Clostridiales;f__Family_XIII;g__unidentified_Family_XIII;											Flavobacterium
Aerococcus	0	0	0	0	0.000150614	0	0.000182888	0	0	0.000215163	0	0	0	0	0	0	0	0	0	0	0	0	0	0	0	0	0	0.000129098	0.000118339	0.000129098	0.00980065	0.000161372	0.000182888	0.00017213	0	0	0.000312284	k__Bacteria;p__Firmicutes;c__Bacilli;o__Lactobacillales;f__Aerococcaceae;g__Aerococcus;											Lactococcus
Tumebacillus	0	0	3.22744e-05	0	1.07581e-05	0	0.000247437	0.000204404	0.000150614	0.000193646	0.0040343	0.000311986	0.0028509	0	5.37906e-05	2.15163e-05	2.15163e-05	0.000118339	0	0	0	0.000182888	9.68231e-05	0	0.000193646	0	7.53069e-05	2.15163e-05	0.00166751	1.07581e-05	1.07581e-05	4.30325e-05	4.30325e-05	0.000150614	0.00017213	0.000247437	0.000310193	k__Bacteria;p__Firmicutes;c__Bacilli;o__Bacillales;f__Alicyclobacillaceae;g__Tumebacillus;											Bergeyella
Geobacter	2.15163e-05	0.000118339	0	0.000839134	3.22744e-05	2.15163e-05	5.37906e-05	0	4.30325e-05	0	0.000161372	0	0	0	4.30325e-05	0	0	9.68231e-05	0	0.00363625	0.000161372	0.00552968	0.000129098	1.07581e-05	0.000129098	2.15163e-05	5.37906e-05	0	0	2.15163e-05	0	0	0	0	0	0	0.000308997	k__Bacteria;p__Proteobacteria;c__Deltaproteobacteria;o__Desulfuromonadales;f__Geobacteraceae;g__Geobacter;											Pseudoramibacter
Ralstonia	0	5.37906e-05	5.37906e-05	0	0	0	0.000161372	0	0	0	0.000118339	0	0	0	4.30325e-05	0	0	7.53069e-05	0	0	0.000129098	0.00599228	6.45488e-05	0	6.45488e-05	0	0	1.07581e-05	0.003647	4.30325e-05	3.22744e-05	8.6065e-05	3.22744e-05	3.22744e-05	3.22744e-05	0	0.000296446	k__Bacteria;p__Proteobacteria;c__Betaproteobacteria;o__Burkholderiales;f__Burkholderiaceae;g__Ralstonia;											Abiotrophia
Treponema	0	0	0	0.000806859	1.07581e-05	1.07581e-05	6.45488e-05	6.45488e-05	0	0	0	0	0	0	0	0	0	0	0	0	0	0	0	3.22744e-05	2.15163e-05	1.07581e-05	1.07581e-05	0.00934881	2.15163e-05	4.30325e-05	4.30325e-05	2.15163e-05	3.22744e-05	3.22744e-05	0	0	0.000293757	k__Bacteria;p__Spirochaetes;c__unidentified_Spirochaetes;o__Spirochaetales;f__Spirochaetaceae;g__Treponema;											Sphingopyxis
Bifidobacterium	0	0	1.07581e-05	2.15163e-05	4.30325e-05	0.00174282	0.000118339	0	0	8.6065e-05	0	0	0	1.07581e-05	0	0	0	0	0	0	3.22744e-05	0	0	0	1.07581e-05	1.07581e-05	1.07581e-05	5.37906e-05	4.30325e-05	2.15163e-05	0.00800405	8.6065e-05	3.22744e-05	6.45488e-05	0	4.30325e-05	0.000290171	k__Bacteria;p__Actinobacteria;c__unidentified_Actinobacteria;o__Bifidobacteriales;f__Bifidobacteriaceae;g__Bifidobacterium;											Lachnoclostridium
Denitratisoma	0	3.22744e-05	7.53069e-05	6.45488e-05	6.45488e-05	0.000161372	0	0	0	0	0	0.000139856	0	0	0	0	0	0	4.30325e-05	0	0	0	0	8.6065e-05	0.000150614	0.00926275	9.68231e-05	0	0	0	0	0	6.45488e-05	0	0	0	0.000284493	k__Bacteria;p__Proteobacteria;c__Betaproteobacteria;o__Rhodocyclales;f__Rhodocyclaceae;g__Denitratisoma;											Lachnoanaerobaculum
Dialister	0	3.22744e-05	2.15163e-05	2.15163e-05	4.30325e-05	7.53069e-05	4.30325e-05	6.45488e-05	0	0	0	7.53069e-05	0	0	0	0	0	0	0	0	0	0	0	9.68231e-05	9.68231e-05	0.00623971	6.45488e-05	0.00276484	0	2.15163e-05	6.45488e-05	4.30325e-05	7.53069e-05	3.22744e-05	0	0	0.000274332	k__Bacteria;p__Firmicutes;c__Negativicutes;o__Selenomonadales;f__Veillonellaceae;g__Dialister;											Lautropia
Blastococcus	0	0	5.37906e-05	6.45488e-05	0.00854195	0.000161372	0	0	0	0.000107581	0	0	0	0	0	0	0	0	0	0	0	0	0	0.000118339	0.000236679	0.000139856	9.68231e-05	0	0	0	4.30325e-05	0	0	0	0	0	0.000265666	k__Bacteria;p__Actinobacteria;c__unidentified_Actinobacteria;o__Frankiales;f__Geodermatophilaceae;g__Blastococcus;											Dysgonomonas
Porphyrobacter	0	0	9.68231e-05	6.45488e-05	0.00845589	9.68231e-05	0	0	0	0.000150614	0	0	0	0	0	0	0	0	0	0	0	0	0	7.53069e-05	0.000139856	0.000129098	9.68231e-05	0	0	0	0.000139856	0	0	0	0	0	0.000262379	k__Bacteria;p__Proteobacteria;c__Alphaproteobacteria;o__Sphingomonadales;f__Erythrobacteraceae;g__Porphyrobacter;											Peptostreptococcus
Variovorax	6.45488e-05	0	0	0	0	0	0	0	0	0	0	0	0	0	0	0	0	0	0	0.00930578	0	0	0	0	0	0	0	0	0	0	0	0	0	0	0	0	0.000260287	k__Bacteria;p__Proteobacteria;c__Betaproteobacteria;o__Burkholderiales;f__Comamonadaceae;g__Variovorax;											Stomatobaculum
Herminiimonas	0	0	0	0	0.000301228	0	0	0.00017213	0.000139856	0.00672383	0.000419567	0.000225921	0.000129098	0	0	0	0	0	0	0	0	0	0	0	1.07581e-05	0	0	0	0	0	0.000247437	0	0	0	8.6065e-05	0.000322744	0.000243851	k__Bacteria;p__Proteobacteria;c__Betaproteobacteria;o__Burkholderiales;f__Oxalobacteraceae;g__Herminiimonas;											Modestobacter
Methylomonas	0	0	0	7.53069e-05	0	0	0.000118339	0	7.53069e-05	0	0	0	0	0	0	0	0	0	0	0	0	0	0	0	0	0	0	7.53069e-05	8.6065e-05	0.00775661	7.53069e-05	9.68231e-05	7.53069e-05	6.45488e-05	0	0	0.000236081	k__Bacteria;p__Proteobacteria;c__Gammaproteobacteria;o__Methylococcales;f__Methylococcaceae;g__Methylomonas;											Caldicellulosiruptor
Clostridium_sensu_stricto_6	0	0	0	0	0.000118339	0.000215163	0	0.000129098	6.45488e-05	0.00150614	0.000182888	0.000150614	6.45488e-05	0.00409885	0.000301228	0.000150614	0.000150614	0	0	0	0.000182888	0	0	0	1.07581e-05	0	0	0	0	0	8.6065e-05	0.00017213	0	0	6.45488e-05	0.000591697	0.000228909	k__Bacteria;p__Firmicutes;c__Clostridia;o__Clostridiales;f__Clostridiaceae_1;g__Clostridium_sensu_stricto_6;											Tannerella
Clostridium_sensu_stricto_12	0.00489495	0	2.15163e-05	1.07581e-05	7.53069e-05	1.07581e-05	0	7.53069e-05	5.37906e-05	0.0011296	0.000139856	9.68231e-05	9.68231e-05	0	0	0	0	0	0	2.15163e-05	0	0	1.07581e-05	1.07581e-05	3.22744e-05	3.22744e-05	0.00109733	0	0	0	7.53069e-05	0	0	3.22744e-05	8.6065e-05	9.68231e-05	0.000225024	k__Bacteria;p__Firmicutes;c__Clostridia;o__Clostridiales;f__Clostridiaceae_1;g__Clostridium_sensu_stricto_12;											Desulfotomaculum
Hyphomicrobium	0	0	7.53069e-05	6.45488e-05	0.00694975	6.45488e-05	0	0	0	0.000118339	0	0	0	0	0	0	0	0	0	0	0	0	0	6.45488e-05	0.000139856	0.000129098	0.000139856	0	0	0	0.000107581	0	0	0	0	0	0.000218151	k__Bacteria;p__Proteobacteria;c__Alphaproteobacteria;o__Rhizobiales;f__Hyphomicrobiaceae;g__Hyphomicrobium;											Aeribacillus
Xanthomonas	0.00137704	0	0	0	0	0.00017213	0	7.53069e-05	0.000107581	4.30325e-05	0.000118339	0.000118339	0.000118339	0.00017213	0	0	0.000139856	0	0	1.07581e-05	7.53069e-05	0	0	0	0	0	0	0	0	0	0	0.000107581	0	0	4.30325e-05	0.00479812	0.000207692	k__Bacteria;p__Proteobacteria;c__Gammaproteobacteria;o__Xanthomonadales;f__Xanthomonadaceae;g__Xanthomonas;											Ethanoligenens
Bdellovibrio	0	2.15163e-05	0	4.30325e-05	2.15163e-05	2.15163e-05	0	0	0	0	0	3.22744e-05	0	0	0	0	0	0	1.07581e-05	0	0	0	0	2.15163e-05	3.22744e-05	0.00705733	5.37906e-05	0	0	0	0	0	1.07581e-05	0	0	0	0.000203508	k__Bacteria;p__Proteobacteria;c__Deltaproteobacteria;o__Bdellovibrionales;f__Bdellovibrionaceae;g__Bdellovibrio;											Kingella
Raoultella	0	2.15163e-05	0.000129098	7.53069e-05	6.45488e-05	0.000150614	1.07581e-05	0.000129098	2.15163e-05	1.07581e-05	1.07581e-05	1.07581e-05	0	0	0	0	2.15163e-05	2.15163e-05	0.000129098	1.07581e-05	2.15163e-05	0	0	0.0056265	0.000462599	0.000150614	8.6065e-05	5.37906e-05	0	0	4.30325e-05	0	0	0	0	4.30325e-05	0.00020291	k__Bacteria;p__Proteobacteria;c__Gammaproteobacteria;o__Enterobacteriales;f__Enterobacteriaceae;g__Raoultella;											Parvimonas
Veillonella	0	1.07581e-05	0.000667004	2.15163e-05	0.00307682	5.37906e-05	1.07581e-05	4.30325e-05	3.22744e-05	0.00191495	0.000161372	0.000247437	4.30325e-05	3.22744e-05	0	0	0	0	0	0	2.15163e-05	0	0	0	6.45488e-05	6.45488e-05	3.22744e-05	0	0	0	0.000559423	0	1.07581e-05	0	2.15163e-05	9.68231e-05	0.000199623	k__Bacteria;p__Firmicutes;c__Negativicutes;o__Selenomonadales;f__Veillonellaceae;g__Veillonella;											Tepidiphilus
Candidatus_Alysiosphaera	0	0	0	0	0	0	7.53069e-05	0	0	0	0.000129098	0	0	0	3.22744e-05	0	0.000118339	0.00663776	4.30325e-05	0	0	3.22744e-05	0	0	9.68231e-05	0	0	0	0	0	0	0	0	0	0	0	0.000199025	k__Bacteria;p__Proteobacteria;c__Alphaproteobacteria;o__Rhodospirillales;f__unidentified_Rhodospirillales;g__Candidatus_Alysiosphaera;											Butyrivibrio_2
Rubellimicrobium	0	0.00017213	0	0	0	0	1.07581e-05	0.000182888	0.000150614	0.000204404	0.000527148	0.00437856	0.000182888	0	0	0	0	0	9.68231e-05	0	0	0	0	0	0	0.000387293	0	0	0	0	0	0	0.000268953	0	0.00017213	0.000290469	0.00019514	k__Bacteria;p__Proteobacteria;c__Alphaproteobacteria;o__Rhodobacterales;f__Rhodobacteraceae;g__Rubellimicrobium;											Xanthomonas
Bartonella	0	0	0	0	0	3.22744e-05	9.68231e-05	0	0	0	0	2.15163e-05	0	2.15163e-05	0	0	1.07581e-05	0	0	0	3.22744e-05	0	0	0	0	0	0	5.37906e-05	6.45488e-05	6.45488e-05	3.22744e-05	0.00626123	4.30325e-05	4.30325e-05	0	9.68231e-05	0.000190957	k__Bacteria;p__Proteobacteria;c__Alphaproteobacteria;o__Rhizobiales;f__Bartonellaceae;g__Bartonella;											Xanthobacter
Shewanella	0	0	5.37906e-05	5.37906e-05	0.00591697	9.68231e-05	0	0	0	6.45488e-05	0	0	0	0	0	0	0	0	0	0	0	0	0	6.45488e-05	0.000129098	0.000129098	0.000107581	0	0	0	2.15163e-05	0	0	0	0	0	0.000184382	k__Bacteria;p__Proteobacteria;c__Gammaproteobacteria;o__Alteromonadales;f__Shewanellaceae;g__Shewanella;											Rikenellaceae_RC9_gut_group
Rheinheimera	0	0	0	0	0	0.000182888	0	0.000129098	6.45488e-05	6.45488e-05	0.00017213	9.68231e-05	0.000129098	8.6065e-05	0	0	7.53069e-05	0	0	0	0.000118339	0	0	0	0	0	0	0	0	0	0	0.000118339	0	0	5.37906e-05	0.00532527	0.000183785	k__Bacteria;p__Proteobacteria;c__Gammaproteobacteria;o__Chromatiales;f__Chromatiaceae;g__Rheinheimera;											Defluviitaleaceae_UCG-011
[Ruminococcus]_gauvreauii_group	0	0	0	0	0	8.6065e-05	0	0	0	0	0	0	0	4.30325e-05	0	0	0.00591697	0.000139856	6.45488e-05	0	0.000107581	0	0	0	0	0	0	0	0	0	0	4.30325e-05	0	0	0	9.68231e-05	0.000180497	k__Bacteria;p__Firmicutes;c__Clostridia;o__Clostridiales;f__Lachnospiraceae;g__[Ruminococcus]_gauvreauii_group;											Phocaeicola
Caldicellulosiruptor	0	0	0	0	0	0	0	0.000118339	7.53069e-05	0.000139856	0.000204404	0.000193646	0.00353942	0	0	4.30325e-05	0	0	0	0	0	0	7.53069e-05	0	2.15163e-05	1.07581e-05	8.6065e-05	0	1.07581e-05	0	1.07581e-05	2.15163e-05	1.07581e-05	0.00157069	0.000139856	0.000225921	0.000180497	k__Bacteria;p__Firmicutes;c__Clostridia;o__Thermoanaerobacterales;f__Family_III;g__Caldicellulosiruptor;											Taxonomy
Pannonibacter	0	5.37906e-05	4.30325e-05	2.15163e-05	4.30325e-05	8.6065e-05	0	0	0	0	0	0.000150614	0	0	0	0	0	0	4.30325e-05	0	0	0	0	3.22744e-05	0.000118339	0.00574484	5.37906e-05	0	0	0	0	0	7.53069e-05	0	0	0	0.000179601	k__Bacteria;p__Proteobacteria;c__Alphaproteobacteria;o__Rhodobacterales;f__Rhodobacteraceae;g__Pannonibacter;
Pyrinomonas	0	5.37906e-05	0	0	0	0	3.22744e-05	0	0	0	8.6065e-05	0	0	0	4.30325e-05	0	0	9.68231e-05	0	0	4.30325e-05	0.00599228	5.37906e-05	0	5.37906e-05	0	0	0	0	0	0	0	0	0	0	0	0.000179302	k__Bacteria;p__Acidobacteria;c__Blastocatellia;o__unidentified_Blastocatellia;f__Blastocatellaceae_(Subgroup_4);g__Pyrinomonas;
Psychrobacter	0	0	6.45488e-05	3.22744e-05	5.37906e-05	5.37906e-05	0	0	0	0	0	0	1.07581e-05	0	0	1.07581e-05	0	0	0	1.07581e-05	0	0	2.15163e-05	3.22744e-05	6.45488e-05	5.37906e-05	0.00592773	0	0	0	0	0	0	4.30325e-05	0	0	0.00017721	k__Bacteria;p__Proteobacteria;c__Gammaproteobacteria;o__Pseudomonadales;f__Moraxellaceae;g__Psychrobacter;
Bacteroides	0	0	0	0	0	0	2.15163e-05	0	0	0	0	0	0	0	0	2.15163e-05	0	0	0	0	0	0	0	0	0	0	3.22744e-05	2.15163e-05	4.30325e-05	0	2.15163e-05	2.15163e-05	1.07581e-05	0.00603531	0	0	0.000173027	k__Bacteria;p__Bacteroidetes;c__Bacteroidia;o__Bacteroidales;f__Bacteroidaceae;g__Bacteroides;
Fusicatenibacter	0	0	0	1.07581e-05	0.000215163	0	0	0.000150614	8.6065e-05	0.0043678	0.000279711	0.000279711	0.000182888	0	0	0	0	0	0	0	0	0	0	0	0	0	0	0	0	0	0.000193646	0	0	0	0.000161372	0.000258195	0.000171831	k__Bacteria;p__Firmicutes;c__Clostridia;o__Clostridiales;f__Lachnospiraceae;g__Fusicatenibacter;
Lysobacter	0	0	4.30325e-05	4.30325e-05	0.00509935	0.000107581	0	0	0	4.30325e-05	0	0	0	0	0	0	0	0	1.07581e-05	0	0	0	0	3.22744e-05	9.68231e-05	0.000118339	4.30325e-05	0	0	0	3.22744e-05	0	0	0	0	0	0.000157487	k__Bacteria;p__Proteobacteria;c__Gammaproteobacteria;o__Xanthomonadales;f__Xanthomonadaceae;g__Lysobacter;
Craurococcus	0	0	0	0	0	0	0.00484116	0	0	0	0.000129098	0	0	0	4.30325e-05	0	0	5.37906e-05	0	0	0	8.6065e-05	0	0	8.6065e-05	0	0	5.37906e-05	6.45488e-05	7.53069e-05	4.30325e-05	6.45488e-05	8.6065e-05	4.30325e-05	0	0	0.000157487	k__Bacteria;p__Proteobacteria;c__Alphaproteobacteria;o__Rhodospirillales;f__Acetobacteraceae;g__Craurococcus;
Ethanoligenens	0	0	0	0	0	0.000161372	0	0	0	0	0	0	0	0.00441083	0.000258195	0.000139856	9.68231e-05	0	0	0	8.6065e-05	0	0	0	0	0	0	0	0	0	0	0.000161372	0	0	0	0.000258195	0.000154797	k__Bacteria;p__Firmicutes;c__Clostridia;o__Clostridiales;f__Ruminococcaceae;g__Ethanoligenens;
Sphingosinicella	0	0	0	0	0	0	0.00465827	0	0	0	8.6065e-05	0	0	0	5.37906e-05	0	0	7.53069e-05	0	0	0	3.22744e-05	0	0	0.00017213	0	0	2.15163e-05	7.53069e-05	6.45488e-05	4.30325e-05	7.53069e-05	6.45488e-05	7.53069e-05	0	0	0.000152706	k__Bacteria;p__Proteobacteria;c__Alphaproteobacteria;o__Sphingomonadales;f__Sphingomonadaceae;g__Sphingosinicella;
Thermomonas	0	0	0	0	0.000828376	7.53069e-05	0	0	0	4.30325e-05	0	0	0	4.30325e-05	0	0	0.00385141	0.000118339	7.53069e-05	0	3.22744e-05	0	0	0	0	1.07581e-05	1.07581e-05	0	0	0	2.15163e-05	5.37906e-05	0	0	0	0.000107581	0.00014643	k__Bacteria;p__Proteobacteria;c__Gammaproteobacteria;o__Xanthomonadales;f__Xanthomonadaceae;g__Thermomonas;
[Eubacterium]_ventriosum_group	0	0.00441083	0	0	0	0	0	0	0	0	0	8.6065e-05	0	0	0	0	0	0	2.15163e-05	0	5.37906e-05	0.000107581	8.6065e-05	0	0	6.45488e-05	0	0	0	0	0	0	3.22744e-05	0	0	0	0.000135074	k__Bacteria;p__Firmicutes;c__Clostridia;o__Clostridiales;f__Lachnospiraceae;g__[Eubacterium]_ventriosum_group;
Filifactor	0	3.22744e-05	0	0	0	0	4.30325e-05	0	0	0	0	7.53069e-05	0	0	0	0	0	0	4.30325e-05	0	0	0	0	0	0	5.37906e-05	0	2.15163e-05	6.45488e-05	6.45488e-05	3.22744e-05	8.6065e-05	0.00418491	6.45488e-05	0	0	0.000132385	k__Bacteria;p__Firmicutes;c__Clostridia;o__Clostridiales;f__Peptostreptococcaceae;g__Filifactor;
Pelomonas	0	0	0	4.30325e-05	0	0	2.15163e-05	3.22744e-05	0.00362549	4.30325e-05	3.22744e-05	5.37906e-05	4.30325e-05	0	0	0	0	0	0	0	0	0	0	0	0	0	0	1.07581e-05	0.000570181	5.37906e-05	1.07581e-05	2.15163e-05	0	1.07581e-05	5.37906e-05	5.37906e-05	0.000129994	k__Bacteria;p__Proteobacteria;c__Betaproteobacteria;o__Burkholderiales;f__Comamonadaceae;g__Pelomonas;
Hydrogenophilus	0	0	1.07581e-05	3.22744e-05	5.37906e-05	6.45488e-05	0	0	0	0	0	0	4.30325e-05	0	0	2.15163e-05	0	0	0	0	0	0	5.37906e-05	3.22744e-05	8.6065e-05	7.53069e-05	0.00405581	0	0	0	0	0	0	4.30325e-05	0	0	0.000127006	k__Bacteria;p__Proteobacteria;c__Betaproteobacteria;o__Hydrogenophilales;f__Hydrogenophilaceae;g__Hydrogenophilus;
Romboutsia	0	0	0	0	0	6.45488e-05	0	0	0	0	0	0	0	7.53069e-05	0	0	0.00378686	9.68231e-05	8.6065e-05	0	0.000107581	0	0	0	0	0	0	0	0	0	0	8.6065e-05	0	0	0	0.000139856	0.00012342	k__Bacteria;p__Firmicutes;c__Clostridia;o__Clostridiales;f__Peptostreptococcaceae;g__Romboutsia;
Abiotrophia	0	0	0	0	0	0	4.30325e-05	0	0	0	0.000139856	0	0	0	5.37906e-05	9.68231e-05	7.53069e-05	0.00356094	3.22744e-05	0	0	7.53069e-05	0	0	7.53069e-05	0	0	0	0	0	0	0	0	0	0	0	0.000115351	k__Bacteria;p__Firmicutes;c__Bacilli;o__Lactobacillales;f__Aerococcaceae;g__Abiotrophia;
Brochothrix	0	0	0	0	0	6.45488e-05	0	0	0	0	0	0	0	3.22744e-05	0	0	0.00363625	8.6065e-05	6.45488e-05	0	4.30325e-05	0	0	0	0	0	0	0	0	0	0	4.30325e-05	0	0	0	0.000118339	0.000113558	k__Bacteria;p__Firmicutes;c__Bacilli;o__Bacillales;f__Listeriaceae;g__Brochothrix;
Thermoanaerobacter	0	0	0	5.37906e-05	0	0	0.000129098	0	9.68231e-05	0	0	0	0	0	0	0	0	0	0	0	0	0	0	0	0	0	0	4.30325e-05	6.45488e-05	0.00308758	6.45488e-05	9.68231e-05	9.68231e-05	7.53069e-05	0	0	0.000105788	k__Bacteria;p__Firmicutes;c__Clostridia;o__Thermoanaerobacterales;f__Thermoanaerobacteraceae;g__Thermoanaerobacter;
Roseomonas	0	0	4.30325e-05	3.22744e-05	1.07581e-05	7.53069e-05	4.30325e-05	0	0	0	8.6065e-05	0	0	0	3.22744e-05	0	0	7.53069e-05	0	0	0	6.45488e-05	0	3.22744e-05	0.00298	7.53069e-05	7.53069e-05	0	0	0	0	0	0	0	0	0	0.000100708	k__Bacteria;p__Proteobacteria;c__Alphaproteobacteria;o__Rhodospirillales;f__Acetobacteraceae;g__Roseomonas;
Turneriella	0	0	1.07581e-05	0.00334578	0	1.07581e-05	0	0	2.15163e-05	0	0	0	0	0	0	0	0	0	0	0	0	0	0	0	4.30325e-05	3.22744e-05	4.30325e-05	0	0	4.30325e-05	0	0	0	0	0	0	9.86161e-05	k__Bacteria;p__Spirochaetes;c__unidentified_Spirochaetes;o__Spirochaetales;f__Leptospiraceae;g__Turneriella;
Skermanella	0	0	2.15163e-05	2.15163e-05	3.22744e-05	0.00305531	0	0	0	0	0	0	0	3.22744e-05	0	0	3.22744e-05	0	0	0	1.07581e-05	0	0	2.15163e-05	6.45488e-05	5.37906e-05	4.30325e-05	0	0	0	0	5.37906e-05	0	0	0	7.53069e-05	9.77196e-05	k__Bacteria;p__Proteobacteria;c__Alphaproteobacteria;o__Rhodospirillales;f__Rhodospirillaceae;g__Skermanella;
Clostridium_sensu_stricto_10	0	0	3.22744e-05	0	0	9.68231e-05	0	3.22744e-05	1.07581e-05	1.07581e-05	2.15163e-05	4.30325e-05	1.07581e-05	2.15163e-05	0	0	0.00240982	0.00017213	6.45488e-05	0	4.30325e-05	0	0	0	0	0	0	0	1.07581e-05	0	0	6.45488e-05	0	0	0.000107581	0.000129098	9.11452e-05	k__Bacteria;p__Firmicutes;c__Clostridia;o__Clostridiales;f__Clostridiaceae_1;g__Clostridium_sensu_stricto_10;
Arthrobacter	0	0.00247437	3.22744e-05	0	0	0	0	0	0	2.15163e-05	1.07581e-05	8.6065e-05	0	0	0	0	0	0	1.07581e-05	0	5.37906e-05	6.45488e-05	4.30325e-05	0	0	4.30325e-05	0	0	1.07581e-05	0	0	0	3.22744e-05	0	0.000204404	1.07581e-05	8.6065e-05	k__Bacteria;p__Actinobacteria;c__unidentified_Actinobacteria;o__Micrococcales;f__Micrococcaceae;g__Arthrobacter;
Peptococcus	0	0	1.07581e-05	3.22744e-05	1.07581e-05	0.00215163	0	0	0	0	0	0	0	3.22744e-05	0	0	2.15163e-05	0	0	0	3.22744e-05	0	0	0	3.22744e-05	6.45488e-05	3.22744e-05	0	0	0	0	3.22744e-05	0	0	0	6.45488e-05	6.99278e-05	k__Bacteria;p__Firmicutes;c__Clostridia;o__Clostridiales;f__Peptococcaceae;g__Peptococcus;
Parvimonas	0	0	0.00195798	4.30325e-05	3.22744e-05	3.22744e-05	0	0	0	0	0	0	0	0	0	0	0	0	0	0	0	0	0	3.22744e-05	5.37906e-05	4.30325e-05	5.37906e-05	0	4.30325e-05	0	0	0	0	0	2.15163e-05	0	6.42499e-05	k__Bacteria;p__Firmicutes;c__Clostridia;o__Clostridiales;f__Family_XI;g__Parvimonas;
Bosea	0	0	4.30325e-05	0	0	0	2.15163e-05	0	0	0	0	0	0	0	0	0	0	0	0	0	0	0	0	0	0	0	0	2.15163e-05	0.00200101	1.07581e-05	3.22744e-05	2.15163e-05	3.22744e-05	2.15163e-05	6.45488e-05	0	6.30546e-05	k__Bacteria;p__Proteobacteria;c__Alphaproteobacteria;o__Rhizobiales;f__Bradyrhizobiaceae;g__Bosea;
Nibribacter	0	0	1.07581e-05	1.07581e-05	0	2.15163e-05	0	0	0	0	0	0	0	0	0	2.15163e-05	0	0	0	0	0	0	3.22744e-05	0	2.15163e-05	1.07581e-05	0.00202253	0	0	0	0	0	0	1.07581e-05	0	0	6.00662e-05	k__Bacteria;p__Bacteroidetes;c__Cytophagia;o__Cytophagales;f__Cytophagaceae;g__Nibribacter;
Tyzzerella_3	0	0	0	0	0	0	2.15163e-05	0	0	0	5.37906e-05	0	0	8.6065e-05	0.00187191	2.15163e-05	0	0	0	0	0	2.15163e-05	0	0	5.37906e-05	0	0	0	0	0	0	0	0	0	0	0	5.91697e-05	k__Bacteria;p__Firmicutes;c__Clostridia;o__Clostridiales;f__Lachnospiraceae;g__Tyzzerella_3;
Carnobacterium	0	0	0	4.30325e-05	0	0	0	6.45488e-05	0.00144159	8.6065e-05	0.000129098	5.37906e-05	4.30325e-05	0	0	0	0	0	0	2.15163e-05	0	0	0	0	0	0	0	0	0	8.6065e-05	0	0	0	0	2.15163e-05	6.45488e-05	5.70778e-05	k__Bacteria;p__Firmicutes;c__Bacilli;o__Lactobacillales;f__Carnobacteriaceae;g__Carnobacterium;
Burkholderia-Paraburkholderia	0	0	0	0	0	0	0.00174282	0	0	0	5.37906e-05	0	0	0	1.07581e-05	0	0	4.30325e-05	0	0	0	1.07581e-05	0	0	3.22744e-05	0	0	2.15163e-05	2.15163e-05	1.07581e-05	1.07581e-05	2.15163e-05	2.15163e-05	3.22744e-05	0	0	5.64802e-05	k__Bacteria;p__Proteobacteria;c__Betaproteobacteria;o__Burkholderiales;f__Burkholderiaceae;g__Burkholderia-Paraburkholderia;
Effusibacillus	0	0	3.22744e-05	1.07581e-05	2.15163e-05	0.00155993	0	0	0	0	0	0	0	4.30325e-05	0	0	1.07581e-05	0	0	0	2.15163e-05	0	0	1.07581e-05	3.22744e-05	2.15163e-05	5.37906e-05	0	0	0	0	1.07581e-05	0	0	0	5.37906e-05	5.22964e-05	k__Bacteria;p__Firmicutes;c__Bacilli;o__Bacillales;f__Alicyclobacillaceae;g__Effusibacillus;
Lautropia	0	0	0	0	0	3.22744e-05	0	0	0	0	0	0	0	0.00135552	4.30325e-05	2.15163e-05	2.15163e-05	0	0	0	2.15163e-05	0	0	0	0	0	0	0	0	0	0	2.15163e-05	0	0	0	6.45488e-05	4.3929e-05	k__Bacteria;p__Proteobacteria;c__Betaproteobacteria;o__Burkholderiales;f__Burkholderiaceae;g__Lautropia;
Comamonas	0	0	2.15163e-05	0	0	0	2.15163e-05	0	0	0	0	0	0	0	0	0	0	0	0	0	0	0	0	0	0	0	0	1.07581e-05	0.00137704	1.07581e-05	2.15163e-05	1.07581e-05	1.07581e-05	0	4.30325e-05	0	4.24348e-05	k__Bacteria;p__Proteobacteria;c__Betaproteobacteria;o__Burkholderiales;f__Comamonadaceae;g__Comamonas;
Ramlibacter	0	0	1.07581e-05	0	0	0	3.22744e-05	0	0	0	0	0	0	0	0	0	0	0	0	0	0	0	0	0	0	0	0	1.07581e-05	0.00120491	3.22744e-05	2.15163e-05	2.15163e-05	1.07581e-05	1.07581e-05	4.30325e-05	0	3.88488e-05	k__Bacteria;p__Proteobacteria;c__Betaproteobacteria;o__Burkholderiales;f__Comamonadaceae;g__Ramlibacter;
Acidiphilium	0	0	0	3.22744e-05	0	0	0	1.07581e-05	0.00110809	2.15163e-05	3.22744e-05	4.30325e-05	2.15163e-05	0	0	0	0	0	0	0	0	0	0	0	0	0	0	0	0	3.22744e-05	0	0	0	0	4.30325e-05	1.07581e-05	3.76534e-05	k__Bacteria;p__Proteobacteria;c__Alphaproteobacteria;o__Rhodospirillales;f__Acetobacteraceae;g__Acidiphilium;
Magnetospirillum	0	0	0	1.07581e-05	0	1.07581e-05	4.30325e-05	0	0	0	4.30325e-05	0	0	0	1.07581e-05	0	0	2.15163e-05	0	0	0	2.15163e-05	0	1.07581e-05	0.00107581	0	3.22744e-05	0	0	0	0	0	0	0	0	0	3.55616e-05	k__Bacteria;p__Proteobacteria;c__Alphaproteobacteria;o__Rhodospirillales;f__Rhodospirillaceae;g__Magnetospirillum;
Pigmentiphaga	0	0	0	0	0	0	0	0	0	0	2.15163e-05	0	0	1.07581e-05	0.00107581	0	0	0	0	0	0	2.15163e-05	0	0	0	0	0	0	0	0	0	0	0	0	0	0	3.13779e-05	k__Bacteria;p__Proteobacteria;c__Betaproteobacteria;o__Burkholderiales;f__Alcaligenaceae;g__Pigmentiphaga;
[Eubacterium]_brachy_group	0	0	0.000935957	0	1.07581e-05	0	0	0	0	0	0	0	0	0	0	0	0	0	0	0	0	0	0	0	1.07581e-05	1.07581e-05	3.22744e-05	0	2.15163e-05	0	0	0	0	0	0	0	2.83895e-05	k__Bacteria;p__Firmicutes;c__Clostridia;o__Clostridiales;f__Family_XIII;g__[Eubacterium]_brachy_group;
Peptostreptococcus	0	0	0.000817618	0	2.15163e-05	3.22744e-05	0	0	0	0	0	0	0	0	0	0	0	0	0	0	0	0	0	1.07581e-05	4.30325e-05	2.15163e-05	2.15163e-05	0	1.07581e-05	0	0	0	0	0	2.15163e-05	0	2.77918e-05	k__Bacteria;p__Firmicutes;c__Clostridia;o__Clostridiales;f__Peptostreptococcaceae;g__Peptostreptococcus;
Proteiniphilum	0	0	0	0	0	0	1.07581e-05	0	0	0	0	0	0	0	0	0	0	0.000892924	0	0	0	0	0	0	1.07581e-05	0	0	0	0	0	0	0	0	0	0	0	2.54011e-05	k__Bacteria;p__Bacteroidetes;c__Bacteroidia;o__Bacteroidales;f__Porphyromonadaceae;g__Proteiniphilum;
Microbacterium	0.000118339	0	0.000129098	0	1.07581e-05	0.000333502	0	1.07581e-05	0	0	0	0	0	0	0	1.07581e-05	0	0	0	0	0	0	1.07581e-05	0	1.07581e-05	1.07581e-05	9.68231e-05	0	5.37906e-05	0	1.07581e-05	0	1.07581e-05	0	5.37906e-05	1.07581e-05	2.45046e-05	k__Bacteria;p__Actinobacteria;c__unidentified_Actinobacteria;o__Micrococcales;f__Microbacteriaceae;g__Microbacterium;
[Eubacterium]_yurii_group	0	0	0.000720794	0	2.15163e-05	0	0	0	0	0	0	0	0	0	0	0	0	0	0	0	0	0	0	1.07581e-05	1.07581e-05	1.07581e-05	1.07581e-05	0	0	0	0	0	0	0	0	0	2.18151e-05	k__Bacteria;p__Firmicutes;c__Clostridia;o__Clostridiales;f__Peptostreptococcaceae;g__[Eubacterium]_yurii_group;
Cereibacter	0	0	5.37906e-05	0	0	0	2.15163e-05	0	0	0	0	0	0	0	0	0	0	0	0	0	0	0	0	2.15163e-05	0	0	0	0	0.000602455	1.07581e-05	0	1.07581e-05	2.15163e-05	0	2.15163e-05	0	2.12174e-05	k__Bacteria;p__Proteobacteria;c__Alphaproteobacteria;o__Rhodobacterales;f__Rhodobacteraceae;g__Cereibacter;
unidentified_Xanthomonadaceae	0	0	0	0	0	0	1.07581e-05	0	0	0	0	2.15163e-05	0	0	0	0	0	0	0	0	0	0	0	0	0	1.07581e-05	0	0	1.07581e-05	1.07581e-05	1.07581e-05	0	0.000623971	0	0	0	1.94244e-05	k__Bacteria;p__Proteobacteria;c__Gammaproteobacteria;o__Xanthomonadales;f__Xanthomonadaceae;g__unidentified_Xanthomonadaceae;
Mogibacterium	0	0	0	0	0	1.07581e-05	1.07581e-05	1.07581e-05	1.07581e-05	0	0.000204404	2.15163e-05	0	0.000161372	2.15163e-05	0	0	0	0	0	1.07581e-05	2.15163e-05	0	0	1.07581e-05	0	0	0	0	0	0	1.07581e-05	0	0	2.15163e-05	4.30325e-05	1.58384e-05	k__Bacteria;p__Firmicutes;c__Clostridia;o__Clostridiales;f__Family_XIII;g__Mogibacterium;
Gemmatimonas	0	0	0	2.15163e-05	0.000462599	0	0	0	0	1.07581e-05	0	0	0	0	0	0	0	0	0	0	0	0	0	0	0	0	1.07581e-05	0	0	0	3.22744e-05	0	0	0	0	0	1.49418e-05	k__Bacteria;p__Gemmatimonadetes;c__unidentified_Gemmatimonadetes;o__Gemmatimonadales;f__Gemmatimonadaceae;g__Gemmatimonas;
Tessaracoccus	0	0	0	0	0	0	0	0	0	0	0	0	0	0	0	0	0	0.000484116	0	0	0	0	0	0	2.15163e-05	0	0	0	0	0	0	0	0	0	0	0	1.40453e-05	k__Bacteria;p__Actinobacteria;c__unidentified_Actinobacteria;o__Propionibacteriales;f__Propionibacteriaceae;g__Tessaracoccus;
Jeotgalicoccus	0	0	2.15163e-05	0	0	0	0	0	1.07581e-05	2.15163e-05	2.15163e-05	1.07581e-05	0	0	0	0	0	0	0	0	0	0	0	0	0	0	0	0	7.53069e-05	0	0	0	0	0	0.00017213	1.07581e-05	9.56278e-06	k__Bacteria;p__Firmicutes;c__Bacilli;o__Bacillales;f__Staphylococcaceae;g__Jeotgalicoccus;
unidentified_Sporolactobacillaceae	0	0	0	0	0	0	0	0	0	0	0	0	1.07581e-05	0	0	0	0	0	0	0	1.07581e-05	1.07581e-05	0.000301228	0	0	0	0	0	0	0	0	0	0	0	0	0	9.26394e-06	k__Bacteria;p__Firmicutes;c__Bacilli;o__Bacillales;f__Sporolactobacillaceae;g__unidentified_Sporolactobacillaceae;
Herbaspirillum	0	0	0	0	0	0	0	0	0	0	0	0	0	2.15163e-05	0.000290469	1.07581e-05	0	0	0	0	0	0	0	0	0	0	0	0	0	0	0	0	0	0	0	0	8.9651e-06	k__Bacteria;p__Proteobacteria;c__Betaproteobacteria;o__Burkholderiales;f__Oxalobacteraceae;g__Herbaspirillum;
Negativicoccus	0	0	4.30325e-05	0	0	0	0	1.07581e-05	0	3.22744e-05	3.22744e-05	2.15163e-05	0	0	0	0	0	0	0	0	0	0	0	0	0	0	0	0	4.30325e-05	0	0	0	0	0	0.000129098	1.07581e-05	8.9651e-06	k__Bacteria;p__Firmicutes;c__Negativicutes;o__Selenomonadales;f__Veillonellaceae;g__Negativicoccus;
Eremococcus	0.000268953	0	0	0	0	0	0	0	0	0	0	0	0	0	0	0	0	0	0	1.07581e-05	0	0	0	0	0	0	0	0	0	0	0	0	0	0	0	0	7.76976e-06	k__Bacteria;p__Firmicutes;c__Bacilli;o__Lactobacillales;f__Aerococcaceae;g__Eremococcus;
Desulfotomaculum	0	1.07581e-05	0	0	0	0	0	1.07581e-05	0	0	2.15163e-05	0.000161372	2.15163e-05	0	0	0	0	0	0	0	0	0	0	0	0	1.07581e-05	0	0	0	0	0	0	2.15163e-05	0	0	1.07581e-05	7.47092e-06	k__Bacteria;p__Firmicutes;c__Clostridia;o__Clostridiales;f__Peptococcaceae;g__Desulfotomaculum;
unidentified_Actinomycetaceae	0	0	0	0	0	0	0	0	0	0	0	0	0	1.07581e-05	0	0.000247437	0	0	0	0	0	0	0	0	0	0	0	0	0	0	0	0	0	0	0	0	7.17208e-06	k__Bacteria;p__Actinobacteria;c__unidentified_Actinobacteria;o__Actinomycetales;f__Actinomycetaceae;g__unidentified_Actinomycetaceae;
Ornithinicoccus	0	0	0	0	0	1.07581e-05	0	0	0	0	0	0	0	0.000161372	2.15163e-05	0	0	0	0	1.07581e-05	1.07581e-05	0	0	0	0	0	0	0	0	0	0	2.15163e-05	0	0	0	0	6.57441e-06	k__Bacteria;p__Actinobacteria;c__unidentified_Actinobacteria;o__Micrococcales;f__Intrasporangiaceae;g__Ornithinicoccus;
Centipeda	2.15163e-05	0	0	0	0	0	0	0	0	0	1.07581e-05	0	0	0	0	0	0	0	8.6065e-05	0	0	0	0	0	8.6065e-05	0	1.07581e-05	0	0	0	0	0	1.07581e-05	0	0	0	6.27557e-06	k__Bacteria;p__Firmicutes;c__Negativicutes;o__Selenomonadales;f__Veillonellaceae;g__Centipeda;
Luteimonas	0	0	0	0	0	0	0	0	0	0	0	0	0	0	0	0	0	0	0	0	0	0	0	0	0	1.07581e-05	0	1.07581e-05	0	1.07581e-05	1.07581e-05	2.15163e-05	9.68231e-05	0	0	0	4.48255e-06	k__Bacteria;p__Proteobacteria;c__Gammaproteobacteria;o__Xanthomonadales;f__Xanthomonadaceae;g__Luteimonas;
Ruminococcaceae_UCG-014	0	0	0	0	0	0	0	0	0	0	0	0	0	0	0	0.000129098	0	0	0	0	0	0	0	0	0	0	0	0	0	0	0	0	0	0	0	0	3.58604e-06	k__Bacteria;p__Firmicutes;c__Clostridia;o__Clostridiales;f__Ruminococcaceae;g__Ruminococcaceae_UCG-014;
Dietzia	0	0	0	0	0	0	0	0	0	0	0	0	1.07581e-05	0	0	0.000107581	0	0	0	0	0	0	0	0	0	0	0	0	0	0	0	0	0	0	0	0	3.2872e-06	k__Bacteria;p__Actinobacteria;c__unidentified_Actinobacteria;o__Corynebacteriales;f__Dietziaceae;g__Dietzia;
Nocardioides	0	0	0	0	0	0	0	0	0	0	0	0	0	0	0	7.53069e-05	0	0	0	0	0	0	0	0	0	0	0	0	0	0	0	0	0	1.07581e-05	0	0	2.39069e-06	k__Bacteria;p__Actinobacteria;c__unidentified_Actinobacteria;o__Propionibacteriales;f__Nocardioidaceae;g__Nocardioides;
Bergeyella	0	0	1.07581e-05	0	0	0	0	0	0	0	0	0	0	0	0	5.37906e-05	0	0	0	0	0	0	0	0	0	0	0	0	0	0	0	0	0	0	2.15163e-05	0	2.39069e-06	k__Bacteria;p__Bacteroidetes;c__Flavobacteriia;o__Flavobacteriales;f__Flavobacteriaceae;g__Bergeyella;
Idiomarina	1.07581e-05	0	0	0	0	0	0	0	0	0	0	0	0	0	0	0	0	0	0	4.30325e-05	0	0	0	0	0	0	0	0	0	0	0	0	0	0	0	0	1.49418e-06	k__Bacteria;p__Proteobacteria;c__Gammaproteobacteria;o__Alteromonadales;f__Idiomarinaceae;g__Idiomarina;
Alcanivorax	1.07581e-05	0	0	0	0	0	0	0	0	0	0	0	0	0	0	0	0	0	0	4.30325e-05	0	0	0	0	0	0	0	0	0	0	0	0	0	0	0	0	1.49418e-06	k__Bacteria;p__Proteobacteria;c__Gammaproteobacteria;o__Oceanospirillales;f__Alcanivoracaceae;g__Alcanivorax;
Methylotenera	0	0	0	0	0	0	0	0	0	0	0	0	0	0	0	0	0	0	0	3.22744e-05	0	0	0	0	0	0	0	0	0	0	0	0	0	0	0	0	8.9651e-07	k__Bacteria;p__Proteobacteria;c__Betaproteobacteria;o__Methylophilales;f__Methylophilaceae;g__Methylotenera;
Alkanindiges	0	0	2.15163e-05	0	1.07581e-05	0	0	0	0	0	0	0	0	0	0	0	0	0	0	0	0	0	0	0	0	0	0	0	0	0	0	0	0	0	0	0	8.9651e-07	k__Bacteria;p__Proteobacteria;c__Gammaproteobacteria;o__Pseudomonadales;f__Moraxellaceae;g__Alkanindiges;
Friedmanniella	0	0	0	0	0	0	2.15163e-05	0	0	0	1.07581e-05	0	0	0	0	0	0	0	0	0	0	0	0	0	0	0	0	0	0	0	0	0	0	0	0	0	8.9651e-07	k__Bacteria;p__Actinobacteria;c__unidentified_Actinobacteria;o__Propionibacteriales;f__Propionibacteriaceae;g__Friedmanniella;
Vibrio	2.15163e-05	0	0	0	0	0	0	0	0	0	0	0	0	0	0	0	0	0	0	0	0	0	0	0	0	0	0	0	0	0	0	0	0	0	0	0	5.97674e-07	k__Bacteria;p__Proteobacteria;c__Gammaproteobacteria;o__Vibrionales;f__Vibrionaceae;g__Vibrio;
Collinsella	1.07581e-05	0	0	0	0	0	0	0	0	0	0	0	0	0	0	0	0	0	0	1.07581e-05	0	0	0	0	0	0	0	0	0	0	0	0	0	0	0	0	5.97674e-07	k__Bacteria;p__Actinobacteria;c__Coriobacteriia;o__Coriobacteriales;f__Coriobacteriaceae;g__Collinsella;
Mobiluncus	0	0	0	0	0	0	0	0	0	0	0	0	0	0	0	0	0	0	0	1.07581e-05	0	0	0	0	0	0	0	0	0	0	0	0	0	0	0	0	2.98837e-07	k__Bacteria;p__Actinobacteria;c__unidentified_Actinobacteria;o__Actinomycetales;f__Actinomycetaceae;g__Mobiluncus;
Acholeplasma	0	0	0	0	0	0	0	0	0	0	0	0	0	0	0	1.07581e-05	0	0	0	0	0	0	0	0	0	0	0	0	0	0	0	0	0	0	0	0	2.98837e-07	k__Bacteria;p__Tenericutes;c__Mollicutes;o__Acholeplasmatales;f__Acholeplasmataceae;g__Acholeplasma;
Rhodobacter	0	0	0	0	0	0	0	0	0	0	0	0	0	0	0	0	0	0	0	0	0	0	0	0	0	0	0	0	1.07581e-05	0	0	0	0	0	0	0	2.98837e-07	k__Bacteria;p__Proteobacteria;c__Alphaproteobacteria;o__Rhodobacterales;f__Rhodobacteraceae;g__Rhodobacter;
[Eubacterium]_rectale_group	1.07581e-05	0	0	0	0	0	0	0	0	0	0	0	0	0	0	0	0	0	0	0	0	0	0	0	0	0	0	0	0	0	0	0	0	0	0	0	2.98837e-07	k__Bacteria;p__Firmicutes;c__Clostridia;o__Clostridiales;f__Lachnospiraceae;g__[Eubacterium]_rectale_group;
Paeniclostridium	0	0	0	0	0	0	0	0	0	0	0	0	0	0	0	0	0	0	0	1.07581e-05	0	0	0	0	0	0	0	0	0	0	0	0	0	0	0	0	2.98837e-07	k__Bacteria;p__Firmicutes;c__Clostridia;o__Clostridiales;f__Peptostreptococcaceae;g__Paeniclostridium;
Selenomonas	0	0	0	0	0	0	0	1.07581e-05	0	0	0	0	0	0	0	0	0	0	0	0	0	0	0	0	0	0	0	0	0	0	0	0	0	0	0	0	2.98837e-07	k__Bacteria;p__Firmicutes;c__Negativicutes;o__Selenomonadales;f__Veillonellaceae;g__Selenomonas;
Solirubrobacter	0	0	0	0	0	0	0	0	0	0	0	0	0	0	0	0	0	0	0	1.07581e-05	0	0	0	0	0	0	0	0	0	0	0	0	0	0	0	0	2.98837e-07	k__Bacteria;p__Actinobacteria;c__Thermoleophilia;o__Solirubrobacterales;f__Solirubrobacteraceae;g__Solirubrobacter;
Thermus	0	0	0	0	0	0	0	0	0	0	1.07581e-05	0	0	0	0	0	0	0	0	0	0	0	0	0	0	0	0	0	0	0	0	0	0	0	0	0	2.98837e-07	k__Bacteria;p__Deinococcus-Thermus;c__Deinococci;o__Thermales;f__Thermaceae;g__Thermus;
Prevotella_1	0	0	0	0	0	0	0	0	0	0	0	0	0	0	0	0	0	0	0	0	0	0	0	0	0	0	0	0	0	0	0	0	0	0	0	0	0	k__Bacteria;p__Bacteroidetes;c__Bacteroidia;o__Bacteroidales;f__Prevotellaceae;g__Prevotella_1;
unidentified_Lachnospiraceae	0	0	0	0	0	0	0	0	0	0	0	0	0	0	0	0	0	0	0	0	0	0	0	0	0	0	0	0	0	0	0	0	0	0	0	0	0	k__Bacteria;p__Firmicutes;c__Clostridia;o__Clostridiales;f__Lachnospiraceae;g__unidentified_Lachnospiraceae;
[Eubacterium]_saphenum_group	0	0	0	0	0	0	0	0	0	0	0	0	0	0	0	0	0	0	0	0	0	0	0	0	0	0	0	0	0	0	0	0	0	0	0	0	0	k__Bacteria;p__Firmicutes;c__Clostridia;o__Clostridiales;f__Family_XIII;g__[Eubacterium]_saphenum_group;
Catonella	0	0	0	0	0	0	0	0	0	0	0	0	0	0	0	0	0	0	0	0	0	0	0	0	0	0	0	0	0	0	0	0	0	0	0	0	0	k__Bacteria;p__Firmicutes;c__Clostridia;o__Clostridiales;f__Lachnospiraceae;g__Catonella;
Phocaeicola	0	0	0	0	0	0	0	0	0	0	0	0	0	0	0	0	0	0	0	0	0	0	0	0	0	0	0	0	0	0	0	0	0	0	0	0	0	k__Bacteria;p__Bacteroidetes;c__Bacteroidia;o__Bacteroidales;f__unidentified_Bacteroidales;g__Phocaeicola;
Mycoplasma	0	0	0	0	0	0	0	0	0	0	0	0	0	0	0	0	0	0	0	0	0	0	0	0	0	0	0	0	0	0	0	0	0	0	0	0	0	k__Bacteria;p__Tenericutes;c__Mollicutes;o__Mycoplasmatales;f__Mycoplasmataceae;g__Mycoplasma;
Butyrivibrio_2	0	0	0	0	0	0	0	0	0	0	0	0	0	0	0	0	0	0	0	0	0	0	0	0	0	0	0	0	0	0	0	0	0	0	0	0	0	k__Bacteria;p__Firmicutes;c__Clostridia;o__Clostridiales;f__Lachnospiraceae;g__Butyrivibrio_2;
Johnsonella	0	0	0	0	0	0	0	0	0	0	0	0	0	0	0	0	0	0	0	0	0	0	0	0	0	0	0	0	0	0	0	0	0	0	0	0	0	k__Bacteria;p__Firmicutes;c__Clostridia;o__Clostridiales;f__Lachnospiraceae;g__Johnsonella;
Pedobacter	0	0	0	0	0	0	0	0	0	0	0	0	0	0	0	0	0	0	0	0	0	0	0	0	0	0	0	0	0	0	0	0	0	0	0	0	0	k__Bacteria;p__Bacteroidetes;c__Sphingobacteriia;o__Sphingobacteriales;f__Sphingobacteriaceae;g__Pedobacter;
Roseburia	0	0	0	0	0	0	0	0	0	0	0	0	0	0	0	0	0	0	0	0	0	0	0	0	0	0	0	0	0	0	0	0	0	0	0	0	0	k__Bacteria;p__Firmicutes;c__Clostridia;o__Clostridiales;f__Lachnospiraceae;g__Roseburia;
Rikenellaceae_RC9_gut_group	0	0	0	0	0	0	0	0	0	0	0	0	0	0	0	0	0	0	0	0	0	0	0	0	0	0	0	0	0	0	0	0	0	0	0	0	0	k__Bacteria;p__Bacteroidetes;c__Bacteroidia;o__Bacteroidales;f__Rikenellaceae;g__Rikenellaceae_RC9_gut_group;
Zobellella	0	0	0	0	0	0	0	0	0	0	0	0	0	0	0	0	0	0	0	0	0	0	0	0	0	0	0	0	0	0	0	0	0	0	0	0	0	k__Bacteria;p__Proteobacteria;c__Gammaproteobacteria;o__Aeromonadales;f__Aeromonadaceae;g__Zobellella;
Kingella	0	0	0	0	0	0	0	0	0	0	0	0	0	0	0	0	0	0	0	0	0	0	0	0	0	0	0	0	0	0	0	0	0	0	0	0	0	k__Bacteria;p__Proteobacteria;c__Betaproteobacteria;o__Neisseriales;f__Neisseriaceae;g__Kingella;
Alistipes	0	0	0	0	0	0	0	0	0	0	0	0	0	0	0	0	0	0	0	0	0	0	0	0	0	0	0	0	0	0	0	0	0	0	0	0	0	k__Bacteria;p__Bacteroidetes;c__Bacteroidia;o__Bacteroidales;f__Rikenellaceae;g__Alistipes;
Alysiella	0	0	0	0	0	0	0	0	0	0	0	0	0	0	0	0	0	0	0	0	0	0	0	0	0	0	0	0	0	0	0	0	0	0	0	0	0	k__Bacteria;p__Proteobacteria;c__Betaproteobacteria;o__Neisseriales;f__Neisseriaceae;g__Alysiella;
Alloscardovia	0	0	0	0	0	0	0	0	0	0	0	0	0	0	0	0	0	0	0	0	0	0	0	0	0	0	0	0	0	0	0	0	0	0	0	0	0	k__Bacteria;p__Actinobacteria;c__unidentified_Actinobacteria;o__Bifidobacteriales;f__Bifidobacteriaceae;g__Alloscardovia;
unidentified_Clostridiales_vadinBB60_group	0	0	0	0	0	0	0	0	0	0	0	0	0	0	0	0	0	0	0	0	0	0	0	0	0	0	0	0	0	0	0	0	0	0	0	0	0	k__Bacteria;p__Firmicutes;c__Clostridia;o__Clostridiales;f__Clostridiales_vadinBB60_group;g__unidentified_Clostridiales_vadinBB60_group;
unidentified_Lentimicrobiaceae	0	0	0	0	0	0	0	0	0	0	0	0	0	0	0	0	0	0	0	0	0	0	0	0	0	0	0	0	0	0	0	0	0	0	0	0	0	k__Bacteria;p__Bacteroidetes;c__Sphingobacteriia;o__Sphingobacteriales;f__Lentimicrobiaceae;g__unidentified_Lentimicrobiaceae;
Salinicola	0	0	0	0	0	0	0	0	0	0	0	0	0	0	0	0	0	0	0	0	0	0	0	0	0	0	0	0	0	0	0	0	0	0	0	0	0	k__Bacteria;p__Proteobacteria;c__Gammaproteobacteria;o__Oceanospirillales;f__Halomonadaceae;g__Salinicola;
Ruminococcaceae_UCG-002	0	0	0	0	0	0	0	0	0	0	0	0	0	0	0	0	0	0	0	0	0	0	0	0	0	0	0	0	0	0	0	0	0	0	0	0	0	k__Bacteria;p__Firmicutes;c__Clostridia;o__Clostridiales;f__Ruminococcaceae;g__Ruminococcaceae_UCG-002;
Faecalibacterium	0	0	0	0	0	0	0	0	0	0	0	0	0	0	0	0	0	0	0	0	0	0	0	0	0	0	0	0	0	0	0	0	0	0	0	0	0	k__Bacteria;p__Firmicutes;c__Clostridia;o__Clostridiales;f__Ruminococcaceae;g__Faecalibacterium;
[Eubacterium]_coprostanoligenes_group	0	0	0	0	0	0	0	0	0	0	0	0	0	0	0	0	0	0	0	0	0	0	0	0	0	0	0	0	0	0	0	0	0	0	0	0	0	k__Bacteria;p__Firmicutes;c__Clostridia;o__Clostridiales;f__Ruminococcaceae;g__[Eubacterium]_coprostanoligenes_group;
Fluviicola	0	0	0	0	0	0	0	0	0	0	0	0	0	0	0	0	0	0	0	0	0	0	0	0	0	0	0	0	0	0	0	0	0	0	0	0	0	k__Bacteria;p__Bacteroidetes;c__Flavobacteriia;o__Flavobacteriales;f__Cryomorphaceae;g__Fluviicola;
Rhodocytophaga	0	0	0	0	0	0	0	0	0	0	0	0	0	0	0	0	0	0	0	0	0	0	0	0	0	0	0	0	0	0	0	0	0	0	0	0	0	k__Bacteria;p__Bacteroidetes;c__Cytophagia;o__Cytophagales;f__Cytophagaceae;g__Rhodocytophaga;
Sphingorhabdus	0	0	0	0	0	0	0	0	0	0	0	0	0	0	0	0	0	0	0	0	0	0	0	0	0	0	0	0	0	0	0	0	0	0	0	0	0	k__Bacteria;p__Proteobacteria;c__Alphaproteobacteria;o__Sphingomonadales;f__Sphingomonadaceae;g__Sphingorhabdus;
Tardiphaga	0	0	0	0	0	0	0	0	0	0	0	0	0	0	0	0	0	0	0	0	0	0	0	0	0	0	0	0	0	0	0	0	0	0	0	0	0	k__Bacteria;p__Proteobacteria;c__Alphaproteobacteria;o__Rhizobiales;f__Bradyrhizobiaceae;g__Tardiphaga;
Clostridium_sensu_stricto_5	0	0	0	0	0	0	0	0	0	0	0	0	0	0	0	0	0	0	0	0	0	0	0	0	0	0	0	0	0	0	0	0	0	0	0	0	0	k__Bacteria;p__Firmicutes;c__Clostridia;o__Clostridiales;f__Clostridiaceae_1;g__Clostridium_sensu_stricto_5;
Lutispora	0	0	0	0	0	0	0	0	0	0	0	0	0	0	0	0	0	0	0	0	0	0	0	0	0	0	0	0	0	0	0	0	0	0	0	0	0	k__Bacteria;p__Firmicutes;c__Clostridia;o__Clostridiales;f__Gracilibacteraceae;g__Lutispora;
Desulfovibrio	0	0	0	0	0	0	0	0	0	0	0	0	0	0	0	0	0	0	0	0	0	0	0	0	0	0	0	0	0	0	0	0	0	0	0	0	0	k__Bacteria;p__Proteobacteria;c__Deltaproteobacteria;o__Desulfovibrionales;f__Desulfovibrionaceae;g__Desulfovibrio;
[Ruminococcus]_gnavus_group	0	0	0	0	0	0	0	0	0	0	0	0	0	0	0	0	0	0	0	0	0	0	0	0	0	0	0	0	0	0	0	0	0	0	0	0	0	k__Bacteria;p__Firmicutes;c__Clostridia;o__Clostridiales;f__Lachnospiraceae;g__[Ruminococcus]_gnavus_group;
Cytophaga	0	0	0	0	0	0	0	0	0	0	0	0	0	0	0	0	0	0	0	0	0	0	0	0	0	0	0	0	0	0	0	0	0	0	0	0	0	k__Bacteria;p__Bacteroidetes;c__Cytophagia;o__Cytophagales;f__Cytophagaceae;g__Cytophaga;
Sporosarcina	0	0	0	0	0	0	0	0	0	0	0	0	0	0	0	0	0	0	0	0	0	0	0	0	0	0	0	0	0	0	0	0	0	0	0	0	0	k__Bacteria;p__Firmicutes;c__Bacilli;o__Bacillales;f__Planococcaceae;g__Sporosarcina;
Defluviitaleaceae_UCG-011	0	0	0	0	0	0	0	0	0	0	0	0	0	0	0	0	0	0	0	0	0	0	0	0	0	0	0	0	0	0	0	0	0	0	0	0	0	k__Bacteria;p__Firmicutes;c__Clostridia;o__Clostridiales;f__Defluviitaleaceae;g__Defluviitaleaceae_UCG-011;
Cellvibrio	0	0	0	0	0	0	0	0	0	0	0	0	0	0	0	0	0	0	0	0	0	0	0	0	0	0	0	0	0	0	0	0	0	0	0	0	0	k__Bacteria;p__Proteobacteria;c__Gammaproteobacteria;o__Cellvibrionales;f__Cellvibrionaceae;g__Cellvibrio;
Parapusillimonas	0	0	0	0	0	0	0	0	0	0	0	0	0	0	0	0	0	0	0	0	0	0	0	0	0	0	0	0	0	0	0	0	0	0	0	0	0	k__Bacteria;p__Proteobacteria;c__Betaproteobacteria;o__Burkholderiales;f__Alcaligenaceae;g__Parapusillimonas;
Simonsiella	0	0	0	0	0	0	0	0	0	0	0	0	0	0	0	0	0	0	0	0	0	0	0	0	0	0	0	0	0	0	0	0	0	0	0	0	0	k__Bacteria;p__Proteobacteria;c__Betaproteobacteria;o__Neisseriales;f__Neisseriaceae;g__Simonsiella;
Nakamurella	0	0	0	0	0	0	0	0	0	0	0	0	0	0	0	0	0	0	0	0	0	0	0	0	0	0	0	0	0	0	0	0	0	0	0	0	0	k__Bacteria;p__Actinobacteria;c__unidentified_Actinobacteria;o__Frankiales;f__Nakamurellaceae;g__Nakamurella;
Alishewanella	0	0	0	0	0	0	0	0	0	0	0	0	0	0	0	0	0	0	0	0	0	0	0	0	0	0	0	0	0	0	0	0	0	0	0	0	0	k__Bacteria;p__Proteobacteria;c__Gammaproteobacteria;o__Alteromonadales;f__Alteromonadaceae;g__Alishewanella;
Ornithinimicrobium	0	0	0	0	0	0	0	0	0	0	0	0	0	0	0	0	0	0	0	0	0	0	0	0	0	0	0	0	0	0	0	0	0	0	0	0	0	k__Bacteria;p__Actinobacteria;c__unidentified_Actinobacteria;o__Micrococcales;f__Intrasporangiaceae;g__Ornithinimicrobium;
Methylophilus	0	0	0	0	0	0	0	0	0	0	0	0	0	0	0	0	0	0	0	0	0	0	0	0	0	0	0	0	0	0	0	0	0	0	0	0	0	k__Bacteria;p__Proteobacteria;c__Betaproteobacteria;o__Methylophilales;f__Methylophilaceae;g__Methylophilus;
Thioclava	0	0	0	0	0	0	0	0	0	0	0	0	0	0	0	0	0	0	0	0	0	0	0	0	0	0	0	0	0	0	0	0	0	0	0	0	0	k__Bacteria;p__Proteobacteria;c__Alphaproteobacteria;o__Rhodobacterales;f__Rhodobacteraceae;g__Thioclava;
Achromobacter	0	0	0	0	0	0	0	0	0	0	0	0	0	0	0	0	0	0	0	0	0	0	0	0	0	0	0	0	0	0	0	0	0	0	0	0	0	k__Bacteria;p__Proteobacteria;c__Betaproteobacteria;o__Burkholderiales;f__Alcaligenaceae;g__Achromobacter;
Lysinibacillus	0	0	0	0	0	0	0	0	0	0	0	0	0	0	0	0	0	0	0	0	0	0	0	0	0	0	0	0	0	0	0	0	0	0	0	0	0	k__Bacteria;p__Firmicutes;c__Bacilli;o__Bacillales;f__Planococcaceae;g__Lysinibacillus;
Marmoricola	0	0	0	0	0	0	0	0	0	0	0	0	0	0	0	0	0	0	0	0	0	0	0	0	0	0	0	0	0	0	0	0	0	0	0	0	0	k__Bacteria;p__Actinobacteria;c__unidentified_Actinobacteria;o__Propionibacteriales;f__Nocardioidaceae;g__Marmoricola;
Cnuella	0	0	0	0	0	0	0	0	0	0	0	0	0	0	0	0	0	0	0	0	0	0	0	0	0	0	0	0	0	0	0	0	0	0	0	0	0	k__Bacteria;p__Bacteroidetes;c__Sphingobacteriia;o__Sphingobacteriales;f__Chitinophagaceae;g__Cnuella;
Agromyces	0	0	0	0	0	0	0	0	0	0	0	0	0	0	0	0	0	0	0	0	0	0	0	0	0	0	0	0	0	0	0	0	0	0	0	0	0	k__Bacteria;p__Actinobacteria;c__unidentified_Actinobacteria;o__Micrococcales;f__Microbacteriaceae;g__Agromyces;
Empedobacter	0	0	0	0	0	0	0	0	0	0	0	0	0	0	0	0	0	0	0	0	0	0	0	0	0	0	0	0	0	0	0	0	0	0	0	0	0	k__Bacteria;p__Bacteroidetes;c__Flavobacteriia;o__Flavobacteriales;f__Flavobacteriaceae;g__Empedobacter;
Marinobacter	0	0	0	0	0	0	0	0	0	0	0	0	0	0	0	0	0	0	0	0	0	0	0	0	0	0	0	0	0	0	0	0	0	0	0	0	0	k__Bacteria;p__Proteobacteria;c__Gammaproteobacteria;o__Alteromonadales;f__Alteromonadaceae;g__Marinobacter;
Jeotgalibacillus	0	0	0	0	0	0	0	0	0	0	0	0	0	0	0	0	0	0	0	0	0	0	0	0	0	0	0	0	0	0	0	0	0	0	0	0	0	k__Bacteria;p__Firmicutes;c__Bacilli;o__Bacillales;f__Planococcaceae;g__Jeotgalibacillus;
Lachnoclostridium	0	0	0	0	0	0	0	0	0	0	0	0	0	0	0	0	0	0	0	0	0	0	0	0	0	0	0	0	0	0	0	0	0	0	0	0	0	k__Bacteria;p__Firmicutes;c__Clostridia;o__Clostridiales;f__Lachnospiraceae;g__Lachnoclostridium;
Mesorhizobium	0	0	0	0	0	0	0	0	0	0	0	0	0	0	0	0	0	0	0	0	0	0	0	0	0	0	0	0	0	0	0	0	0	0	0	0	0	k__Bacteria;p__Proteobacteria;c__Alphaproteobacteria;o__Rhizobiales;f__Phyllobacteriaceae;g__Mesorhizobium;
Bilophila	0	0	0	0	0	0	0	0	0	0	0	0	0	0	0	0	0	0	0	0	0	0	0	0	0	0	0	0	0	0	0	0	0	0	0	0	0	k__Bacteria;p__Proteobacteria;c__Deltaproteobacteria;o__Desulfovibrionales;f__Desulfovibrionaceae;g__Bilophila;
Moryella	0	0	0	0	0	0	0	0	0	0	0	0	0	0	0	0	0	0	0	0	0	0	0	0	0	0	0	0	0	0	0	0	0	0	0	0	0	k__Bacteria;p__Firmicutes;c__Clostridia;o__Clostridiales;f__Lachnospiraceae;g__Moryella;
Spirosoma	0	0	0	0	0	0	0	0	0	0	0	0	0	0	0	0	0	0	0	0	0	0	0	0	0	0	0	0	0	0	0	0	0	0	0	0	0	k__Bacteria;p__Bacteroidetes;c__Cytophagia;o__Cytophagales;f__Cytophagaceae;g__Spirosoma;
Selenomonas_3	0	0	0	0	0	0	0	0	0	0	0	0	0	0	0	0	0	0	0	0	0	0	0	0	0	0	0	0	0	0	0	0	0	0	0	0	0	k__Bacteria;p__Firmicutes;c__Negativicutes;o__Selenomonadales;f__Veillonellaceae;g__Selenomonas_3;
Dermabacter	0	0	0	0	0	0	0	0	0	0	0	0	0	0	0	0	0	0	0	0	0	0	0	0	0	0	0	0	0	0	0	0	0	0	0	0	0	k__Bacteria;p__Actinobacteria;c__unidentified_Actinobacteria;o__Micrococcales;f__Dermabacteraceae;g__Dermabacter;
Coprococcus_1	0	0	0	0	0	0	0	0	0	0	0	0	0	0	0	0	0	0	0	0	0	0	0	0	0	0	0	0	0	0	0	0	0	0	0	0	0	k__Bacteria;p__Firmicutes;c__Clostridia;o__Clostridiales;f__Lachnospiraceae;g__Coprococcus_1;
Blautia	0	0	0	0	0	0	0	0	0	0	0	0	0	0	0	0	0	0	0	0	0	0	0	0	0	0	0	0	0	0	0	0	0	0	0	0	0	k__Bacteria;p__Firmicutes;c__Clostridia;o__Clostridiales;f__Lachnospiraceae;g__Blautia;
Catenovulum	0	0	0	0	0	0	0	0	0	0	0	0	0	0	0	0	0	0	0	0	0	0	0	0	0	0	0	0	0	0	0	0	0	0	0	0	0	k__Bacteria;p__Proteobacteria;c__Gammaproteobacteria;o__Alteromonadales;f__Alteromonadaceae;g__Catenovulum;
Bradyrhizobium	0	0	0	0	0	0	0	0	0	0	0	0	0	0	0	0	0	0	0	0	0	0	0	0	0	0	0	0	0	0	0	0	0	0	0	0	0	k__Bacteria;p__Proteobacteria;c__Alphaproteobacteria;o__Rhizobiales;f__Bradyrhizobiaceae;g__Bradyrhizobium;
Ruminiclostridium_5	0	0	0	0	0	0	0	0	0	0	0	0	0	0	0	0	0	0	0	0	0	0	0	0	0	0	0	0	0	0	0	0	0	0	0	0	0	k__Bacteria;p__Firmicutes;c__Clostridia;o__Clostridiales;f__Ruminococcaceae;g__Ruminiclostridium_5;
Cupriavidus	0	0	0	0	0	0	0	0	0	0	0	0	0	0	0	0	0	0	0	0	0	0	0	0	0	0	0	0	0	0	0	0	0	0	0	0	0	k__Bacteria;p__Proteobacteria;c__Betaproteobacteria;o__Burkholderiales;f__Burkholderiaceae;g__Cupriavidus;
Variibacter	0	0	0	0	0	0	0	0	0	0	0	0	0	0	0	0	0	0	0	0	0	0	0	0	0	0	0	0	0	0	0	0	0	0	0	0	0	k__Bacteria;p__Proteobacteria;c__Alphaproteobacteria;o__Rhizobiales;f__Xanthobacteraceae;g__Variibacter;
Verticia	0	0	0	0	0	0	0	0	0	0	0	0	0	0	0	0	0	0	0	0	0	0	0	0	0	0	0	0	0	0	0	0	0	0	0	0	0	k__Bacteria;p__Proteobacteria;c__Betaproteobacteria;o__Burkholderiales;f__Alcaligenaceae;g__Verticia;
Candidatus_Planktophila	0	0	0	0	0	0	0	0	0	0	0	0	0	0	0	0	0	0	0	0	0	0	0	0	0	0	0	0	0	0	0	0	0	0	0	0	0	k__Bacteria;p__Actinobacteria;c__unidentified_Actinobacteria;o__Frankiales;f__Sporichthyaceae;g__Candidatus_Planktophila;
Salana	0	0	0	0	0	0	0	0	0	0	0	0	0	0	0	0	0	0	0	0	0	0	0	0	0	0	0	0	0	0	0	0	0	0	0	0	0	k__Bacteria;p__Actinobacteria;c__unidentified_Actinobacteria;o__Micrococcales;f__Beutenbergiaceae;g__Salana;
Spongiibacter	0	0	0	0	0	0	0	0	0	0	0	0	0	0	0	0	0	0	0	0	0	0	0	0	0	0	0	0	0	0	0	0	0	0	0	0	0	k__Bacteria;p__Proteobacteria;c__Gammaproteobacteria;o__Cellvibrionales;f__Spongiibacteraceae;g__Spongiibacter;
Pseudonocardia	0	0	0	0	0	0	0	0	0	0	0	0	0	0	0	0	0	0	0	0	0	0	0	0	0	0	0	0	0	0	0	0	0	0	0	0	0	k__Bacteria;p__Actinobacteria;c__unidentified_Actinobacteria;o__Pseudonocardiales;f__Pseudonocardiaceae;g__Pseudonocardia;
Alloiococcus	0	0	0	0	0	0	0	0	0	0	0	0	0	0	0	0	0	0	0	0	0	0	0	0	0	0	0	0	0	0	0	0	0	0	0	0	0	k__Bacteria;p__Firmicutes;c__Bacilli;o__Lactobacillales;f__Carnobacteriaceae;g__Alloiococcus;
Thiothrix	0	0	0	0	0	0	0	0	0	0	0	0	0	0	0	0	0	0	0	0	0	0	0	0	0	0	0	0	0	0	0	0	0	0	0	0	0	k__Bacteria;p__Proteobacteria;c__Gammaproteobacteria;o__Thiotrichales;f__Thiotrichaceae;g__Thiothrix;
Amycolatopsis	0	0	0	0	0	0	0	0	0	0	0	0	0	0	0	0	0	0	0	0	0	0	0	0	0	0	0	0	0	0	0	0	0	0	0	0	0	k__Bacteria;p__Actinobacteria;c__unidentified_Actinobacteria;o__Pseudonocardiales;f__Pseudonocardiaceae;g__Amycolatopsis;
Micavibrio	0	0	0	0	0	0	0	0	0	0	0	0	0	0	0	0	0	0	0	0	0	0	0	0	0	0	0	0	0	0	0	0	0	0	0	0	0	k__Bacteria;p__Proteobacteria;c__Alphaproteobacteria;o__unidentified_Alphaproteobacteria;f__unidentified_Alphaproteobacteria;g__Micavibrio;
Alcaligenes	0	0	0	0	0	0	0	0	0	0	0	0	0	0	0	0	0	0	0	0	0	0	0	0	0	0	0	0	0	0	0	0	0	0	0	0	0	k__Bacteria;p__Proteobacteria;c__Betaproteobacteria;o__Burkholderiales;f__Alcaligenaceae;g__Alcaligenes;
Clostridium_sensu_stricto_1	0	0	0	0	0	0	0	0	0	0	0	0	0	0	0	0	0	0	0	0	0	0	0	0	0	0	0	0	0	0	0	0	0	0	0	0	0	k__Bacteria;p__Firmicutes;c__Clostridia;o__Clostridiales;f__Clostridiaceae_1;g__Clostridium_sensu_stricto_1;
Dyadobacter	0	0	0	0	0	0	0	0	0	0	0	0	0	0	0	0	0	0	0	0	0	0	0	0	0	0	0	0	0	0	0	0	0	0	0	0	0	k__Bacteria;p__Bacteroidetes;c__Cytophagia;o__Cytophagales;f__Cytophagaceae;g__Dyadobacter;
Steroidobacter	0	0	0	0	0	0	0	0	0	0	0	0	0	0	0	0	0	0	0	0	0	0	0	0	0	0	0	0	0	0	0	0	0	0	0	0	0	k__Bacteria;p__Proteobacteria;c__Gammaproteobacteria;o__Xanthomonadales;f__unidentified_Xanthomonadales;g__Steroidobacter;
Devosia	0	0	0	0	0	0	0	0	0	0	0	0	0	0	0	0	0	0	0	0	0	0	0	0	0	0	0	0	0	0	0	0	0	0	0	0	0	k__Bacteria;p__Proteobacteria;c__Alphaproteobacteria;o__Rhizobiales;f__Hyphomicrobiaceae;g__Devosia;
Ferruginibacter	0	0	0	0	0	0	0	0	0	0	0	0	0	0	0	0	0	0	0	0	0	0	0	0	0	0	0	0	0	0	0	0	0	0	0	0	0	k__Bacteria;p__Bacteroidetes;c__Sphingobacteriia;o__Sphingobacteriales;f__Chitinophagaceae;g__Ferruginibacter;
Rickettsia	0	0	0	0	0	0	0	0	0	0	0	0	0	0	0	0	0	0	0	0	0	0	0	0	0	0	0	0	0	0	0	0	0	0	0	0	0	k__Bacteria;p__Proteobacteria;c__Alphaproteobacteria;o__Rickettsiales;f__Rickettsiaceae;g__Rickettsia;
Castellaniella	0	0	0	0	0	0	0	0	0	0	0	0	0	0	0	0	0	0	0	0	0	0	0	0	0	0	0	0	0	0	0	0	0	0	0	0	0	k__Bacteria;p__Proteobacteria;c__Betaproteobacteria;o__Burkholderiales;f__Alcaligenaceae;g__Castellaniella;
Rickettsiella	0	0	0	0	0	0	0	0	0	0	0	0	0	0	0	0	0	0	0	0	0	0	0	0	0	0	0	0	0	0	0	0	0	0	0	0	0	k__Bacteria;p__Proteobacteria;c__Gammaproteobacteria;o__Legionellales;f__Coxiellaceae;g__Rickettsiella;
Haloactinopolyspora	0	0	0	0	0	0	0	0	0	0	0	0	0	0	0	0	0	0	0	0	0	0	0	0	0	0	0	0	0	0	0	0	0	0	0	0	0	k__Bacteria;p__Actinobacteria;c__unidentified_Actinobacteria;o__Propionibacteriales;f__Propionibacteriaceae;g__Haloactinopolyspora;
Fodinicola	0	0	0	0	0	0	0	0	0	0	0	0	0	0	0	0	0	0	0	0	0	0	0	0	0	0	0	0	0	0	0	0	0	0	0	0	0	k__Bacteria;p__Actinobacteria;c__unidentified_Actinobacteria;o__Frankiales;f__Cryptosporangiaceae;g__Fodinicola;
Delftia	0	0	0	0	0	0	0	0	0	0	0	0	0	0	0	0	0	0	0	0	0	0	0	0	0	0	0	0	0	0	0	0	0	0	0	0	0	k__Bacteria;p__Proteobacteria;c__Betaproteobacteria;o__Burkholderiales;f__Comamonadaceae;g__Delftia;
Galbibacter	0	0	0	0	0	0	0	0	0	0	0	0	0	0	0	0	0	0	0	0	0	0	0	0	0	0	0	0	0	0	0	0	0	0	0	0	0	k__Bacteria;p__Bacteroidetes;c__Flavobacteriia;o__Flavobacteriales;f__Flavobacteriaceae;g__Galbibacter;
Slackia	0	0	0	0	0	0	0	0	0	0	0	0	0	0	0	0	0	0	0	0	0	0	0	0	0	0	0	0	0	0	0	0	0	0	0	0	0	k__Bacteria;p__Actinobacteria;c__Coriobacteriia;o__Coriobacteriales;f__Coriobacteriaceae;g__Slackia;
unidentified_Prevotellaceae	0	0	0	0	0	0	0	0	0	0	0	0	0	0	0	0	0	0	0	0	0	0	0	0	0	0	0	0	0	0	0	0	0	0	0	0	0	k__Bacteria;p__Bacteroidetes;c__Bacteroidia;o__Bacteroidales;f__Prevotellaceae;g__unidentified_Prevotellaceae;
Altererythrobacter	0	0	0	0	0	0	0	0	0	0	0	0	0	0	0	0	0	0	0	0	0	0	0	0	0	0	0	0	0	0	0	0	0	0	0	0	0	k__Bacteria;p__Proteobacteria;c__Alphaproteobacteria;o__Sphingomonadales;f__Erythrobacteraceae;g__Altererythrobacter;
unidentified_Ruminococcaceae	0	0	0	0	0	0	0	0	0	0	0	0	0	0	0	0	0	0	0	0	0	0	0	0	0	0	0	0	0	0	0	0	0	0	0	0	0	k__Bacteria;p__Firmicutes;c__Clostridia;o__Clostridiales;f__Ruminococcaceae;g__unidentified_Ruminococcaceae;
Nubsella	0	0	0	0	0	0	0	0	0	0	0	0	0	0	0	0	0	0	0	0	0	0	0	0	0	0	0	0	0	0	0	0	0	0	0	0	0	k__Bacteria;p__Bacteroidetes;c__Sphingobacteriia;o__Sphingobacteriales;f__Sphingobacteriaceae;g__Nubsella;
Alsobacter	0	0	0	0	0	0	0	0	0	0	0	0	0	0	0	0	0	0	0	0	0	0	0	0	0	0	0	0	0	0	0	0	0	0	0	0	0	k__Bacteria;p__Proteobacteria;c__Alphaproteobacteria;o__Rhizobiales;f__unidentified_Rhizobiales;g__Alsobacter;
Reyranella	0	0	0	0	0	0	0	0	0	0	0	0	0	0	0	0	0	0	0	0	0	0	0	0	0	0	0	0	0	0	0	0	0	0	0	0	0	k__Bacteria;p__Proteobacteria;c__Alphaproteobacteria;o__Rhodospirillales;f__unidentified_Rhodospirillales;g__Reyranella;
unidentified_Saccharibacteria	0	0	0	0	0	0	0	0	0	0	0	0	0	0	0	0	0	0	0	0	0	0	0	0	0	0	0	0	0	0	0	0	0	0	0	0	0	k__Bacteria;p__Saccharibacteria;c__unidentified_Saccharibacteria;o__unidentified_Saccharibacteria;f__unidentified_Saccharibacteria;g__unidentified_Saccharibacteria;
Phenylobacterium	0	0	0	0	0	0	0	0	0	0	0	0	0	0	0	0	0	0	0	0	0	0	0	0	0	0	0	0	0	0	0	0	0	0	0	0	0	k__Bacteria;p__Proteobacteria;c__Alphaproteobacteria;o__Caulobacterales;f__Caulobacteraceae;g__Phenylobacterium;
Olsenella	0	0	0	0	0	0	0	0	0	0	0	0	0	0	0	0	0	0	0	0	0	0	0	0	0	0	0	0	0	0	0	0	0	0	0	0	0	k__Bacteria;p__Actinobacteria;c__Coriobacteriia;o__Coriobacteriales;f__Coriobacteriaceae;g__Olsenella;
Dorea	0	0	0	0	0	0	0	0	0	0	0	0	0	0	0	0	0	0	0	0	0	0	0	0	0	0	0	0	0	0	0	0	0	0	0	0	0	k__Bacteria;p__Firmicutes;c__Clostridia;o__Clostridiales;f__Lachnospiraceae;g__Dorea;
Tolumonas	0	0	0	0	0	0	0	0	0	0	0	0	0	0	0	0	0	0	0	0	0	0	0	0	0	0	0	0	0	0	0	0	0	0	0	0	0	k__Bacteria;p__Proteobacteria;c__Gammaproteobacteria;o__Aeromonadales;f__Aeromonadaceae;g__Tolumonas;
Megasphaera	0	0	0	0	0	0	0	0	0	0	0	0	0	0	0	0	0	0	0	0	0	0	0	0	0	0	0	0	0	0	0	0	0	0	0	0	0	k__Bacteria;p__Firmicutes;c__Negativicutes;o__Selenomonadales;f__Veillonellaceae;g__Megasphaera;
Aeriscardovia	0	0	0	0	0	0	0	0	0	0	0	0	0	0	0	0	0	0	0	0	0	0	0	0	0	0	0	0	0	0	0	0	0	0	0	0	0	k__Bacteria;p__Actinobacteria;c__unidentified_Actinobacteria;o__Bifidobacteriales;f__Bifidobacteriaceae;g__Aeriscardovia;
Scardovia	0	0	0	0	0	0	0	0	0	0	0	0	0	0	0	0	0	0	0	0	0	0	0	0	0	0	0	0	0	0	0	0	0	0	0	0	0	k__Bacteria;p__Actinobacteria;c__unidentified_Actinobacteria;o__Bifidobacteriales;f__Bifidobacteriaceae;g__Scardovia;
Peredibacter	0	0	0	0	0	0	0	0	0	0	0	0	0	0	0	0	0	0	0	0	0	0	0	0	0	0	0	0	0	0	0	0	0	0	0	0	0	k__Bacteria;p__Proteobacteria;c__Deltaproteobacteria;o__Bdellovibrionales;f__Bacteriovoracaceae;g__Peredibacter;
Acetobacter	0	0	0	0	0	0	0	0	0	0	0	0	0	0	0	0	0	0	0	0	0	0	0	0	0	0	0	0	0	0	0	0	0	0	0	0	0	k__Bacteria;p__Proteobacteria;c__Alphaproteobacteria;o__Rhodospirillales;f__Acetobacteraceae;g__Acetobacter;
Photobacterium	0	0	0	0	0	0	0	0	0	0	0	0	0	0	0	0	0	0	0	0	0	0	0	0	0	0	0	0	0	0	0	0	0	0	0	0	0	k__Bacteria;p__Proteobacteria;c__Gammaproteobacteria;o__Vibrionales;f__Vibrionaceae;g__Photobacterium;
Sanguibacter	0	0	0	0	0	0	0	0	0	0	0	0	0	0	0	0	0	0	0	0	0	0	0	0	0	0	0	0	0	0	0	0	0	0	0	0	0	k__Bacteria;p__Actinobacteria;c__unidentified_Actinobacteria;o__Micrococcales;f__Sanguibacteraceae;g__Sanguibacter;
Defluviicoccus	0	0	0	0	0	0	0	0	0	0	0	0	0	0	0	0	0	0	0	0	0	0	0	0	0	0	0	0	0	0	0	0	0	0	0	0	0	k__Bacteria;p__Proteobacteria;c__Alphaproteobacteria;o__Rhodospirillales;f__Rhodospirillaceae;g__Defluviicoccus;
Gardnerella	0	0	0	0	0	0	0	0	0	0	0	0	0	0	0	0	0	0	0	0	0	0	0	0	0	0	0	0	0	0	0	0	0	0	0	0	0	k__Bacteria;p__Actinobacteria;c__unidentified_Actinobacteria;o__Bifidobacteriales;f__Bifidobacteriaceae;g__Gardnerella;
Prevotellaceae_UCG-004	0	0	0	0	0	0	0	0	0	0	0	0	0	0	0	0	0	0	0	0	0	0	0	0	0	0	0	0	0	0	0	0	0	0	0	0	0	k__Bacteria;p__Bacteroidetes;c__Bacteroidia;o__Bacteroidales;f__Prevotellaceae;g__Prevotellaceae_UCG-004;
Family_XIII_UCG-001	0	0	0	0	0	0	0	0	0	0	0	0	0	0	0	0	0	0	0	0	0	0	0	0	0	0	0	0	0	0	0	0	0	0	0	0	0	k__Bacteria;p__Firmicutes;c__Clostridia;o__Clostridiales;f__Family_XIII;g__Family_XIII_UCG-001;
vadinBC27_wastewater-sludge_group	0	0	0	0	0	0	0	0	0	0	0	0	0	0	0	0	0	0	0	0	0	0	0	0	0	0	0	0	0	0	0	0	0	0	0	0	0	k__Bacteria;p__Bacteroidetes;c__Bacteroidia;o__Bacteroidales;f__Rikenellaceae;g__vadinBC27_wastewater-sludge_group;
hgcI_clade	0	0	0	0	0	0	0	0	0	0	0	0	0	0	0	0	0	0	0	0	0	0	0	0	0	0	0	0	0	0	0	0	0	0	0	0	0	k__Bacteria;p__Actinobacteria;c__unidentified_Actinobacteria;o__Frankiales;f__Sporichthyaceae;g__hgcI_clade;
Wolinella	0	0	0	0	0	0	0	0	0	0	0	0	0	0	0	0	0	0	0	0	0	0	0	0	0	0	0	0	0	0	0	0	0	0	0	0	0	k__Bacteria;p__Proteobacteria;c__Epsilonproteobacteria;o__Campylobacterales;f__Helicobacteraceae;g__Wolinella;
Shuttleworthia	0	0	0	0	0	0	0	0	0	0	0	0	0	0	0	0	0	0	0	0	0	0	0	0	0	0	0	0	0	0	0	0	0	0	0	0	0	k__Bacteria;p__Firmicutes;c__Clostridia;o__Clostridiales;f__Lachnospiraceae;g__Shuttleworthia;
Propionimicrobium	0	0	0	0	0	0	0	0	0	0	0	0	0	0	0	0	0	0	0	0	0	0	0	0	0	0	0	0	0	0	0	0	0	0	0	0	0	k__Bacteria;p__Actinobacteria;c__unidentified_Actinobacteria;o__Propionibacteriales;f__Propionibacteriaceae;g__Propionimicrobium;
Butyricicoccus	0	0	0	0	0	0	0	0	0	0	0	0	0	0	0	0	0	0	0	0	0	0	0	0	0	0	0	0	0	0	0	0	0	0	0	0	0	k__Bacteria;p__Firmicutes;c__Clostridia;o__Clostridiales;f__Ruminococcaceae;g__Butyricicoccus;
Sediminibacterium	0	0	0	0	0	0	0	0	0	0	0	0	0	0	0	0	0	0	0	0	0	0	0	0	0	0	0	0	0	0	0	0	0	0	0	0	0	k__Bacteria;p__Bacteroidetes;c__Sphingobacteriia;o__Sphingobacteriales;f__Chitinophagaceae;g__Sediminibacterium;
Clostridium_sensu_stricto_13	0	0	0	0	0	0	0	0	0	0	0	0	0	0	0	0	0	0	0	0	0	0	0	0	0	0	0	0	0	0	0	0	0	0	0	0	0	k__Bacteria;p__Firmicutes;c__Clostridia;o__Clostridiales;f__Clostridiaceae_1;g__Clostridium_sensu_stricto_13;
Eubacterium	0	0	0	0	0	0	0	0	0	0	0	0	0	0	0	0	0	0	0	0	0	0	0	0	0	0	0	0	0	0	0	0	0	0	0	0	0	k__Bacteria;p__Firmicutes;c__Clostridia;o__Clostridiales;f__Eubacteriaceae;g__Eubacterium;
Ignatzschineria	0	0	0	0	0	0	0	0	0	0	0	0	0	0	0	0	0	0	0	0	0	0	0	0	0	0	0	0	0	0	0	0	0	0	0	0	0	k__Bacteria;p__Proteobacteria;c__Gammaproteobacteria;o__Xanthomonadales;f__Xanthomonadaceae;g__Ignatzschineria;
Cryptobacterium	0	0	0	0	0	0	0	0	0	0	0	0	0	0	0	0	0	0	0	0	0	0	0	0	0	0	0	0	0	0	0	0	0	0	0	0	0	k__Bacteria;p__Actinobacteria;c__Coriobacteriia;o__Coriobacteriales;f__Coriobacteriaceae;g__Cryptobacterium;
Ilumatobacter	0	0	0	0	0	0	0	0	0	0	0	0	0	0	0	0	0	0	0	0	0	0	0	0	0	0	0	0	0	0	0	0	0	0	0	0	0	k__Bacteria;p__Actinobacteria;c__Acidimicrobiia;o__Acidimicrobiales;f__Acidimicrobiaceae;g__Ilumatobacter;
Woodsholea	0	0	0	0	0	0	0	0	0	0	0	0	0	0	0	0	0	0	0	0	0	0	0	0	0	0	0	0	0	0	0	0	0	0	0	0	0	k__Bacteria;p__Proteobacteria;c__Alphaproteobacteria;o__Caulobacterales;f__Hyphomonadaceae;g__Woodsholea;
Zymomonas	0	0	0	0	0	0	0	0	0	0	0	0	0	0	0	0	0	0	0	0	0	0	0	0	0	0	0	0	0	0	0	0	0	0	0	0	0	k__Bacteria;p__Proteobacteria;c__Alphaproteobacteria;o__Sphingomonadales;f__Sphingomonadaceae;g__Zymomonas;
Algoriphagus	0	0	0	0	0	0	0	0	0	0	0	0	0	0	0	0	0	0	0	0	0	0	0	0	0	0	0	0	0	0	0	0	0	0	0	0	0	k__Bacteria;p__Bacteroidetes;c__Cytophagia;o__Cytophagales;f__Cyclobacteriaceae;g__Algoriphagus;
Pseudoramibacter	0	0	0	0	0	0	0	0	0	0	0	0	0	0	0	0	0	0	0	0	0	0	0	0	0	0	0	0	0	0	0	0	0	0	0	0	0	k__Bacteria;p__Firmicutes;c__Clostridia;o__Clostridiales;f__Eubacteriaceae;g__Pseudoramibacter;
Myroides	0	0	0	0	0	0	0	0	0	0	0	0	0	0	0	0	0	0	0	0	0	0	0	0	0	0	0	0	0	0	0	0	0	0	0	0	0	k__Bacteria;p__Bacteroidetes;c__Flavobacteriia;o__Flavobacteriales;f__Flavobacteriaceae;g__Myroides;
Butyricimonas	0	0	0	0	0	0	0	0	0	0	0	0	0	0	0	0	0	0	0	0	0	0	0	0	0	0	0	0	0	0	0	0	0	0	0	0	0	k__Bacteria;p__Bacteroidetes;c__Bacteroidia;o__Bacteroidales;f__Porphyromonadaceae;g__Butyricimonas;
Sutterella	0	0	0	0	0	0	0	0	0	0	0	0	0	0	0	0	0	0	0	0	0	0	0	0	0	0	0	0	0	0	0	0	0	0	0	0	0	k__Bacteria;p__Proteobacteria;c__Betaproteobacteria;o__Burkholderiales;f__Alcaligenaceae;g__Sutterella;
Gaiella	0	0	0	0	0	0	0	0	0	0	0	0	0	0	0	0	0	0	0	0	0	0	0	0	0	0	0	0	0	0	0	0	0	0	0	0	0	k__Bacteria;p__Actinobacteria;c__Thermoleophilia;o__Gaiellales;f__Gaiellaceae;g__Gaiella;
Caldinitratiruptor	0	0	0	0	0	0	0	0	0	0	0	0	0	0	0	0	0	0	0	0	0	0	0	0	0	0	0	0	0	0	0	0	0	0	0	0	0	k__Bacteria;p__Firmicutes;c__Clostridia;o__Clostridiales;f__Family_XVIII;g__Caldinitratiruptor;
Gemmatirosa	0	0	0	0	0	0	0	0	0	0	0	0	0	0	0	0	0	0	0	0	0	0	0	0	0	0	0	0	0	0	0	0	0	0	0	0	0	k__Bacteria;p__Gemmatimonadetes;c__unidentified_Gemmatimonadetes;o__Gemmatimonadales;f__Gemmatimonadaceae;g__Gemmatirosa;
Microvirga	0	0	0	0	0	0	0	0	0	0	0	0	0	0	0	0	0	0	0	0	0	0	0	0	0	0	0	0	0	0	0	0	0	0	0	0	0	k__Bacteria;p__Proteobacteria;c__Alphaproteobacteria;o__Rhizobiales;f__Methylobacteriaceae;g__Microvirga;
Arenimonas	0	0	0	0	0	0	0	0	0	0	0	0	0	0	0	0	0	0	0	0	0	0	0	0	0	0	0	0	0	0	0	0	0	0	0	0	0	k__Bacteria;p__Proteobacteria;c__Gammaproteobacteria;o__Xanthomonadales;f__Xanthomonadaceae;g__Arenimonas;
Exiguobacterium	0	0	0	0	0	0	0	0	0	0	0	0	0	0	0	0	0	0	0	0	0	0	0	0	0	0	0	0	0	0	0	0	0	0	0	0	0	k__Bacteria;p__Firmicutes;c__Bacilli;o__Bacillales;f__Family_XII;g__Exiguobacterium;
Phreatobacter	0	0	0	0	0	0	0	0	0	0	0	0	0	0	0	0	0	0	0	0	0	0	0	0	0	0	0	0	0	0	0	0	0	0	0	0	0	k__Bacteria;p__Proteobacteria;c__Alphaproteobacteria;o__Rhizobiales;f__unidentified_Rhizobiales;g__Phreatobacter;
Parabacteroides	0	0	0	0	0	0	0	0	0	0	0	0	0	0	0	0	0	0	0	0	0	0	0	0	0	0	0	0	0	0	0	0	0	0	0	0	0	k__Bacteria;p__Bacteroidetes;c__Bacteroidia;o__Bacteroidales;f__Porphyromonadaceae;g__Parabacteroides;
Acetobacteroides	0	0	0	0	0	0	0	0	0	0	0	0	0	0	0	0	0	0	0	0	0	0	0	0	0	0	0	0	0	0	0	0	0	0	0	0	0	k__Bacteria;p__Bacteroidetes;c__Bacteroidia;o__Bacteroidales;f__Rikenellaceae;g__Acetobacteroides;
Pseudopedobacter	0	0	0	0	0	0	0	0	0	0	0	0	0	0	0	0	0	0	0	0	0	0	0	0	0	0	0	0	0	0	0	0	0	0	0	0	0	k__Bacteria;p__Bacteroidetes;c__Sphingobacteriia;o__Sphingobacteriales;f__Sphingobacteriaceae;g__Pseudopedobacter;
Aneurinibacillus	0	0	0	0	0	0	0	0	0	0	0	0	0	0	0	0	0	0	0	0	0	0	0	0	0	0	0	0	0	0	0	0	0	0	0	0	0	k__Bacteria;p__Firmicutes;c__Bacilli;o__Bacillales;f__Paenibacillaceae;g__Aneurinibacillus;
Candidatus_Saccharimonas	0	0	0	0	0	0	0	0	0	0	0	0	0	0	0	0	0	0	0	0	0	0	0	0	0	0	0	0	0	0	0	0	0	0	0	0	0	k__Bacteria;p__Saccharibacteria;c__unidentified_Saccharibacteria;o__unidentified_Saccharibacteria;f__unidentified_Saccharibacteria;g__Candidatus_Saccharimonas;
Coxiella	0	0	0	0	0	0	0	0	0	0	0	0	0	0	0	0	0	0	0	0	0	0	0	0	0	0	0	0	0	0	0	0	0	0	0	0	0	k__Bacteria;p__Proteobacteria;c__Gammaproteobacteria;o__Legionellales;f__Coxiellaceae;g__Coxiella;
Moheibacter	0	0	0	0	0	0	0	0	0	0	0	0	0	0	0	0	0	0	0	0	0	0	0	0	0	0	0	0	0	0	0	0	0	0	0	0	0	k__Bacteria;p__Bacteroidetes;c__Flavobacteriia;o__Flavobacteriales;f__Flavobacteriaceae;g__Moheibacter;
Iamia	0	0	0	0	0	0	0	0	0	0	0	0	0	0	0	0	0	0	0	0	0	0	0	0	0	0	0	0	0	0	0	0	0	0	0	0	0	k__Bacteria;p__Actinobacteria;c__Acidimicrobiia;o__Acidimicrobiales;f__Iamiaceae;g__Iamia;
Nevskia	0	0	0	0	0	0	0	0	0	0	0	0	0	0	0	0	0	0	0	0	0	0	0	0	0	0	0	0	0	0	0	0	0	0	0	0	0	k__Bacteria;p__Proteobacteria;c__Gammaproteobacteria;o__Xanthomonadales;f__Nevskiaceae;g__Nevskia;
Facklamia	0	0	0	0	0	0	0	0	0	0	0	0	0	0	0	0	0	0	0	0	0	0	0	0	0	0	0	0	0	0	0	0	0	0	0	0	0	k__Bacteria;p__Firmicutes;c__Bacilli;o__Lactobacillales;f__Aerococcaceae;g__Facklamia;
Ruminiclostridium_1	0	0	0	0	0	0	0	0	0	0	0	0	0	0	0	0	0	0	0	0	0	0	0	0	0	0	0	0	0	0	0	0	0	0	0	0	0	k__Bacteria;p__Firmicutes;c__Clostridia;o__Clostridiales;f__Ruminococcaceae;g__Ruminiclostridium_1;
Vulcaniibacterium	0	0	0	0	0	0	0	0	0	0	0	0	0	0	0	0	0	0	0	0	0	0	0	0	0	0	0	0	0	0	0	0	0	0	0	0	0	k__Bacteria;p__Proteobacteria;c__Gammaproteobacteria;o__Xanthomonadales;f__Xanthomonadaceae;g__Vulcaniibacterium;
Camelimonas	0	0	0	0	0	0	0	0	0	0	0	0	0	0	0	0	0	0	0	0	0	0	0	0	0	0	0	0	0	0	0	0	0	0	0	0	0	k__Bacteria;p__Proteobacteria;c__Alphaproteobacteria;o__Rhizobiales;f__Beijerinckiaceae;g__Camelimonas;
Fretibacterium	0	0	0	0	0	0	0	0	0	0	0	0	0	0	0	0	0	0	0	0	0	0	0	0	0	0	0	0	0	0	0	0	0	0	0	0	0	k__Bacteria;p__Synergistetes;c__Synergistia;o__Synergistales;f__Synergistaceae;g__Fretibacterium;
Rudanella	0	0	0	0	0	0	0	0	0	0	0	0	0	0	0	0	0	0	0	0	0	0	0	0	0	0	0	0	0	0	0	0	0	0	0	0	0	k__Bacteria;p__Bacteroidetes;c__Cytophagia;o__Cytophagales;f__Cytophagaceae;g__Rudanella;
Nocardiopsis	0	0	0	0	0	0	0	0	0	0	0	0	0	0	0	0	0	0	0	0	0	0	0	0	0	0	0	0	0	0	0	0	0	0	0	0	0	k__Bacteria;p__Actinobacteria;c__unidentified_Actinobacteria;o__Streptosporangiales;f__Nocardiopsaceae;g__Nocardiopsis;
Geodermatophilus	0	0	0	0	0	0	0	0	0	0	0	0	0	0	0	0	0	0	0	0	0	0	0	0	0	0	0	0	0	0	0	0	0	0	0	0	0	k__Bacteria;p__Actinobacteria;c__unidentified_Actinobacteria;o__Frankiales;f__Geodermatophilaceae;g__Geodermatophilus;
Arcticibacter	0	0	0	0	0	0	0	0	0	0	0	0	0	0	0	0	0	0	0	0	0	0	0	0	0	0	0	0	0	0	0	0	0	0	0	0	0	k__Bacteria;p__Bacteroidetes;c__Sphingobacteriia;o__Sphingobacteriales;f__Sphingobacteriaceae;g__Arcticibacter;
Proteus	0	0	0	0	0	0	0	0	0	0	0	0	0	0	0	0	0	0	0	0	0	0	0	0	0	0	0	0	0	0	0	0	0	0	0	0	0	k__Bacteria;p__Proteobacteria;c__Gammaproteobacteria;o__Enterobacteriales;f__Enterobacteriaceae;g__Proteus;
Marinilactibacillus	0	0	0	0	0	0	0	0	0	0	0	0	0	0	0	0	0	0	0	0	0	0	0	0	0	0	0	0	0	0	0	0	0	0	0	0	0	k__Bacteria;p__Firmicutes;c__Bacilli;o__Lactobacillales;f__Carnobacteriaceae;g__Marinilactibacillus;
Selenomonas_4	0	0	0	0	0	0	0	0	0	0	0	0	0	0	0	0	0	0	0	0	0	0	0	0	0	0	0	0	0	0	0	0	0	0	0	0	0	k__Bacteria;p__Firmicutes;c__Negativicutes;o__Selenomonadales;f__Veillonellaceae;g__Selenomonas_4;
Nordella	0	0	0	0	0	0	0	0	0	0	0	0	0	0	0	0	0	0	0	0	0	0	0	0	0	0	0	0	0	0	0	0	0	0	0	0	0	k__Bacteria;p__Proteobacteria;c__Alphaproteobacteria;o__Rhizobiales;f__unidentified_Rhizobiales;g__Nordella;
Arsenicicoccus	0	0	0	0	0	0	0	0	0	0	0	0	0	0	0	0	0	0	0	0	0	0	0	0	0	0	0	0	0	0	0	0	0	0	0	0	0	k__Bacteria;p__Actinobacteria;c__unidentified_Actinobacteria;o__Micrococcales;f__Intrasporangiaceae;g__Arsenicicoccus;
Desulfobulbus	0	0	0	0	0	0	0	0	0	0	0	0	0	0	0	0	0	0	0	0	0	0	0	0	0	0	0	0	0	0	0	0	0	0	0	0	0	k__Bacteria;p__Proteobacteria;c__Deltaproteobacteria;o__Desulfobacterales;f__Desulfobulbaceae;g__Desulfobulbus;
Azospirillum	0	0	0	0	0	0	0	0	0	0	0	0	0	0	0	0	0	0	0	0	0	0	0	0	0	0	0	0	0	0	0	0	0	0	0	0	0	k__Bacteria;p__Proteobacteria;c__Alphaproteobacteria;o__Rhodospirillales;f__Rhodospirillaceae;g__Azospirillum;
Pseudarcicella	0	0	0	0	0	0	0	0	0	0	0	0	0	0	0	0	0	0	0	0	0	0	0	0	0	0	0	0	0	0	0	0	0	0	0	0	0	k__Bacteria;p__Bacteroidetes;c__Cytophagia;o__Cytophagales;f__Cytophagaceae;g__Pseudarcicella;
Amphiplicatus	0	0	0	0	0	0	0	0	0	0	0	0	0	0	0	0	0	0	0	0	0	0	0	0	0	0	0	0	0	0	0	0	0	0	0	0	0	k__Bacteria;p__Proteobacteria;c__Alphaproteobacteria;o__Parvularculales;f__Parvularculaceae;g__Amphiplicatus;
Legionella	0	0	0	0	0	0	0	0	0	0	0	0	0	0	0	0	0	0	0	0	0	0	0	0	0	0	0	0	0	0	0	0	0	0	0	0	0	k__Bacteria;p__Proteobacteria;c__Gammaproteobacteria;o__Legionellales;f__Legionellaceae;g__Legionella;
Actinomycetospora	0	0	0	0	0	0	0	0	0	0	0	0	0	0	0	0	0	0	0	0	0	0	0	0	0	0	0	0	0	0	0	0	0	0	0	0	0	k__Bacteria;p__Actinobacteria;c__unidentified_Actinobacteria;o__Pseudonocardiales;f__Pseudonocardiaceae;g__Actinomycetospora;
Vogesella	0	0	0	0	0	0	0	0	0	0	0	0	0	0	0	0	0	0	0	0	0	0	0	0	0	0	0	0	0	0	0	0	0	0	0	0	0	k__Bacteria;p__Proteobacteria;c__Betaproteobacteria;o__Neisseriales;f__Neisseriaceae;g__Vogesella;
Gluconobacter	0	0	0	0	0	0	0	0	0	0	0	0	0	0	0	0	0	0	0	0	0	0	0	0	0	0	0	0	0	0	0	0	0	0	0	0	0	k__Bacteria;p__Proteobacteria;c__Alphaproteobacteria;o__Rhodospirillales;f__Acetobacteraceae;g__Gluconobacter;
Peptoclostridium	0	0	0	0	0	0	0	0	0	0	0	0	0	0	0	0	0	0	0	0	0	0	0	0	0	0	0	0	0	0	0	0	0	0	0	0	0	k__Bacteria;p__Firmicutes;c__Clostridia;o__Clostridiales;f__Peptostreptococcaceae;g__Peptoclostridium;
Azospira	0	0	0	0	0	0	0	0	0	0	0	0	0	0	0	0	0	0	0	0	0	0	0	0	0	0	0	0	0	0	0	0	0	0	0	0	0	k__Bacteria;p__Proteobacteria;c__Betaproteobacteria;o__Rhodocyclales;f__Rhodocyclaceae;g__Azospira;
[truncated: 6 more columns]
