# Supplementary material for: Comparison of Blood Bacterial Communities in Periodontal Health and Periodontal Disease
Source: Front Cell Infect Microbiol. 2021 Jan 5;10:577485. doi: 10.3389/fcimb.2020.577485 (PMC7813997; doi:10.3389/fcimb.2020.577485)
Supplement: Supplementary Table 7 — Relative Abundance (Species). [file Table_7.xlsx]

## Sheet: otu_table.s.relative
MolYsis (Species)
Taxonomy	WB.87.C	WB.90.C	WB.93.C	WB.94.C	WB.95.C	WB.96.C	WB.105.C	WB.108.C	WB.110.C	WB.111.C	WB.112.P	WB.113.C	WB.114.C	WB.115.C	WB.117.C	WB.118.C	WB.119.C	WB.121.C	WB.122.C	WB.123.C	WB.84.P	WB.88.P	WB.89.P	WB.91.P	WB.92.P	WB.97.P	WB.98.P	WB.99.P	WB.100.P	WB.101.P	WB.102.P	WB.103.P	WB.104.P	WB.106.P	WB.107.P	WB.109.P	Average	Tax_detail
Others (SMG)	0.407432	0.409002	0.729896	0.544544	0.471539	0.852022	0.410584	0.499521	0.829957	0.567803	0.518768	0.464299	0.577862	0.451486	0.531462	0.897346	0.839306	0.468818	0.573075	0.555894	0.491883	0.49127	0.461459	0.57258	0.394995	0.498682	0.678106	0.420212	0.651652	0.459748	0.345185	0.55612	0.562499	0.627511	0.474326	0.824643	0.558652	Others (SMG)
Staphylococcus_epidermidis	0.111174	0.396362	0.101783	0.121986	0.197455	0.0570503	0.312932	0.161479	0.0989963	0.244478	0.272428	0.199477	0.167698	0.336299	0.199456	0.035717	0.0105107	0.300076	0.132433	0.204888	0.299969	0.348735	0.265769	0.133304	0.331124	0.130098	0.108151	0.168246	0.0950696	0.28963	0.41904	0.261057	0.227653	0.19639	0.286769	0.0322421	0.201553	k__Bacteria;p__Firmicutes;c__Bacilli;o__Bacillales;f__Staphylococcaceae;g__Staphylococcus;s__Staphylococcus_epidermidis;
Corynebacterium_tuberculostearicum	0.0216238	0.0445494	0.0208815	0.0544146	0.0702398	0.00347487	0.0119523	0.10628	0.0143406	0.0339849	0.0158467	0.0313599	0.0223769	0.0403215	0.0193861	0.0140931	0.00145235	0.0106936	0.0131464	0.057201	0.0603316	0.0343722	0.0589653	0.0692501	0.0445924	0.0755973	0.00475509	0.00392672	0.0153949	0.064538	0.0456145	0.0276914	0.0103063	0.019526	0.0164707	0.0042387	0.0323108	k__Bacteria;p__Actinobacteria;c__unidentified_Actinobacteria;o__Corynebacteriales;f__Corynebacteriaceae;g__Corynebacterium_1;s__Corynebacterium_tuberculostearicum;
Haemophilus_parainfluenzae	4.30325e-05	0.00124794	0.0146418	0.218842	0.00128022	0.0062182	0.0633976	0.011522	0.00311986	0.000968231	0.00805784	0.0540596	0.00346412	0.00744462	0.00146311	0.0032382	0.0993943	0.0116726	0.0212365	0.000398051	0.00578787	0.0015169	0.0495734	0.0825041	0.00226996	0.0120814	0.0823857	0.00406657	0.0549095	0.00216238	0.00304455	0.000720794	0.0544361	0.00742311	0.0181059	0.0652803	0.0271661	k__Bacteria;p__Proteobacteria;c__Gammaproteobacteria;o__Pasteurellales;f__Pasteurellaceae;g__Haemophilus;s__Haemophilus_parainfluenzae;
Acinetobacter_junii	0.00857423	0.00713264	0.00795025	0.00360397	0.0162663	0.00257119	0.0168472	0.000322744	0.00202253	0.000204404	0.000204404	0.000968231	0.000548664	0.000677762	0.000430325	0.00694975	0.000580939	0.0182673	0.0144051	0.00981141	8.6065e-05	0.000182888	0.00068852	0.000720794	0.00150614	0.064581	0.00336729	0.177896	0.0352329	0.0584166	0.00236679	0.00120491	0.00195798	0.0220434	0.028778	0.000441083	0.0143836	k__Bacteria;p__Proteobacteria;c__Gammaproteobacteria;o__Pseudomonadales;f__Moraxellaceae;g__Acinetobacter;s__Acinetobacter_junii;
Corynebacterium_glucuronolyticum	0.331501	0	5.37906e-05	4.30325e-05	0.0144266	0.000107581	0	0	0	0.000129098	0	0	0	0	0	0	0	0	0	0	0.00104354	0	0	0	2.15163e-05	0.000129098	0.000139856	9.68231e-05	0	0	0	5.37906e-05	0	0	0	0	0.0096596	k__Bacteria;p__Actinobacteria;c__unidentified_Actinobacteria;o__Corynebacteriales;f__Corynebacteriaceae;g__Corynebacterium;s__Corynebacterium_glucuronolyticum;
Lactobacillus_helveticus	0.0066808	0.00857423	0.00140931	0.00617516	0.0374813	0.00471206	0.0107474	0.00759524	0.00246361	0.0201069	0.00799329	0.0171054	0.0317472	0.0081439	0.00034426	0.00195798	0.000301228	0.000484116	0.0017213	0.00855271	0.0101987	0.00761675	0.0128775	0.00155993	0.00116188	0.00339957	0.00939184	0.0220219	0.00569105	0.000763827	0.000968231	0.00694975	0.00892924	0.0099943	0.0131142	0.00233451	0.00836863	k__Bacteria;p__Firmicutes;c__Bacilli;o__Lactobacillales;f__Lactobacillaceae;g__Lactobacillus;s__Lactobacillus_helveticus;
Halomonas_nitritophilus	0.0203113	0.000182888	0.000580939	0.000613213	0.0209353	0.00243134	0.0300044	0.0267447	0.00471206	0.0039052	0.0262498	0.00556195	0.00832679	0.0313599	0.0110056	0.000968231	0.000623971	0.00797177	0.00894	0.00489495	0.00160296	0.000613213	0.00207632	0.000398051	0.0265188	0.0128344	0.0017213	0.00183964	0.0228933	0.000333502	0.000548664	0.000753069	0.00181812	0.00117264	0.00109733	0.00128022	0.00816183	k__Bacteria;p__Proteobacteria;c__Gammaproteobacteria;o__Oceanospirillales;f__Halomonadaceae;g__Halomonas;s__Halomonas_nitritophilus;
Micrococcus_luteus	1.07581e-05	0.00475509	0.000311986	0.00385141	0.0242811	0.000903683	0.0239261	0.00129098	0.00101126	0.0346519	0.0106183	0.0169118	0.00204404	0.000935957	0.00034426	0.00565877	0.000225921	0.00107581	0.0576743	0.000290469	2.15163e-05	0.000279711	0.00154917	8.6065e-05	0.00034426	0.0078104	0.0116188	0.00051639	0.000441083	0.000419567	0.00683141	0.0212473	0.000978989	0.000753069	0.00414188	0.00122643	0.00691777	k__Bacteria;p__Actinobacteria;c__unidentified_Actinobacteria;o__Micrococcales;f__Micrococcaceae;g__Micrococcus;s__Micrococcus_luteus;
Geobacillus_thermoleovorans	0.00428173	0.0170731	0.000914441	0.000129098	0.000333502	0.00171054	0.000892924	0.0225813	0.00154917	0.00648715	0.0180199	0.0033135	0.0155885	0.011565	0.0140931	0.00115112	0.000731553	0.00356094	0.00140931	0.0151905	6.45488e-05	0.00785343	0.00933805	0.0272826	0.000817618	0.000258195	0.00248513	0.000742311	0.0026465	0.00395899	0.00813314	0.00472282	0.00157069	0.00477661	0.0133078	0.00143083	0.00638794	k__Bacteria;p__Firmicutes;c__Bacilli;o__Bacillales;f__Bacillaceae;g__Geobacillus;s__Geobacillus_thermoleovorans;
Actinomyces_odontolyticus	1.07581e-05	0.00223769	0.034781	0.00396975	0.00017213	0.00221617	0.00100051	0.000301228	0.000258195	8.6065e-05	0.000731553	0.000623971	0.000365776	0.000408809	0.0193324	0.00128022	0.0149323	0.00261422	0.0392994	0.00959625	0.00143083	0.000204404	0.000236679	0.000193646	0.000398051	0.000892924	0.00442159	0.00528224	0.0402461	0.000871408	0.0135337	0.000215163	0.00162448	0.000613213	0.00899379	0.00785343	0.00614528	k__Bacteria;p__Actinobacteria;c__unidentified_Actinobacteria;o__Actinomycetales;f__Actinomycetaceae;g__Actinomyces;s__Actinomyces_odontolyticus;
Kocuria_rhizophila	0.00658397	0.000462599	0.000441083	0.000322744	0.00867105	0.00396975	0.00717567	0.0115327	0.000290469	0.000559423	0.014545	0.00188267	0.000817618	0.000355018	0.0435381	0.00245285	0.000731553	0.000989748	0.00161372	0.00532527	6.45488e-05	0.0106505	0.0289178	0.000537906	0.0248728	0.0103278	0.000742311	0.000462599	0.0124579	0.00524997	0.000333502	0.00213011	0.00200101	0.00504556	0.000247437	0.000742311	0.00602903	k__Bacteria;p__Actinobacteria;c__unidentified_Actinobacteria;o__Micrococcales;f__Micrococcaceae;g__Kocuria;s__Kocuria_rhizophila;
Bacillus_halodurans	0.00182888	0.000623971	0.00034426	0.00565877	0.0216131	0.00193646	0.00203329	0.0251417	0.00177509	0.00783192	0.00804708	0.0269276	0.0127591	0.00210859	0.000667004	0.00306607	8.6065e-05	0.0013878	0.0041096	0.0130388	3.22744e-05	0.0043678	0.0068852	0.000290469	0.00157069	0.00584166	0.0105968	0.000656246	0.00518542	0.000322744	0.011296	0.000699278	0.00607834	0.00115112	0.00119415	0.00176433	0.00552549	k__Bacteria;p__Firmicutes;c__Bacilli;o__Bacillales;f__Bacillaceae;g__Bacillus;s__Bacillus_halodurans;
Fusobacterium_periodonticum	3.22744e-05	0.0010543	0.00774585	0.000182888	0.000129098	0.0153626	0.000419567	0.000935957	0.000161372	0.000182888	0.00140931	0.00086065	0.0636236	0.00034426	0.000215163	0.000645488	0.000462599	0.000129098	6.45488e-05	0.000204404	0.0103601	0.0154379	0.0114789	0.000161372	0.0187944	0.00224845	0.00812238	0.000290469	0.000387293	0.0140824	0.00111885	9.68231e-05	0.0157929	0.00115112	0.000129098	0.00114036	0.00541552	k__Bacteria;p__Fusobacteria;c__Fusobacteriia;o__Fusobacteriales;f__Fusobacteriaceae;g__Fusobacterium;s__Fusobacterium_periodonticum;
Haemophilus_haemolyticus	0	0.000107581	0.00342108	0.000236679	0.000118339	0.0070896	0.00150614	0.00188267	0.00129098	0.000871408	0.00699278	0.0719181	0.00202253	0.00178585	0.000225921	0.00086065	0.00934881	0.000204404	0.00835906	0.00299076	0	0.000193646	0.00977914	0.000139856	0.000311986	0.0135014	0.000451841	0.000365776	0.00409885	0.000322744	2.15163e-05	0	0.000193646	7.53069e-05	7.53069e-05	0.0324357	0.00508889	k__Bacteria;p__Proteobacteria;c__Gammaproteobacteria;o__Pasteurellales;f__Pasteurellaceae;g__Haemophilus;s__Haemophilus_haemolyticus;
Corynebacterium_kroppenstedtii	0.00909062	0.000580939	0.00051639	0.000365776	0.000537906	0.00379762	0.000548664	0.00086065	0.00488419	0.0133616	0.0010543	0.00826224	0.0230439	0.00128022	4.30325e-05	0.000161372	0.000150614	3.22744e-05	0.000204404	0.000225921	5.37906e-05	0.000107581	0.000355018	0.00856347	0.0199133	0.00100051	0.00150614	0.0283046	0.000182888	0.0148032	0.000247437	0.000333502	0.000204404	0.00591697	0.000301228	0.000796101	0.00421091	k__Bacteria;p__Actinobacteria;c__unidentified_Actinobacteria;o__Corynebacteriales;f__Corynebacteriaceae;g__Corynebacterium_1;s__Corynebacterium_kroppenstedtii;
Bacillus_coagulans	0	3.22744e-05	0.000290469	0.00744462	0.00620744	0.00158144	0.00130173	0.00118339	0.00316289	0.00111885	0.0131787	0.00674534	0.00190419	0.0187299	0.00901531	0.000946715	0.000473358	0.000322744	0.000204404	1.07581e-05	0	0.000559423	0.000355018	0.00051639	0.00878939	0.010984	0.000839134	0.00343184	0.000473358	0.000355018	0.0180737	0.00658397	0.0100158	0.000570181	0.00109733	0.000839134	0.00381495	k__Bacteria;p__Firmicutes;c__Bacilli;o__Bacillales;f__Bacillaceae;g__Bacillus;s__Bacillus_coagulans;
Prevotella_melaninogenica	0	7.53069e-05	0.0312739	7.53069e-05	8.6065e-05	0.00356094	0.00256043	8.6065e-05	2.15163e-05	1.07581e-05	0.000398051	0.000193646	3.22744e-05	6.45488e-05	0.0244747	0.000441083	0.0136198	0.00300152	0.023883	4.30325e-05	0	0.0205265	0.000204404	0.000193646	0.000161372	0.00173206	0.000139856	0.00034426	5.37906e-05	0.000225921	1.07581e-05	2.15163e-05	0.000322744	3.22744e-05	6.45488e-05	0.00728325	0.00375608	k__Bacteria;p__Bacteroidetes;c__Bacteroidia;o__Bacteroidales;f__Prevotellaceae;g__Prevotella_7;s__Prevotella_melaninogenica;
Prevotella_sp._oral_clone_IDR-CEC-0093	0.00958549	0.0169118	1.07581e-05	1.07581e-05	2.15163e-05	0.00258195	0.000118339	7.53069e-05	4.30325e-05	3.22744e-05	0.000656246	0.000182888	0.0100696	4.30325e-05	0.0610201	0.00153841	0.000279711	0.0053683	0.0122858	9.68231e-05	3.22744e-05	0.00051639	0.000236679	0.000118339	5.37906e-05	0.00448614	0.000279711	3.22744e-05	0.00555119	1.07581e-05	2.15163e-05	2.15163e-05	0.00051639	0.00017213	3.22744e-05	2.15163e-05	0.00369542	k__Bacteria;p__Bacteroidetes;c__Bacteroidia;o__Bacteroidales;f__Prevotellaceae;g__Prevotella_2;s__Prevotella_sp._oral_clone_IDR-CEC-0093;
Acinetobacter_lwoffii	3.22744e-05	0.000150614	0	0	2.15163e-05	0.00144159	0.000279711	0.000129098	5.37906e-05	6.45488e-05	0.00611062	0.000268953	0.000139856	0.000129098	0.000667004	5.37906e-05	0	0.0777812	0.0137059	0.000387293	5.37906e-05	0.0191495	0.00034426	0.000139856	0	0.000441083	1.07581e-05	0	3.22744e-05	9.68231e-05	5.37906e-05	5.37906e-05	0.010586	0.000107581	8.6065e-05	6.45488e-05	0.00368436	k__Bacteria;p__Proteobacteria;c__Gammaproteobacteria;o__Pseudomonadales;f__Moraxellaceae;g__Acinetobacter;s__Acinetobacter_lwoffii;
Prevotella_corporis	0	0	0.00443235	0.000118339	0.000129098	0.00611062	0.000559423	0.0315428	0.000311986	0.00990823	0.000623971	0.0274225	0.000387293	0.000387293	3.22744e-05	8.6065e-05	0.000247437	6.45488e-05	0.000398051	0.00770282	0	2.15163e-05	0.000161372	3.22744e-05	0.000279711	0.000462599	9.68231e-05	9.68231e-05	0.000398051	0.000161372	0.0141039	0.00017213	0.000247437	0.000129098	0.0167827	0.000311986	0.0034423	k__Bacteria;p__Bacteroidetes;c__Bacteroidia;o__Bacteroidales;f__Prevotellaceae;g__Prevotella_6;s__Prevotella_corporis;
Aeribacillus_pallidus	4.30325e-05	0.00706809	0.000699278	0.000387293	0.000387293	0.000623971	0.00577711	0.000236679	0.000215163	0.00206556	0.000408809	0.00126946	0.000677762	0.000785343	0.000182888	0.00123718	0.000408809	0.00856347	0.00775661	0.00607834	0.00446462	0.000623971	0.0064226	0.0139103	0.00724022	0.0101879	0.00101126	0.00658397	0.000441083	0.000290469	0.00740159	0.00051639	0.000645488	0.00339957	0.0154379	0.000333502	0.00343842	k__Bacteria;p__Firmicutes;c__Bacilli;o__Bacillales;f__Bacillaceae;g__Aeribacillus;s__Aeribacillus_pallidus;
Prevotella_pallens	0	0	0.000161372	0.000290469	0.000225921	0.000720794	0.000322744	6.45488e-05	5.37906e-05	0	3.22744e-05	0.000301228	0	0	6.45488e-05	0.00017213	0	0.00909062	0.000623971	2.15163e-05	0	3.22744e-05	0.000161372	0	0.0133616	0.0864415	0.000311986	0.000451841	0.000139856	2.15163e-05	0.0072187	3.22744e-05	0.000129098	4.30325e-05	3.22744e-05	0	0.00334787	k__Bacteria;p__Bacteroidetes;c__Bacteroidia;o__Bacteroidales;f__Prevotellaceae;g__Prevotella;s__Prevotella_pallens;
Aggregatibacter_aphrophilus	0	5.37906e-05	0.00511011	0.000107581	3.22744e-05	0.000129098	0.0110163	0.0531774	0.000903683	0.000527148	0.00235603	0.00271105	0.00158144	0.00946715	2.15163e-05	2.15163e-05	0.000182888	3.22744e-05	4.30325e-05	0	0	3.22744e-05	4.30325e-05	0.000204404	0.00145235	0.00034426	0.0076813	0.000430325	0.00160296	0.000376534	0.00692823	0.000118339	0.000365776	0.00606758	0.00649791	0.00086065	0.00334667	k__Bacteria;p__Proteobacteria;c__Gammaproteobacteria;o__Pasteurellales;f__Pasteurellaceae;g__Aggregatibacter;s__Aggregatibacter_aphrophilus;
Corynebacterium_appendicis	9.68231e-05	0.000150614	8.6065e-05	8.6065e-05	0.000150614	0.000473358	0.000193646	0.00017213	0	0	0.000215163	2.15163e-05	0	0.000268953	0.000150614	0.00160296	0.000161372	0.0106828	0.000258195	4.30325e-05	0.0161372	0.000279711	0.000322744	0.0234742	0.0366207	0.000290469	0.00017213	0.000623971	0.000268953	5.37906e-05	7.53069e-05	8.6065e-05	0.000279711	9.68231e-05	0.0165568	0	0.00305979	k__Bacteria;p__Actinobacteria;c__unidentified_Actinobacteria;o__Corynebacteriales;f__Corynebacteriaceae;g__Corynebacterium_1;s__Corynebacterium_appendicis;
Rothia_dentocariosa	1.07581e-05	2.15163e-05	0.0138565	0.00051639	0.0135768	0.000634729	0.00068852	0.000225921	0.00280787	0.000236679	0.000301228	0.000129098	0.000193646	8.6065e-05	5.37906e-05	0	0	0.000236679	0.000290469	0.00757372	1.07581e-05	7.53069e-05	3.22744e-05	0	0.0181274	0.000602455	0.000570181	0.000365776	0.00051639	0.0110378	0.0186008	0.000451841	0.012544	0.000484116	0.000322744	0.000849892	0.00294534	k__Bacteria;p__Actinobacteria;c__unidentified_Actinobacteria;o__Micrococcales;f__Micrococcaceae;g__Rothia;s__Rothia_dentocariosa;
Prevotella_nigrescens	0.00672383	3.22744e-05	0	0	0	0.000118339	0.000333502	0.0152443	3.22744e-05	5.37906e-05	0.000215163	0.000150614	9.68231e-05	3.22744e-05	9.68231e-05	3.22744e-05	0	6.45488e-05	3.22744e-05	1.07581e-05	2.15163e-05	0.00017213	0.00853119	5.37906e-05	9.68231e-05	3.22744e-05	3.22744e-05	0	0.000290469	8.6065e-05	0.000139856	0.000161372	0.0581369	0.0075522	0.000225921	3.22744e-05	0.00274541	k__Bacteria;p__Bacteroidetes;c__Bacteroidia;o__Bacteroidales;f__Prevotellaceae;g__Prevotella;s__Prevotella_nigrescens;
Prevotella_oris	0	0	4.30325e-05	0.000161372	7.53069e-05	0.000365776	0.000215163	0.000150614	0.000182888	0.000161372	0.0214625	0.000268953	0.000139856	0.0270029	0.000161372	0	5.37906e-05	0.000118339	0	0	0	8.6065e-05	0	8.6065e-05	0.0127807	9.68231e-05	4.30325e-05	0.000236679	0.000225921	9.68231e-05	0.0224737	0.00641184	0.00051639	9.68231e-05	0.000258195	8.6065e-05	0.00261273	k__Bacteria;p__Bacteroidetes;c__Bacteroidia;o__Bacteroidales;f__Prevotellaceae;g__Prevotella;s__Prevotella_oris;
Escherichia_coli	0.00443235	0.00440007	0.00136628	7.53069e-05	0.000161372	0.00017213	0.00735856	6.45488e-05	3.22744e-05	0.00122643	0.000107581	0.000365776	0.000419567	0.000204404	2.15163e-05	0.000129098	0.000193646	0	0.000247437	0.000107581	0.00945639	0.000301228	0.00651942	0.000387293	0.000129098	0.000430325	0.00816542	0.000182888	0.000473358	0.00606758	0.000408809	0.000462599	0.000591697	0.00485191	0.0206986	0.000258195	0.0022353	k__Bacteria;p__Proteobacteria;c__Gammaproteobacteria;o__Enterobacteriales;f__Enterobacteriaceae;g__Escherichia-Shigella;s__Escherichia_coli;
Moraxella_osloensis	0.000118339	3.22744e-05	0.0026465	0.000247437	5.37906e-05	0.000634729	0	0.000107581	0.0054974	9.68231e-05	0.000720794	0.000215163	0.000322744	0.000215163	0.0151367	0.000365776	0.000268953	0.000473358	0.000365776	0.0099943	0.0275623	0.000182888	2.15163e-05	0.00108657	4.30325e-05	0.000118339	0.000225921	0.00584166	0	7.53069e-05	0.000118339	0	0.000322744	5.37906e-05	3.22744e-05	0.000290469	0.00204135	k__Bacteria;p__Proteobacteria;c__Gammaproteobacteria;o__Pseudomonadales;f__Moraxellaceae;g__Enhydrobacter;s__Moraxella_osloensis;
Methylobacterium_populi	0	0.0117694	0.000225921	0.000268953	0.000129098	0.000957473	0.000161372	0	0	0	0.000731553	0.000279711	0.000236679	0.000322744	0.00901531	0.000484116	0.000408809	0.000247437	0.000150614	2.15163e-05	1.07581e-05	0.000473358	0.000322744	0.00034426	0.000107581	0.00990823	0.000742311	0.0253892	0	0	0	0	0.000408809	0.000139856	0.000161372	0	0.00176164	k__Bacteria;p__Proteobacteria;c__Alphaproteobacteria;o__Rhizobiales;f__Methylobacteriaceae;g__Methylobacterium;s__Methylobacterium_populi;
Lactococcus_lactis	3.22744e-05	0.00144159	0	0	0.000236679	0.000494874	0.000473358	0.000322744	8.6065e-05	0.000570181	0.0123181	0.000258195	0.000247437	0.000225921	0.000301228	0	2.15163e-05	0.000279711	0	0	2.15163e-05	0.0079395	0.000279711	0.00466903	8.6065e-05	0	1.07581e-05	7.53069e-05	0.00620744	0.000236679	0.000215163	0.0189343	0.000871408	0.000322744	0.000494874	0.000107581	0.00160505	k__Bacteria;p__Firmicutes;c__Bacilli;o__Lactobacillales;f__Streptococcaceae;g__Lactococcus;s__Lactococcus_lactis;
Acinetobacter_ursingii	0.000107581	0.000258195	3.22744e-05	5.37906e-05	6.45488e-05	8.6065e-05	4.30325e-05	0.000118339	0.000150614	0.000129098	0.000279711	0.000484116	0.00589545	0.000150614	0	3.22744e-05	0	0.00034426	0.00772433	0.017256	0.012899	0	3.22744e-05	0	4.30325e-05	0.000258195	0.0103386	0.000139856	0	0	0	0	0	0.000537906	0	0.000193646	0.00160147	k__Bacteria;p__Proteobacteria;c__Gammaproteobacteria;o__Pseudomonadales;f__Moraxellaceae;g__Acinetobacter;s__Acinetobacter_ursingii;
Nesterenkonia_flava	1.07581e-05	0.000107581	9.68231e-05	0.000107581	0.000279711	0.000731553	0.00710036	0.000193646	0.000204404	0.000322744	0.011565	0.000806859	0.000537906	0.00278635	0.000462599	0.00118339	0.000107581	0.00137704	0.000968231	0.0133401	0	0.000258195	0.000107581	0.000107581	0.00398051	0.00389444	0.000311986	0.000258195	9.68231e-05	9.68231e-05	0.000107581	0.00446462	0.000559423	0.000236679	0.000161372	0.000118339	0.00158473	k__Bacteria;p__Actinobacteria;c__unidentified_Actinobacteria;o__Micrococcales;f__Micrococcaceae;g__Nesterenkonia;s__Nesterenkonia_flava;
Anaerococcus_vaginalis	5.37906e-05	7.53069e-05	0	0	7.53069e-05	2.15163e-05	0.000182888	0	0	6.45488e-05	2.15163e-05	1.07581e-05	0	6.45488e-05	6.45488e-05	0.00187191	6.45488e-05	0.00467978	0.000107581	4.30325e-05	0.00994051	7.53069e-05	0.000107581	0.0105752	0	1.07581e-05	0	3.22744e-05	6.45488e-05	5.37906e-05	7.53069e-05	0.0216453	0.000193646	7.53069e-05	0.000182888	0	0.00140095	k__Bacteria;p__Firmicutes;c__Clostridia;o__Clostridiales;f__Family_XI;g__Anaerococcus;s__Anaerococcus_vaginalis;
Actinomyces_graevenitzii	0	0.000129098	0.00249589	1.07581e-05	0.000247437	4.30325e-05	0.0011296	0.000150614	0.000107581	0.01121	0.000268953	0.000559423	0.000193646	0.000139856	1.07581e-05	0.000107581	0.000268953	6.45488e-05	0.00494874	0	0	0.00204404	0.0153303	0.000118339	0	0.000247437	1.07581e-05	6.45488e-05	4.30325e-05	0.00213011	2.15163e-05	0.000236679	3.22744e-05	3.22744e-05	7.53069e-05	0.000193646	0.00118519	k__Bacteria;p__Actinobacteria;c__unidentified_Actinobacteria;o__Actinomycetales;f__Actinomycetaceae;g__Actinomyces;s__Actinomyces_graevenitzii;
Streptococcus_intermedius	0	0	0.00123718	0.00174282	0.000139856	0.000720794	0	0.000204404	0.000161372	0.000129098	0.00104354	0.000290469	0.000225921	0.00948867	0.014233	0.000441083	0.000441083	0.000215163	0	0	0	0.000247437	0	0.000322744	9.68231e-05	0.000279711	0.000247437	0.00941336	0	0	2.15163e-05	0	0.000441083	0	0.000365776	0.000236679	0.00117742	k__Bacteria;p__Firmicutes;c__Bacilli;o__Lactobacillales;f__Streptococcaceae;g__Streptococcus;s__Streptococcus_intermedius;
Pantoea_ananatis	0	4.30325e-05	7.53069e-05	0.00199025	7.53069e-05	0.000451841	0.00291545	9.68231e-05	0.000118339	8.6065e-05	0.00308758	0.000247437	0.000225921	4.30325e-05	0.000247437	1.07581e-05	0	0.0181705	0.00123718	0.00628275	0	0.000193646	0.000193646	0	5.37906e-05	0.000107581	0.000150614	6.45488e-05	0.000118339	0.00244209	9.68231e-05	0.000107581	0.000419567	0.000473358	5.37906e-05	0.000107581	0.00111078	k__Bacteria;p__Proteobacteria;c__Gammaproteobacteria;o__Enterobacteriales;f__Enterobacteriaceae;g__Pantoea;s__Pantoea_ananatis;
Brachybacterium_paraconglomeratum	0	6.45488e-05	0.00104354	0.0104784	0.000150614	0.000247437	8.6065e-05	0	9.68231e-05	1.07581e-05	1.07581e-05	0.000150614	0	8.6065e-05	3.22744e-05	0.000903683	6.45488e-05	1.07581e-05	0.00260347	0	0	9.68231e-05	0.00899379	0.000182888	0.000129098	0.000505632	0.000204404	0.0130496	0	0	8.6065e-05	0	0	0	8.6065e-05	0.000150614	0.00109793	k__Bacteria;p__Actinobacteria;c__unidentified_Actinobacteria;o__Micrococcales;f__Dermabacteraceae;g__Brachybacterium;s__Brachybacterium_paraconglomeratum;
Corynebacterium_durum	0	9.68231e-05	7.53069e-05	0.000118339	0.00664852	5.37906e-05	0.000301228	0.000322744	0.00226996	0.000182888	0.000129098	0.000355018	0.000322744	0.00474433	0	0	7.53069e-05	0	0	2.15163e-05	0	0	0	0.000161372	0.000150614	9.68231e-05	0.000215163	0.00017213	0.00974686	0.00017213	0.00017213	0.000258195	0.00017213	0.0113283	0.000279711	0.000311986	0.00108209	k__Bacteria;p__Actinobacteria;c__unidentified_Actinobacteria;o__Corynebacteriales;f__Corynebacteriaceae;g__Corynebacterium;s__Corynebacterium_durum;
Alloprevotella_tannerae	0	5.37906e-05	0	0	3.22744e-05	0	0.0101987	4.30325e-05	4.30325e-05	0.0118339	8.6065e-05	0.000215163	7.53069e-05	3.22744e-05	1.07581e-05	3.22744e-05	0.000193646	0	3.22744e-05	0	0	3.22744e-05	0.00907986	4.30325e-05	0	3.22744e-05	0	0	4.30325e-05	5.37906e-05	2.15163e-05	0.000129098	5.37906e-05	0.00366852	0.000118339	5.37906e-05	0.00100588	k__Bacteria;p__Bacteroidetes;c__Bacteroidia;o__Bacteroidales;f__Prevotellaceae;g__Alloprevotella;s__Alloprevotella_tannerae;
Propionibacterium_granulosum	1.07581e-05	0.000268953	4.30325e-05	5.37906e-05	0.00131249	8.6065e-05	0.00034426	0.000441083	0.00106505	0.000355018	0.000849892	0.0079395	0.0114897	0.000355018	4.30325e-05	0.00034426	1.07581e-05	0.00122643	0.000484116	0.00169978	0	4.30325e-05	0.000387293	0.00134477	2.15163e-05	0.00148462	0.000527148	4.30325e-05	3.22744e-05	0.000118339	4.30325e-05	2.15163e-05	5.37906e-05	0.0021839	3.22744e-05	0.000279711	0.000973311	k__Bacteria;p__Actinobacteria;c__unidentified_Actinobacteria;o__Propionibacteriales;f__Propionibacteriaceae;g__Propionibacterium;s__Propionibacterium_granulosum;
Leptotrichia_sp._oral_clone_FP036	0	3.22744e-05	8.6065e-05	1.07581e-05	6.45488e-05	4.30325e-05	0.000150614	4.30325e-05	0	2.15163e-05	1.07581e-05	3.22744e-05	4.30325e-05	0	0	0	0	1.07581e-05	0.00466903	4.30325e-05	0	0	0.000365776	0	0.0110916	9.68231e-05	0.000150614	8.6065e-05	0.000161372	0.000129098	5.37906e-05	0.00341033	7.53069e-05	0.00971459	8.6065e-05	0.000408809	0.000863638	k__Bacteria;p__Fusobacteria;c__Fusobacteriia;o__Fusobacteriales;f__Leptotrichiaceae;g__Leptotrichia;s__Leptotrichia_sp._oral_clone_FP036;
Peptoniphilus_sp._BV3AC2	0.00551892	0	1.07581e-05	0	0	3.22744e-05	1.07581e-05	0.000193646	0.000225921	0.000182888	0.000559423	0.000591697	0.00051639	0.0113283	4.30325e-05	0	0.000129098	0.00445386	9.68231e-05	6.45488e-05	0.00523921	2.15163e-05	0	0.000268953	0	0	0	0.000279711	0	1.07581e-05	0	0	4.30325e-05	0	0.000355018	0.000387293	0.000848995	k__Bacteria;p__Firmicutes;c__Clostridia;o__Clostridiales;f__Family_XI;g__Peptoniphilus;s__Peptoniphilus_sp._BV3AC2;
Tepidimonas_taiwanensis	0	0	0.000107581	0.000150614	0.0203866	0.000279711	0	0	0	0.000182888	0	1.07581e-05	0	5.37906e-05	0	0	5.37906e-05	0	0	0	0	0	0	5.37906e-05	0.000129098	0.000301228	0.000236679	0.00809011	0	0	0	0.000107581	0	0	7.53069e-05	0	0.000839433	k__Bacteria;p__Proteobacteria;c__Betaproteobacteria;o__Burkholderiales;f__Comamonadaceae;g__Tepidimonas;s__Tepidimonas_taiwanensis;
Massilia_timonae	0.0025174	0	0.000333502	6.45488e-05	6.45488e-05	6.45488e-05	0.00017213	8.6065e-05	0	0	0	0	0	4.30325e-05	0	0	4.30325e-05	0	0	0	0.00934881	0	0	6.45488e-05	0.00487343	0.000118339	8.6065e-05	0.000107581	0.000129098	0.00232376	0.000129098	6.45488e-05	8.6065e-05	7.53069e-05	0.00884318	7.53069e-05	0.000825387	k__Bacteria;p__Proteobacteria;c__Betaproteobacteria;o__Burkholderiales;f__Oxalobacteraceae;g__Massilia;s__Massilia_timonae;
Sphingomonas_paucimobilis	0	7.53069e-05	3.22744e-05	9.68231e-05	2.15163e-05	9.68231e-05	0.000258195	0.000225921	0.00215163	2.15163e-05	0.000129098	0.00017213	6.45488e-05	0.000118339	0.000236679	0.00717567	8.6065e-05	0	7.53069e-05	0	1.07581e-05	0.00478737	0.000150614	0.000118339	0.000129098	0.000107581	5.37906e-05	0.00211935	0.0096608	7.53069e-05	0.000161372	5.37906e-05	0.000139856	0.000107581	0.000182888	6.45488e-05	0.000804469	k__Bacteria;p__Proteobacteria;c__Alphaproteobacteria;o__Sphingomonadales;f__Sphingomonadaceae;g__Sphingomonas;s__Sphingomonas_paucimobilis;
Prevotella_maculosa	0	0	6.45488e-05	5.37906e-05	0.000118339	0.000139856	5.37906e-05	0	0	4.30325e-05	4.30325e-05	0	0	6.45488e-05	0	0	6.45488e-05	0	0	0	0	0	0	5.37906e-05	8.6065e-05	0.000118339	7.53069e-05	0.0175573	3.22744e-05	2.15163e-05	5.37906e-05	0.00956397	0.000118339	4.30325e-05	0.000161372	0	0.000792515	k__Bacteria;p__Bacteroidetes;c__Bacteroidia;o__Bacteroidales;f__Prevotellaceae;g__Prevotella;s__Prevotella_maculosa;
Treponema_medium	0	0	1.07581e-05	0.0044969	1.07581e-05	3.22744e-05	0.000301228	0.000129098	0.000139856	0.000118339	0.00017213	0.0180521	0.000247437	0.000182888	0	2.15163e-05	0	3.22744e-05	0.000182888	0.00339957	0	0	9.68231e-05	0	2.15163e-05	0.000182888	3.22744e-05	4.30325e-05	0	0	1.07581e-05	0	2.15163e-05	0	0	8.6065e-05	0.00077847	k__Bacteria;p__Spirochaetes;c__unidentified_Spirochaetes;o__Spirochaetales;f__Spirochaetaceae;g__Treponema_2;s__Treponema_medium;
Acinetobacter_baumannii	0	0.0157607	0.000161372	4.30325e-05	5.37906e-05	0.000118339	0	2.15163e-05	3.22744e-05	1.07581e-05	3.22744e-05	4.30325e-05	0.000279711	2.15163e-05	0	0	0	2.15163e-05	9.68231e-05	0.000107581	0	0.000150614	0.000355018	0.000225921	5.37906e-05	0.000139856	0.00894	8.6065e-05	0	6.45488e-05	1.07581e-05	0	0	0.000236679	0	0.000204404	0.000757551	k__Bacteria;p__Proteobacteria;c__Gammaproteobacteria;o__Pseudomonadales;f__Moraxellaceae;g__Acinetobacter;s__Acinetobacter_baumannii;
Bacteroidetes_bacterium_SM55	0	0	5.37906e-05	0	0	0	0.0233451	1.07581e-05	0	3.22744e-05	3.22744e-05	0.000161372	2.15163e-05	5.37906e-05	1.07581e-05	3.22744e-05	0.000892924	0	9.68231e-05	0	0	0	3.22744e-05	0	0	6.45488e-05	0	0	5.37906e-05	5.37906e-05	9.68231e-05	4.30325e-05	9.68231e-05	8.6065e-05	6.45488e-05	0.00186116	0.000755459	k__Bacteria;p__Bacteroidetes;c__Sphingobacteriia;o__Sphingobacteriales;f__Sphingobacteriaceae;g__Sphingobacterium;s__Bacteroidetes_bacterium_SM55;
Campylobacter_concisus	0	0	2.15163e-05	3.22744e-05	0.012856	2.15163e-05	5.37906e-05	0	0	8.6065e-05	0	0	0	0	3.22744e-05	0	0.000419567	0	0	0	0	0	0	1.07581e-05	4.30325e-05	8.6065e-05	3.22744e-05	6.45488e-05	2.15163e-05	1.07581e-05	3.22744e-05	0.0120599	2.15163e-05	4.30325e-05	9.68231e-05	0	0.000723484	k__Bacteria;p__Proteobacteria;c__Epsilonproteobacteria;o__Campylobacterales;f__Campylobacteraceae;g__Campylobacter;s__Campylobacter_concisus;
Enterococcus_faecalis	0.000118339	0.000161372	2.15163e-05	3.22744e-05	0	2.15163e-05	0.000107581	2.15163e-05	0.00117264	1.07581e-05	7.53069e-05	0.000107581	4.30325e-05	8.6065e-05	2.15163e-05	4.30325e-05	1.07581e-05	3.22744e-05	2.15163e-05	0	0.0110701	0.00194722	0.00311986	0.00559423	0	4.30325e-05	0	4.30325e-05	1.07581e-05	0.00164599	6.45488e-05	3.22744e-05	4.30325e-05	3.22744e-05	7.53069e-05	0.000150614	0.000721691	k__Bacteria;p__Firmicutes;c__Bacilli;o__Lactobacillales;f__Enterococcaceae;g__Enterococcus;s__Enterococcus_faecalis;
Paracoccus_carotinifaciens	1.07581e-05	0	0.000258195	0	0	0	0.000451841	0	0	0	0	0	0	0	0	0	0	0	0	0	0	0	0	0	0	0	0	0	0.000215163	0.0229363	0.000182888	0.000182888	0.000215163	0.000268953	0.00017213	0.000494874	0.000705255	k__Bacteria;p__Proteobacteria;c__Alphaproteobacteria;o__Rhodobacterales;f__Rhodobacteraceae;g__Paracoccus;s__Paracoccus_carotinifaciens;
Cardiobacterium_valvarum	0.0155778	0	0	0	0	1.07581e-05	0	0.0070896	0.00017213	0.000182888	0.000333502	0.000484116	0.000301228	0.00017213	0	0	0	0	2.15163e-05	0	0.000161372	0	0	0	0.000311986	0	0	0	0.000301228	0	0	0	0	0	0	0.000193646	0.000703163	k__Bacteria;p__Proteobacteria;c__Gammaproteobacteria;o__Cardiobacteriales;f__Cardiobacteriaceae;g__Cardiobacterium;s__Cardiobacterium_valvarum;
Anaerococcus_prevotii	0.0123396	6.45488e-05	0	0	0	0	9.68231e-05	0	0	0	0	0	8.6065e-05	0	0	0	0	0	0	0	4.30325e-05	0	0	0	0	0	4.30325e-05	0	3.22744e-05	0	7.53069e-05	5.37906e-05	4.30325e-05	0.0114897	6.45488e-05	0	0.000678658	k__Bacteria;p__Firmicutes;c__Clostridia;o__Clostridiales;f__Family_XI;g__Anaerococcus;s__Anaerococcus_prevotii;
Chryseobacterium_hominis	0	0	3.22744e-05	4.30325e-05	0.0120814	0.000129098	2.15163e-05	0	0	3.22744e-05	6.45488e-05	3.22744e-05	0	0	4.30325e-05	2.15163e-05	0	0.00786419	0.00365776	1.07581e-05	0	2.15163e-05	1.07581e-05	0	2.15163e-05	0.000129098	5.37906e-05	0.000107581	0	0	0	2.15163e-05	1.07581e-05	0	0	0	0.000678061	k__Bacteria;p__Bacteroidetes;c__Flavobacteriia;o__Flavobacteriales;f__Flavobacteriaceae;g__Chryseobacterium;s__Chryseobacterium_hominis;
Lactobacillus_pentosus	0.00640108	0.00262498	0.00017213	0	0	0	0.000215163	7.53069e-05	2.15163e-05	4.30325e-05	8.6065e-05	8.6065e-05	0.000559423	7.53069e-05	0	0	0	0	0	6.45488e-05	8.6065e-05	7.53069e-05	7.53069e-05	8.6065e-05	0	0	0.000365776	0	0.000161372	0.00280787	0.000182888	0.000161372	0.000204404	0.00819769	0.000236679	0.000978989	0.0006679	k__Bacteria;p__Firmicutes;c__Bacilli;o__Lactobacillales;f__Lactobacillaceae;g__Lactobacillus;s__Lactobacillus_pentosus;
Sphingobium_amiense	0	0.000107581	0	0	0	0	0.000247437	0	0	0	0	3.22744e-05	0.000301228	0	5.37906e-05	0.00196874	3.22744e-05	0	2.15163e-05	6.45488e-05	0	0	0	0	0	1.07581e-05	0.000204404	0	8.6065e-05	0.000182888	0.000150614	9.68231e-05	0.00017213	0.0200101	0.000215163	0	0.00066551	k__Bacteria;p__Proteobacteria;c__Alphaproteobacteria;o__Sphingomonadales;f__Sphingomonadaceae;g__Sphingobium;s__Sphingobium_amiense;
Pseudoxanthomonas_taiwanensis	0	0.0122427	0.000118339	5.37906e-05	0.00660549	8.6065e-05	6.45488e-05	0	0	9.68231e-05	0	0	0.000225921	0	0	0	0	0	0	5.37906e-05	0	0.000161372	0.000215163	0.000182888	4.30325e-05	0.000118339	0.000268953	0.000107581	1.07581e-05	0.00265726	2.15163e-05	0.000129098	7.53069e-05	0.000161372	2.15163e-05	7.53069e-05	0.000661027	k__Bacteria;p__Proteobacteria;c__Gammaproteobacteria;o__Xanthomonadales;f__Xanthomonadaceae;g__Pseudoxanthomonas;s__Pseudoxanthomonas_taiwanensis;
Acinetobacter_schindleri	1.07581e-05	3.22744e-05	0	0	0	0	0.000107581	0	0	0	0	9.68231e-05	0	0	0	7.53069e-05	0	0.000290469	0.0226136	7.53069e-05	0	0	8.6065e-05	0	0	0.000204404	0	0	0	0	0	0	0	0	0	0	0.000655349	k__Bacteria;p__Proteobacteria;c__Gammaproteobacteria;o__Pseudomonadales;f__Moraxellaceae;g__Acinetobacter;s__Acinetobacter_schindleri;
[Eubacterium]_infirmum	0	0.000150614	0	0	0	0	0	0	0	0	0	0	0	0.000161372	0	0	6.45488e-05	0	0	0	0	0.000182888	0.000279711	0.021882	0	0	0	0.000118339	0	0	0	0	0	0	8.6065e-05	0	0.000636821	k__Bacteria;p__Firmicutes;c__Clostridia;o__Clostridiales;f__Family_XIII;g__[Eubacterium]_nodatum_group;s__[Eubacterium]_infirmum;
Streptobacillus_hongkongensis	0	0	0	0	0	0	9.68231e-05	0	0	0	0	0	0	8.6065e-05	0	0	0.000139856	0	2.15163e-05	0	0	0	0	5.37906e-05	0	0	0	6.45488e-05	5.37906e-05	6.45488e-05	4.30325e-05	6.45488e-05	0.000107581	0.000118339	0.0219035	0	0.000633833	k__Bacteria;p__Fusobacteria;c__Fusobacteriia;o__Fusobacteriales;f__Leptotrichiaceae;g__Streptobacillus;s__Streptobacillus_hongkongensis;
Fonticella_tunisiensis	0	0	0	0	0	9.68231e-05	0.000623971	0.000699278	0.000398051	0.000505632	0.000946715	0.00861726	0.0010543	0.00068852	6.45488e-05	0.000290469	0	0.00374383	0.0010543	0.00158144	0	4.30325e-05	0.000613213	1.07581e-05	0	0.000731553	3.22744e-05	2.15163e-05	0	0	0	0	4.30325e-05	2.15163e-05	0	0.000258195	0.000615006	k__Bacteria;p__Firmicutes;c__Clostridia;o__Clostridiales;f__Clostridiaceae_1;g__Fonticella;s__Fonticella_tunisiensis;
Treponema_sp._9:A:D01	0	0	2.15163e-05	1.07581e-05	0	2.15163e-05	0	0	0	0	0	0	2.15163e-05	2.15163e-05	0	0	1.07581e-05	5.37906e-05	9.68231e-05	0.00989748	0	0	0	1.07581e-05	2.15163e-05	4.30325e-05	6.45488e-05	0.0112315	0	0	0	0	0	1.07581e-05	2.15163e-05	0	0.000598869	k__Bacteria;p__Spirochaetes;c__unidentified_Spirochaetes;o__Spirochaetales;f__Spirochaetaceae;g__Treponema_2;s__Treponema_sp._9:A:D01;
Capnocytophaga_leadbetteri	0	0.0125978	2.15163e-05	0	0.0042387	4.30325e-05	3.22744e-05	0	0	1.07581e-05	0	1.07581e-05	6.45488e-05	0	0	2.15163e-05	0	0	6.45488e-05	2.15163e-05	0	4.30325e-05	0.000129098	0.000118339	2.15163e-05	0.0037761	0.000161372	1.07581e-05	0	0	0	1.07581e-05	0	4.30325e-05	0	0	0.000595582	k__Bacteria;p__Bacteroidetes;c__Flavobacteriia;o__Flavobacteriales;f__Flavobacteriaceae;g__Capnocytophaga;s__Capnocytophaga_leadbetteri;
Gordonia_terrae	0	0	0.000129098	8.6065e-05	9.68231e-05	0.00017213	8.6065e-05	0	0	0	0	4.30325e-05	0	0.000118339	0	4.30325e-05	5.37906e-05	0	2.15163e-05	0	2.15163e-05	0	5.37906e-05	9.68231e-05	5.37906e-05	0.00288318	0.000129098	0.0128775	3.22744e-05	0.00313061	2.15163e-05	3.22744e-05	6.45488e-05	3.22744e-05	6.45488e-05	7.53069e-05	0.000567192	k__Bacteria;p__Actinobacteria;c__unidentified_Actinobacteria;o__Corynebacteriales;f__Nocardiaceae;g__Gordonia;s__Gordonia_terrae;
Bacillus_ginsengihumi	0	0	9.68231e-05	8.6065e-05	0.00930578	0.000623971	0	0.00694975	0.000215163	0.000322744	0.000236679	0.00034426	0.000258195	0.000215163	2.15163e-05	0	0	0.000333502	0	1.07581e-05	0	0	0	0	0.000355018	0.000204404	0.00017213	0.000139856	0.000247437	0	1.07581e-05	4.30325e-05	4.30325e-05	0	0	0.00017213	0.000566893	k__Bacteria;p__Firmicutes;c__Bacilli;o__Bacillales;f__Bacillaceae;g__Bacillus;s__Bacillus_ginsengihumi;
Pseudomonas_stutzeri	1.07581e-05	1.07581e-05	0.000118339	0.000107581	7.53069e-05	0.000129098	8.6065e-05	0	0	0	0	0.000107581	0	8.6065e-05	0	3.22744e-05	1.07581e-05	9.68231e-05	0.00718643	2.15163e-05	1.07581e-05	0	7.53069e-05	9.68231e-05	7.53069e-05	0.000258195	0.000150614	0.00876787	0	0.00214087	3.22744e-05	3.22744e-05	2.15163e-05	4.30325e-05	0.000107581	3.22744e-05	0.000553446	k__Bacteria;p__Proteobacteria;c__Gammaproteobacteria;o__Pseudomonadales;f__Pseudomonadaceae;g__Pseudomonas;s__Pseudomonas_stutzeri;
Actinomyces_massiliensis	0	0	0	6.45488e-05	0	0	0.000258195	0	9.68231e-05	0	0	0.000107581	0	0	0	0	0	0	0	0	0	0	1.07581e-05	0	0	0	0	0	7.53069e-05	0.000193646	0.0180199	4.30325e-05	0.000118339	0.000139856	0.00017213	0	0.000536113	k__Bacteria;p__Actinobacteria;c__unidentified_Actinobacteria;o__Actinomycetales;f__Actinomycetaceae;g__Actinomyces;s__Actinomyces_massiliensis;
Leptotrichia_hofstadii	0	2.15163e-05	0	0	0	0	0	0	0	0	0	0	5.37906e-05	0	0	0	0	0.000107581	0.000182888	0.0183534	1.07581e-05	0	0	0	0	0	7.53069e-05	0	0	0	0	0	0	6.45488e-05	0	0	0.00052416	k__Bacteria;p__Fusobacteria;c__Fusobacteriia;o__Fusobacteriales;f__Leptotrichiaceae;g__Leptotrichia;s__Leptotrichia_hofstadii;
Barrientosiimonas_humi	0	0	8.6065e-05	3.22744e-05	5.37906e-05	0.000118339	0.00519617	0	0	0	0	8.6065e-05	0	0.000139856	0	4.30325e-05	3.22744e-05	0	1.07581e-05	0	0	0	4.30325e-05	6.45488e-05	5.37906e-05	0.000225921	0.000129098	0.0119415	3.22744e-05	7.53069e-05	2.15163e-05	3.22744e-05	7.53069e-05	3.22744e-05	8.6065e-05	0	0.000516988	k__Bacteria;p__Actinobacteria;c__unidentified_Actinobacteria;o__Micrococcales;f__Dermacoccaceae;g__Barrientosiimonas;s__Barrientosiimonas_humi;
Rhodococcus_erythropolis	0.00693899	0	7.53069e-05	0.000268953	0	0	3.22744e-05	0.000193646	0.0057556	8.6065e-05	0.000182888	0.000247437	0.000204404	0.000182888	0	0	0	0	0	0	3.22744e-05	0	1.07581e-05	0	0	2.15163e-05	0	0	2.15163e-05	0.00327047	0.000290469	1.07581e-05	4.30325e-05	2.15163e-05	3.22744e-05	0.000129098	0.000501448	k__Bacteria;p__Actinobacteria;c__unidentified_Actinobacteria;o__Corynebacteriales;f__Nocardiaceae;g__Rhodococcus;s__Rhodococcus_erythropolis;
Bacillus_thermoamylovorans	0	0	0	0	0	0	0	0.000322744	0.000182888	0.000225921	0.000419567	0.000602455	0.000559423	0.0138242	0	1.07581e-05	0.000118339	0	0	0	0	0	1.07581e-05	0.000290469	0	0	0	0.000494874	0	0	0	0	0	1.07581e-05	0.000387293	0.000182888	0.000490092	k__Bacteria;p__Firmicutes;c__Bacilli;o__Bacillales;f__Bacillaceae;g__Bacillus;s__Bacillus_thermoamylovorans;
Rhizobium_giardinii	0	0	0.000139856	0.000161372	0.000129098	0.000225921	0.000161372	0	0	0	0	0.00034426	0	0	0	0.000139856	0	0	0.000236679	0	0	0	0.000150614	0	9.68231e-05	0.0151582	0.000236679	0.000193646	0	0	0	0	0	0	0	0	0.000482621	k__Bacteria;p__Proteobacteria;c__Alphaproteobacteria;o__Rhizobiales;f__Rhizobiaceae;g__Rhizobium;s__Rhizobium_giardinii;
Sphingopyxis_alaskensis	0	0	0	0.00017213	0	0	0.000225921	0	0.000236679	0	0	0	0	0	0	0	0	0	0	0	0	0	0	0	0	0	0	0	0.000107581	9.68231e-05	0.0150076	0.000118339	0.000204404	9.68231e-05	0.000129098	0	0.000455427	k__Bacteria;p__Proteobacteria;c__Alphaproteobacteria;o__Sphingomonadales;f__Sphingomonadaceae;g__Sphingopyxis;s__Sphingopyxis_alaskensis;
Porphyromonas_sp._oral_clone_HF001	0	5.37906e-05	3.22744e-05	1.07581e-05	2.15163e-05	0.00329199	0	0	0	2.15163e-05	9.68231e-05	3.22744e-05	2.15163e-05	1.07581e-05	6.45488e-05	0	0	3.22744e-05	0	0	0	0.0110486	7.53069e-05	6.45488e-05	1.07581e-05	2.15163e-05	2.15163e-05	3.22744e-05	0	3.22744e-05	0	0	8.6065e-05	0	0	0.000742311	0.000439589	k__Bacteria;p__Bacteroidetes;c__Bacteroidia;o__Bacteroidales;f__Porphyromonadaceae;g__Porphyromonas;s__Porphyromonas_sp._oral_clone_HF001;
Treponema_amylovorum	0	0	0.000774585	0	1.07581e-05	3.22744e-05	0	0	0	0	2.15163e-05	0	0	0	0.0131464	5.37906e-05	4.30325e-05	3.22744e-05	1.07581e-05	0.000796101	0	2.15163e-05	0	0	3.22744e-05	0	1.07581e-05	0	0	0	0	0	2.15163e-05	0	0	0	0.000416877	k__Bacteria;p__Spirochaetes;c__unidentified_Spirochaetes;o__Spirochaetales;f__Spirochaetaceae;g__Treponema_2;s__Treponema_amylovorum;
Actinomyces_israelii	0	0	2.15163e-05	0	0	0	0.000387293	0.000258195	0.000258195	0.000225921	0.00034426	0.0114036	0.000376534	0.000268953	0	0.000161372	2.15163e-05	0	0.000193646	0	0	0	0.000247437	0	0	0.000419567	0	1.07581e-05	0	0	0	0	0	0	0	0.000311986	0.000414188	k__Bacteria;p__Actinobacteria;c__unidentified_Actinobacteria;o__Actinomycetales;f__Actinomycetaceae;g__Actinomyces;s__Actinomyces_israelii;
Lactobacillus_iners	0	0.000129098	0	1.07581e-05	0	0	0	0	0	0	0	0	0	0.000193646	0	0	4.30325e-05	0	0	0	0	0.000139856	0.000215163	0.0138995	0	0	0	0.000139856	0	0	0	0	0	0	9.68231e-05	0	0.000412992	k__Bacteria;p__Firmicutes;c__Bacilli;o__Lactobacillales;f__Lactobacillaceae;g__Lactobacillus;s__Lactobacillus_iners;
Treponema_sp._VI:F:C44	0	1.07581e-05	3.22744e-05	2.15163e-05	2.15163e-05	4.30325e-05	0	0	0	0	0	0	2.15163e-05	0	0	0	0	0	0	1.07581e-05	0	0	0	0	1.07581e-05	4.30325e-05	0.0140071	4.30325e-05	0	0	0	0	0	2.15163e-05	0	0	0.000396855	k__Bacteria;p__Spirochaetes;c__unidentified_Spirochaetes;o__Spirochaetales;f__Spirochaetaceae;g__Treponema_2;s__Treponema_sp._VI:F:C44;
Prevotella_histicola	0	0	0.00419567	1.07581e-05	2.15163e-05	0.00017213	6.45488e-05	2.15163e-05	0	0	2.15163e-05	0	1.07581e-05	1.07581e-05	2.15163e-05	0	0.000742311	2.15163e-05	6.45488e-05	0	0	0	0	1.07581e-05	0.00398051	0.000107581	6.45488e-05	6.45488e-05	0.00253892	4.30325e-05	2.15163e-05	0	0.00160296	2.15163e-05	2.15163e-05	0.00034426	0.000394465	k__Bacteria;p__Bacteroidetes;c__Bacteroidia;o__Bacteroidales;f__Prevotellaceae;g__Prevotella_7;s__Prevotella_histicola;
Rhodococcus_fascians	0	0	0.000129098	5.37906e-05	8.6065e-05	0.000118339	0	1.07581e-05	0	0	1.07581e-05	2.15163e-05	2.15163e-05	0.000129098	0	0	4.30325e-05	0	0	0	1.07581e-05	0	0	6.45488e-05	9.68231e-05	0.000161372	9.68231e-05	0.012275	0	3.22744e-05	0	0	0	1.07581e-05	0.000129098	0.000430325	0.000386994	k__Bacteria;p__Actinobacteria;c__unidentified_Actinobacteria;o__Corynebacteriales;f__Nocardiaceae;g__Rhodococcus;s__Rhodococcus_fascians;
Halomonas_meridiana	0	0.000150614	0	0	1.07581e-05	2.15163e-05	0	0.000398051	0.00017213	0.000279711	0.000462599	0.000580939	0.00782116	0.000279711	0	0	5.37906e-05	0	0	0.000150614	0	0	0	0	0.00155993	4.30325e-05	0.000494874	1.07581e-05	0	1.07581e-05	0	0	0	0.000279711	0	0.000193646	0.000360397	k__Bacteria;p__Proteobacteria;c__Gammaproteobacteria;o__Oceanospirillales;f__Halomonadaceae;g__Halomonas;s__Halomonas_meridiana;
SR1_bacterium_human_oral_taxon_HOT-345	0	0	0	0	0	0	4.30325e-05	0	0	0	0	0	0	5.37906e-05	0	0	1.07581e-05	0	0	0	0	0	0	1.07581e-05	0	0	0	3.22744e-05	3.22744e-05	1.07581e-05	0	1.07581e-05	4.30325e-05	3.22744e-05	0.0118877	0	0.000337984	k__Bacteria;p__SR1_(Absconditabacteria);c__unidentified_SR1_(Absconditabacteria);o__unidentified_SR1_(Absconditabacteria);f__unidentified_SR1_(Absconditabacteria);g__unidentified_SR1_(Absconditabacteria);s__SR1_bacterium_human_oral_taxon_HOT-345;
Treponema_denticola	0	0	0	0	3.22744e-05	0	0	2.15163e-05	2.15163e-05	0.01121	5.37906e-05	0.000118339	2.15163e-05	6.45488e-05	0	0	0	0	0	0	0	0	0	0	0	0	0	0	0	0	0	2.15163e-05	0	0	0	2.15163e-05	0.000321847	k__Bacteria;p__Spirochaetes;c__unidentified_Spirochaetes;o__Spirochaetales;f__Spirochaetaceae;g__Treponema_2;s__Treponema_denticola;
Clostridiales_bacterium_S5-A14a	0	0.000139856	0	0	6.45488e-05	0	4.30325e-05	2.15163e-05	2.15163e-05	0.000946715	3.22744e-05	0.000215163	7.53069e-05	3.22744e-05	0	2.15163e-05	0	0	8.6065e-05	0	0	0.000150614	0.00926275	0.000150614	0	4.30325e-05	0	1.07581e-05	1.07581e-05	0	0	6.45488e-05	0	0	0	0	0.000316468	k__Bacteria;p__Firmicutes;c__Clostridia;o__Clostridiales;f__Family_XIII;g__unidentified_Family_XIII;s__Clostridiales_bacterium_S5-A14a;
Aerococcus_viridans	0	0	0	0	0.000150614	0	0.000182888	0	0	0.000215163	0	0	0	0	0	0	0	0	0	0	0	0	0	0	0	0	0	0	0.000129098	0.000118339	0.000129098	0.00980065	0.000161372	0.000182888	0.00017213	0	0.000312284	k__Bacteria;p__Firmicutes;c__Bacilli;o__Lactobacillales;f__Aerococcaceae;g__Aerococcus;s__Aerococcus_viridans;
Capnocytophaga_granulosa	0	0	3.22744e-05	0	0	0	4.30325e-05	0	0	0	0	0	1.07581e-05	0	0	0	0	6.45488e-05	9.68231e-05	0.00384065	0	0	0	0	0	0	1.07581e-05	0	2.15163e-05	0.00660549	1.07581e-05	2.15163e-05	4.30325e-05	4.30325e-05	4.30325e-05	3.22744e-05	0.000303319	k__Bacteria;p__Bacteroidetes;c__Flavobacteriia;o__Flavobacteriales;f__Flavobacteriaceae;g__Capnocytophaga;s__Capnocytophaga_granulosa;
Spirochaeta_sp._HT	0	0	0	0.000806859	1.07581e-05	1.07581e-05	6.45488e-05	6.45488e-05	0	0	0	0	0	0	0	0	0	0	0	0	0	0	0	0	3.22744e-05	2.15163e-05	1.07581e-05	1.07581e-05	0.00934881	2.15163e-05	4.30325e-05	4.30325e-05	2.15163e-05	3.22744e-05	3.22744e-05	0	0.000293757	k__Bacteria;p__Spirochaetes;c__unidentified_Spirochaetes;o__Spirochaetales;f__Spirochaetaceae;g__Treponema;s__Spirochaeta_sp._HT;
Prevotella_marshii	0	0	5.37906e-05	0	0.00658397	4.30325e-05	2.15163e-05	0	0	3.22744e-05	0	0	0	0	0	0	0	0	0	0	0	0	0	0	1.07581e-05	4.30325e-05	2.15163e-05	3.22744e-05	0	0.00342108	0	2.15163e-05	5.37906e-05	1.07581e-05	2.15163e-05	2.15163e-05	0.000288676	k__Bacteria;p__Bacteroidetes;c__Bacteroidia;o__Bacteroidales;f__Prevotellaceae;g__Prevotella_2;s__Prevotella_marshii;
Leptotrichia_sp._oral_clone_IK040	0	0	0	0	4.30325e-05	0	3.22744e-05	0	0	3.22744e-05	0	0	0	0	0	0	0	0	0	0	0	0	0	0	0	0	0	0	0	4.30325e-05	2.15163e-05	0.0100588	4.30325e-05	6.45488e-05	3.22744e-05	0	0.000288079	k__Bacteria;p__Fusobacteria;c__Fusobacteriia;o__Fusobacteriales;f__Leptotrichiaceae;g__Leptotrichia;s__Leptotrichia_sp._oral_clone_IK040;
Brevibacillus_thermoruber	0	0	0	0	0	0	0.00792874	0	0	0	1.07581e-05	0.000462599	0	0	0	7.53069e-05	0	0	0.000161372	0	0	0	0.000150614	0	0	0.000258195	0	0	0.000139856	7.53069e-05	0.000129098	0.000193646	0.000204404	0.000247437	0.00017213	0	0.000283596	k__Bacteria;p__Firmicutes;c__Bacilli;o__Bacillales;f__Paenibacillaceae;g__Brevibacillus;s__Brevibacillus_thermoruber;
Dialister_propionicifaciens	0	3.22744e-05	2.15163e-05	2.15163e-05	4.30325e-05	7.53069e-05	4.30325e-05	6.45488e-05	0	0	0	0	7.53069e-05	0	0	0	0	0	0	0	0	0	0	0	9.68231e-05	9.68231e-05	0.00623971	6.45488e-05	0.00276484	0	2.15163e-05	6.45488e-05	4.30325e-05	7.53069e-05	3.22744e-05	0	0.000274332	k__Bacteria;p__Firmicutes;c__Negativicutes;o__Selenomonadales;f__Veillonellaceae;g__Dialister;s__Dialister_propionicifaciens;
Variovorax_paradoxus	6.45488e-05	0	0	0	0	0	0	0	0	0	0	0	0	0	0	0	0	0	0	0	0.00930578	0	0	0	0	0	0	0	0	0	0	0	0	0	0	0	0.000260287	k__Bacteria;p__Proteobacteria;c__Betaproteobacteria;o__Burkholderiales;f__Comamonadaceae;g__Variovorax;s__Variovorax_paradoxus;
Macrococcus_brunensis	0	0.00831603	0	0	0	0	0	0	0	0	0	0	0.000204404	0	0	0	0	0	0	3.22744e-05	0	0.000193646	0.000258195	0.00017213	0	0	9.68231e-05	0	0	0	0	0	0	5.37906e-05	0	0	0.000259092	k__Bacteria;p__Firmicutes;c__Bacilli;o__Bacillales;f__Staphylococcaceae;g__Macrococcus;s__Macrococcus_brunensis;
Stenotrophomonas_rhizophila	0	0	0	0	0	0.000150614	0	0	0	0	0.000150614	0	0	0	9.68231e-05	0	0	0.00842361	0.000193646	6.45488e-05	0	6.45488e-05	0	0	0	0	0	0	0	0	0	0	8.6065e-05	0	0	0	0.000256402	k__Bacteria;p__Proteobacteria;c__Gammaproteobacteria;o__Xanthomonadales;f__Xanthomonadaceae;g__Stenotrophomonas;s__Stenotrophomonas_rhizophila;
Prevotella_nanceiensis	0	3.22744e-05	0	0	0	0	0	3.22744e-05	2.15163e-05	2.15163e-05	5.37906e-05	6.45488e-05	0.00848816	4.30325e-05	0	0	0	0	0	2.15163e-05	0	0	0	0	0	0	6.45488e-05	0	0	0	0	0	0	4.30325e-05	0	1.07581e-05	0.000247138	k__Bacteria;p__Bacteroidetes;c__Bacteroidia;o__Bacteroidales;f__Prevotellaceae;g__Prevotella;s__Prevotella_nanceiensis;
Prevotella_denticola	0	0	0	3.22744e-05	0	0	0.00518542	4.30325e-05	0.00288318	1.07581e-05	6.45488e-05	6.45488e-05	3.22744e-05	2.15163e-05	0	0	0	0	2.15163e-05	0	0	0	2.15163e-05	0	0	7.53069e-05	0	0	2.15163e-05	2.15163e-05	2.15163e-05	2.15163e-05	4.30325e-05	3.22744e-05	6.45488e-05	4.30325e-05	0.000242357	k__Bacteria;p__Bacteroidetes;c__Bacteroidia;o__Bacteroidales;f__Prevotellaceae;g__Prevotella_7;s__Prevotella_denticola;
Bifidobacterium_adolescentis	0	0	0	0	4.30325e-05	0	0.000118339	0	0	8.6065e-05	0	0	0	0	0	0	0	0	0	0	0	0	0	0	0	0	0	0	5.37906e-05	4.30325e-05	2.15163e-05	0.00795025	7.53069e-05	3.22744e-05	6.45488e-05	0	0.000235782	k__Bacteria;p__Actinobacteria;c__unidentified_Actinobacteria;o__Bifidobacteriales;f__Bifidobacteriaceae;g__Bifidobacterium;s__Bifidobacterium_adolescentis;
Paenibacillus_validus	0	3.22744e-05	0.000129098	5.37906e-05	8.6065e-05	0.000129098	0	0	0	0	0	0	8.6065e-05	7.53069e-05	0	0	2.15163e-05	0	0	1.07581e-05	0	0	0	4.30325e-05	7.53069e-05	0.000182888	0.00308758	0.00412036	0	0	0	0	0	7.53069e-05	7.53069e-05	0	0.000230104	k__Bacteria;p__Firmicutes;c__Bacilli;o__Bacillales;f__Paenibacillaceae;g__Paenibacillus;s__Paenibacillus_validus;
[Eubacterium]_nodatum	0	0	0	3.22744e-05	0	0	9.68231e-05	0	5.37906e-05	0	0	0	0	0	0	0	0	0	0	0	0	0	0	0	0	0	0	0	3.22744e-05	3.22744e-05	0.00713264	6.45488e-05	5.37906e-05	3.22744e-05	6.45488e-05	0	0.000210979	k__Bacteria;p__Firmicutes;c__Clostridia;o__Clostridiales;f__Family_XIII;g__[Eubacterium]_nodatum_group;s__[Eubacterium]_nodatum;
Capnocytophaga_ochracea	0	0.00711112	0	0	0	0	0	0	0	0	0	0	4.30325e-05	0	0	0	0	0	0	1.07581e-05	0	3.22744e-05	6.45488e-05	2.15163e-05	0	0	3.22744e-05	0	0	0	0	0	0	5.37906e-05	0	0	0.000204703	k__Bacteria;p__Bacteroidetes;c__Flavobacteriia;o__Flavobacteriales;f__Flavobacteriaceae;g__Capnocytophaga;s__Capnocytophaga_ochracea;
Streptococcus_sobrinus	0	0	0	0	0	0.000204404	0	0.000118339	8.6065e-05	9.68231e-05	0.0058309	0.000150614	0.000139856	0.000129098	8.6065e-05	0	0	6.45488e-05	0	0	0	7.53069e-05	0	0	0	0	0	0	0	0	0	0	0.00017213	0	0	8.6065e-05	0.000201117	k__Bacteria;p__Firmicutes;c__Bacilli;o__Lactobacillales;f__Streptococcaceae;g__Streptococcus;s__Streptococcus_sobrinus;
Acinetobacter_sp._CIP_53.82	0	0	7.53069e-05	3.22744e-05	0.00440007	7.53069e-05	4.30325e-05	0	0	4.30325e-05	0	0	0	0	0	0	0	0	0	0	0	0	0	0	2.15163e-05	0.000107581	6.45488e-05	2.15163e-05	0	0.00200101	2.15163e-05	4.30325e-05	3.22744e-05	3.22744e-05	2.15163e-05	2.15163e-05	0.000196037	k__Bacteria;p__Proteobacteria;c__Gammaproteobacteria;o__Pseudomonadales;f__Moraxellaceae;g__Acinetobacter;s__Acinetobacter_sp._CIP_53.82;
Shewanella_putrefaciens	0	0	5.37906e-05	5.37906e-05	0.00591697	9.68231e-05	0	0	0	6.45488e-05	0	0	0	0	0	0	0	0	0	0	0	0	0	0	6.45488e-05	0.000129098	0.000129098	0.000107581	0	0	0	2.15163e-05	0	0	0	0	0.000184382	k__Bacteria;p__Proteobacteria;c__Gammaproteobacteria;o__Alteromonadales;f__Shewanellaceae;g__Shewanella;s__Shewanella_putrefaciens;
Pseudoxanthomonas_mexicana	0	0	0	0	0	0.000279711	0	0	0	0	0.00034426	0	0	0	0.00501329	0.000204404	7.53069e-05	0.000182888	0	0	0	0.000118339	0	0	0	0	0	0	0	0	0	0	0.000279711	0	0	0	0.000180497	k__Bacteria;p__Proteobacteria;c__Gammaproteobacteria;o__Xanthomonadales;f__Xanthomonadaceae;g__Pseudoxanthomonas;s__Pseudoxanthomonas_mexicana;
Porphyromonas_bennonis	0	0	0	0	2.15163e-05	0	0	2.15163e-05	7.53069e-05	0.00600303	6.45488e-05	6.45488e-05	5.37906e-05	6.45488e-05	0	0	0	0	0	0	0	0	0	0	0	0	0	0	0	0	0	3.22744e-05	0	0	0	4.30325e-05	0.000179003	k__Bacteria;p__Bacteroidetes;c__Bacteroidia;o__Bacteroidales;f__Porphyromonadaceae;g__Porphyromonas;s__Porphyromonas_bennonis;
Psychrobacter_sanguinis	0	0	6.45488e-05	3.22744e-05	5.37906e-05	5.37906e-05	0	0	0	0	0	0	0	1.07581e-05	0	0	1.07581e-05	0	0	0	1.07581e-05	0	0	2.15163e-05	3.22744e-05	6.45488e-05	5.37906e-05	0.00592773	0	0	0	0	0	0	4.30325e-05	0	0.00017721	k__Bacteria;p__Proteobacteria;c__Gammaproteobacteria;o__Pseudomonadales;f__Moraxellaceae;g__Psychrobacter;s__Psychrobacter_sanguinis;
Geobacter_lovleyi	0	0.000118339	0	0	0	0	5.37906e-05	0	0	0	0	0.000161372	0	0	0	4.30325e-05	0	0	9.68231e-05	0	0	0.000161372	0.00552968	0.000129098	0	8.6065e-05	0	0	0	0	0	0	0	0	0	0	0.00017721	k__Bacteria;p__Proteobacteria;c__Deltaproteobacteria;o__Desulfuromonadales;f__Geobacteraceae;g__Geobacter;s__Geobacter_lovleyi;
Bacteroides_vulgatus	0	0	0	0	0	0	2.15163e-05	0	0	0	0	0	0	0	0	0	2.15163e-05	0	0	0	0	0	0	0	0	0	0	3.22744e-05	2.15163e-05	4.30325e-05	0	2.15163e-05	2.15163e-05	1.07581e-05	0.00603531	0	0.000173027	k__Bacteria;p__Bacteroidetes;c__Bacteroidia;o__Bacteroidales;f__Bacteroidaceae;g__Bacteroides;s__Bacteroides_vulgatus;
Actinomyces_orihominis	0	0	1.07581e-05	0	3.22744e-05	0	3.22744e-05	2.15163e-05	2.15163e-05	0.00104354	2.15163e-05	3.22744e-05	3.22744e-05	3.22744e-05	0	0	0	3.22744e-05	6.45488e-05	0.00171054	0	0	0	0	0	0	1.07581e-05	0	2.15163e-05	3.22744e-05	0.0027756	6.45488e-05	4.30325e-05	4.30325e-05	5.37906e-05	5.37906e-05	0.000171831	k__Bacteria;p__Actinobacteria;c__unidentified_Actinobacteria;o__Actinomycetales;f__Actinomycetaceae;g__Actinomyces;s__Actinomyces_orihominis;
Bacillales_bacterium_V-9	0	0.000129098	0	0	0	0	0	0.000139856	5.37906e-05	0.000139856	0.000236679	0.000247437	0.00426022	0.000258195	0	0	0	0	0	4.30325e-05	0	0	0	0	0	0	0.000290469	0	0	0	0	0	0	0.000204404	1.07581e-05	0.000107581	0.000170038	k__Bacteria;p__Firmicutes;c__Bacilli;o__Bacillales;f__Paenibacillaceae;g__Paenibacillus;s__Bacillales_bacterium_V-9;
Prevotella_loescheii	0	0	0	0	0	1.07581e-05	0	0	1.07581e-05	0	3.22744e-05	1.07581e-05	0.00246361	3.22744e-05	0.00325971	2.15163e-05	0	3.22744e-05	0	1.07581e-05	0	0	0	0	0	0	4.30325e-05	0	0	0	0	0	1.07581e-05	2.15163e-05	0	0	0.000165556	k__Bacteria;p__Bacteroidetes;c__Bacteroidia;o__Bacteroidales;f__Prevotellaceae;g__Prevotella_2;s__Prevotella_loescheii;
Capnocytophaga_gingivalis	0	0	0	0	0	0	0.00356094	0	0	0	0	1.07581e-05	0	0	0	0	0	0	2.15163e-05	0.000161372	0	0	1.07581e-05	0	0	2.15163e-05	0	0	0	0.000419567	4.30325e-05	1.07581e-05	4.30325e-05	3.22744e-05	2.15163e-05	0	0.000121029	k__Bacteria;p__Bacteroidetes;c__Flavobacteriia;o__Flavobacteriales;f__Flavobacteriaceae;g__Capnocytophaga;s__Capnocytophaga_gingivalis;
Pseudomonas_luteola	0	7.53069e-05	0	0	0	0	2.15163e-05	0.000129098	0.000107581	6.45488e-05	0.000182888	0.000182888	0.00278635	0.000107581	0	0	0	0	0	5.37906e-05	0	0	0	0	0	0	0.000182888	0	0	0	0	0	0	0.000161372	0	9.68231e-05	0.000115351	k__Bacteria;p__Proteobacteria;c__Gammaproteobacteria;o__Pseudomonadales;f__Pseudomonadaceae;g__Pseudomonas;s__Pseudomonas_luteola;
Ralstonia_mannitolilytica	0	0	5.37906e-05	0	0	0	0.000118339	0	0	0	0	0	0	0	0	0	0	0	0	0	0	0	0	0	0	0	0	0	1.07581e-05	0.003647	4.30325e-05	3.22744e-05	8.6065e-05	3.22744e-05	3.22744e-05	3.22744e-05	0.000113558	k__Bacteria;p__Proteobacteria;c__Betaproteobacteria;o__Burkholderiales;f__Burkholderiaceae;g__Ralstonia;s__Ralstonia_mannitolilytica;
Lactobacillus_casei	0	0	4.30325e-05	3.22744e-05	6.45488e-05	5.37906e-05	0	0.000139856	0	0	0	0	0	0	0	0	0	0	0	0	0	0	0	0	0.00346412	9.68231e-05	7.53069e-05	6.45488e-05	5.37906e-05	0	0	0	0	0	0	0	0.000113558	k__Bacteria;p__Firmicutes;c__Bacilli;o__Lactobacillales;f__Lactobacillaceae;g__Lactobacillus;s__Lactobacillus_casei;
Brochothrix_thermosphacta	0	0	0	0	0	6.45488e-05	0	0	0	0	0.000118339	0	0	0	3.22744e-05	0	0	0.00363625	8.6065e-05	6.45488e-05	0	4.30325e-05	0	0	0	0	0	0	0	0	0	0	4.30325e-05	0	0	0	0.000113558	k__Bacteria;p__Firmicutes;c__Bacilli;o__Bacillales;f__Listeriaceae;g__Brochothrix;s__Brochothrix_thermosphacta;
Turneriella_parva	0	0	1.07581e-05	0.00334578	0	1.07581e-05	0	0	2.15163e-05	0	0	0	0	0	0	0	0	0	0	0	0	0	0	0	0	4.30325e-05	3.22744e-05	4.30325e-05	0	0	4.30325e-05	0	0	0	0	0	9.86161e-05	k__Bacteria;p__Spirochaetes;c__unidentified_Spirochaetes;o__Spirochaetales;f__Leptospiraceae;g__Turneriella;s__Turneriella_parva;
Prevotella_buccalis	0	1.07581e-05	0	0	0	2.15163e-05	0	0	0	0	2.15163e-05	0	0	0	1.07581e-05	0	0	0	0	0	0	0.00298	2.15163e-05	3.22744e-05	0	0	0	0	0	0	0	0	3.22744e-05	0	0	0	8.69615e-05	k__Bacteria;p__Bacteroidetes;c__Bacteroidia;o__Bacteroidales;f__Prevotellaceae;g__Prevotella;s__Prevotella_buccalis;
Arthrobacter_agilis	0	0.00247437	3.22744e-05	0	0	0	0	0	0	2.15163e-05	1.07581e-05	1.07581e-05	8.6065e-05	0	0	0	0	0	0	1.07581e-05	0	5.37906e-05	6.45488e-05	4.30325e-05	0	0	4.30325e-05	0	0	1.07581e-05	0	0	0	3.22744e-05	0	0.000204404	8.6065e-05	k__Bacteria;p__Actinobacteria;c__unidentified_Actinobacteria;o__Micrococcales;f__Micrococcaceae;g__Arthrobacter;s__Arthrobacter_agilis;
[Bacteroides]_coagulans	0	1.07581e-05	2.15163e-05	1.07581e-05	2.15163e-05	2.15163e-05	0	0	0	0	0	0	3.22744e-05	0	0	0	0	0	0	0	0	0	0	0	1.07581e-05	3.22744e-05	0.00268953	3.22744e-05	0	0	0	0	0	2.15163e-05	0	0	8.06859e-05	k__Bacteria;p__Firmicutes;c__Clostridia;o__Clostridiales;f__Family_XI;g__Ezakiella;s__[Bacteroides]_coagulans;
Peptococcus_niger	0	0	1.07581e-05	3.22744e-05	1.07581e-05	0.00215163	0	0	0	0	6.45488e-05	0	0	0	3.22744e-05	0	0	2.15163e-05	0	0	0	3.22744e-05	0	0	0	3.22744e-05	6.45488e-05	3.22744e-05	0	0	0	0	3.22744e-05	0	0	0	6.99278e-05	k__Bacteria;p__Firmicutes;c__Clostridia;o__Clostridiales;f__Peptococcaceae;g__Peptococcus;s__Peptococcus_niger;
Flavobacterium_indicum	0	0	0	0	0	0	1.07581e-05	0	0	0	0	0	0	0	0	0	0	1.07581e-05	0.00235603	0	0	0	1.07581e-05	0	0	1.07581e-05	0	0	0	0	0	0	0	0	0	0	6.66406e-05	k__Bacteria;p__Bacteroidetes;c__Flavobacteriia;o__Flavobacteriales;f__Flavobacteriaceae;g__Flavobacterium;s__Flavobacterium_indicum;
Burkholderia_cepacia	0	0	0	0	0	0	0.00174282	0	0	0	0	5.37906e-05	0	0	0	1.07581e-05	0	0	4.30325e-05	0	0	0	1.07581e-05	0	0	3.22744e-05	0	0	2.15163e-05	2.15163e-05	1.07581e-05	1.07581e-05	2.15163e-05	2.15163e-05	3.22744e-05	0	5.64802e-05	k__Bacteria;p__Proteobacteria;c__Betaproteobacteria;o__Burkholderiales;f__Burkholderiaceae;g__Burkholderia-Paraburkholderia;s__Burkholderia_cepacia;
Hymenobacter_sp._R-36552	0	0	0	0	0	0	1.07581e-05	0	0	0	0	3.22744e-05	0	0	2.15163e-05	0.00189343	1.07581e-05	0	0	0	0	0	0	0	0	1.07581e-05	0	0	0	0	0	0	0	0	0	0	5.4986e-05	k__Bacteria;p__Bacteroidetes;c__Cytophagia;o__Cytophagales;f__Cytophagaceae;g__Hymenobacter;s__Hymenobacter_sp._R-36552;
Bifidobacterium_thermophilum	0	0	1.07581e-05	2.15163e-05	0	0.00174282	0	0	0	0	4.30325e-05	0	0	0	1.07581e-05	0	0	0	0	0	0	3.22744e-05	0	0	0	1.07581e-05	1.07581e-05	1.07581e-05	0	0	0	5.37906e-05	1.07581e-05	0	0	0	5.43883e-05	k__Bacteria;p__Actinobacteria;c__unidentified_Actinobacteria;o__Bifidobacteriales;f__Bifidobacteriaceae;g__Bifidobacterium;s__Bifidobacterium_thermophilum;
Clostridium_pasteurianum	0	0	0	0	7.53069e-05	0	0	7.53069e-05	5.37906e-05	0.0011296	9.68231e-05	0.000139856	9.68231e-05	7.53069e-05	0	0	0	0	0	0	0	0	0	0	0	0	0	0	0	0	0	7.53069e-05	0	0	0	8.6065e-05	5.28941e-05	k__Bacteria;p__Firmicutes;c__Clostridia;o__Clostridiales;f__Clostridiaceae_1;g__Clostridium_sensu_stricto_12;s__Clostridium_pasteurianum;
Comamonas_testosteroni	0	0	2.15163e-05	0	0	0	2.15163e-05	0	0	0	0	0	0	0	0	0	0	0	0	0	0	0	0	0	0	0	0	0	1.07581e-05	0.00137704	1.07581e-05	2.15163e-05	1.07581e-05	1.07581e-05	0	4.30325e-05	4.24348e-05	k__Bacteria;p__Proteobacteria;c__Betaproteobacteria;o__Burkholderiales;f__Comamonadaceae;g__Comamonas;s__Comamonas_testosteroni;
Eubacterium_brachy	0	0	0.000935957	0	1.07581e-05	0	0	0	0	0	0	0	0	0	0	0	0	0	0	0	0	0	0	0	0	1.07581e-05	1.07581e-05	3.22744e-05	0	2.15163e-05	0	0	0	0	0	0	2.83895e-05	k__Bacteria;p__Firmicutes;c__Clostridia;o__Clostridiales;f__Family_XIII;g__[Eubacterium]_brachy_group;s__Eubacterium_brachy;
Sphingobacterium_thermophilum	0	0	0	0	0	0	0	0	0	0	0	0	0	0	0	0	0	0	0	0	0.00101126	0	0	0	0	0	0	0	0	0	0	0	0	0	0	0	2.80907e-05	k__Bacteria;p__Bacteroidetes;c__Sphingobacteriia;o__Sphingobacteriales;f__Sphingobacteriaceae;g__Sphingobacterium;s__Sphingobacterium_thermophilum;
Prevotella_oulorum	0	0	0	1.07581e-05	0	0	0	1.07581e-05	0.000785343	1.07581e-05	5.37906e-05	3.22744e-05	0	0	0	0	0	0	0	0	0	0	0	0	0	0	0	0	0	0	2.15163e-05	0	0	0	0	2.15163e-05	2.62976e-05	k__Bacteria;p__Bacteroidetes;c__Bacteroidia;o__Bacteroidales;f__Prevotellaceae;g__Prevotella;s__Prevotella_oulorum;
Xanthomonadaceae_bacterium_K-1-9	0	0	0	0	0	0	1.07581e-05	0	0	0	0	0	2.15163e-05	0	0	0	0	0	0	0	0	0	0	0	0	0	1.07581e-05	0	0	1.07581e-05	1.07581e-05	1.07581e-05	0	0.000623971	0	0	1.94244e-05	k__Bacteria;p__Proteobacteria;c__Gammaproteobacteria;o__Xanthomonadales;f__Xanthomonadaceae;g__unidentified_Xanthomonadaceae;s__Xanthomonadaceae_bacterium_K-1-9;
Jeotgalicoccus_sp._M3T9B12	0	0	2.15163e-05	0	0	0	0	0	1.07581e-05	2.15163e-05	1.07581e-05	2.15163e-05	1.07581e-05	0	0	0	0	0	0	0	0	0	0	0	0	0	0	0	0	7.53069e-05	0	0	0	0	0	0.00017213	9.56278e-06	k__Bacteria;p__Firmicutes;c__Bacilli;o__Bacillales;f__Staphylococcaceae;g__Jeotgalicoccus;s__Jeotgalicoccus_sp._M3T9B12;
Bacillus_racemilacticus	0	0	0	0	0	0	0	0	0	0	0	0	0	1.07581e-05	0	0	0	0	0	0	0	1.07581e-05	1.07581e-05	0.000301228	0	0	0	0	0	0	0	0	0	0	0	0	9.26394e-06	k__Bacteria;p__Firmicutes;c__Bacilli;o__Bacillales;f__Sporolactobacillaceae;g__unidentified_Sporolactobacillaceae;s__Bacillus_racemilacticus;
Actinomyces_sp._oral_clone_IO076	0	0	0	0	0	0	0	0	0	0	0	0	0	0	1.07581e-05	0	0.000247437	0	0	0	0	0	0	0	0	0	0	0	0	0	0	0	0	0	0	0	7.17208e-06	k__Bacteria;p__Actinobacteria;c__unidentified_Actinobacteria;o__Actinomycetales;f__Actinomycetaceae;g__unidentified_Actinomycetaceae;s__Actinomyces_sp._oral_clone_IO076;
Finegoldia_magna	0	2.15163e-05	0	0	0	0	0	0	0	1.07581e-05	3.22744e-05	0	5.37906e-05	0	2.15163e-05	0	1.07581e-05	1.07581e-05	0	0	0	1.07581e-05	1.07581e-05	0	0	0	2.15163e-05	2.15163e-05	0	1.07581e-05	0	0	0	1.07581e-05	1.07581e-05	0	7.17208e-06	k__Bacteria;p__Firmicutes;c__Clostridia;o__Clostridiales;f__Family_XI;g__Finegoldia;s__Finegoldia_magna;
Neisseria_oralis	0	0	4.30325e-05	0	0	0	0	0	0	2.15163e-05	2.15163e-05	2.15163e-05	1.07581e-05	0	0	0	0	0	0	0	0	0	0	0	0	0	0	0	0	1.07581e-05	0	0	0	0	0	0.000107581	6.57441e-06	k__Bacteria;p__Proteobacteria;c__Betaproteobacteria;o__Neisseriales;f__Neisseriaceae;g__Neisseria;s__Neisseria_oralis;
Kocuria_kristinae	0	0	0	0	0	0	1.07581e-05	0	0	0	0	3.22744e-05	0	0	7.53069e-05	1.07581e-05	0	0	3.22744e-05	0	0	3.22744e-05	1.07581e-05	0	0	1.07581e-05	0	0	0	0	0	0	0	0	0	0	5.97674e-06	k__Bacteria;p__Actinobacteria;c__unidentified_Actinobacteria;o__Micrococcales;f__Micrococcaceae;g__Kocuria;s__Kocuria_kristinae;
Lactobacillus_brevis	0	0	1.07581e-05	0	0	0	0	0	0	1.07581e-05	0	2.15163e-05	2.15163e-05	0	0	0	0	0	0	0	0	0	0	0	0	0	0	0	0	1.07581e-05	0	0	0	0	0	0.000107581	5.08023e-06	k__Bacteria;p__Firmicutes;c__Bacilli;o__Lactobacillales;f__Lactobacillaceae;g__Lactobacillus;s__Lactobacillus_brevis;
Luteimonas_aestuarii	0	0	0	0	0	0	0	0	0	0	0	0	0	0	0	0	0	0	0	0	0	0	0	0	0	0	1.07581e-05	0	1.07581e-05	0	1.07581e-05	1.07581e-05	2.15163e-05	9.68231e-05	0	0	4.48255e-06	k__Bacteria;p__Proteobacteria;c__Gammaproteobacteria;o__Xanthomonadales;f__Xanthomonadaceae;g__Luteimonas;s__Luteimonas_aestuarii;
Actinomyces_sp._oral_taxon_414	0	0	0	2.15163e-05	0	0	0	0	8.6065e-05	1.07581e-05	1.07581e-05	1.07581e-05	0	0	0	0	0	0	0	0	0	0	0	0	0	0	0	0	0	0	1.07581e-05	0	0	0	0	0	4.18372e-06	k__Bacteria;p__Actinobacteria;c__unidentified_Actinobacteria;o__Actinomycetales;f__Actinomycetaceae;g__Actinomyces;s__Actinomyces_sp._oral_taxon_414;
Propionibacterium_sp._canine_oral_taxon_431	0	0	0	0	0	0	0	0	0	0	0	0	0	0	0	0	0	0	0	0	0	0	0	0.000107581	0	0	0	0	0	0	0	0	0	0	0	0	2.98837e-06	k__Bacteria;p__Actinobacteria;c__unidentified_Actinobacteria;o__Propionibacteriales;f__Propionibacteriaceae;g__Propionibacterium;s__Propionibacterium_sp._canine_oral_taxon_431;
Enterococcus_cecorum	0	0	0	0	0	0	0	0	0	0	0	0	0	0	0	0	8.6065e-05	0	0	0	0	0	0	0	0	0	0	0	0	0	0	0	0	0	0	0	2.39069e-06	k__Bacteria;p__Firmicutes;c__Bacilli;o__Lactobacillales;f__Enterococcaceae;g__Enterococcus;s__Enterococcus_cecorum;
Capnocytophaga_sputigena	0	8.6065e-05	0	0	0	0	0	0	0	0	0	0	0	0	0	0	0	0	0	0	0	0	0	0	0	0	0	0	0	0	0	0	0	0	0	0	2.39069e-06	k__Bacteria;p__Bacteroidetes;c__Flavobacteriia;o__Flavobacteriales;f__Flavobacteriaceae;g__Capnocytophaga;s__Capnocytophaga_sputigena;
Idiomarina_tainanensis	1.07581e-05	0	0	0	0	0	0	0	0	0	0	0	0	0	0	0	0	0	0	0	4.30325e-05	0	0	0	0	0	0	0	0	0	0	0	0	0	0	0	1.49418e-06	k__Bacteria;p__Proteobacteria;c__Gammaproteobacteria;o__Alteromonadales;f__Idiomarinaceae;g__Idiomarina;s__Idiomarina_tainanensis;
Halomonas_xianhensis	0	0	1.07581e-05	0	0	0	0	0	0	0	0	0	0	0	3.22744e-05	0	1.07581e-05	0	0	0	0	0	0	0	0	0	0	0	0	0	0	0	0	0	0	0	1.49418e-06	k__Bacteria;p__Proteobacteria;c__Gammaproteobacteria;o__Oceanospirillales;f__Halomonadaceae;g__Halomonas;s__Halomonas_xianhensis;
Veillonella_atypica	0	0	0	0	0	0	0	0	0	0	1.07581e-05	0	1.07581e-05	0	0	0	0	0	0	0	0	0	0	0	0	0	0	0	0	0	0	0	0	0	0	0	5.97674e-07	k__Bacteria;p__Firmicutes;c__Negativicutes;o__Selenomonadales;f__Veillonellaceae;g__Veillonella;s__Veillonella_atypica;
Rhizobium_sp._NT-26	0	0	0	0	0	0	0	0	0	0	0	0	0	0	0	0	0	0	0	0	2.15163e-05	0	0	0	0	0	0	0	0	0	0	0	0	0	0	0	5.97674e-07	k__Bacteria;p__Proteobacteria;c__Alphaproteobacteria;o__Rhizobiales;f__Rhizobiaceae;g__Rhizobium;s__Rhizobium_sp._NT-26;
Corynebacterium_riegelii	2.15163e-05	0	0	0	0	0	0	0	0	0	0	0	0	0	0	0	0	0	0	0	0	0	0	0	0	0	0	0	0	0	0	0	0	0	0	0	5.97674e-07	k__Bacteria;p__Actinobacteria;c__unidentified_Actinobacteria;o__Corynebacteriales;f__Corynebacteriaceae;g__Corynebacterium_1;s__Corynebacterium_riegelii;
Vibrio_fluvialis	2.15163e-05	0	0	0	0	0	0	0	0	0	0	0	0	0	0	0	0	0	0	0	0	0	0	0	0	0	0	0	0	0	0	0	0	0	0	0	5.97674e-07	k__Bacteria;p__Proteobacteria;c__Gammaproteobacteria;o__Vibrionales;f__Vibrionaceae;g__Vibrio;s__Vibrio_fluvialis;
Brevundimonas_kwangchunensis	0	0	0	0	0	0	0	0	0	0	0	0	0	0	0	0	0	0	0	0	0	0	0	0	0	0	0	2.15163e-05	0	0	0	0	0	0	0	0	5.97674e-07	k__Bacteria;p__Proteobacteria;c__Alphaproteobacteria;o__Caulobacterales;f__Caulobacteraceae;g__Brevundimonas;s__Brevundimonas_kwangchunensis;
Mycobacterium_gordonae	0	0	0	0	0	0	0	0	0	0	0	0	0	0	0	0	0	0	0	0	2.15163e-05	0	0	0	0	0	0	0	0	0	0	0	0	0	0	0	5.97674e-07	k__Bacteria;p__Actinobacteria;c__unidentified_Actinobacteria;o__Corynebacteriales;f__Mycobacteriaceae;g__Mycobacterium;s__Mycobacterium_gordonae;
Capnocytophaga_sp.	0	0	0	0	0	0	0	0	0	0	0	0	0	0	0	0	0	0	0	0	0	0	0	0	0	0	0	0	0	2.15163e-05	0	0	0	0	0	0	5.97674e-07	k__Bacteria;p__Bacteroidetes;c__Flavobacteriia;o__Flavobacteriales;f__Flavobacteriaceae;g__Capnocytophaga;s__Capnocytophaga_sp.;
Treponema_sp._canine_oral_taxon_087	0	0	0	0	0	0	0	0	0	0	0	0	0	0	1.07581e-05	0	0	0	0	0	0	0	0	0	0	0	0	0	0	0	0	0	0	0	0	0	2.98837e-07	k__Bacteria;p__Spirochaetes;c__unidentified_Spirochaetes;o__Spirochaetales;f__Spirochaetaceae;g__Treponema_2;s__Treponema_sp._canine_oral_taxon_087;
Thermus_thermophilus	0	0	0	0	0	0	0	0	0	0	0	1.07581e-05	0	0	0	0	0	0	0	0	0	0	0	0	0	0	0	0	0	0	0	0	0	0	0	0	2.98837e-07	k__Bacteria;p__Deinococcus-Thermus;c__Deinococci;o__Thermales;f__Thermaceae;g__Thermus;s__Thermus_thermophilus;
Porphyromonas_gingivalis	0	0	0	0	0	0	0	0	0	0	0	0	0	0	0	0	0	0	0	0	0	0	0	0	0	0	0	0	0	0	0	0	0	0	0	0	0	k__Bacteria;p__Bacteroidetes;c__Bacteroidia;o__Bacteroidales;f__Porphyromonadaceae;g__Porphyromonas;s__Porphyromonas_gingivalis;
SR1_bacterium_oral_taxon_875	0	0	0	0	0	0	0	0	0	0	0	0	0	0	0	0	0	0	0	0	0	0	0	0	0	0	0	0	0	0	0	0	0	0	0	0	0	k__Bacteria;p__SR1_(Absconditabacteria);c__unidentified_SR1_(Absconditabacteria);o__unidentified_SR1_(Absconditabacteria);f__unidentified_SR1_(Absconditabacteria);g__unidentified_SR1_(Absconditabacteria);s__SR1_bacterium_oral_taxon_875;
Alloprevotella_rava	0	0	0	0	0	0	0	0	0	0	0	0	0	0	0	0	0	0	0	0	0	0	0	0	0	0	0	0	0	0	0	0	0	0	0	0	0	k__Bacteria;p__Bacteroidetes;c__Bacteroidia;o__Bacteroidales;f__Prevotellaceae;g__Alloprevotella;s__Alloprevotella_rava;
Prevotella_sp.	0	0	0	0	0	0	0	0	0	0	0	0	0	0	0	0	0	0	0	0	0	0	0	0	0	0	0	0	0	0	0	0	0	0	0	0	0	k__Bacteria;p__Bacteroidetes;c__Bacteroidia;o__Bacteroidales;f__Prevotellaceae;g__Prevotella_1;s__Prevotella_sp.;
Leptotrichia_sp._oral_clone_EI013	0	0	0	0	0	0	0	0	0	0	0	0	0	0	0	0	0	0	0	0	0	0	0	0	0	0	0	0	0	0	0	0	0	0	0	0	0	k__Bacteria;p__Fusobacteria;c__Fusobacteriia;o__Fusobacteriales;f__Leptotrichiaceae;g__Leptotrichia;s__Leptotrichia_sp._oral_clone_EI013;
Eubacterium_sp._oral_clone_DO008	0	0	0	0	0	0	0	0	0	0	0	0	0	0	0	0	0	0	0	0	0	0	0	0	0	0	0	0	0	0	0	0	0	0	0	0	0	k__Bacteria;p__Firmicutes;c__Clostridia;o__Clostridiales;f__Lachnospiraceae;g__unidentified_Lachnospiraceae;s__Eubacterium_sp._oral_clone_DO008;
Porphyromonas_endodontalis	0	0	0	0	0	0	0	0	0	0	0	0	0	0	0	0	0	0	0	0	0	0	0	0	0	0	0	0	0	0	0	0	0	0	0	0	0	k__Bacteria;p__Bacteroidetes;c__Bacteroidia;o__Bacteroidales;f__Porphyromonadaceae;g__Porphyromonas;s__Porphyromonas_endodontalis;
Bacteroides_fragilis	0	0	0	0	0	0	0	0	0	0	0	0	0	0	0	0	0	0	0	0	0	0	0	0	0	0	0	0	0	0	0	0	0	0	0	0	0	k__Bacteria;p__Bacteroidetes;c__Bacteroidia;o__Bacteroidales;f__Bacteroidaceae;g__Bacteroides;s__Bacteroides_fragilis;
Campylobacter_showae	0	0	0	0	0	0	0	0	0	0	0	0	0	0	0	0	0	0	0	0	0	0	0	0	0	0	0	0	0	0	0	0	0	0	0	0	0	k__Bacteria;p__Proteobacteria;c__Epsilonproteobacteria;o__Campylobacterales;f__Campylobacteraceae;g__Campylobacter;s__Campylobacter_showae;
Lactobacillus_reuteri	0	0	0	0	0	0	0	0	0	0	0	0	0	0	0	0	0	0	0	0	0	0	0	0	0	0	0	0	0	0	0	0	0	0	0	0	0	k__Bacteria;p__Firmicutes;c__Bacilli;o__Lactobacillales;f__Lactobacillaceae;g__Lactobacillus;s__Lactobacillus_reuteri;
Prevotella_baroniae	0	0	0	0	0	0	0	0	0	0	0	0	0	0	0	0	0	0	0	0	0	0	0	0	0	0	0	0	0	0	0	0	0	0	0	0	0	k__Bacteria;p__Bacteroidetes;c__Bacteroidia;o__Bacteroidales;f__Prevotellaceae;g__Prevotella_7;s__Prevotella_baroniae;
Lactobacillus_salivarius	0	0	0	0	0	0	0	0	0	0	0	0	0	0	0	0	0	0	0	0	0	0	0	0	0	0	0	0	0	0	0	0	0	0	0	0	0	k__Bacteria;p__Firmicutes;c__Bacilli;o__Lactobacillales;f__Lactobacillaceae;g__Lactobacillus;s__Lactobacillus_salivarius;
Tannerella_forsythia	0	0	0	0	0	0	0	0	0	0	0	0	0	0	0	0	0	0	0	0	0	0	0	0	0	0	0	0	0	0	0	0	0	0	0	0	0	k__Bacteria;p__Bacteroidetes;c__Bacteroidia;o__Bacteroidales;f__Porphyromonadaceae;g__Tannerella;s__Tannerella_forsythia;
Phocaeicola_abscessus	0	0	0	0	0	0	0	0	0	0	0	0	0	0	0	0	0	0	0	0	0	0	0	0	0	0	0	0	0	0	0	0	0	0	0	0	0	k__Bacteria;p__Bacteroidetes;c__Bacteroidia;o__Bacteroidales;f__unidentified_Bacteroidales;g__Phocaeicola;s__Phocaeicola_abscessus;
Eubacterium_sp._oral_clone_GI038	0	0	0	0	0	0	0	0	0	0	0	0	0	0	0	0	0	0	0	0	0	0	0	0	0	0	0	0	0	0	0	0	0	0	0	0	0	k__Bacteria;p__Firmicutes;c__Clostridia;o__Clostridiales;f__Lachnospiraceae;g__Butyrivibrio_2;s__Eubacterium_sp._oral_clone_GI038;
Prevotella_sp._oral_clone_DO014	0	0	0	0	0	0	0	0	0	0	0	0	0	0	0	0	0	0	0	0	0	0	0	0	0	0	0	0	0	0	0	0	0	0	0	0	0	k__Bacteria;p__Bacteroidetes;c__Bacteroidia;o__Bacteroidales;f__Prevotellaceae;g__Prevotella_7;s__Prevotella_sp._oral_clone_DO014;
Neisseria_bacilliformis	0	0	0	0	0	0	0	0	0	0	0	0	0	0	0	0	0	0	0	0	0	0	0	0	0	0	0	0	0	0	0	0	0	0	0	0	0	k__Bacteria;p__Proteobacteria;c__Betaproteobacteria;o__Neisseriales;f__Neisseriaceae;g__Neisseria;s__Neisseria_bacilliformis;
Roseburia_inulinivorans	0	0	0	0	0	0	0	0	0	0	0	0	0	0	0	0	0	0	0	0	0	0	0	0	0	0	0	0	0	0	0	0	0	0	0	0	0	k__Bacteria;p__Firmicutes;c__Clostridia;o__Clostridiales;f__Lachnospiraceae;g__Roseburia;s__Roseburia_inulinivorans;
Prevotella_dentalis	0	0	0	0	0	0	0	0	0	0	0	0	0	0	0	0	0	0	0	0	0	0	0	0	0	0	0	0	0	0	0	0	0	0	0	0	0	k__Bacteria;p__Bacteroidetes;c__Bacteroidia;o__Bacteroidales;f__Prevotellaceae;g__Prevotella_7;s__Prevotella_dentalis;
Zobellella_taiwanensis	0	0	0	0	0	0	0	0	0	0	0	0	0	0	0	0	0	0	0	0	0	0	0	0	0	0	0	0	0	0	0	0	0	0	0	0	0	k__Bacteria;p__Proteobacteria;c__Gammaproteobacteria;o__Aeromonadales;f__Aeromonadaceae;g__Zobellella;s__Zobellella_taiwanensis;
Porphyromonas-like_sp._oral_clone_DA064	0	0	0	0	0	0	0	0	0	0	0	0	0	0	0	0	0	0	0	0	0	0	0	0	0	0	0	0	0	0	0	0	0	0	0	0	0	k__Bacteria;p__Bacteroidetes;c__Bacteroidia;o__Bacteroidales;f__Rikenellaceae;g__Rikenellaceae_RC9_gut_group;s__Porphyromonas-like_sp._oral_clone_DA064;
Alloscardovia_omnicolens	0	0	0	0	0	0	0	0	0	0	0	0	0	0	0	0	0	0	0	0	0	0	0	0	0	0	0	0	0	0	0	0	0	0	0	0	0	k__Bacteria;p__Actinobacteria;c__unidentified_Actinobacteria;o__Bifidobacteriales;f__Bifidobacteriaceae;g__Alloscardovia;s__Alloscardovia_omnicolens;
Pseudomonas_psychrotolerans	0	0	0	0	0	0	0	0	0	0	0	0	0	0	0	0	0	0	0	0	0	0	0	0	0	0	0	0	0	0	0	0	0	0	0	0	0	k__Bacteria;p__Proteobacteria;c__Gammaproteobacteria;o__Pseudomonadales;f__Pseudomonadaceae;g__Pseudomonas;s__Pseudomonas_psychrotolerans;
Rheinheimera_aquimaris	0	0	0	0	0	0	0	0	0	0	0	0	0	0	0	0	0	0	0	0	0	0	0	0	0	0	0	0	0	0	0	0	0	0	0	0	0	k__Bacteria;p__Proteobacteria;c__Gammaproteobacteria;o__Chromatiales;f__Chromatiaceae;g__Rheinheimera;s__Rheinheimera_aquimaris;
Streptococcus_mutans	0	0	0	0	0	0	0	0	0	0	0	0	0	0	0	0	0	0	0	0	0	0	0	0	0	0	0	0	0	0	0	0	0	0	0	0	0	k__Bacteria;p__Firmicutes;c__Bacilli;o__Lactobacillales;f__Streptococcaceae;g__Streptococcus;s__Streptococcus_mutans;
Pedobacter_agri	0	0	0	0	0	0	0	0	0	0	0	0	0	0	0	0	0	0	0	0	0	0	0	0	0	0	0	0	0	0	0	0	0	0	0	0	0	k__Bacteria;p__Bacteroidetes;c__Sphingobacteriia;o__Sphingobacteriales;f__Sphingobacteriaceae;g__Pedobacter;s__Pedobacter_agri;
Bacteroidales_genomosp._P4_oral_clone_MB2_G17	0	0	0	0	0	0	0	0	0	0	0	0	0	0	0	0	0	0	0	0	0	0	0	0	0	0	0	0	0	0	0	0	0	0	0	0	0	k__Bacteria;p__Bacteroidetes;c__Sphingobacteriia;o__Sphingobacteriales;f__Lentimicrobiaceae;g__unidentified_Lentimicrobiaceae;s__Bacteroidales_genomosp._P4_oral_clone_MB2_G17;
Treponema_sp._3:G:BB003	0	0	0	0	0	0	0	0	0	0	0	0	0	0	0	0	0	0	0	0	0	0	0	0	0	0	0	0	0	0	0	0	0	0	0	0	0	k__Bacteria;p__Spirochaetes;c__unidentified_Spirochaetes;o__Spirochaetales;f__Spirochaetaceae;g__Treponema_2;s__Treponema_sp._3:G:BB003;
Prevotella_intermedia	0	0	0	0	0	0	0	0	0	0	0	0	0	0	0	0	0	0	0	0	0	0	0	0	0	0	0	0	0	0	0	0	0	0	0	0	0	k__Bacteria;p__Bacteroidetes;c__Bacteroidia;o__Bacteroidales;f__Prevotellaceae;g__Prevotella;s__Prevotella_intermedia;
Aggregatibacter_actinomycetemcomitans	0	0	0	0	0	0	0	0	0	0	0	0	0	0	0	0	0	0	0	0	0	0	0	0	0	0	0	0	0	0	0	0	0	0	0	0	0	k__Bacteria;p__Proteobacteria;c__Gammaproteobacteria;o__Pasteurellales;f__Pasteurellaceae;g__Aggregatibacter;s__Aggregatibacter_actinomycetemcomitans;
Prevotella_sp._oral_clone_FW035	0	0	0	0	0	0	0	0	0	0	0	0	0	0	0	0	0	0	0	0	0	0	0	0	0	0	0	0	0	0	0	0	0	0	0	0	0	k__Bacteria;p__Bacteroidetes;c__Bacteroidia;o__Bacteroidales;f__Prevotellaceae;g__Prevotella_7;s__Prevotella_sp._oral_clone_FW035;
Prevotella_sp._canine_oral_taxon_195	0	0	0	0	0	0	0	0	0	0	0	0	0	0	0	0	0	0	0	0	0	0	0	0	0	0	0	0	0	0	0	0	0	0	0	0	0	k__Bacteria;p__Bacteroidetes;c__Bacteroidia;o__Bacteroidales;f__Prevotellaceae;g__Prevotella_7;s__Prevotella_sp._canine_oral_taxon_195;
Treponema_lecithinolyticum	0	0	0	0	0	0	0	0	0	0	0	0	0	0	0	0	0	0	0	0	0	0	0	0	0	0	0	0	0	0	0	0	0	0	0	0	0	k__Bacteria;p__Spirochaetes;c__unidentified_Spirochaetes;o__Spirochaetales;f__Spirochaetaceae;g__Treponema_2;s__Treponema_lecithinolyticum;
Prevotella_sp._oral_clone_P4PB_83_P2	0	0	0	0	0	0	0	0	0	0	0	0	0	0	0	0	0	0	0	0	0	0	0	0	0	0	0	0	0	0	0	0	0	0	0	0	0	k__Bacteria;p__Bacteroidetes;c__Bacteroidia;o__Bacteroidales;f__Prevotellaceae;g__Prevotella_7;s__Prevotella_sp._oral_clone_P4PB_83_P2;
Dialister_pneumosintes	0	0	0	0	0	0	0	0	0	0	0	0	0	0	0	0	0	0	0	0	0	0	0	0	0	0	0	0	0	0	0	0	0	0	0	0	0	k__Bacteria;p__Firmicutes;c__Negativicutes;o__Selenomonadales;f__Veillonellaceae;g__Dialister;s__Dialister_pneumosintes;
Prevotella_sp._oral_clone_IK053	0	0	0	0	0	0	0	0	0	0	0	0	0	0	0	0	0	0	0	0	0	0	0	0	0	0	0	0	0	0	0	0	0	0	0	0	0	k__Bacteria;p__Bacteroidetes;c__Bacteroidia;o__Bacteroidales;f__Prevotellaceae;g__Prevotella_2;s__Prevotella_sp._oral_clone_IK053;
Pedobacter_duraquae	0	0	0	0	0	0	0	0	0	0	0	0	0	0	0	0	0	0	0	0	0	0	0	0	0	0	0	0	0	0	0	0	0	0	0	0	0	k__Bacteria;p__Bacteroidetes;c__Sphingobacteriia;o__Sphingobacteriales;f__Sphingobacteriaceae;g__Pedobacter;s__Pedobacter_duraquae;
Prevotella_sp._E7_34	0	0	0	0	0	0	0	0	0	0	0	0	0	0	0	0	0	0	0	0	0	0	0	0	0	0	0	0	0	0	0	0	0	0	0	0	0	k__Bacteria;p__Bacteroidetes;c__Bacteroidia;o__Bacteroidales;f__Prevotellaceae;g__Prevotella_7;s__Prevotella_sp._E7_34;
Sphingobacterium_multivorum	0	0	0	0	0	0	0	0	0	0	0	0	0	0	0	0	0	0	0	0	0	0	0	0	0	0	0	0	0	0	0	0	0	0	0	0	0	k__Bacteria;p__Bacteroidetes;c__Sphingobacteriia;o__Sphingobacteriales;f__Sphingobacteriaceae;g__Sphingobacterium;s__Sphingobacterium_multivorum;
Streptococcus_agalactiae	0	0	0	0	0	0	0	0	0	0	0	0	0	0	0	0	0	0	0	0	0	0	0	0	0	0	0	0	0	0	0	0	0	0	0	0	0	k__Bacteria;p__Firmicutes;c__Bacilli;o__Lactobacillales;f__Streptococcaceae;g__Streptococcus;s__Streptococcus_agalactiae;
Desulfovibrio_sp._Dsv1	0	0	0	0	0	0	0	0	0	0	0	0	0	0	0	0	0	0	0	0	0	0	0	0	0	0	0	0	0	0	0	0	0	0	0	0	0	k__Bacteria;p__Proteobacteria;c__Deltaproteobacteria;o__Desulfovibrionales;f__Desulfovibrionaceae;g__Desulfovibrio;s__Desulfovibrio_sp._Dsv1;
Bacteroides_uniformis	0	0	0	0	0	0	0	0	0	0	0	0	0	0	0	0	0	0	0	0	0	0	0	0	0	0	0	0	0	0	0	0	0	0	0	0	0	k__Bacteria;p__Bacteroidetes;c__Bacteroidia;o__Bacteroidales;f__Bacteroidaceae;g__Bacteroides;s__Bacteroides_uniformis;
Bacteroides_caccae	0	0	0	0	0	0	0	0	0	0	0	0	0	0	0	0	0	0	0	0	0	0	0	0	0	0	0	0	0	0	0	0	0	0	0	0	0	k__Bacteria;p__Bacteroidetes;c__Bacteroidia;o__Bacteroidales;f__Bacteroidaceae;g__Bacteroides;s__Bacteroides_caccae;
Lactobacillus_gasseri	0	0	0	0	0	0	0	0	0	0	0	0	0	0	0	0	0	0	0	0	0	0	0	0	0	0	0	0	0	0	0	0	0	0	0	0	0	k__Bacteria;p__Firmicutes;c__Bacilli;o__Lactobacillales;f__Lactobacillaceae;g__Lactobacillus;s__Lactobacillus_gasseri;
Nocardioides_ginsengagri	0	0	0	0	0	0	0	0	0	0	0	0	0	0	0	0	0	0	0	0	0	0	0	0	0	0	0	0	0	0	0	0	0	0	0	0	0	k__Bacteria;p__Actinobacteria;c__unidentified_Actinobacteria;o__Propionibacteriales;f__Nocardioidaceae;g__Nocardioides;s__Nocardioides_ginsengagri;
Dialister_micraerophilus	0	0	0	0	0	0	0	0	0	0	0	0	0	0	0	0	0	0	0	0	0	0	0	0	0	0	0	0	0	0	0	0	0	0	0	0	0	k__Bacteria;p__Firmicutes;c__Negativicutes;o__Selenomonadales;f__Veillonellaceae;g__Dialister;s__Dialister_micraerophilus;
Leptotrichia_goodfellowii	0	0	0	0	0	0	0	0	0	0	0	0	0	0	0	0	0	0	0	0	0	0	0	0	0	0	0	0	0	0	0	0	0	0	0	0	0	k__Bacteria;p__Fusobacteria;c__Fusobacteriia;o__Fusobacteriales;f__Leptotrichiaceae;g__Leptotrichia;s__Leptotrichia_goodfellowii;
Flavobacterium_resistens	0	0	0	0	0	0	0	0	0	0	0	0	0	0	0	0	0	0	0	0	0	0	0	0	0	0	0	0	0	0	0	0	0	0	0	0	0	k__Bacteria;p__Bacteroidetes;c__Flavobacteriia;o__Flavobacteriales;f__Flavobacteriaceae;g__Flavobacterium;s__Flavobacterium_resistens;
Achromobacter_piechaudii	0	0	0	0	0	0	0	0	0	0	0	0	0	0	0	0	0	0	0	0	0	0	0	0	0	0	0	0	0	0	0	0	0	0	0	0	0	k__Bacteria;p__Proteobacteria;c__Betaproteobacteria;o__Burkholderiales;f__Alcaligenaceae;g__Achromobacter;s__Achromobacter_piechaudii;
Lysinibacillus_sp._JLT12	0	0	0	0	0	0	0	0	0	0	0	0	0	0	0	0	0	0	0	0	0	0	0	0	0	0	0	0	0	0	0	0	0	0	0	0	0	k__Bacteria;p__Firmicutes;c__Bacilli;o__Bacillales;f__Planococcaceae;g__Lysinibacillus;s__Lysinibacillus_sp._JLT12;
Agromyces_ramosus	0	0	0	0	0	0	0	0	0	0	0	0	0	0	0	0	0	0	0	0	0	0	0	0	0	0	0	0	0	0	0	0	0	0	0	0	0	k__Bacteria;p__Actinobacteria;c__unidentified_Actinobacteria;o__Micrococcales;f__Microbacteriaceae;g__Agromyces;s__Agromyces_ramosus;
Treponema_parvum	0	0	0	0	0	0	0	0	0	0	0	0	0	0	0	0	0	0	0	0	0	0	0	0	0	0	0	0	0	0	0	0	0	0	0	0	0	k__Bacteria;p__Spirochaetes;c__unidentified_Spirochaetes;o__Spirochaetales;f__Spirochaetaceae;g__Treponema_2;s__Treponema_parvum;
Marinobacter_hydrocarbonoclasticus	0	0	0	0	0	0	0	0	0	0	0	0	0	0	0	0	0	0	0	0	0	0	0	0	0	0	0	0	0	0	0	0	0	0	0	0	0	k__Bacteria;p__Proteobacteria;c__Gammaproteobacteria;o__Alteromonadales;f__Alteromonadaceae;g__Marinobacter;s__Marinobacter_hydrocarbonoclasticus;
Prevotella_saccharolytica	0	0	0	0	0	0	0	0	0	0	0	0	0	0	0	0	0	0	0	0	0	0	0	0	0	0	0	0	0	0	0	0	0	0	0	0	0	k__Bacteria;p__Bacteroidetes;c__Bacteroidia;o__Bacteroidales;f__Prevotellaceae;g__Prevotella_2;s__Prevotella_saccharolytica;
Campylobacter_ureolyticus	0	0	0	0	0	0	0	0	0	0	0	0	0	0	0	0	0	0	0	0	0	0	0	0	0	0	0	0	0	0	0	0	0	0	0	0	0	k__Bacteria;p__Proteobacteria;c__Epsilonproteobacteria;o__Campylobacterales;f__Campylobacteraceae;g__Campylobacter;s__Campylobacter_ureolyticus;
Prevotella_aurantiaca	0	0	0	0	0	0	0	0	0	0	0	0	0	0	0	0	0	0	0	0	0	0	0	0	0	0	0	0	0	0	0	0	0	0	0	0	0	k__Bacteria;p__Bacteroidetes;c__Bacteroidia;o__Bacteroidales;f__Prevotellaceae;g__Prevotella;s__Prevotella_aurantiaca;
Moryella_indoligenes	0	0	0	0	0	0	0	0	0	0	0	0	0	0	0	0	0	0	0	0	0	0	0	0	0	0	0	0	0	0	0	0	0	0	0	0	0	k__Bacteria;p__Firmicutes;c__Clostridia;o__Clostridiales;f__Lachnospiraceae;g__Moryella;s__Moryella_indoligenes;
Mesorhizobium_amorphae	0	0	0	0	0	0	0	0	0	0	0	0	0	0	0	0	0	0	0	0	0	0	0	0	0	0	0	0	0	0	0	0	0	0	0	0	0	k__Bacteria;p__Proteobacteria;c__Alphaproteobacteria;o__Rhizobiales;f__Phyllobacteriaceae;g__Mesorhizobium;s__Mesorhizobium_amorphae;
Prevotella_oralis	0	0	0	0	0	0	0	0	0	0	0	0	0	0	0	0	0	0	0	0	0	0	0	0	0	0	0	0	0	0	0	0	0	0	0	0	0	k__Bacteria;p__Bacteroidetes;c__Bacteroidia;o__Bacteroidales;f__Prevotellaceae;g__Prevotella;s__Prevotella_oralis;
Leptotrichia_sp._oral_clone_EI022	0	0	0	0	0	0	0	0	0	0	0	0	0	0	0	0	0	0	0	0	0	0	0	0	0	0	0	0	0	0	0	0	0	0	0	0	0	k__Bacteria;p__Fusobacteria;c__Fusobacteriia;o__Fusobacteriales;f__Leptotrichiaceae;g__Leptotrichia;s__Leptotrichia_sp._oral_clone_EI022;
Treponema_sp._5:C:AT040	0	0	0	0	0	0	0	0	0	0	0	0	0	0	0	0	0	0	0	0	0	0	0	0	0	0	0	0	0	0	0	0	0	0	0	0	0	k__Bacteria;p__Spirochaetes;c__unidentified_Spirochaetes;o__Spirochaetales;f__Spirochaetaceae;g__Treponema_2;s__Treponema_sp._5:C:AT040;
Treponema_sp._canine_oral_taxon_356	0	0	0	0	0	0	0	0	0	0	0	0	0	0	0	0	0	0	0	0	0	0	0	0	0	0	0	0	0	0	0	0	0	0	0	0	0	k__Bacteria;p__Spirochaetes;c__unidentified_Spirochaetes;o__Spirochaetales;f__Spirochaetaceae;g__Treponema_2;s__Treponema_sp._canine_oral_taxon_356;
Blautia_producta	0	0	0	0	0	0	0	0	0	0	0	0	0	0	0	0	0	0	0	0	0	0	0	0	0	0	0	0	0	0	0	0	0	0	0	0	0	k__Bacteria;p__Firmicutes;c__Clostridia;o__Clostridiales;f__Lachnospiraceae;g__Blautia;s__Blautia_producta;
Rhodococcus_sp._A2-608	0	0	0	0	0	0	0	0	0	0	0	0	0	0	0	0	0	0	0	0	0	0	0	0	0	0	0	0	0	0	0	0	0	0	0	0	0	k__Bacteria;p__Actinobacteria;c__unidentified_Actinobacteria;o__Corynebacteriales;f__Nocardiaceae;g__Rhodococcus;s__Rhodococcus_sp._A2-608;
Ottowia_sp._oral_taxon_894	0	0	0	0	0	0	0	0	0	0	0	0	0	0	0	0	0	0	0	0	0	0	0	0	0	0	0	0	0	0	0	0	0	0	0	0	0	k__Bacteria;p__Proteobacteria;c__Betaproteobacteria;o__Burkholderiales;f__Comamonadaceae;g__Comamonas;s__Ottowia_sp._oral_taxon_894;
Cupriavidus_gilardii	0	0	0	0	0	0	0	0	0	0	0	0	0	0	0	0	0	0	0	0	0	0	0	0	0	0	0	0	0	0	0	0	0	0	0	0	0	k__Bacteria;p__Proteobacteria;c__Betaproteobacteria;o__Burkholderiales;f__Burkholderiaceae;g__Cupriavidus;s__Cupriavidus_gilardii;
Mycoplasmataceae_genomosp._P1_oral_clone_MB1_G23	0	0	0	0	0	0	0	0	0	0	0	0	0	0	0	0	0	0	0	0	0	0	0	0	0	0	0	0	0	0	0	0	0	0	0	0	0	k__Bacteria;p__Tenericutes;c__Mollicutes;o__Acholeplasmatales;f__Acholeplasmataceae;g__Acholeplasma;s__Mycoplasmataceae_genomosp._P1_oral_clone_MB1_G23;
Prevotella_bivia	0	0	0	0	0	0	0	0	0	0	0	0	0	0	0	0	0	0	0	0	0	0	0	0	0	0	0	0	0	0	0	0	0	0	0	0	0	k__Bacteria;p__Bacteroidetes;c__Bacteroidia;o__Bacteroidales;f__Prevotellaceae;g__Prevotella;s__Prevotella_bivia;
Acinetobacter_bohemicus	0	0	0	0	0	0	0	0	0	0	0	0	0	0	0	0	0	0	0	0	0	0	0	0	0	0	0	0	0	0	0	0	0	0	0	0	0	k__Bacteria;p__Proteobacteria;c__Gammaproteobacteria;o__Pseudomonadales;f__Moraxellaceae;g__Acinetobacter;s__Acinetobacter_bohemicus;
Bacillus_anthracis	0	0	0	0	0	0	0	0	0	0	0	0	0	0	0	0	0	0	0	0	0	0	0	0	0	0	0	0	0	0	0	0	0	0	0	0	0	k__Bacteria;p__Firmicutes;c__Bacilli;o__Bacillales;f__Bacillaceae;g__Bacillus;s__Bacillus_anthracis;
Bacteroidales_oral_clone_MCE7_164	0	0	0	0	0	0	0	0	0	0	0	0	0	0	0	0	0	0	0	0	0	0	0	0	0	0	0	0	0	0	0	0	0	0	0	0	0	k__Bacteria;p__Bacteroidetes;c__Bacteroidia;o__Bacteroidales;f__Rikenellaceae;g__Rikenellaceae_RC9_gut_group;s__Bacteroidales_oral_clone_MCE7_164;
Alcanivorax_indicus	0	0	0	0	0	0	0	0	0	0	0	0	0	0	0	0	0	0	0	0	0	0	0	0	0	0	0	0	0	0	0	0	0	0	0	0	0	k__Bacteria;p__Proteobacteria;c__Gammaproteobacteria;o__Oceanospirillales;f__Alcanivoracaceae;g__Alcanivorax;s__Alcanivorax_indicus;
Alcaligenes_faecalis	0	0	0	0	0	0	0	0	0	0	0	0	0	0	0	0	0	0	0	0	0	0	0	0	0	0	0	0	0	0	0	0	0	0	0	0	0	k__Bacteria;p__Proteobacteria;c__Betaproteobacteria;o__Burkholderiales;f__Alcaligenaceae;g__Alcaligenes;s__Alcaligenes_faecalis;
Amycolatopsis_saalfeldensis	0	0	0	0	0	0	0	0	0	0	0	0	0	0	0	0	0	0	0	0	0	0	0	0	0	0	0	0	0	0	0	0	0	0	0	0	0	k__Bacteria;p__Actinobacteria;c__unidentified_Actinobacteria;o__Pseudonocardiales;f__Pseudonocardiaceae;g__Amycolatopsis;s__Amycolatopsis_saalfeldensis;
Clostridium_perfringens	0	0	0	0	0	0	0	0	0	0	0	0	0	0	0	0	0	0	0	0	0	0	0	0	0	0	0	0	0	0	0	0	0	0	0	0	0	k__Bacteria;p__Firmicutes;c__Clostridia;o__Clostridiales;f__Clostridiaceae_1;g__Clostridium_sensu_stricto_1;s__Clostridium_perfringens;
Mesorhizobium_albiziae	0	0	0	0	0	0	0	0	0	0	0	0	0	0	0	0	0	0	0	0	0	0	0	0	0	0	0	0	0	0	0	0	0	0	0	0	0	k__Bacteria;p__Proteobacteria;c__Alphaproteobacteria;o__Rhizobiales;f__Phyllobacteriaceae;g__Mesorhizobium;s__Mesorhizobium_albiziae;
Prevotella_micans	0	0	0	0	0	0	0	0	0	0	0	0	0	0	0	0	0	0	0	0	0	0	0	0	0	0	0	0	0	0	0	0	0	0	0	0	0	k__Bacteria;p__Bacteroidetes;c__Bacteroidia;o__Bacteroidales;f__Prevotellaceae;g__Prevotella;s__Prevotella_micans;
Prevotella_disiens	0	0	0	0	0	0	0	0	0	0	0	0	0	0	0	0	0	0	0	0	0	0	0	0	0	0	0	0	0	0	0	0	0	0	0	0	0	k__Bacteria;p__Bacteroidetes;c__Bacteroidia;o__Bacteroidales;f__Prevotellaceae;g__Prevotella;s__Prevotella_disiens;
Castellaniella_defragrans	0	0	0	0	0	0	0	0	0	0	0	0	0	0	0	0	0	0	0	0	0	0	0	0	0	0	0	0	0	0	0	0	0	0	0	0	0	k__Bacteria;p__Proteobacteria;c__Betaproteobacteria;o__Burkholderiales;f__Alcaligenaceae;g__Castellaniella;s__Castellaniella_defragrans;
Brevibacterium_ravenspurgense	0	0	0	0	0	0	0	0	0	0	0	0	0	0	0	0	0	0	0	0	0	0	0	0	0	0	0	0	0	0	0	0	0	0	0	0	0	k__Bacteria;p__Actinobacteria;c__unidentified_Actinobacteria;o__Micrococcales;f__Brevibacteriaceae;g__Brevibacterium;s__Brevibacterium_ravenspurgense;
Lachnospiraceae_oral_clone_MCE9_173	0	0	0	0	0	0	0	0	0	0	0	0	0	0	0	0	0	0	0	0	0	0	0	0	0	0	0	0	0	0	0	0	0	0	0	0	0	k__Bacteria;p__Firmicutes;c__Clostridia;o__Clostridiales;f__Lachnospiraceae;g__Moryella;s__Lachnospiraceae_oral_clone_MCE9_173;
Candidatus_Rickettsiella_isopodorum	0	0	0	0	0	0	0	0	0	0	0	0	0	0	0	0	0	0	0	0	0	0	0	0	0	0	0	0	0	0	0	0	0	0	0	0	0	k__Bacteria;p__Proteobacteria;c__Gammaproteobacteria;o__Legionellales;f__Coxiellaceae;g__Rickettsiella;s__Candidatus_Rickettsiella_isopodorum;
Lysinibacillus_massiliensis	0	0	0	0	0	0	0	0	0	0	0	0	0	0	0	0	0	0	0	0	0	0	0	0	0	0	0	0	0	0	0	0	0	0	0	0	0	k__Bacteria;p__Firmicutes;c__Bacilli;o__Bacillales;f__Planococcaceae;g__Lysinibacillus;s__Lysinibacillus_massiliensis;
Prevotella_buccae	0	0	0	0	0	0	0	0	0	0	0	0	0	0	0	0	0	0	0	0	0	0	0	0	0	0	0	0	0	0	0	0	0	0	0	0	0	k__Bacteria;p__Bacteroidetes;c__Bacteroidia;o__Bacteroidales;f__Prevotellaceae;g__Prevotella_7;s__Prevotella_buccae;
Alistipes_finegoldii	0	0	0	0	0	0	0	0	0	0	0	0	0	0	0	0	0	0	0	0	0	0	0	0	0	0	0	0	0	0	0	0	0	0	0	0	0	k__Bacteria;p__Bacteroidetes;c__Bacteroidia;o__Bacteroidales;f__Rikenellaceae;g__Alistipes;s__Alistipes_finegoldii;
Prevotella_sp._oral_clone_FX046	0	0	0	0	0	0	0	0	0	0	0	0	0	0	0	0	0	0	0	0	0	0	0	0	0	0	0	0	0	0	0	0	0	0	0	0	0	k__Bacteria;p__Bacteroidetes;c__Bacteroidia;o__Bacteroidales;f__Prevotellaceae;g__unidentified_Prevotellaceae;s__Prevotella_sp._oral_clone_FX046;
Prevotella_timonensis	0	0	0	0	0	0	0	0	0	0	0	0	0	0	0	0	0	0	0	0	0	0	0	0	0	0	0	0	0	0	0	0	0	0	0	0	0	k__Bacteria;p__Bacteroidetes;c__Bacteroidia;o__Bacteroidales;f__Prevotellaceae;g__Prevotella;s__Prevotella_timonensis;
Slackia_exigua	0	0	0	0	0	0	0	0	0	0	0	0	0	0	0	0	0	0	0	0	0	0	0	0	0	0	0	0	0	0	0	0	0	0	0	0	0	k__Bacteria;p__Actinobacteria;c__Coriobacteriia;o__Coriobacteriales;f__Coriobacteriaceae;g__Slackia;s__Slackia_exigua;
Intestinimonas_sp._GD2	0	0	0	0	0	0	0	0	0	0	0	0	0	0	0	0	0	0	0	0	0	0	0	0	0	0	0	0	0	0	0	0	0	0	0	0	0	k__Bacteria;p__Firmicutes;c__Clostridia;o__Clostridiales;f__Ruminococcaceae;g__unidentified_Ruminococcaceae;s__Intestinimonas_sp._GD2;
Pseudomonas_sp._SG4502	0	0	0	0	0	0	0	0	0	0	0	0	0	0	0	0	0	0	0	0	0	0	0	0	0	0	0	0	0	0	0	0	0	0	0	0	0	k__Bacteria;p__Proteobacteria;c__Gammaproteobacteria;o__Pseudomonadales;f__Pseudomonadaceae;g__Pseudomonas;s__Pseudomonas_sp._SG4502;
Aureimonas_altamirensis	0	0	0	0	0	0	0	0	0	0	0	0	0	0	0	0	0	0	0	0	0	0	0	0	0	0	0	0	0	0	0	0	0	0	0	0	0	k__Bacteria;p__Proteobacteria;c__Alphaproteobacteria;o__Rhizobiales;f__Aurantimonadaceae;g__Aureimonas;s__Aureimonas_altamirensis;
Dorea_longicatena	0	0	0	0	0	0	0	0	0	0	0	0	0	0	0	0	0	0	0	0	0	0	0	0	0	0	0	0	0	0	0	0	0	0	0	0	0	k__Bacteria;p__Firmicutes;c__Clostridia;o__Clostridiales;f__Lachnospiraceae;g__Dorea;s__Dorea_longicatena;
Aeriscardovia_aeriphila	0	0	0	0	0	0	0	0	0	0	0	0	0	0	0	0	0	0	0	0	0	0	0	0	0	0	0	0	0	0	0	0	0	0	0	0	0	k__Bacteria;p__Actinobacteria;c__unidentified_Actinobacteria;o__Bifidobacteriales;f__Bifidobacteriaceae;g__Aeriscardovia;s__Aeriscardovia_aeriphila;
Acetobacter_tropicalis	0	0	0	0	0	0	0	0	0	0	0	0	0	0	0	0	0	0	0	0	0	0	0	0	0	0	0	0	0	0	0	0	0	0	0	0	0	k__Bacteria;p__Proteobacteria;c__Alphaproteobacteria;o__Rhodospirillales;f__Acetobacteraceae;g__Acetobacter;s__Acetobacter_tropicalis;
Megasphaera_micronuciformis	0	0	0	0	0	0	0	0	0	0	0	0	0	0	0	0	0	0	0	0	0	0	0	0	0	0	0	0	0	0	0	0	0	0	0	0	0	k__Bacteria;p__Firmicutes;c__Negativicutes;o__Selenomonadales;f__Veillonellaceae;g__Megasphaera;s__Megasphaera_micronuciformis;
Sanguibacter_inulinus	0	0	0	0	0	0	0	0	0	0	0	0	0	0	0	0	0	0	0	0	0	0	0	0	0	0	0	0	0	0	0	0	0	0	0	0	0	k__Bacteria;p__Actinobacteria;c__unidentified_Actinobacteria;o__Micrococcales;f__Sanguibacteraceae;g__Sanguibacter;s__Sanguibacter_inulinus;
Photobacterium_phosphoreum	0	0	0	0	0	0	0	0	0	0	0	0	0	0	0	0	0	0	0	0	0	0	0	0	0	0	0	0	0	0	0	0	0	0	0	0	0	k__Bacteria;p__Proteobacteria;c__Gammaproteobacteria;o__Vibrionales;f__Vibrionaceae;g__Photobacterium;s__Photobacterium_phosphoreum;
Propionimicrobium_lymphophilum	0	0	0	0	0	0	0	0	0	0	0	0	0	0	0	0	0	0	0	0	0	0	0	0	0	0	0	0	0	0	0	0	0	0	0	0	0	k__Bacteria;p__Actinobacteria;c__unidentified_Actinobacteria;o__Propionibacteriales;f__Propionibacteriaceae;g__Propionimicrobium;s__Propionimicrobium_lymphophilum;
Propionibacterium_sp._oral_clone_BN085	0	0	0	0	0	0	0	0	0	0	0	0	0	0	0	0	0	0	0	0	0	0	0	0	0	0	0	0	0	0	0	0	0	0	0	0	0	k__Bacteria;p__Actinobacteria;c__unidentified_Actinobacteria;o__Propionibacteriales;f__Propionibacteriaceae;g__Propionibacterium;s__Propionibacterium_sp._oral_clone_BN085;
Wolinella_sp._feline_oral_taxon_098	0	0	0	0	0	0	0	0	0	0	0	0	0	0	0	0	0	0	0	0	0	0	0	0	0	0	0	0	0	0	0	0	0	0	0	0	0	k__Bacteria;p__Proteobacteria;c__Epsilonproteobacteria;o__Campylobacterales;f__Helicobacteraceae;g__Wolinella;s__Wolinella_sp._feline_oral_taxon_098;
Shuttleworthia_satelles	0	0	0	0	0	0	0	0	0	0	0	0	0	0	0	0	0	0	0	0	0	0	0	0	0	0	0	0	0	0	0	0	0	0	0	0	0	k__Bacteria;p__Firmicutes;c__Clostridia;o__Clostridiales;f__Lachnospiraceae;g__Shuttleworthia;s__Shuttleworthia_satelles;
Bacteroides_acidifaciens	0	0	0	0	0	0	0	0	0	0	0	0	0	0	0	0	0	0	0	0	0	0	0	0	0	0	0	0	0	0	0	0	0	0	0	0	0	k__Bacteria;p__Bacteroidetes;c__Bacteroidia;o__Bacteroidales;f__Bacteroidaceae;g__Bacteroides;s__Bacteroides_acidifaciens;
Luteimonas_terricola	0	0	0	0	0	0	0	0	0	0	0	0	0	0	0	0	0	0	0	0	0	0	0	0	0	0	0	0	0	0	0	0	0	0	0	0	0	k__Bacteria;p__Proteobacteria;c__Gammaproteobacteria;o__Xanthomonadales;f__Xanthomonadaceae;g__Luteimonas;s__Luteimonas_terricola;
Desulfovibrio_sp._canine_oral_taxon_070	0	0	0	0	0	0	0	0	0	0	0	0	0	0	0	0	0	0	0	0	0	0	0	0	0	0	0	0	0	0	0	0	0	0	0	0	0	k__Bacteria;p__Proteobacteria;c__Deltaproteobacteria;o__Desulfovibrionales;f__Desulfovibrionaceae;g__Desulfovibrio;s__Desulfovibrio_sp._canine_oral_taxon_070;
Pseudoramibacter_alactolyticus	0	0	0	0	0	0	0	0	0	0	0	0	0	0	0	0	0	0	0	0	0	0	0	0	0	0	0	0	0	0	0	0	0	0	0	0	0	k__Bacteria;p__Firmicutes;c__Clostridia;o__Clostridiales;f__Eubacteriaceae;g__Pseudoramibacter;s__Pseudoramibacter_alactolyticus;
Thiothrix_disciformis	0	0	0	0	0	0	0	0	0	0	0	0	0	0	0	0	0	0	0	0	0	0	0	0	0	0	0	0	0	0	0	0	0	0	0	0	0	k__Bacteria;p__Proteobacteria;c__Gammaproteobacteria;o__Thiotrichales;f__Thiotrichaceae;g__Thiothrix;s__Thiothrix_disciformis;
Mycoplasma_salivarium	0	0	0	0	0	0	0	0	0	0	0	0	0	0	0	0	0	0	0	0	0	0	0	0	0	0	0	0	0	0	0	0	0	0	0	0	0	k__Bacteria;p__Tenericutes;c__Mollicutes;o__Mycoplasmatales;f__Mycoplasmataceae;g__Mycoplasma;s__Mycoplasma_salivarium;
Desulfovibrio_oryzae	0	0	0	0	0	0	0	0	0	0	0	0	0	0	0	0	0	0	0	0	0	0	0	0	0	0	0	0	0	0	0	0	0	0	0	0	0	k__Bacteria;p__Proteobacteria;c__Deltaproteobacteria;o__Desulfovibrionales;f__Desulfovibrionaceae;g__Desulfovibrio;s__Desulfovibrio_oryzae;
Myroides_profundi	0	0	0	0	0	0	0	0	0	0	0	0	0	0	0	0	0	0	0	0	0	0	0	0	0	0	0	0	0	0	0	0	0	0	0	0	0	k__Bacteria;p__Bacteroidetes;c__Flavobacteriia;o__Flavobacteriales;f__Flavobacteriaceae;g__Myroides;s__Myroides_profundi;
Caldinitratiruptor_microaerophilus	0	0	0	0	0	0	0	0	0	0	0	0	0	0	0	0	0	0	0	0	0	0	0	0	0	0	0	0	0	0	0	0	0	0	0	0	0	k__Bacteria;p__Firmicutes;c__Clostridia;o__Clostridiales;f__Family_XVIII;g__Caldinitratiruptor;s__Caldinitratiruptor_microaerophilus;
Paenibacillus_campinasensis	0	0	0	0	0	0	0	0	0	0	0	0	0	0	0	0	0	0	0	0	0	0	0	0	0	0	0	0	0	0	0	0	0	0	0	0	0	k__Bacteria;p__Firmicutes;c__Bacilli;o__Bacillales;f__Paenibacillaceae;g__Paenibacillus;s__Paenibacillus_campinasensis;
Parabacteroides_goldsteinii	0	0	0	0	0	0	0	0	0	0	0	0	0	0	0	0	0	0	0	0	0	0	0	0	0	0	0	0	0	0	0	0	0	0	0	0	0	k__Bacteria;p__Bacteroidetes;c__Bacteroidia;o__Bacteroidales;f__Porphyromonadaceae;g__Parabacteroides;s__Parabacteroides_goldsteinii;
Candidatus_Saccharibacteria_bacterium_UB2523	0	0	0	0	0	0	0	0	0	0	0	0	0	0	0	0	0	0	0	0	0	0	0	0	0	0	0	0	0	0	0	0	0	0	0	0	0	k__Bacteria;p__Saccharibacteria;c__unidentified_Saccharibacteria;o__unidentified_Saccharibacteria;f__unidentified_Saccharibacteria;g__unidentified_Saccharibacteria;s__Candidatus_Saccharibacteria_bacterium_UB2523;
Exiguobacterium_sp._AT1b	0	0	0	0	0	0	0	0	0	0	0	0	0	0	0	0	0	0	0	0	0	0	0	0	0	0	0	0	0	0	0	0	0	0	0	0	0	k__Bacteria;p__Firmicutes;c__Bacilli;o__Bacillales;f__Family_XII;g__Exiguobacterium;s__Exiguobacterium_sp._AT1b;
Propionibacterium_propionicum	0	0	0	0	0	0	0	0	0	0	0	0	0	0	0	0	0	0	0	0	0	0	0	0	0	0	0	0	0	0	0	0	0	0	0	0	0	k__Bacteria;p__Actinobacteria;c__unidentified_Actinobacteria;o__Propionibacteriales;f__Propionibacteriaceae;g__Propionibacterium;s__Propionibacterium_propionicum;
iron-reducing_bacterium_enrichment_culture_clone_HN29	0	0	0	0	0	0	0	0	0	0	0	0	0	0	0	0	0	0	0	0	0	0	0	0	0	0	0	0	0	0	0	0	0	0	0	0	0	k__Bacteria;p__Bacteroidetes;c__Sphingobacteriia;o__Sphingobacteriales;f__Lentimicrobiaceae;g__unidentified_Lentimicrobiaceae;s__iron-reducing_bacterium_enrichment_culture_clone_HN29;
Dorea_formicigenerans	0	0	0	0	0	0	0	0	0	0	0	0	0	0	0	0	0	0	0	0	0	0	0	0	0	0	0	0	0	0	0	0	0	0	0	0	0	k__Bacteria;p__Firmicutes;c__Clostridia;o__Clostridiales;f__Lachnospiraceae;g__Dorea;s__Dorea_formicigenerans;
Johnsonella_ignava	0	0	0	0	0	0	0	0	0	0	0	0	0	0	0	0	0	0	0	0	0	0	0	0	0	0	0	0	0	0	0	0	0	0	0	0	0	k__Bacteria;p__Firmicutes;c__Clostridia;o__Clostridiales;f__Lachnospiraceae;g__Johnsonella;s__Johnsonella_ignava;
TM7_phylum_sp._canine_oral_taxon_363	0	0	0	0	0	0	0	0	0	0	0	0	0	0	0	0	0	0	0	0	0	0	0	0	0	0	0	0	0	0	0	0	0	0	0	0	0	k__Bacteria;p__Saccharibacteria;c__unidentified_Saccharibacteria;o__unidentified_Saccharibacteria;f__unidentified_Saccharibacteria;g__Candidatus_Saccharimonas;s__TM7_phylum_sp._canine_oral_taxon_363;
Aquihabitans_daechungensis	0	0	0	0	0	0	0	0	0	0	0	0	0	0	0	0	0	0	0	0	0	0	0	0	0	0	0	0	0	0	0	0	0	0	0	0	0	k__Bacteria;p__Actinobacteria;c__Acidimicrobiia;o__Acidimicrobiales;f__Iamiaceae;g__Iamia;s__Aquihabitans_daechungensis;
Cupriavidus_basilensis	0	0	0	0	0	0	0	0	0	0	0	0	0	0	0	0	0	0	0	0	0	0	0	0	0	0	0	0	0	0	0	0	0	0	0	0	0	k__Bacteria;p__Proteobacteria;c__Betaproteobacteria;o__Burkholderiales;f__Burkholderiaceae;g__Cupriavidus;s__Cupriavidus_basilensis;
Acholeplasmatales_bacterium_canine_oral_taxon_172	0	0	0	0	0	0	0	0	0	0	0	0	0	0	0	0	0	0	0	0	0	0	0	0	0	0	0	0	0	0	0	0	0	0	0	0	0	k__Bacteria;p__Tenericutes;c__Mollicutes;o__Acholeplasmatales;f__Acholeplasmataceae;g__Acholeplasma;s__Acholeplasmatales_bacterium_canine_oral_taxon_172;
Lactobacillus_fermentum	0	0	0	0	0	0	0	0	0	0	0	0	0	0	0	0	0	0	0	0	0	0	0	0	0	0	0	0	0	0	0	0	0	0	0	0	0	k__Bacteria;p__Firmicutes;c__Bacilli;o__Lactobacillales;f__Lactobacillaceae;g__Lactobacillus;s__Lactobacillus_fermentum;
Actinomyces_europaeus	0	0	0	0	0	0	0	0	0	0	0	0	0	0	0	0	0	0	0	0	0	0	0	0	0	0	0	0	0	0	0	0	0	0	0	0	0	k__Bacteria;p__Actinobacteria;c__unidentified_Actinobacteria;o__Actinomycetales;f__Actinomycetaceae;g__Actinomyces;s__Actinomyces_europaeus;
Nevskia_ramosa	0	0	0	0	0	0	0	0	0	0	0	0	0	0	0	0	0	0	0	0	0	0	0	0	0	0	0	0	0	0	0	0	0	0	0	0	0	k__Bacteria;p__Proteobacteria;c__Gammaproteobacteria;o__Xanthomonadales;f__Nevskiaceae;g__Nevskia;s__Nevskia_ramosa;
Chryseobacterium_sp._A5	0	0	0	0	0	0	0	0	0	0	0	0	0	0	0	0	0	0	0	0	0	0	0	0	0	0	0	0	0	0	0	0	0	0	0	0	0	k__Bacteria;p__Bacteroidetes;c__Flavobacteriia;o__Flavobacteriales;f__Flavobacteriaceae;g__Chryseobacterium;s__Chryseobacterium_sp._A5;
Prevotella_zoogleoformans	0	0	0	0	0	0	0	0	0	0	0	0	0	0	0	0	0	0	0	0	0	0	0	0	0	0	0	0	0	0	0	0	0	0	0	0	0	k__Bacteria;p__Bacteroidetes;c__Bacteroidia;o__Bacteroidales;f__Bacteroidaceae;g__Bacteroides;s__Prevotella_zoogleoformans;
Sphingobacterium_mizutaii	0	0	0	0	0	0	0	0	0	0	0	0	0	0	0	0	0	0	0	0	0	0	0	0	0	0	0	0	0	0	0	0	0	0	0	0	0	k__Bacteria;p__Bacteroidetes;c__Sphingobacteriia;o__Sphingobacteriales;f__Sphingobacteriaceae;g__Sphingobacterium;s__Sphingobacterium_mizutaii;
TM7_phylum_sp._oral_clone_FR058	0	0	0	0	0	0	0	0	0	0	0	0	0	0	0	0	0	0	0	0	0	0	0	0	0	0	0	0	0	0	0	0	0	0	0	0	0	k__Bacteria;p__Saccharibacteria;c__unidentified_Saccharibacteria;o__unidentified_Saccharibacteria;f__unidentified_Saccharibacteria;g__unidentified_Saccharibacteria;s__TM7_phylum_sp._oral_clone_FR058;
Sphingomonas_aerolata	0	0	0	0	0	0	0	0	0	0	0	0	0	0	0	0	0	0	0	0	0	0	0	0	0	0	0	0	0	0	0	0	0	0	0	0	0	k__Bacteria;p__Proteobacteria;c__Alphaproteobacteria;o__Sphingomonadales;f__Sphingomonadaceae;g__Sphingomonas;s__Sphingomonas_aerolata;
Mogibacterium_diversum	0	0	0	0	0	0	0	0	0	0	0	0	0	0	0	0	0	0	0	0	0	0	0	0	0	0	0	0	0	0	0	0	0	0	0	0	0	k__Bacteria;p__Firmicutes;c__Clostridia;o__Clostridiales;f__Family_XIII;g__Mogibacterium;s__Mogibacterium_diversum;
Parabacteroides_distasonis	0	0	0	0	0	0	0	0	0	0	0	0	0	0	0	0	0	0	0	0	0	0	0	0	0	0	0	0	0	0	0	0	0	0	0	0	0	k__Bacteria;p__Bacteroidetes;c__Bacteroidia;o__Bacteroidales;f__Porphyromonadaceae;g__Parabacteroides;s__Parabacteroides_distasonis;
Arsenicicoccus_bolidensis	0	0	0	0	0	0	0	0	0	0	0	0	0	0	0	0	0	0	0	0	0	0	0	0	0	0	0	0	0	0	0	0	0	0	0	0	0	k__Bacteria;p__Actinobacteria;c__unidentified_Actinobacteria;o__Micrococcales;f__Intrasporangiaceae;g__Arsenicicoccus;s__Arsenicicoccus_bolidensis;
Proteus_vulgaris	0	0	0	0	0	0	0	0	0	0	0	0	0	0	0	0	0	0	0	0	0	0	0	0	0	0	0	0	0	0	0	0	0	0	0	0	0	k__Bacteria;p__Proteobacteria;c__Gammaproteobacteria;o__Enterobacteriales;f__Enterobacteriaceae;g__Proteus;s__Proteus_vulgaris;
Desulfobulbus_sp._Dsb5	0	0	0	0	0	0	0	0	0	0	0	0	0	0	0	0	0	0	0	0	0	0	0	0	0	0	0	0	0	0	0	0	0	0	0	0	0	k__Bacteria;p__Proteobacteria;c__Deltaproteobacteria;o__Desulfobacterales;f__Desulfobulbaceae;g__Desulfobulbus;s__Desulfobulbus_sp._Dsb5;
Gluconobacter_cerinus	0	0	0	0	0	0	0	0	0	0	0	0	0	0	0	0	0	0	0	0	0	0	0	0	0	0	0	0	0	0	0	0	0	0	0	0	0	k__Bacteria;p__Proteobacteria;c__Alphaproteobacteria;o__Rhodospirillales;f__Acetobacteraceae;g__Gluconobacter;s__Gluconobacter_cerinus;
Clostridiales_bacterium_canine_oral_taxon_100	0	0	0	0	0	0	0	0	0	0	0	0	0	0	0	0	0	0	0	0	0	0	0	0	0	0	0	0	0	0	0	0	0	0	0	0	0	k__Bacteria;p__Firmicutes;c__Clostridia;o__Clostridiales;f__Ruminococcaceae;g__Ruminococcaceae_UCG-014;s__Clostridiales_bacterium_canine_oral_taxon_100;
Vogesella_perlucida	0	0	0	0	0	0	0	0	0	0	0	0	0	0	0	0	0	0	0	0	0	0	0	0	0	0	0	0	0	0	0	0	0	0	0	0	0	k__Bacteria;p__Proteobacteria;c__Betaproteobacteria;o__Neisseriales;f__Neisseriaceae;g__Vogesella;s__Vogesella_perlucida;
Desulfotomaculum_nigrificans	0	0	0	0	0	0	0	0	0	0	0	0	0	0	0	0	0	0	0	0	0	0	0	0	0	0	0	0	0	0	0	0	0	0	0	0	0	k__Bacteria;p__Firmicutes;c__Clostridia;o__Clostridiales;f__Peptococcaceae;g__Desulfotomaculum;s__Desulfotomaculum_nigrificans;
Veillonellaceae_bacterium_DNF00626	0	0	0	0	0	0	0	0	0	0	0	0	0	0	0	0	0	0	0	0	0	0	0	0	0	0	0	0	0	0	0	0	0	0	0	0	0	k__Bacteria;p__Firmicutes;c__Negativicutes;o__Selenomonadales;f__Veillonellaceae;g__Dialister;s__Veillonellaceae_bacterium_DNF00626;
Thermomonas_hydrothermalis	0	0	0	0	0	0	0	0	0	0	0	0	0	0	0	0	0	0	0	0	0	0	0	0	0	0	0	0	0	0	0	0	0	0	0	0	0	k__Bacteria;p__Proteobacteria;c__Gammaproteobacteria;o__Xanthomonadales;f__Xanthomonadaceae;g__Thermomonas;s__Thermomonas_hydrothermalis;
Selenomonas_artemidis	0	0	0	0	0	0	0	0	0	0	0	0	0	0	0	0	0	0	0	0	0	0	0	0	0	0	0	0	0	0	0	0	0	0	0	0	0	k__Bacteria;p__Firmicutes;c__Negativicutes;o__Selenomonadales;f__Veillonellaceae;g__Selenomonas_3;s__Selenomonas_artemidis;
Collinsella_aerofaciens	0	0	0	0	0	0	0	0	0	0	0	0	0	0	0	0	0	0	0	0	0	0	0	0	0	0	0	0	0	0	0	0	0	0	0	0	0	k__Bacteria;p__Actinobacteria;c__Coriobacteriia;o__Coriobacteriales;f__Coriobacteriaceae;g__Collinsella;s__Collinsella_aerofaciens;
Prevotella_enoeca	0	0	0	0	0	0	0	0	0	0	0	0	0	0	0	0	0	0	0	0	0	0	0	0	0	0	0	0	0	0	0	0	0	0	0	0	0	k__Bacteria;p__Bacteroidetes;c__Bacteroidia;o__Bacteroidales;f__Prevotellaceae;g__Prevotella_7;s__Prevotella_enoeca;
[Clostridium]_hiranonis	0	0	0	0	0	0	0	0	0	0	0	0	0	0	0	0	0	0	0	0	0	0	0	0	0	0	0	0	0	0	0	0	0	0	0	0	0	k__Bacteria;p__Firmicutes;c__Clostridia;o__Clostridiales;f__Peptostreptococcaceae;g__Peptoclostridium;s__[Clostridium]_hiranonis;
